# Supplementary material for: Shedding Light on tRNA-Derived Fragment Repertoire in Facs Blood Cells
Source: Preprints.org preprint supplement (doi:10.20944/preprints202409.0477.v1), 2024-09-05
Supplement: Supplementary file 1 [file supplementary]

## Sheet: Лист1
tRF_ID	seq	Type	eos	eos	mon	mon	mon	mon	mon	er	er	er	er	er	lym	lym	lym	lym	ne	ne	bas	bas
			pat1	pat3	pat1	pat2	pat3	pat4	pat5	pat1er	pat2er	pat3er	pat4er	pat5er	pat1	pat2	pat3	pat5	pat2	pat3	pat1	pat2
tRF#33-87R8WP9N1EWJDW	TCCCTGGTGGTCTAGTGGTTAGGATTCGGCGCT	5_tRF	349871	17606	10594	34714	6688	54397	7874	1494	1535	3622	2116	10640	8406	8262	18138	31402	3572	180247	36691	90542
tRF#33-79MP9P9NH57SD3	GTTTCCGTAGTGTAGTGGTTATCACGTTCGCCT	5_tRF	475193	12647	3765	43337	4955	2194	3424	1111	307	1730	427	634	1758	1309	2963	1734	673	119693	36773	25448
tRF#37-87R8WP9N1EWJQ72	TCCCTGGTGGTCTAGTGGTTAGGATTCGGCGCTCTCA	5_tRNA_halve	383242	3591	6279	82940	3073	1446	6127	321	164	1221	319	133	599	541	577	2976	1092	56856	14814	16156
tRF#34-87R8WP9N1EWJI5	TCCCTGGTGGTCTAGTGGTTAGGATTCGGCGCTC	5_tRNA_halve	161428	6207	5004	51724	6116	5364	11070	366	398	1118	539	494	1904	3339	4363	10764	2076	156785	59340	48553
tRF#35-79MP9P9NH57S36	GTTTCCGTAGTGTAGTGGTTATCACGTTCGCCTCA	5_tRNA_halve	296743	4165	2627	33908	2915	598.995	2678	461.997	167.994	1464.99	235.998	271.998	574	351	541	781	289.998	24499	14282	11437
tRF#35-87R8WP9N1EWJQ7	TCCCTGGTGGTCTAGTGGTTAGGATTCGGCGCTCT	5_tRNA_halve	186768	4405	4445	48352	4061	1139	4784	241	165	814	241	185	486	698	661	3015	778	88660	24874	19922
tRF#32-87R8WP9N1EWJM	TCCCTGGTGGTCTAGTGGTTAGGATTCGGCGC	5_tRF	47728	1930	3026	5710	2491	4320	1558	282	106	840	124	315	1208	2097	2254	4809	222	15781	3820	5354
tRF#23-Z87HFK8SDZ	TTTGGGTGCGAGAGGTCCCGGGT	i-tRF	7987	2343	9032	6630	2940	90	4845	53	925.002	3576	254.998	1073	8664	6723	4045	1763	211	2450	874	17160
tRF#33-79MP9P9MH57SD3	GTTTCCGTAGTGTAGTGGTCATCACGTTCGCCT	5_tRF	61403	631	223	2574	155	201	310	116	17	127	23	48	100	63	119	67	53	4837	2963	909
tRF#30-87R8WP9N1EWJ	TCCCTGGTGGTCTAGTGGTTAGGATTCGGC	5_tRF	19725	1620	16159	4171	1286	1000	4584	267	220	1580	194	322	2478	2220	1005	2325	282	2584	2281	4630
tRF#32-PNR8YP9LON4V3	GCATTGGTGGTTCAGTGGTAGAATTCTCGCCT	5_tRF	37626	967	742	2939	373	185	487	87	105	934	62	244	233	209	238	522	42	11994	3148	1955
tRF#22-WE8SPOX52	TCGATTCCCGGCCAATGCACCA	3_tRF	151.002	96	5311	3171	1402	550	1479	1116	5625	22121	671.998	14985	543	535	162	255	115.002	613	254.002	1150
tRF#31-87R8WP9N1EWJ0	TCCCTGGTGGTCTAGTGGTTAGGATTCGGCG	5_tRF	8941	653	6952	3466	1170	1684	2556	344	401	3657	132	706	2216	2143	2095	3617	170	4730	1559	3022
tRF#32-79MP9P9NH57SJ	GTTTCCGTAGTGTAGTGGTTATCACGTTCGCC	5_tRF	23793	559	2690	3229	1099	774	1364	128	54	306	59	126	756	669	701	506	66	5341	1522	2176
tRF#20-VBY9PYKH	TAGAATTCTCGCCTGCCACG	i-tRF	1710	597	8197	5170	1804	637	2999	130	608	4439	1069	1227	2843	2375	1234	831	201	1285	730	5906
tRF#22-WE8S68L52	TCGATTCCCGGGCGGCGCACCA	3_tRF	230	164	6423	3189	1116	554	1363	1291	3948	7203	356	5800	516	395	183	267	121	774	296	2074
tRF#50-79MP9P9NH57S362VO0SR	GTTTCCGTAGTGTAGTGGTTATCACGTTCGCCTCACACGCGAAAGGTCCC	5_tRF	219.996	107.001	957.006	6535.01	124.992	322.002	6908	1766	594	10636	288.999	357.003	1634	139.01	446	2643	82.008	83.997	124.002	373.995
tRF#23-79MP9P9NDD	GTTTCCGTAGTGTAGTGGTTATC	5_tRF	12755	1874	6281	2472	630	145	1960	104	100	158	119	87	843	347	112	396	85	1170	1340	1811
tRF#31-PSQP4PW3FJIKB	GCCCGGCTAGCTCAGTCGGTAGAGCATGGGA	5_tRF	722.001	87	10151	3666	1245	1305	1777	164.999	163.999	1635	131.001	804.999	1025	1197	426	1454	156	2261	326.001	3590
tRF#27-M3WE8SSP6D2	CGGGTTCGATTCCCGGTCAGGGAACCA	3_tRF	492.993	200.997	12989	5211	990.999	750.996	2910	544.001	126	113.999	135	136.998	348.99	473	117	860.99	143.001	1687	1253.01	1517
tRF#22-ZKXU53K8N	TTGGGTGCGAGAGGTCCCGGGT	i-tRF	2615	723	4184	2022	834	52.998	1912	67.998	191.998	784	65.998	265	2836	2388	1169	543	44	647	276.002	5469
tRF#32-KY7343RX6NMH3	CCCTGGTGGTCTAGTGGTTAGGATTCGGCGCT	5_tRF	6147	613	241	1457	426	2851	236	210	142	268	268	729	198	247	839	1268	128	6285	644	2269
tRF#37-897PVP941QKS3W2	TCCTCGTTAGTATAGTGGTGAGTATCCCCGCCTGTCA	5_tRNA_halve	15224	205	680	2603	100	144	415	27	0	37	20	11	75	188	70	304	64	2140	1609	1023
tRF#35-79MP9PMNH5IS36	GTTTCCGTAGTGTAGCGGTTATCACATTCGCCTCA	5_tRNA_halve	14918	139	391	3643	321	53	411	17	0	84	0	17	95	21	30	120	10	1595	1905	397
tRF#32-FP18LPMBQ4NKJ	AGCAGAGTGGCGCAGCGGAAGCGTGCTGGGCC	5_tRF	8834	304.992	261.99	1992	343.008	544.005	220.995	67.995	60.003	126.999	67.995	120.996	197	166.01	203	856	102.996	6445.01	907.002	1513
tRF#34-79MP9P9NH57S15	GTTTCCGTAGTGTAGTGGTTATCACGTTCGCCTC	5_tRNA_halve	10824	369.99	261	1664.99	295.002	11.997	137.997	32.004	33.003	162.999	52.002	12.996	34	31	32.99	71	11.997	5282.99	2543.99	768.996
tRF#32-PS5P4PW3FJHP1	GCCCGGATAGCTCAGTCGGTAGAGCATCAGAC	5_tRF	693.996	31.998	766.002	662.004	991.998	2176	1483	13.002	36	48	12	40.998	283	270	245	7490	54	5346	217.002	1045
tRF#50-PNR8YP9LON4VN1EH6KK8	GCATTGGTGGTTCAGTGGTAGAATTCTCGCCTGCCACGCGGGAGGCCCGG	5_tRF	52.003	18.998	131.999	2159	54.999	142.002	701.001	733.005	326.998	16144	159.999	262.997	238	22	58	307	49	12.999	22.001	56
tRF#37-QKF1R3WE8RO86J2	GCGGGAGACCGGGGTTCGATTCCCCGACGGGGAGCCA	3_tRNA_halve	1100	48.996	2228	7457.99	148.992	2273	480.012	242.004	561.996	461.004	359.988	273	69	217.99	72	3364	223.008	1172.99	290.004	339
tRF#31-FP18LPMBQ4NKD	AGCAGAGTGGCGCAGCGGAAGCGTGCTGGGC	5_tRF	7126	357.003	916.002	1109	673.004	428.994	513.999	26.001	171.995	365.001	212.994	460.008	268.01	167	270	2460.99	53.001	4276.99	362.997	794.988
tRF#29-K87SIRMM12E2	CCCGGGTTCGATTCCCGGTCAGGGAACCA	3_tRF	267.003	72.999	11350	2400.99	333	446	2151	189	63	150.003	87.003	51.003	238	305	65	648	64.998	735.003	511.002	755.001
tRF#28-897PVP9N1QDJ	TCCTCGTTAGTATAGTGGTTAGTATCCC	5_tRF	130	228	345	1946	1791	3800	268	3622	1350	2185	496	855	188	427	556	746	72	491	754	383
tRF#34-PNR8YP9LON4VHM	GCATTGGTGGTTCAGTGGTAGAATTCTCGCCTGC	5_tRNA_halve	1364	58	1323	5619	738	186	1208	22	136	147	41	110	84	194	185	647	0	4553	1520	1413
tRF#26-9MV47P596VE	TGGTCTAGTGGTTAGGATTCGGCGCT	i-tRF	4883	754	380	764	287	913	202	84	75	74.5	183	552	205	201	381	3379	69	3593	594	1928
tRF#26-87R8WP9N1EE	TCCCTGGTGGTCTAGTGGTTAGGATT	5_tRF	4804	1046	3792	1118	240	139	1067	44	43	197	72	45	455	744	32	694	102	1110	2105	1265
tRF#36-PNR8YP9LON4VN1B	GCATTGGTGGTTCAGTGGTAGAATTCTCGCCTGCCA	5_tRNA_halve	2876	52	2825	2784	233	59	907	37	188	2019	207	383	229	1004	64	1263	40	2386	377	619
tRF#30-PNR8YP9LON4V	GCATTGGTGGTTCAGTGGTAGAATTCTCGC	5_tRF	457	70	2245	1308	495	437	850	330	1689	4285	340	1539	799	945	437	970	46	461	137	444
tRF#22-PNR8YP9LL	GCATTGGTGGTTCAGTGGTAGA	5_tRF	2779	165	1711	939	401	175	300	185	351	5889	309	850	473	850	136	747	277	464	235	290
tRF#25-R95933JKB6	GGTTCGATTCCCGGTCAGGGAACCA	3_tRF	143.001	126	9388.01	2257	234.999	186.003	1481.99	100.998	39.996	78.003	56.997	36	206	355.01	49	490.01	119.997	820.998	507.996	729.999
tRF#34-79MP9P9NH57S1O	GTTTCCGTAGTGTAGTGGTTATCACGTTCGCCTA	5_tRNA_halve	9674.03	293.986	57.001	1237.02	132.006	85.001	38.997	57.001	36.001	23.002	16.002	45.997	26	0	88	10	10.003	3661.02	884.002	566.993
tRF#33-PNR8YP9LON4VDP	GCATTGGTGGTTCAGTGGTAGAATTCTCGCCTG	5_tRNA_halve	384	136	1490	1796	512	349	2462	24	169	417	163	662	448	465	559	1413	23	1456	1421	2003
tRF#29-87R8WP9N1EJ4	TCCCTGGTGGTCTAGTGGTTAGGATTCGG	5_tRF	2749	443	1906	1161	391	326	1011	140	104	1965	39	155	648	811	382	823	70	838	596	1299
tRF#33-897PVP941QKSD3	TCCTCGTTAGTATAGTGGTGAGTATCCCCGCCT	5_tRF	11041	151	359	219	41	53	90	44	0	44	12	26	118	53	97	85	10	355	2712	288
tRF#22-735L8RPY5	GTGGTGAGTATCCCCGCCTGTC	i-tRF	4718	445	596	1446	467	65	605	40	57	45	0	10	174	221	82	156	90	4309	1303	878
tRF#37-79MP9P9NH57S362	GTTTCCGTAGTGTAGTGGTTATCACGTTCGCCTCACA	5_tRNA_halve	4505.99	71.001	930.996	5130	219.996	101.007	719.991	36.999	0	82.998	16.002	0	73	71	91	454	38.997	1966	203.004	900
tRF#33-79MP9PMNH5ISD3	GTTTCCGTAGTGTAGCGGTTATCACATTCGCCT	5_tRF	8471	173	156	1602	275	101	109	39	0	26	0	23	83	50	151	155	14	2268	1368	486
tRF#20-NJWHIM9Z	CTGGCTCGCGATGTCTGTTT	3_U_tRF	4099	1061	2032	1686	549	1155	680	46	0	11	14	13	218	698	261	617	12	221	1219	294
tRF#26-RNLNK88KO1B	GGGTTCGATTCCCGGTCAGGGAACCA	3_tRF	188.001	92.997	6848.99	1780	267.003	196.002	1801	63.999	34.002	189	61.002	27.999	174	288	42	420	74.997	594	460.998	587.997
tRF#30-RK9P4P9L5HMV	GGGGGTGTAGCTCAGTGGTAGAGCGCGTGC	5_tRF	1262.99	492	1036	2559	153	43.998	223.002	24	175.002	770.004	48	109.002	1025.99	3355.01	1173.01	507	24	154.002	252	776.004
tRF#33-KY7343RX6NMHD5	CCCTGGTGGTCTAGTGGTTAGGATTCGGCGCTC	5_tRNA_halve	2622	170	128	1938	352	255	311	36	25	26	89	25	46	98	188	292	54	5233	892	1023
tRF#20-PNR8YP9L	GCATTGGTGGTTCAGTGGTA	5_tRF	1102	137	817	1091	996	458	175	197	670	3702	213	274	702	1367	272	206	343	713	82	261
tRF#20-Q1Q89P9L	GCGCCGCTGGTGTAGTGGTA	5_tRF	5634	655	2712	504	229	143	696	0	64	97	66	42	380	201	55	182	125	409	583	698
tRF#33-PW5SVP9N15WV0E	GCCGTGATCGTATAGTGGTTAGTACTCTGCGTT	5_tRF	3349.01	135	482.004	1403	201.996	2299	261.999	152.001	206.001	150.003	96.003	315	198	62	63	403	23.004	2183	1188	248.004
tRF#24-Z87HFK8S2E	TTTGGGTGCGAGAGGTCCCGGGTT	i-tRF	665	330	1923	1848	438	112	804.998	0	27	138	26	17	1044	2158	502	220	26	163	98	2072
tRF#36-KY7343RX6NMH49B	CCCTGGTGGTCTAGTGGTTAGGATTCGGCGCTCTCA	5_tRNA_halve	5723	92	121	3140	183	10	115	47	32	26	40	0	0	0	16	70	31	2015	203	353
tRF#20-18YKISQI	AGTGGTTAGGATTCGGCGCT	i-tRF	2818	711	489	499	375	399	194	0	31	30	114	190	334	320	251	266	89	2036	724	1419
tRF#23-87R8WP9NY	TCCCTGGTGGTCTAGTGGTTAGG	5_tRF	1049	607	2896	525	113	230	378	115	111	1174	38	97	344	876	33	681	91	482	488	930
tRF#31-79MP9P9NH57SD	GTTTCCGTAGTGTAGTGGTTATCACGTTCGC	5_tRF	2027	141	1856	1451	808	197	536	53	81	281	30	117	614	274	260	527	15	826	208	787
tRF#35-R9JP9P9NH5SYNX	GGTTCCATAGTGTAGTGGTTATCACGTCTGCTTTA	5_tRNA_halve	3959	147	258	1297	242	44	210	19	0	37	0	0	75	59	45	132	17	2902	678	599
tRF#36-87R8WP9N1EWJQ7D	TCCCTGGTGGTCTAGTGGTTAGGATTCGGCGCTCTC	5_tRNA_halve	6623	94	61	1253	95	0	105	0	0	76	0	0	0	0	10	27	0	1349	392	209
tRF#29-79MP9P9NH525	GTTTCCGTAGTGTAGTGGTTATCACGTTC	5_tRF	7108	192	990	301	92	0	302	15	79	78	21	54	167	164	54	145	0	77	133	136
tRF#28-1IK34ZMKQ4DZ	AGGCTCCAGTCTCTTCGGGGGCGTGGGT	i-tRF	565.005	95.998	261.002	752.003	89.999	142.002	689.997	22.001	872.998	2286	110.999	1722	366	357	241	552	48.006	207.998	60.004	530.005
tRF#39-EH623K7SIR3DR2I2	ACGCGGGAGACCGGGGTTCGATTCCCCGACGGGGAGCCA	3_tRNA_halve	2638.99	39	262.008	1655.99	21	371.004	75	31.992	15	64.008	28.008	21	18	64.99	29	1707	167.004	1859	220.992	444.996
tRF#37-QNR8VP9NFQFY392	GCGTTGGTGGTATAGTGGTTAGCATAGCTGCCTTCCA	5_tRNA_halve	3662	43	169	2206	237	27	383	13	0	53	0	0	17	12	15	161	0	2145	282	255
tRF#20-SBKKRSL3	GTAAACCAGGGGTCGCGAGT	i-tRF	1185	272	1166	670	612	85	654	19	0	93	50	0	912	584	442	198	19	462	169	1824
tRF#36-S2I7L7P5QK11M3E	GTAGAATTCTCGCCTGCCACGCGGGAGGCCCGGGTT	i-tRF	0	21	198	4467	21	182	858	0	0	0	0	0	308	1595	366	857	0	14	11	499
tRF#21-PNR8YP9L0	GCATTGGTGGTTCAGTGGTAG	5_tRF	1052	99	1698	847	594	91	422	50	95	1898	69	143	325	322	139	144	63	300	121	862
tRF#27-897PVP9N1QJ	TCCTCGTTAGTATAGTGGTTAGTATCC	5_tRF	87	184	219	1114	882	1501	159	1282	305	629	168	223	109	252	359	397	48	281	567	308
tRF#20-40KK5Y93	CTAAGCCAGGGATTGTGGGT	i-tRF	127	101	1967	656	1326	360	335	46	137	245	63	251	232	216	82	57	43	1019	82	1047
tRF#28-3KYUYRR6RBD2	CCGGGTTCGATTCCCGGTCAGGGAACCA	3_tRF	116.001	41.004	4202	968.994	194.004	83.997	888.003	72.999	36.999	47.997	50.004	41.004	121	133	17	237.01	34.002	310.995	294.003	393.003
tRF#33-PS5P4PW3FJHPW	GCCCGGATAGCTCAGTCGGTAGAGCATCAGACT	5_tRF	1409	39	202.998	246	109.002	233.998	619.002	27	19.998	31.002	10.002	31.002	126	161	108	2489	25.998	1662	430.998	297
tRF#23-79MP9P9MDD	GTTTCCGTAGTGTAGTGGTCATC	5_tRF	4633	286	1206	582	92	0	422	34	34	31	19	0	159	52	34	43	13	177	218	196
tRF#34-KY7343RX6NMHH3	CCCTGGTGGTCTAGTGGTTAGGATTCGGCGCTCT	5_tRNA_halve	2549	107	72	1565	238	0	71	26	18	12	54	0	0	10	15	76	14	2572	329	403
tRF#25-3K7SIR3DR2	CCGGGGTTCGATTCCCCGACGGGGA	3_tRF	1267	243	231	1134	307.996	280.996	167	231.996	407.004	1094	105.996	67	244	471	46	978.99	44.004	245.004	266.996	245.996
tRF#36-M2OSRNLNKSEK51B	CGGGAGACCGGGGTTCGATTCCCCGACGGGGAGCCA	3_tRNA_halve	675.996	27.996	1026.01	2083	39.996	868.992	174.996	181.992	332.004	300	146.004	171.996	47	152	39	895.98	90	382.008	151.992	166.992
tRF#28-3K7SIR3DR2DV	CCGGGGTTCGATTCCCCGACGGGGAGCC	3_tRF	2536.01	105	105.996	1562	87	180	395.004	148.008	147.996	182.004	39	90	66	193.99	53	625	65.004	554.004	207.996	162
tRF#26-PW5SVP9N15E	GCCGTGATCGTATAGTGGTTAGTACT	5_tRF	1016	207	621.999	615.996	233.001	543.996	285.003	164.997	1031.99	453.996	56.997	284.004	331	173	157	513	12.996	192.996	467.001	126.999
tRF#50-P4R8YP9LON4VN1EH6KK8	GCATGGGTGGTTCAGTGGTAGAATTCTCGCCTGCCACGCGGGAGGCCCGG	5_tRF	11	0	19	589	14	45	132	331	123	5704	49	114	44	0	17	105	15	0	0	17
tRF#37-QKF1R38E8RO86J2	GCGGGAGACCGGGGTTCAATTCCCCGACGGGGAGCCA	3_tRNA_halve	290	16	673	4055	27	853	126	52	90	66	48	49	0	34	11	348	41	337	91	82
tRF#27-87R8WP9N1E5	TCCCTGGTGGTCTAGTGGTTAGGATTC	5_tRF	1480	331	1388	526	105	0	568	34	32	259	25	63	167	185	35	199	25	355	836	458
tRF#32-34HWH3RXSINHQ	CCGTGATCGTATAGTGGTTAGTACTCTGCGTT	5_tRF	3610	132.003	318.996	351.999	72.999	207.999	126.999	15.003	26.001	45.999	11.997	28.998	89	46	29	133	0	1013.99	410.004	252
tRF#23-PS5U891803	GCCCGGATGATCCTCAGTGGTCT	5_tRF	3402	428	511	203	102	47	243	36	201	277	65	69	98	66	14	89	14	250	467	244
tRF#28-87R8WP9N1E0K	TCCCTGGTGGTCTAGTGGTTAGGATTCG	5_tRF	1468	160	1202	341	74	98	585	84	76	380	17	43	311	321	130	388	24	217	189	329
tRF#20-SBJ25R93	GTAAACAGGAGATCCTGGGT	i-tRF	114	83	412	449	1070	51	213	44	101	319	13	293	248	310	141	23	0	918	196	1337
tRF#29-RK9P4P9L5HH0	GGGGGTGTAGCTCAGTGGTAGAGCGCGTG	5_tRF	40.998	22.998	21	165.996	30	0	15	13.998	21	1966	15	267	347	2241	749	89	0	0	13.002	126.006
tRF#35-897PVP941QKS3W	TCCTCGTTAGTATAGTGGTGAGTATCCCCGCCTGT	5_tRNA_halve	1451	103	175	710	84	150	143	0	127	57	110	146	61	157	172	265	12	513	624	966
tRF#32-RK9P4P9L5HMVQ	GGGGGTGTAGCTCAGTGGTAGAGCGCGTGCTT	5_tRF	3178	234.996	84	436.998	121.002	37.002	27	0	0	51	0	0	38	206	35	143	0	271.002	811.002	261.996
tRF#26-SP5830MMUKD	GTCAGGATGGCCGAGCGGTCTAAGGC	5_tRF	1721.99	122.004	801.999	370.008	124.992	82.998	433.998	0	20.997	439.002	0	17.001	202.01	177	68	101	10.998	190.998	88.002	553.005
tRF#31-PNR8YP9LON4VD	GCATTGGTGGTTCAGTGGTAGAATTCTCGCC	5_tRF	1895	40	226	231	131	172	480	76	67	287	38	112	108	137	69	380	0	706	138	191
tRF#22-WE8SP6X52	TCGATTCCCGGCCCATGCACCA	3_tRF	0	0	236	43	32	27	52	101	474	3381	32	1018	31	17	0	20	0	0	0	14
tRF#20-3ZW0HI7Z	CCTTTTCGAGATACTGTTTT	3_U_tRF	150	64	2671	381	15	39	490	0	0	0	0	0	446	276	75	210	0	25	330	160
tRF#38-L85DMKYUYRLHR0D2	CGCGGGAGACCGGGGTTCGATTCCCCGACGGGGAGCCA	3_tRNA_halve	1009.01	18.996	1021.01	772.008	0	300.996	75	14.004	24	53.004	39.996	15	17	59	15	1231	75	228	30.996	246.996
tRF#38-31QJ3KYUYRR6RBD2	CCGCCGCGGCCCGGGTTCGATTCCCGGTCAGGGAACCA	3_tRNA_halve	38.997	0	945	2102.99	32.004	626.004	242.001	135.999	87.003	50.004	36	58.005	10	30	13	420.99	17.001	232.002	96.993	42.003
tRF#26-RK9P4P9L5HE	GGGGGTGTAGCTCAGTGGTAGAGCGT	5_tRF	709	67	629	879	117	23	115	0	38	155	0	47	501	659	504	244	0	161	82	280
tRF#36-RKVP4P9L5FZUNF0	GGGGGTATAGCTCAGTGGTAGAGCATTTGACTGCAG	5_tRNA_halve	4719	31	38	39	0	24	33	0	0	0	0	0	12	0	0	0	0	68	146	99
tRF#21-WE8SPOX5D	TCGATTCCCGGCCAATGCACC	3_tRF	0	0	57.002	19.998	14	13	27.002	0	906.002	1040	449.998	2625	0	0	0	13	26.002	0	0	15
tRF#34-PW5SVP9N15WV2P	GCCGTGATCGTATAGTGGTTAGTACTCTGCGTTG	5_tRNA_halve	26.001	0	142.002	829.998	122.004	809.001	745.992	47.997	141.003	490.005	105.003	563.004	51	50	34	592	0	311.004	88.002	47.997
tRF#22-WD8S746D2	TCGACTCCCGGTGTGGGAACCA	3_tRF	43	50	1680	488	351	115	336	0	29	68	23	375	387	246	36	71	35	211	63	546
tRF#30-7EMQ18Y3E7QN	GTGATCGTATAGTGGTTAGTACTCTGCGTT	5_tRF	1843	100.998	118.998	380.997	133.996	691.002	72.999	72.999	37.998	69.003	0	59.004	80	31	55	89	0	664.992	257.004	152.001
tRF#33-R9JP9P9NH5SYDQ	GGTTCCATAGTGTAGTGGTTATCACGTCTGCTT	5_tRF	3252	72	101	160	56	0	58	0	0	0	0	0	46	51	27	111	0	670	129	153
tRF#20-VIJNRX5H	TAGCTCAGTTGGTTAGAGCG	i-tRF	0	0	129	629.003	246.998	1876	36	462.003	70	589	33	105	0	39	128	387	0	59	35	43
tRF#23-ZKXU53K80E	TTGGGTGCGAGAGGTCCCGGGTT	i-tRF	286.002	86.002	886.996	823	160.996	0	314.002	0	0	0	0	0	356	810	159	112	0	81.998	53.002	702
tRF#27-9MV47P596V5	TGGTCTAGTGGTTAGGATTCGGCGCTC	i-tRF	1068	91	81	448	90	50	120	0	0	26	0	13	43	43	40	572	19	1377	243	474
tRF#20-R4L2RRM3	GGGTGCGAGAGGTCCCGGGT	i-tRF	632	159	632	472	106	0	255	0	65	249	17	64	427	413	201	107	14	135	31	795
tRF#23-897PVP94Z	TCCTCGTTAGTATAGTGGTGAGT	5_tRF	2032	176	568	180	197	0	104	0	75	51	50	136	147	228	45	72	19	153	248	249
tRF#30-FP18LPMBQ4NK	AGCAGAGTGGCGCAGCGGAAGCGTGCTGGG	5_tRF	1063	56.997	173.988	196.002	28.008	115.002	79.992	21.996	104.994	821.997	237.996	342	54	36	30	180	0	888.003	95.994	164.997
tRF#25-PW5SVP9N15	GCCGTGATCGTATAGTGGTTAGTAC	5_tRF	26.001	14.004	84.002	242.997	163.996	349.999	55.997	727	202.004	684.001	64.997	148.001	63	79	49	1402	0	115.001	154	38.997
tRF#31-MUWLV47PU9XWE	CGTGATCGTATAGTGGTTAGTACTCTGCGTT	5_tRF	1543	83.997	99	245.997	105.003	990.99	45.999	154.998	126	73.998	23.004	117.999	48	17	18	54	0	558.999	171.999	107.001
tRF#30-PSQP4PW3FJIK	GCCCGGCTAGCTCAGTCGGTAGAGCATGGG	5_tRF	23.001	0	644.001	336.999	98.999	52.001	123	49	44.001	2093	35.001	120.999	120	152	38	178	11.001	113.001	15	288.999
tRF#22-WE8SPOL52	TCGATTCCCGGCCAACGCACCA	3_tRF	44	12	1851	720	228	161	529	0	21	16	0	28	230	255	49	51	0	68	41	196
tRF#28-PW5SVP9N1503	GCCGTGATCGTATAGTGGTTAGTACTCT	5_tRF	190.998	86.004	214.002	315	173.997	246.996	1307	60.003	244.998	230.004	56.997	95.004	153	122	101	546	9.999	140.004	150.003	39.996
tRF#21-V47P596VE	TAGTGGTTAGGATTCGGCGCT	i-tRF	903	167	711	363	141	84	100	0	0	0	13	38	229	175	111	56	15	534	155	525
tRF#28-R8WP9N1EWJDW	GGTGGTCTAGTGGTTAGGATTCGGCGCT	i-tRF	604	136	62	194	78	776	43	0	22	46	22	126	86	84	141	220	23	929	348	329
tRF#21-NJWHIM9ZE	CTGGCTCGCGATGTCTGTTTT	3_U_tRF	813	165	756	717	80	468	198	10	0	0	0	0	43	170	72	169	0	72	418	91
tRF#29-897PVP9N1Q1J	TCCTCGTTAGTATAGTGGTTAGTATCCCC	5_tRF	37	15	92	409	378	779	57	725	243	461	96	142	47	63	75	264	12	89	112	60
tRF#20-HJ839L5F	ATAGCTCAGTTGGTAGAGCA	i-tRF	35	0	79	394	306	631	43	368	175	765	53	183	0	75	111	649	0	123	133	23
tRF#21-LNK88KO1B	CGATTCCCGGTCAGGGAACCA	3_tRF	35	0	946	308	0	24	229	16	19	685	0	70	186	1117	22	261	39	126	13	42
tRF#35-QNR8VP9NFQFY39	GCGTTGGTGGTATAGTGGTTAGCATAGCTGCCTTC	5_tRNA_halve	882	16	63	640	134	72	73	11	0	12	0	0	19	15	36	97	0	1369	393	277
tRF#22-WE8RO86J2	TCGATTCCCCGACGGGGAGCCA	3_tRF	0	0	981.996	368.004	69	23.004	15	174	195	555.004	51.996	183	282	248	39	99	42	381.996	26.004	370.992
tRF#36-18YKISQI45LSM1D	AGTGGTTAGGATTCGGCGCTCTCACCGCCGCGGCCC	i-tRF	113	38	703	1179	51	85	102	16	17	13	0	17	132	402	113	130	16	54	25	818
tRF#22-N1EH6KK8N	CTGCCACGCGGGAGGCCCGGGT	i-tRF	141	32	686	278	292	242	228	0	104	522	48	273	163	99	32	65	20	194	104	424
tRF#23-RKVP4P9LDS	GGGGGTATAGCTCAGTGGTAGAG	5_tRF	242.002	87.997	72	66.001	45.998	496.997	24.997	34	0	72.003	0	0	543	258	306	1113	15.001	86.005	76.998	394.006
tRF#24-87R8WP9NEX	TCCCTGGTGGTCTAGTGGTTAGGA	5_tRF	1503	123	816	122	42	0	136	0	15	281	22	25	77	122	22	63	32	224	94	161
tRF#28-MIF91SS2P4DX	CGGCTAGCTCAGTCGGTAGAGCATGGGA	5_tRF	345.999	93	951.999	252.999	125.001	24.999	159.999	0	12	50.001	20.001	15.999	233	303	116	61	21.999	170.001	51.999	858.999
tRF#20-79MP9PMN	GTTTCCGTAGTGTAGCGGTT	5_tRF	2577	86	246	159	0	0	157	0	15	22	15	29	123	69	14	43	0	42	206	58
tRF#31-389MV47P596VE	CCTGGTGGTCTAGTGGTTAGGATTCGGCGCT	5_tRF	307	40	24	105	124	385	34	0	14	14	13	47	290	266	351	694	14	562	88	476
tRF#30-PW5SVP9N15WV	GCCGTGATCGTATAGTGGTTAGTACTCTGC	5_tRF	70.002	11.997	312.003	458.001	181.998	366.003	577.998	30.996	359.001	283.995	78.003	383.004	96	84	46	260	0	107.001	90.999	44.001
tRF#22-NMEH623KN	CTGTCACGCGGGAGACCGGGGT	i-tRF	153	13	1042	269	226	123	169	74	38	330	0	254	333	163	50	53	19	160	31	329
tRF#29-08R959KUMKEV	ACCGGGGTTCGATTCCCCGACGGGGAGCC	3_tRF	1135	45.996	63.996	795	77.004	125.004	207.996	48	78	75.996	33.996	51.996	33	78	28	340	41.004	264	105.996	93.996
tRF#50-87R8WP9N1EWJQ72S3HPS	TCCCTGGTGGTCTAGTGGTTAGGATTCGGCGCTCTCACCGCCGCGGCCCG	5_tRF	0	19	94	699	11	89	198	233	18	1336	25	26	202	30	38	632	11	10	0	34
tRF#21-JOWU1M70E	CATAATCTGAAGGTCGTGAGT	i-tRF	348	58	360	156	623	45	221	0	0	0	0	0	152	190	163	16	0	559	74	654
tRF#32-RKVP4P9L5FZU3	GGGGGTATAGCTCAGTGGTAGAGCATTTGACT	5_tRF	2376	96	38	92	0	0	22	0	0	0	0	0	33	39	15	75	0	187	449	169
tRF#29-3JVIJMRPFQIX	CCGGCTAGCTCAGTCGGTAGAGCATGGGA	5_tRF	93	9.999	1481	228	45.999	41.001	366	0	0	57.999	9.999	17.001	183	212	42	112	12	123	32.001	504
tRF#29-QNR8VP94FQEW	GCGTTGGTGGTATAGTGGTGAGCATAGCT	5_tRF	142.998	13.998	344.998	334.002	163.002	0	995.998	0	0	22.002	0	16.998	480	180	234	501	0	25.998	28.998	85.998
tRF#32-R29P4P9L5HJVQ	GGGGATGTAGCTCAGTGGTAGAGCGCATGCTT	5_tRF	1256.99	80.002	40.002	150.001	161.997	27	32	0	15	38.997	17	0	59	34	10	100	0	1003	320.002	202.002
tRF#32-P4R8YP9LON4V3	GCATGGGTGGTTCAGTGGTAGAATTCTCGCCT	5_tRF	768	12	57	532	117	0	62	11	18	173	40	180	50	41	178	370	0	771	24	137
tRF#25-PNR8YP9LON	GCATTGGTGGTTCAGTGGTAGAATT	5_tRF	645	43	199	311	328	59	176	81	171	294	39	149	196	216	135	293	10	76	46	68
tRF#35-9EYK46S9Y8RH93	TGGATTTAGGCTCCAGTCTCTTCGGGGGCGTGGGT	i-tRF	700	77	98	178	34	18	207	0	96	370	16	101	160	156	147	175	0	100	28	852
tRF#21-VBY9PYKHD	TAGAATTCTCGCCTGCCACGC	i-tRF	72	47	688	305	172	85	267	0	52	137	189	112	187	181	85	63	17	122	101	603
tRF#23-9V881X3S0Q	TGTGCTCCGGAGTTACCTCGTTT	3_U_tRF	46	0	1414	224	20	76	285	0	0	27	22	22	391	457	132	312	0	0	27	23
tRF#29-PNR8YP9LONHK	GCATTGGTGGTTCAGTGGTAGAATTCTCG	5_tRF	106	0	361	143	79	74	160	105	231	967	55	286	180	223	46	220	10	134	25	72
tRF#22-ZK8U53K8N	TTGGGTCCGAGAGGTCCCGGGT	i-tRF	96	25	917	200	184	20	129	31	22	0	22	0	301	349	83	15	10	161	69	831
tRF#20-OJR44ZIZ	GAAGCGGGTGCTCTTATTTT	3_U_tRF	46	0	2269	72	0	352	105	0	0	0	0	0	359	165	11	38	0	0	18	13
tRF#27-7343RX6NMH3	GTGGTCTAGTGGTTAGGATTCGGCGCT	i-tRF	616	63	32	127	42	328	43	0	0	19	11	85	113	87	192	337	10	808	111	394
tRF#28-PNR8YP9LOND5	GCATTGGTGGTTCAGTGGTAGAATTCTC	5_tRF	104	18	225	179	114	145	462	204	447	577	57	267	125	139	73	129	0	37	40	68
tRF#37-QNR8VP94FQFY392	GCGTTGGTGGTATAGTGGTGAGCATAGCTGCCTTCCA	5_tRNA_halve	651	0	133.998	1352	82.998	0	316.002	0	0	0	0	0	12	11	22	141	0	400.002	76.998	96
tRF#31-PS5P4PW3FJHPB	GCCCGGATAGCTCAGTCGGTAGAGCATCAGA	5_tRF	79.002	0	745.002	265.998	153	193.998	129	0	0	40.998	0	25.002	125	71	49	957	10.002	190.002	37.002	204
tRF#29-9MV47P596VJ5	TGGTCTAGTGGTTAGGATTCGGCGCTCTC	i-tRF	1990	47	50	416	40	0	42	0	0	0	0	0	0	0	0	0	0	503	40	133
tRF#17-Y2R79KJ	TTAGAGGTCTTGGGGCC	5_U_tRF	93	0	117	389	198	298	269	0	161	426	0	81	207	156	208	356	0	140	28	123
tRF#25-RNLNKSEK51	GGGTTCGATTCCCCGACGGGGAGCC	3_tRF	1053	35.004	61.992	753.996	98.004	81	215.004	12.996	45	41.004	24	33	40	86	32	207	21	197.004	116.004	75
tRF#31-ZPQR17NSRJ7KE	TTTAGGCTCCAGTCTCTTCGGGGGCGTGGGT	i-tRF	267	40	104	194	30	40	275	42	204	451	42	406	139	151	113	249	10	62	20	366
tRF#27-Q1Q89P9L842	GCGCCGCTGGTGTAGTGGTATCATGCA	5_tRF	785	63	1104	131	46	22	273	41	14	76	14	0	97	79	24	96	26	114	68	129
tRF#32-897PVP941QKSJ	TCCTCGTTAGTATAGTGGTGAGTATCCCCGCC	5_tRF	1371	48	304	55	37	0	65	24	32	33	19	21	165	449	63	149	0	118	132	96
tRF#36-897PVP941QKS3WD	TCCTCGTTAGTATAGTGGTGAGTATCCCCGCCTGTC	5_tRNA_halve	1037	32	17	444	15	0	23	0	0	0	0	0	0	0	0	27	0	838	604	143
tRF#30-OSRNLNKSEK51	GACCGGGGTTCGATTCCCCGACGGGGAGCC	3_tRF	1209	32.004	90	515.004	60	42.996	171	15.996	133.008	70.008	63.996	89.004	31	57	0	193.99	51.996	182.004	78.996	81
tRF#37-86J8WPMN1E8Y7Z2	TCCCACATGGTCTAGCGGTTAGGATTCCTGGTTTTCA	5_tRNA_halve	2799	0	0	0	0	0	0	0	0	0	0	0	0	0	0	0	0	223	96	27
tRF#25-S3M8309NDJ	GTAGTCGTGGCCGAGTGGTTAAGGC	5_tRF	2083	76	143	115	25	37	46	63	43	62	0	23	89	69	56	46	0	61	36	52
tRF#19-VBY9PY11	TAGAATTCTCGCCTGCCAC	i-tRF	0	0	17	0	0	0	0	0	0	0	0	0	1215	929	616	347	0	0	0	0
tRF#31-RK9P4P9L5HMVE	GGGGGTGTAGCTCAGTGGTAGAGCGCGTGCT	5_tRF	320.004	63	173.004	478.002	72	12	28.002	0	0	0	0	0	123	1207	315	112	0	16.998	88.002	96
tRF#20-9LON4VN1	TGGTAGAATTCTCGCCTGCC	i-tRF	115	49	843	221	189	54	392	0	46	0	15	39	212	134	43	61	0	204	68	385
tRF#28-9MV47P596V03	TGGTCTAGTGGTTAGGATTCGGCGCTCT	i-tRF	1037	64	69	391	108	15	51	0	0	0	0	0	14	0	10	62	0	854	176	214
tRF#26-QNR8VP9NFQB	GCGTTGGTGGTATAGTGGTTAGCATA	5_tRF	1496	63	265	257	123	36	120	53	0	19	0	17	85	84	46	37	23	109	113	100
tRF#27-RKVP4P9L5FQ	GGGGGTATAGCTCAGTGGTAGAGCATT	5_tRF	28	20	53	436	348	303	63	476	132	209	76	108	21	86	77	189	17	72	158	110
tRF#27-FP18LPMBQ43	AGCAGAGTGGCGCAGCGGAAGCGTGCT	5_tRF	1273	86.994	560.997	143.001	69.003	121.995	144	27.999	12.996	10.998	0	0	62	25	20	233.01	16.002	21.996	14.004	102.006
tRF#22-WEKSPM852	TCGATCCCCGGCATCTCCACCA	3_tRF	0	0	939	0	0	0	311	31	180	1166	18	115	93	37	0	14	0	0	0	14
tRF#35-VUY9QZR4L2RRM3	TATGATTCTCGCTTTGGGTGCGAGAGGTCCCGGGT	i-tRF	34.002	0	932.006	443.002	0	19.002	573.998	0	0	0	0	0	123	332	66	302	0	0	0	83
tRF#27-PNR8YP9LON3	GCATTGGTGGTTCAGTGGTAGAATTCT	5_tRF	96	13	123	184	101	62	655	208	278	436	53	210	75	93	88	114	0	32	33	45
tRF#26-08R959KUMKB	ACCGGGGTTCGATTCCCCGACGGGGA	3_tRF	416	75	58	363	144	93	72.996	87	144	400.996	35.004	66.996	85	209	29	319.99	20.004	87.996	96	80
tRF#26-RNLNKSEK51B	GGGTTCGATTCCCCGACGGGGAGCCA	3_tRF	0	42.996	916.008	411	89.004	89.004	81	60	33.996	189	15	0	159	208.99	24	162	36	69	114	144
tRF#50-R9JP9P9NH5SYNX2VF0S7	GGTTCCATAGTGTAGTGGTTATCACGTCTGCTTTACACGCAGAAGGTCCT	5_tRF	10	16	138	980	16	22	841	0	0	42	27	0	289	21	92	267	0	12	18	49
tRF#31-OSRNLNKSEK51B	GACCGGGGTTCGATTCCCCGACGGGGAGCCA	3_tRF	0	12.996	1068	321	0	78.996	0	141	26.004	348	15	0	81	145	19	228	51	110.004	24.996	168
tRF#36-M2OSRN2NKSEK51B	CGGGAGACCGGGGTTCAATTCCCCGACGGGGAGCCA	3_tRNA_halve	222	0	296	1350	10	434	62	27	43	0	23	32	0	0	0	109	0	119	49	49
tRF#33-5DMKYUYRLHR0D2	GAGACCGGGGTTCGATTCCCCGACGGGGAGCCA	3_tRF	0	12.996	923.004	411	17.004	111	0	57.996	30	159.996	12.996	0	70	168	27	370	38.004	72	33.996	291
tRF#19-70VR31KD	GTGAGTATCCCCGCCTGTC	i-tRF	58	17	28	41	0	0	0	0	0	0	0	0	675	1020	587	204	0	67	56	42
tRF#18-BS68BFD2	AACCGGGCGGAAACACCA	3_tRF	297.984	29.008	390.976	152.016	714.96	48	174	0	46.016	10	12	10	0	16	10	11.01	11.008	463.008	14	348.016
tRF#18-VIJMRP9	TAGCTCAGTCGGTAGAGC	i-tRF	0	0	0	59	98	68	0	800	118	1534	0	51	0	0	0	0	0	0	25	0
tRF#39-I7XUK87SIRMJ6VE2	ATTCTTGCGACCCGGGTTCGATTCCCGGGCGGCGCACCA	3_tRNA_halve	85	0	32	1167	27	72	156	0	0	0	0	0	0	27	35	458	0	464	64	160
tRF#30-N3R718YKISQI	CTGGTGGTCTAGTGGTTAGGATTCGGCGCT	5_tRF	285	33	35	202	111	122	32	0	0	19	14	83	141	151	196	459	24	486	103	241
tRF#30-J8O9YEKPRS93	CATGGGACTCTTAATCCCAGGGTCGTGGGT	i-tRF	108	34	255	544	51	347	137	113	11	115	16	116	36	50	50	129	11	287	63	261
tRF#25-SP5830MMUK	GTCAGGATGGCCGAGCGGTCTAAGG	5_tRF	27.999	17.001	1457	311.004	21.996	32.004	127.998	0	0	0	0	0	190	174	105	166	0	12.996	0	90
tRF#35-V0J8O9YEKPRS93	TAGAGCATGGGACTCTTAATCCCAGGGTCGTGGGT	i-tRF	325	40	448	330	25	45	139	11	74	89	10	115	102	152	54	153	0	72	19	529
tRF#27-SL735L8RPY5	GTATAGTGGTGAGTATCCCCGCCTGTC	i-tRF	701	58	100	412	69	12	99	0	0	0	0	0	0	38	0	38	0	776	253	173
tRF#18-07QSNHD2	ACCCTGCTCGCTGCGCCA	3_tRF	100	0	824	116	36	10	562	11	127	303	178	101	42	20	0	65	0	87	0	140
tRF#24-PNR8YP9LH7	GCATTGGTGGTTCAGTGGTAGAAT	5_tRF	316	23	217	234	116	89	82	187	86	438	50	37	67	75	48	495	0	49	17	74
tRF#18-8R6Q46D2	TCCCCGGCATCTCCACCA	3_tRF	19.999	0	715.995	81.998	32.998	26.999	439.992	0	213.997	122.997	297.01	284.998	78	36	0	122	0	66.997	29.001	108.01
tRF#26-M3WE8SSP6DD	CGGGTTCGATTCCCGGTCAGGGAACC	3_tRF	541.998	15.003	137.997	1017	43.002	87.003	173.997	0	55.998	0	0	74.997	13	15	10	144	0	187.002	99.999	47.997
tRF#28-3L7L73V6M9DV	CCGTAGTGTAGTGGTTATCACGTTCGCC	5_tRF	162	43	518	339	167	47	113	0	16	43	15	0	185	148	102	56	11	169	101	422
tRF#37-V47P596VW631QJJ	TAGTGGTTAGGATTCGGCGCTCTCACCGCCGCGGCCC	i-tRF	67	26	361	1251	12	82	55	17	14	10	0	20	34	143	51	35	0	32	16	387
tRF#24-R29P4P9LH9	GGGGATGTAGCTCAGTGGTAGAGC	5_tRF	165	25	103	109.003	137	120	27	264	250	319	0	27	97	83	42	568	11	93	22	124
tRF#30-QNR8VP94FQFY	GCGTTGGTGGTATAGTGGTGAGCATAGCTG	5_tRF	97.002	27	519	499.002	205.998	60	201	0	0	21	10.002	13.998	164	81	238	165	0	61.998	16.002	187.002
tRF#50-PW5SVP9N15WV7W6SJF09	GCCGTGATCGTATAGTGGTTAGTACTCTGCGTTGTGGCCGCAGCAACCTC	5_tRF	0	0	0	236.997	10.998	39.996	35.001	261.999	159.003	1511	25.002	56.997	24	0	0	195	10.998	0	0	0
tRF#19-9N1EWJI5	TGGTTAGGATTCGGCGCTC	i-tRF	10	0	0	0	0	0	0	0	0	0	0	0	1158	873	419	104	0	0	0	0
tRF#31-KY7343RX6NMHD	CCCTGGTGGTCTAGTGGTTAGGATTCGGCGC	5_tRF	766	37	70	289	138	201	38	0	0	0	12	14	10	79	86	135	0	508	34	122
tRF#20-V47P596V	TAGTGGTTAGGATTCGGCGC	i-tRF	288	63	614	373	127	0	138	0	0	0	0	0	122	99	38	31	14	105	37	459
tRF#20-RUSMKVNM	GGTGAGTATCCCCGCCTGTC	i-tRF	712	84	73	218	109	43	108	0	0	21	0	0	20	59	0	11	0	692	206	146
tRF#25-34HWH3RXSI	CCGTGATCGTATAGTGGTTAGTACT	5_tRF	398.997	79.002	156.996	171	46.998	367.002	71.001	106.002	268.002	163.998	38.997	89.001	77	28	53	124	0	68.004	123.003	64.998
tRF#27-MIF91SS2P44	CGGCTAGCTCAGTCGGTAGAGCATGGG	5_tRF	62.001	63.999	546	246	41.001	0	147.999	0	0	74.001	18	0	201	319	71	43	0	93.999	17.001	540.999
tRF#35-VUY9Q9R4L2RRM3	TATGATTCTCGCTTCGGGTGCGAGAGGTCCCGGGT	i-tRF	26.001	0	685.998	479.001	0	0	541.002	0	0	0	0	0	59	287	70	275	0	11.001	0	42.999
tRF#33-86J8WPMN1E8Y0E	TCCCACATGGTCTAGCGGTTAGGATTCCTGGTT	5_tRF	1411	16	104	49	0	0	73	0	17	0	16	0	57	184	58	122	0	146	193	25
tRF#21-LNK8KEP1B	CGATTCCCGGCCAATGCACCA	3_tRF	0	13.998	221	229	26	21	63.998	124.002	226.002	611.994	29.002	418.002	81	163	27	60	0	46.002	25.002	78.002
tRF#26-86J8WPMN1EE	TCCCACATGGTCTAGCGGTTAGGATT	5_tRF	1065	54	470	98	35	0	119	0	0	0	0	0	94	62	10	46	0	77	249	83
tRF#29-LBLM8D4N4OEQ	CGAAACGATCTCAACCTATTCTCAAACTT	5_U_tRF	75	0	1511	394	72	29	229	0	0	0	0	0	26	21	0	37	0	14	22	31
tRF#31-897PVP9N1QKSD	TCCTCGTTAGTATAGTGGTTAGTATCCCCGC	5_tRF	0	17	72	270	231	229	41	372	226	276	71	99	16	75	86	106	0	75	100	82
tRF#24-S3M8309N0Y	GTAGTCGTGGCCGAGTGGTTAAGG	5_tRF	130	163	342	398	38	22	28	32	37	462	0	25	184	173	105	130	0	35	24	109
tRF#26-PNR8YP9LOND	GCATTGGTGGTTCAGTGGTAGAATTC	5_tRF	81	22	157	199	133	24	122	59	398	501	49	258	86	78	55	70	0	17	23	71
tRF#21-RPM830MME	GGTAGCGTGGCCGAGCGGTCT	5_tRF	343.998	45	138.006	186.999	37.998	361.998	116.001	0	29.997	171	18.999	37.998	87	189	35	248	18.999	162	48.996	100.008
tRF#33-FP18LPMBQ4NKDJ	AGCAGAGTGGCGCAGCGGAAGCGTGCTGGGCCC	5_tRNA_halve	1700.99	19.998	19.998	241.992	33.003	0	40.995	0	0	0	0	0	0	0	0	13	0	177.003	85.995	39.996
tRF#28-QNR8VP94FQ9	GCGTTGGTGGTATAGTGGTGAGCATAGC	5_tRF	54	13.002	205.002	197.004	121.998	75	484.002	28.998	0	40.002	0	16.998	311	172	147	290	0	28.002	21	52.002
tRF#22-WE8SSP6D2	TCGATTCCCGGTCAGGGAACCA	3_tRF	0	0	532	227	83	18	110	43	23	336	0	181	81	194	11	69	0	158	20	146
tRF#32-JY7383RPD9W1P	CATTGGTGGTTCAGTGGTAGAATTCTCGCCTG	5_tRNA_halve	12	0	69	407	98	130	219	14	61	183	34	230	44	43	83	178	0	150	195	82
tRF#35-79MP9P9NH57S3O	GTTTCCGTAGTGTAGTGGTTATCACGTTCGCCTAA	5_tRNA_halve	1637	35	0	91	0	91	0	0	0	0	0	0	0	0	0	0	0	197.001	102.998	64.001
tRF#22-87R8WP9NH	TCCCTGGTGGTCTAGTGGTTAG	5_tRF	688	116	346	88	57	0	76	0	0	94	0	14	63	126	13	58	0	176	129	168
tRF#34-9N1EWJQ72S3HIJ	TGGTTAGGATTCGGCGCTCTCACCGCCGCGGCCC	i-tRF	65	17	619	504	27	60	68	0	0	0	0	11	108	164	45	54	10	41	31	385
tRF#26-RPM830MMUKD	GGTAGCGTGGCCGAGCGGTCTAAGGC	5_tRF	144.999	0	45.999	46.998	0	149.994	15.003	0	54	341.001	0	34.002	28	38	0	1227	0	19.998	0	27
tRF#22-Z87HFK8S4	TTTGGGTGCGAGAGGTCCCGGG	i-tRF	53	55	155.002	92	68	0	79	0	14	285	0	0	233	272	169	52	10	64	0	562
tRF#32-F1R3WE8RO86J2	AGACCGGGGTTCGATTCCCCGACGGGGAGCCA	3_tRF	0	14.004	1072.99	221.004	0	33.996	9.996	27	0	110.004	0	0	57	151	12	197	35.004	63	11.004	140.004
tRF#35-SP5830MMUKLYM9	GTCAGGATGGCCGAGCGGTCTAAGGCGCTGCGTTC	5_tRNA_halve	1291	35	21	289	20	0	25	0	0	0	0	0	0	0	0	18	0	285	75	95
tRF#16-Y2R79KD	TTAGAGGTCTTGGGGC	5_U_tRF	176	73	205	257	95	98	253	0	44	87	57	29	127	85	125	188	0	55	12	187
tRF#30-79MP9P9NH57S	GTTTCCGTAGTGTAGTGGTTATCACGTTCG	5_tRF	969	29	314	88	30	26	90	0	18	23	0	0	221	85	26	66	0	52	33	79
tRF#30-Q1Q89P9L8422	GCGCCGCTGGTGTAGTGGTATCATGCAAGA	5_tRF	76	28	472	265	78	0	154	17	60	184	16	27	193	223	82	106	18	50	11	70
tRF#20-HDPORSM3	ATAACGCCAAGGTCGCGGGT	i-tRF	15	0	370	87	127	22	109	0	0	0	0	0	373	315	31	40	0	382	18	232
tRF#29-34HWH3RXSIHM	CCGTGATCGTATAGTGGTTAGTACTCTGC	5_tRF	126	36.999	631.998	245.007	107.001	37.998	226.998	0	27	65.997	14.004	144	65	43	48	41	0	66.996	41.004	152.001
tRF#21-Z3R918VBE	TTGGTGGTTCAGTGGTAGAAT	5_tRF	133	48	268	363	98	0	175	27	28	21	14	17	39	72	111	37	0	46	60	561
tRF#29-RPM8309MUK1W	GGTAGCGTGGCCGAGTGGTCTAAGGCGCT	5_tRF	1669	85	98	25	12	0	20	0	0	0	0	0	16	39	0	10	0	33	32	78
tRF#22-ZLB6R3LUN	TTGTAAACCAGGGGTCGCGAGT	i-tRF	302	73	310	211	67	30	152	0	0	0	10	0	160	127	82	23	0	73	45	418
tRF#38-7K7RWFQ9QV70JZ0N	GTGGGGTTCCTCGCAGCTTCGCTGCGTGAGCATTTTGT	3_U_tRF	0	18	0	759	36	0	113	0	0	0	0	0	0	490	196	245	0	30	0	175
tRF#35-RPM830MMUKLY5X	GGTAGCGTGGCCGAGCGGTCTAAGGCGCTGGATTA	5_tRNA_halve	785	75	49	99	0	88	0	0	0	0	0	0	37	35	0	29	0	144	527	177
tRF#22-8B8SOUPR2	TCAAATCCCGGACGAGCCCCCA	3_tRF	9.996	0	550.002	201.008	66.99	12.999	94.992	30.009	137.001	428.007	37.002	249.008	48	33.01	0	29.01	0	30.009	11.991	71.001
tRF#40-2VR008R959KUMKF6	CACGCGGGAGACCGGGGTTCGATTCCCCGACGGGGAGCCA	3_tRNA_halve	11.004	0	347.004	367.008	0	208.992	0	20.004	21.996	45	12.996	30.996	51	93	20	707.01	0	26.004	0	75
tRF#37-79MP9P9MH57S3O2	GTTTCCGTAGTGTAGTGGTCATCACGTTCGCCTAACA	5_tRNA_halve	1121	17	54	459	14	16	60	0	0	0	0	0	0	0	0	38	0	159	28	62
tRF#21-WE8RO86JD	TCGATTCCCCGACGGGGAGCC	3_tRF	580.004	15	31.992	78	0	0	57.996	0	213.996	54	309	516.996	10	16	0	39	0	51	27	21.996
tRF#37-87R8WP9I1EWJQZ2	TCCCTGGTGGTCTAGTGGCTAGGATTCGGCGCTTTCA	5_tRNA_halve	1617	0	27	264	0	0	16	0	0	0	0	0	0	0	0	0	0	69	0	23
tRF#28-79MP9P9NH50E	GTTTCCGTAGTGTAGTGGTTATCACGTT	5_tRF	693	60	467	188	21	0	122	28	29	11	15	38	75	47	16	53	0	43	31	63
tRF#29-PW5SVP9N15JP	GCCGTGATCGTATAGTGGTTAGTACTCTG	5_tRF	20.997	0	78.003	91.998	99	478.989	347.004	19.998	25.002	151.002	0	48.996	101	57	95	237	0	65.997	45	23.004
tRF#21-LNK8QJP1B	CGATTCCCGGGCGGCGCACCA	3_tRF	0	21	238	334	61	17	77	110	218	210	0	177	75	137	23	52	0	55	22	145
tRF#50-Q1Q89P9L8422YRI7XUK8	GCGCCGCTGGTGTAGTGGTATCATGCAAGATTCCCATTCTTGCGACCCGG	5_tRF	0	0	69	685	0	53	262	103	33	301	20	27	100	14	20	216	0	0	10	46
tRF#26-RX6NMH490VD	GGTTAGGATTCGGCGCTCTCACCGCC	i-tRF	52	14	561	318	45	31	183	0	0	0	0	0	225	168	49	35	10	42	25	192
tRF#30-KY7343RX6NMH	CCCTGGTGGTCTAGTGGTTAGGATTCGGCG	5_tRF	193	17	220	189	51	82	95	25	15	181	0	49	38	65	143	162	0	275	40	101
tRF#19-VIJNRPEU	TAGCTCAGTTGGTAGAGCA	i-tRF	0	0	11	129	685	163	0	186	10	636	0	103	0	0	0	0	0	0	15	0
tRF#29-KY7343RX6N19	CCCTGGTGGTCTAGTGGTTAGGATTCGGC	5_tRF	389	57	434	192	61	92	143	23	0	81	0	0	51	46	49	72	0	123	15	104
tRF#30-897PVP9N1QKS	TCCTCGTTAGTATAGTGGTTAGTATCCCCG	5_tRF	0	11	43	219	191	245	23	147	139	472	47	57	13	35	25	92	0	58	64	30
tRF#19-VIJNRXH9	TAGCTCAGTTGGTTAGAGC	i-tRF	0	0	15	278	299	131	0	232	47	183	0	45	0	12	45	555	0	14	23	23
tRF#34-VUY9QZR4L2RR1Y	TATGATTCTCGCTTTGGGTGCGAGAGGTCCCGGG	i-tRF	0	0	114	82.004	0	0	58.998	0	0	0	0	0	247	761	153	421	0	0	0	49.002
tRF#43-79MP9P9NH57S362VD6	GTTTCCGTAGTGTAGTGGTTATCACGTTCGCCTCACACGCGAA	5_tRF	111.006	0	286.002	1013	0	27	111.996	21.996	0	14.004	12.996	0	41	16	13	124	0	0	0	89.001
tRF#21-735L8RPYE	GTGGTGAGTATCCCCGCCTGT	i-tRF	365	109	83	284	66	96	68	0	0	0	11	0	45	64	54	31	0	263	103	236
tRF#23-S3M8309NS	GTAGTCGTGGCCGAGTGGTTAAG	5_tRF	381	40	264	124	85	82	75	0	44	274	0	10	112	115	52	64	0	72	22	60
tRF#21-V47PU9XWE	TAGTGGTTAGTACTCTGCGTT	i-tRF	1357	38.997	84.996	26.001	0	0	28.998	0	0	16.002	0	0	15	0	0	0	0	152.001	105.004	44.001
tRF#20-Z3R918VB	TTGGTGGTTCAGTGGTAGAA	5_tRF	149	72	260	178	104	0	120	0	0	10	10	0	50	81	83	35	0	69	36	600
tRF#34-897PVP941QKS1P	TCCTCGTTAGTATAGTGGTGAGTATCCCCGCCTG	5_tRNA_halve	156	26	98	197	27	100	85	0	45	53	33	84	31	128	115	127	0	77	156	312
tRF#22-WE884U1D2	TCGATTCCGGCTCGAAGGACCA	3_tRF	0	0	700.002	11	0	0	175	0	48.998	724.002	0	96.002	40	19	0	11	0	13	0	0
tRF#23-PNR8YP9LD6	GCATTGGTGGTTCAGTGGTAGAA	5_tRF	163	18	222	173	99	0	71	70	21	366	18	82	80	83	52	45	25	105	22	106
tRF#27-1IK34ZMKQ44	AGGCTCCAGTCTCTTCGGGGGCGTGGG	i-tRF	0	0	0	25.998	0	0	10.003	10.997	197.995	1230.99	15.001	274.995	0	15	0	0	0	0	17.003	17.997
tRF#35-Q99P9P9NH57S36	GCTTCTGTAGTGTAGTGGTTATCACGTTCGCCTCA	5_tRNA_halve	642	0	41	548	45	20	33	0	0	0	0	0	0	0	0	0	0	346	30	108
tRF#32-79MP9P9MH57SJ	GTTTCCGTAGTGTAGTGGTCATCACGTTCGCC	5_tRF	1167	16	108	111	0	52	36	0	0	0	0	0	24	29	27	30	0	93	73	43
tRF#28-79MP9PMNH5DE	GTTTCCGTAGTGTAGCGGTTATCACATT	5_tRF	496	46	602	131	36	0	182	0	0	13	0	0	45	21	0	14	0	30	140	47
tRF#23-PW5SVP9NZ	GCCGTGATCGTATAGTGGTTAGT	5_tRF	94.995	0	36	134.001	47.997	203.004	42.003	27	95.004	81.999	0	33.003	60	80	57	602	0	108	57.996	37.998
tRF#27-M3WD8S746D2	CGGGTTCGACTCCCGGTGTGGGAACCA	3_tRF	33	23	476	459	129	0	111	45	0	0	0	0	89	86	24	178	0	0	47	80
tRF#25-R718YKISQI	GGTCTAGTGGTTAGGATTCGGCGCT	i-tRF	381	76	46	112	31	210	18	0	0	22	10	42	28	29	43	46	14	320	120	231
tRF#21-P4R8YP9L0	GCATGGGTGGTTCAGTGGTAG	5_tRF	52	41	196	248	48	0	74	0	11	562	0	55	34	32	45	36	0	24	11	303
tRF#30-34HWH3RXSINH	CCGTGATCGTATAGTGGTTAGTACTCTGCG	5_tRF	208.998	27.999	358.002	146.997	39.996	38.997	126	0	53.001	154.998	10.998	46.998	109	121	26	111	0	46.998	27	109.998
tRF#19-PNR8YPJZ	GCATTGGTGGTTCAGTGGT	5_tRF	0	0	0	0	0	0	0	0	0	0	0	0	781	575	246	152	0	0	0	0
tRF#27-6XQ6S8V0J8L	GGCTAGCTCAGTCGGTAGAGCATGGGA	5_tRF	42.999	0	261	374.001	81.999	96	83.001	0	56.001	71.001	0	89.001	81	88	57	73	0	99.999	33.999	165
tRF#37-897PVP9N1QKS3W2	TCCTCGTTAGTATAGTGGTTAGTATCCCCGCCTGTCA	5_tRNA_halve	879	11	50	361	0	18	38	0	0	0	0	0	0	0	0	170	0	98	75	53
tRF#32-MXSL735L8RPY5	CGTTAGTATAGTGGTGAGTATCCCCGCCTGTC	5_tRNA_halve	409	36	28	197	14	0	27	0	0	0	0	0	0	21	17	25	13	388	449	127
tRF#32-PSQP4PW3FJIK1	GCCCGGCTAGCTCAGTCGGTAGAGCATGGGAC	5_tRF	48.999	0	245.001	72.999	42.999	43	42	11	0	27	0	21	26	62	14	775	11.001	201.999	12.999	84.999
tRF#32-PW5SVP9N15WVN	GCCGTGATCGTATAGTGGTTAGTACTCTGCGT	5_tRF	117	0	27	210.996	114.003	354.996	68.004	24.003	81	149.004	12.996	17.001	49	100	25	121	0	156.996	71.001	27.999
tRF#25-6XQ6S8V0JU	GGCTAGCTCAGTCGGTAGAGCATGA	5_tRF	12	16.998	37.998	177	139.998	213	34.002	178.998	52.998	441	19.002	49.002	16	30	20	80	0	40.998	121.998	36
tRF#34-87R8WP9I1EWJIQ	TCCCTGGTGGTCTAGTGGCTAGGATTCGGCGCTT	5_tRNA_halve	286	16	26	185	15	102	52	0	0	0	0	0	46	32	194	463	0	164	40	76
tRF#32-897PVP9N1QKSJ	TCCTCGTTAGTATAGTGGTTAGTATCCCCGCC	5_tRF	160	0	44	110	79	65	0	54	39	29	16	0	0	10	0	1041	0	12	0	16
tRF#33-P4R8YP9LON4VDP	GCATGGGTGGTTCAGTGGTAGAATTCTCGCCTG	5_tRNA_halve	10	0	81	98	53	38	138	0	38	183	17	186	32	24	244	354	0	66	0	112
tRF#21-3OPP6N7KE	CCTAAGCCAGGGATTGTGGGT	i-tRF	36	40	107	108	92	28	0	41	194	492	158	72	11	0	0	13	0	68	14	190
tRF#51-PNR8YP9LON4VN1EH6KK80	GCATTGGTGGTTCAGTGGTAGAATTCTCGCCTGCCACGCGGGAGGCCCGGG	5_tRF	0	0	10.003	158.998	0	0	46.998	94.997	31.003	1247	18.998	21	10	0	0	22	0	0	0	0
tRF#23-YUYRR6RBD2	TTCGATTCCCGGTCAGGGAACCA	3_tRF	0	12	350	153	0	12	68	88	39	363	0	44	58	341	14	83	0	16	0	19
tRF#33-79M89P9NH5ISD3	GTTTCCGTGGTGTAGTGGTTATCACATTCGCCT	5_tRF	988	28	0	129	15	17	0	0	0	0	0	0	0	0	0	0	0	373	32	64
tRF#29-897PVP941Q1J	TCCTCGTTAGTATAGTGGTGAGTATCCCC	5_tRF	683	82	285	46	43	28	76	0	0	17	0	11	60	63	18	24	10	23	96	74
tRF#24-9V881X3SKQ	TGTGCTCCGGAGTTACCTCGTTTT	3_U_tRF	18	0	707	189	11	35	185	0	0	12	0	0	126	142	44	126	0	0	20	18
tRF#31-YSV4V47Q2WW1E	TTCCGTAGTGTAGTGGTTATCACGTTCGCCT	5_tRF	1014	30	0	212	11	0	0	0	0	0	0	0	0	0	0	0	0	241	86	35
tRF#23-YKIHFK8SDZ	TTAGGATGCGAGAGGTCCCGGGT	i-tRF	186	43	207	113	57	0	82	0	0	78	0	18	188	159	49	22	0	57	0	365
tRF#28-924ZDRJKW4DZ	TGGGACTCTTAATCCCAGGGTCGTGGGT	i-tRF	148	32	305	350	67	94	85	0	26	10	0	44	34	43	22	20	0	75	13	244
tRF#24-7SIRMM12E2	GTTCGATTCCCGGTCAGGGAACCA	3_tRF	20	11	553	244	26	19	156	175	0	98	0	0	40	85	0	66	0	48	37	32
tRF#50-79MP9P9MH57S3O2VO0SR	GTTTCCGTAGTGTAGTGGTCATCACGTTCGCCTAACACGCGAAAGGTCCC	5_tRF	13	0	56	434	0	33	354	52	20	365	0	16	82	0	21	146	0	0	0	15
tRF#24-OUR8309N0Y	GACGAGGTGGCCGAGTGGTTAAGG	5_tRF	19.999	32.998	52.997	101.002	18.998	174.001	0	138.999	45.997	662.998	18.998	41.001	39	33	26	154	0	0	14	24.003
tRF#29-3L7L73V6M9I3	CCGTAGTGTAGTGGTTATCACGTTCGCCT	5_tRF	202	35	0	252	76	137	13	0	0	0	0	0	0	10	0	0	0	466	333	61
tRF#26-W1X6L85J3KE	TCGCCTGCCACGCGGGAGGCCCGGGT	i-tRF	57	19	233	156	21	122	124	24	56	314	11	42	72	68	15	60	0	20	32	136
tRF#35-86J8WPMN1E8Y7Z	TCCCACATGGTCTAGCGGTTAGGATTCCTGGTTTT	5_tRNA_halve	1238	16	10	49	0	0	0	0	0	0	0	0	0	0	0	12	0	131	83	43
tRF#31-PSQP4PW3FJI0B	GCCCGGCTAGCTCAGTCGGTAGAGCATGAGA	5_tRF	0	0	34.998	30	10.002	24	0	31.002	0	30	12	12	16	0	13	1346	0	0	0	0
tRF#22-73VL8RPY5	GTGGTTAGTATCCCCGCCTGTC	i-tRF	361	57	47	238	58	24	67	0	0	0	0	0	0	0	0	212	0	301	108	77
tRF#18-Y2R79KDK	TTAGAGGTCTTGGGGCCG	5_U_tRF	0	0	80	229	165	183	68	0	101	289	21	12	45	27	106	143	0	10	0	37
tRF#32-ZRS3S3RX8HYV3	TTTCCGTAGTGTAGTGGTTATCACGTTCGCCT	5_tRF	799	25	0	128	15	0	0	0	0	0	0	0	0	0	0	0	0	295	148	91
tRF#37-SP5830MMUKLYM9H	GTCAGGATGGCCGAGCGGTCTAAGGCGCTGCGTTCAG	5_tRNA_halve	1084	27.999	0	91.008	0	0	0	0	0	0	0	0	0	0	0	0	0	102.996	153	36
tRF#34-79MP9PMNH5IS15	GTTTCCGTAGTGTAGCGGTTATCACATTCGCCTC	5_tRNA_halve	742	21	33	100	32	0	11	0	0	0	0	0	0	0	0	0	0	220	297	36
tRF#31-JY7383RPD9W1E	CATTGGTGGTTCAGTGGTAGAATTCTCGCCT	5_tRF	414	27	12	209	15	35	10	0	0	11	0	23	0	0	13	18	0	514	136	53
tRF#24-RK9P4P9LH9	GGGGGTGTAGCTCAGTGGTAGAGC	5_tRF	254	52	97	172	39	22	43	30	10	106	0	15	113	124	87	169	0	17	24	85
tRF#29-R9JP9P9NH523	GGTTCCATAGTGTAGTGGTTATCACGTCT	5_tRF	198	0	343	132	73	0	270	0	0	0	0	0	82	41	34	131	0	58	43	45
tRF#24-QP4PW3FJFL	GCTAGCTCAGTCGGTAGAGCATGA	i-tRF	10	19	29	128	98	142	30	273	39	158	35	48	19	46	35	127	12	38	131	26
tRF#27-34HWH3RXSI3	CCGTGATCGTATAGTGGTTAGTACTCT	5_tRF	77.004	34.002	39.996	90.999	92.997	108	212.004	45	155.997	106.992	29.997	72	32	16	40	116	0	77.004	57.996	34.002
tRF#38-P21MNKYUPR18B6D2	GCAGAAGGTCCTGGGTTCGAGCCCCAGTGGAACCACCA	3_tRNA_halve	87	0	472.998	581.001	0	58.998	87.999	0	0	0	0	0	0	0	0	82	0	48.999	15	0
tRF#28-3JVIJMRPFQDY	CCGGCTAGCTCAGTCGGTAGAGCATGGG	5_tRF	39	12.999	501	182.001	24	11.001	123.999	0	0	0	0	0	78	71	15	38	0	47.001	14.001	276
tRF#22-1S91547O4	AGTCGTGGCCGAGTGGTTAAGG	5_tRF	0	10	10	158	21	146	0	65	102	553	29	0	20	51	46	165	0	0	21	36
tRF#27-PW5SVP9N155	GCCGTGATCGTATAGTGGTTAGTACTC	5_tRF	114.003	27	90.999	105.003	77.004	54.999	126	19.998	154.998	104.004	10.998	55.998	80	42	35	114	0	82.998	113.004	23.004
tRF#41-8HM2OSRNLNKSEK51B	TCACGCGGGAGACCGGGGTTCGATTCCCCGACGGGGAGCCA	3_tRNA_halve	0	0	263.004	105	0	21.996	0	11.004	27	0	0	9.996	90	202	0	701.01	0	0	0	0
tRF#48-PW5SVP9N15WV7W6SJFV	GCCGTGATCGTATAGTGGTTAGTACTCTGCGTTGTGGCCGCAGCAACC	5_tRF	0	0	0	0	0	0	0	322.002	443.997	243.999	203.004	64.998	0	0	0	148	0	0	0	0
tRF#18-YRRHQFD2	TTCCCGGGCGGCGCACCA	3_tRF	63	28	259	204	159	0	39	67	49	73	0	60	70	38	0	34	0	95	31	152
tRF#22-43RX6NMH3	CTAGTGGTTAGGATTCGGCGCT	i-tRF	589	115	24	22	16	119	0	0	0	26	16	22	24	16	23	21	14	156	90	120
tRF#36-VUY9QZR4L2RRM3E	TATGATTCTCGCTTTGGGTGCGAGAGGTCCCGGGTT	i-tRF	10.998	0	321.998	316.006	0	0	114	0	0	0	0	0	64	265.01	41	249	0	0	0	28.998
tRF#24-SX73V2Y81W	GTCTAGTGGTTAGGATTCGGCGCT	i-tRF	441	53	23	15	73	136	0	0	0	16	0	0	11	21	37	43	0	305	84	128
tRF#20-P4R8YP9L	GCATGGGTGGTTCAGTGGTA	5_tRF	47	10	123	184	92	28	21	0	67	418	28	85	39	26	21	22	28	29	18	94
tRF#29-R8WP9N1EWJI5	GGTGGTCTAGTGGTTAGGATTCGGCGCTC	i-tRF	124	25	0	167	71	0	41	0	0	0	0	0	21	23	0	26	11	482	261	126
tRF#20-73V2Y8L9	GTGGTTAGGATTCGGCGCTC	i-tRF	218	25	206	58	35	46	46	0	0	0	0	0	83	71	35	18	12	198	113	210
tRF#33-QKF1R3WE8RO8DX	GCGGGAGACCGGGGTTCGATTCCCCGACGGGGA	3_tRNA_halve	0	0	0	42.996	10	66.996	0	0	18	54	0	9.996	0	0	0	1171	0	0	0	0
tRF#28-QNR8VP9NFQ9	GCGTTGGTGGTATAGTGGTTAGCATAGC	5_tRF	129	19	111	176	105	38	307	0	0	20	0	0	100	103	39	112	0	25	22	55
tRF#25-RPM830MMUK	GGTAGCGTGGCCGAGCGGTCTAAGG	5_tRF	0	0	65.997	45.999	17.001	306.999	19.998	44.001	18.999	417.996	12.996	24.003	30	61	21	255	0	18	0	0
tRF#29-79MP9P9MH525	GTTTCCGTAGTGTAGTGGTCATCACGTTC	5_tRF	1103	26	83	26	18	0	30	0	0	0	0	0	0	17	0	10	0	0	22	13
tRF#39-EH6KK87SIRM1DVE2	ACGCGGGAGGCCCGGGTTCGATTCCCGGCCAATGCACCA	3_tRNA_halve	170.004	0	40.002	570	12	29.004	63.996	12	0	10.002	0	0	0	0	0	133	0	135	81	87.996
tRF#30-897PVP941QKS	TCCTCGTTAGTATAGTGGTGAGTATCCCCG	5_tRF	99	18	209	174	14	0	43	0	14	89	0	0	99	139	64	30	0	48	55	249
tRF#21-9DH48V7KE	TGGACATATGTCCGCGTGGGT	i-tRF	108	39	114	97	74	0	98	0	0	0	0	0	73	105	37	34	0	100	29	431
tRF#27-6XQ6S8V0JUL	GGCTAGCTCAGTCGGTAGAGCATGAGA	5_tRF	12	0	124.002	177	76.998	256.998	49.002	70.998	57	116.004	13.998	27	45	38	33	186	0	13.998	10.002	31.002
tRF#20-F91SS2P4	AGCTCAGTCGGTAGAGCATG	i-tRF	41	0	233	130	78	55	92	77	46	32	37	10	84	106	41	152	0	31	53	37
tRF#0-		5_tRF	47.272	4.182	86.185	104.398	108.436	262	26.5	202.121	55.555	285.33	9.714	70.075	0	0	0	0	0	24.636	9	27.435
tRF#26-3K7SIR3DR20	CCGGGGTTCGATTCCCCGACGGGGAG	3_tRF	30	0	21	17	15	20	22	0	219	459	32	38	20	43	0	373	0	0	10	0
tRF#21-F91SS2P40	AGCTCAGTCGGTAGAGCATGG	i-tRF	32	11	149	80	23	29	170	0	16	372	0	0	63	73	38	110	0	26	0	120
tRF#20-P4L2RPM2	GCATGCGAGAGGTAGCGGGA	i-tRF	189.002	0	170	46	59	0	58	0	63	136	0	65	51	26	10	0	0	78	12	347
tRF#22-P4R8YP9LL	GCATGGGTGGTTCAGTGGTAGA	5_tRF	40	0	77	89	42	12	28	0	39	686	35	90	15	10	16	71	16	0	0	33
tRF#38-L85DMKYOYRLHR0D2	CGCGGGAGACCGGGGTTCAATTCCCCGACGGGGAGCCA	3_tRNA_halve	214	0	252	490	0	162	22	0	0	0	0	0	0	0	0	81	0	39	0	35
tRF#36-7K7RWFQ9QV70JZE	GTGGGGTTCCTCGCAGCTTCGCTGCGTGAGCATTTT	3_U_tRF	15	0	290	367	0	168	52	0	0	0	0	0	26	163	39	108	0	0	11	53
tRF#33-RKVP4P9L5FZUDP	GGGGGTATAGCTCAGTGGTAGAGCATTTGACTG	5_tRNA_halve	87	0	16	34	0	0	0	0	0	0	0	0	72	0	0	45	0	15	938	82
tRF#51-RPM830MMUKLY5Z1IK34ZD	GGTAGCGTGGCCGAGCGGTCTAAGGCGCTGGATTTAGGCTCCAGTCTCTTC	5_tRF	0	0	21	0	0	0	113	83	20	938	0	0	76	10	14	11	0	0	0	0
tRF#19-VIJNRPE8	TAGCTCAGTTGGTAGAGCG	i-tRF	0	0	0	112	106	153	0	242	22	496	27	67	0	0	0	0	0	10	49	0
tRF#22-W0K672052	TCGAGCCCCAGTGGAACCACCA	3_tRF	15	0	455.001	157.999	203.001	58.999	116.001	0	12	0	0	0	53	24	0	17	0	87	9.999	74.001
tRF#33-S3M8309NDJ58W	GTAGTCGTGGCCGAGTGGTTAAGGCGATGGACT	5_tRF	757	24	0	0	0	0	0	0	0	0	0	0	14	0	0	0	0	0	460	27
tRF#24-RPM830MM2S	GGTAGCGTGGCCGAGCGGTCTAAG	5_tRF	89.001	0	50.004	72.999	23.004	36.999	30.996	33.003	56.997	476.001	0	51.003	71	66	20	93	16.002	44.001	0	37.998
tRF#31-QNR8VP94FQFYD	GCGTTGGTGGTATAGTGGTGAGCATAGCTGC	5_tRF	51	0	271.002	166.002	33	91.998	145.002	12	0	0	0	0	127	67	75	102	0	31.998	24	61.002
tRF#29-3K7SIR3DR2I2	CCGGGGTTCGATTCCCCGACGGGGAGCCA	3_tRF	12.996	0	520.992	111	9.996	26.004	0	33.996	14.004	186.996	0	0	67	77	0	115	11.004	17.004	12	39.996
tRF#24-9N1EWJQ7FV	TGGTTAGGATTCGGCGCTCTCACC	i-tRF	53	32	255	103	44	0	76	0	0	0	0	13	163	133	92	21	0	35	29	205
tRF#21-LNKSEK51B	CGATTCCCCGACGGGGAGCCA	3_tRF	0	0	218.004	47.004	14.004	0	0	72	17.004	301.996	11.004	9.996	137	235	0	40	44.004	51.996	11.004	41.004
tRF#20-XEKJ5R5N	TGAATCCAGCGATCCGAGTT	i-tRF	53	0	710	49	76	0	82	0	0	0	0	0	72	30	18	0	0	43	0	107
tRF#41-KHM26RRNLNK8KEP1B	CCACGCGGGAGGCCCGGGTTCGATTCCCGGCCAATGCACCA	3_tRNA_halve	0	0	127.002	367.998	0	95.004	159	27	25.998	10.002	0	0	70	37	20	251	0	12	24	10.002
tRF#30-P4R8YP9LON4V	GCATGGGTGGTTCAGTGGTAGAATTCTCGC	5_tRF	0	0	120	54	75	0	43	0	134	521	31	71	55	26	23	55	0	14	0	11
tRF#29-MUWLV47PU9J8	CGTGATCGTATAGTGGTTAGTACTCTGCG	5_tRF	59.004	12.996	56.997	77.004	62.001	118.998	35.001	0	140.004	306	20.997	126.999	55	60	11	43	0	25.002	0	18.999
tRF#29-94SX73V2Y81W	TGGTGGTCTAGTGGTTAGGATTCGGCGCT	5_tRF	136	33	99	124	46	30	35	46	0	21	0	12	42	55	62	106	0	228	60	93
tRF#23-QNR8VP9N9	GCGTTGGTGGTATAGTGGTTAGC	5_tRF	333	39	181	219	41	33	63	0	0	0	0	0	64	41	11	41	17	39	22	77
tRF#28-7343RX6NMHD5	GTGGTCTAGTGGTTAGGATTCGGCGCTC	i-tRF	168	13	0	149	38	0	11	0	0	0	0	0	0	0	0	0	0	563	133	144
tRF#49-PW5SVP9N15WV7W6SJFE3	GCCGTGATCGTATAGTGGTTAGTACTCTGCGTTGTGGCCGCAGCAACCT	5_tRF	0	0	0	116.001	0	23.004	18.999	134.001	280.998	251.001	126	48.996	33	13	0	158	0	0	0	0
tRF#36-79MP9P9NH57S36D	GTTTCCGTAGTGTAGTGGTTATCACGTTCGCCTCAC	5_tRNA_halve	137.007	0	30.006	579.996	0	0	61.002	0	0	0	0	0	0	0	0	0	0	322.002	27.999	40.995
tRF#21-Y2R79K3BB	TTAGAGGTCTTGGGGCCGAAA	5_U_tRF	0	0	45	93	147	81	46	0	0	0	0	0	16	91	79	58	0	286	0	240
tRF#20-HJ83925H	ATAGCTCAGTTGGGAGAGCG	i-tRF	0	0	13	175	118	144	0	165	67	199	13	27	10	15	23	40	0	84	58	28
tRF#25-R4VIJ4S2PF	GGGTGTAGCTCAGTGGTAGAGCACA	5_tRF	0	0	10	78	32	18	0	216	76	300	0	42	0	0	26	361	0	0	16	0
tRF#22-WB86N7O52	TCGAATCCCACTTCTGACACCA	3_tRF	0	0	230.998	196.001	50.997	0	84	0	24	199.003	0	107.997	53	55	10	41	0	54.997	0	64.997
tRF#28-MP9P9NH57SD3	CGTAGTGTAGTGGTTATCACGTTCGCCT	i-tRF	162	37	0	201	31	0	0	16	0	25	0	0	0	0	0	0	0	458	196	38
tRF#27-PS5P4PW3FJI	GCCCGGATAGCTCAGTCGGTAGAGCAT	5_tRF	16.002	0	94.998	115.002	42	99.996	36	42	13.998	142.002	0	0	115	56	24	298	0	41.004	0	27
tRF#25-87R8WP9N1E	TCCCTGGTGGTCTAGTGGTTAGGAT	5_tRF	312	57	217	66	0	0	33	0	11	62	0	16	53	52	21	64	11	56	28	98
tRF#25-RKVP4P9L5F	GGGGGTATAGCTCAGTGGTAGAGCA	5_tRF	235	54	60	35	30	31	0	0	0	21	10	0	57	56	40	218	16	0	70	221
tRF#25-9MV47P596V	TGGTCTAGTGGTTAGGATTCGGCGC	i-tRF	438	39	76	104	39	0	13	0	12	0	0	0	32	50	13	31	0	205	17	81
tRF#23-NNBSBKZ3DZ	CTGTTAACCGAAAGGTTGGTGGT	i-tRF	75	21	229	92	136	36	59	0	10	0	0	21	41	28	29	19	0	67	26	257
tRF#35-QNR8VP94FQFY39	GCGTTGGTGGTATAGTGGTGAGCATAGCTGCCTTC	5_tRNA_halve	141	0	37.998	190.002	34.998	21	73.998	0	0	0	15	0	10	31	70	119	0	199.002	145.002	54
tRF#25-P4R8YP9LON	GCATGGGTGGTTCAGTGGTAGAATT	5_tRF	13	0	22	56	47	59	77	25	0	103	0	48	128	30	240	245	0	0	0	48
tRF#33-86V8WPMN1E8Y0E	TCCCATATGGTCTAGCGGTTAGGATTCCTGGTT	5_tRF	437	0	14	18	0	0	23	10	44	25	118	320	12	21	0	0	0	53	26	18
tRF#39-EH623K76IR3DR2I2	ACGCGGGAGACCGGGGTTCAATTCCCCGACGGGGAGCCA	3_tRNA_halve	308	0	36	267	0	32	14	0	0	0	0	0	0	0	0	101	15	242	37	85
tRF#29-QNR8VP9NFQEW	GCGTTGGTGGTATAGTGGTTAGCATAGCT	5_tRF	153	12	120	116	34	0	310	0	11	0	0	17	85	61	39	122	0	12	10	32
tRF#38-QB1MK8YUBS68BFD2	GCGAAAGGTCCCCGGTTCGAAACCGGGCGGAAACACCA	3_tRNA_halve	109.998	0	82.992	662.998	0	28	33.992	0	46.998	0	11.004	13.006	0	0	0	77	0	51.996	14.994	0
tRF#33-897PVP9N1QKSD3	TCCTCGTTAGTATAGTGGTTAGTATCCCCGCCT	5_tRF	766	13	11	79	0	0	0	0	0	0	0	0	0	0	0	179	0	0	84	0
tRF#26-6XQ6S8V0J80	GGCTAGCTCAGTCGGTAGAGCATGGG	5_tRF	18.999	12.999	171.999	179.001	27.999	42.999	74.001	0	0	180	0	27.999	76	119	37	28	0	20.001	0	111
tRF#23-QP4PW3FJD0	GCTAGCTCAGTCGGTAGAGCATG	i-tRF	10	13	71	65	69	172	42	185	36	76	19	13	28	81	24	86	0	40	52	35
tRF#31-F1R3WE8RO86JD	AGACCGGGGTTCGATTCCCCGACGGGGAGCC	3_tRF	503.004	14.004	57.996	107.004	0	27	60	0	14.004	18	11.004	21.996	0	24	0	59	32.004	87	26.004	51.996
tRF#34-79MP9P9MH57S1O	GTTTCCGTAGTGTAGTGGTCATCACGTTCGCCTA	5_tRNA_halve	1003	11	0	0	0	0	0	0	0	0	0	0	0	0	0	0	0	62	37	0
tRF#35-12Z4R95MKM9KX6	AGGGATTGTGGGTTCGAGTCCCATCTGGGGTGCCA	3_tRF	10	0	366	212	0	85	66	0	0	44	0	0	0	16	0	121	0	75	40	74
tRF#23-WP9N1EWJDW	TCTAGTGGTTAGGATTCGGCGCT	i-tRF	267	68	42	26	20	67	18	0	0	14	11	30	59	70	64	22	0	124	64	129
tRF#18-VIJNRXDS	TAGCTCAGTTGGTTAGAG	i-tRF	13	0	0	147	151	196	0	196	38	121	0	36	0	11	40	136	0	10	0	0
tRF#27-WJ9X0UD394N	TCGGCTGTTAACCGAAAGGTTGGTGGT	i-tRF	86	32	170	193	44	57	54	0	13	46	0	0	39	26	22	15	0	25	15	256
tRF#21-VIJNRPFQD	TAGCTCAGTTGGTAGAGCATC	i-tRF	0	0	100	114	73	101	0	105	63	427	0	71	0	0	0	0	0	15	11	11
tRF#37-LSM1M3WE8SSP6D2	CGCCGCGGCCCGGGTTCGATTCCCGGTCAGGGAACCA	3_tRNA_halve	16.002	0	279	398.007	10.998	99	60.993	12.996	42.003	9.999	0	10.998	0	10	0	84.01	0	43.002	0	12.996
tRF#24-RKVP4P9LH9	GGGGGTATAGCTCAGTGGTAGAGC	5_tRF	315	58.002	32	111	37.998	52	15	0	25	22	0	0	36	43	23	106	0	34.002	79	94.002
tRF#38-79MP9P9NH57S36D1	GTTTCCGTAGTGTAGTGGTTATCACGTTCGCCTCACAC	5_tRNA_halve	46.998	0	207	308.997	0	20.997	126	0	11.997	25.002	0	0	14	31.01	40.01	103	0	28.008	11.997	105.993
tRF#27-7EMQ18Y3E7M	GTGATCGTATAGTGGTTAGTACTCTGC	5_tRF	66.996	0	384.003	169.002	102.996	0	59.004	0	18	24.003	16.002	11.997	42	14	22	0	0	41.004	10.998	98.001
tRF#33-R9J89O9NF5W8W	GGTTCCATGGTGTAATGGTTAGCACTCTGGACT	5_tRF	37.002	0	54.999	25.998	52.003	24.997	0	0	0	0	0	0	0	28	0	657	0	147	17.003	35
tRF#20-9N1EWJQ7	TGGTTAGGATTCGGCGCTCT	i-tRF	235	32	124	111	0	0	40	0	0	0	0	0	84	81	23	21	0	80	67	174
tRF#33-34HWH3RXSINH0P	CCGTGATCGTATAGTGGTTAGTACTCTGCGTTG	5_tRNA_halve	26.001	0	89.001	126	30.996	155.997	204.003	0	0	68.004	0	81	19	14	0	105	0	91.998	27	30.996
tRF#33-RKIP4OI3FJQSDQ	GGGGGATTAGCTCAAATGGTAGAGCGCTCGCTT	5_tRF	408	17	0	0	20	0	0	0	0	0	0	0	16	0	0	0	0	184	351	69
tRF#35-JY7383RPD9W1X6	CATTGGTGGTTCAGTGGTAGAATTCTCGCCTGCCA	5_tRNA_halve	112	0	109	250	42	29	65	0	17	30	0	33	14	39	0	83	0	166	39	24
tRF#29-IKE7UMKKSWIZ	ATGGGACTCTTAATCCCAGGGTCGTGGGT	i-tRF	146	24	95	230	44	57	35	23	0	59	0	46	12	20	16	47	0	96	17	83
tRF#25-PSQP4PW3FJ	GCCCGGCTAGCTCAGTCGGTAGAGC	5_tRF	0	0	65.997	9.999	73.998	0	0	416.997	318.996	109.998	0	0	0	0	0	39	0	0	0	12.996
tRF#21-9V881X3SE	TGTGCTCCGGAGTTACCTCGT	3_U_tRF	22	12	72	0	10	0	15	0	125	55	230	329	31	57	20	14	0	0	0	47
tRF#23-86J8WPMNY	TCCCACATGGTCTAGCGGTTAGG	5_tRF	49	17	162	65	0	0	26	40	58	78	78	157	86	95	12	40	0	12	12	51
tRF#50-JY7383RPD9W1X6L85J3K	CATTGGTGGTTCAGTGGTAGAATTCTCGCCTGCCACGCGGGAGGCCCGGG	5_tRF	0	0	0	94.997	0	0	15.001	64.001	17.003	806.001	0	11.998	12	0	0	12	0	0	0	0
tRF#26-R3WE8RO86JD	GGGGTTCGATTCCCCGACGGGGAGCC	3_tRF	306	18	14.004	276	33.996	12	66.996	30	9.996	42.996	14.004	0	0	0	0	92	0	57.996	36.996	18.996
tRF#18-HR0VX6D2	ATCCCACCGCTGCCACCA	3_tRF	0	0	22	162.019	98.01	0	24.002	0	73.997	53.999	52.998	332.002	0	58.99	10	71.01	0	0	0	69.003
tRF#30-QNR8VP9NFQFY	GCGTTGGTGGTATAGTGGTTAGCATAGCTG	5_tRF	84	13	272	154	91	0	88	0	0	0	0	0	49	30	47	31	0	20	17	127
tRF#23-9N1EWJQ7D1	TGGTTAGGATTCGGCGCTCTCAC	i-tRF	66	60	121	85	25	22	49	0	0	0	0	0	132	133	84	23	0	0	11	211
tRF#28-K87SIRMM12V	CCCGGGTTCGATTCCCGGTCAGGGAACC	3_tRF	171	0	117.999	351.999	0	21.996	87.003	0	0	0	0	18	0	0	13	79	0	63.999	70.002	23.004
tRF#23-7673FEWSD3	GTTCAGTGGTAGAATTCTCGCCT	i-tRF	523	45	16	74	32	0	13	0	0	0	0	0	0	0	0	0	0	189	92	30
tRF#22-18YKISQI3	AGTGGTTAGGATTCGGCGCTCT	i-tRF	273	61	29	150	0	0	14	0	0	0	0	0	0	0	0	0	0	248	158	76
tRF#24-PS5P4PW3ES	GCCCGGATAGCTCAGTCGGTAGAG	5_tRF	15	10.998	160.002	19.002	57	94.002	51	0	13.998	94.998	12	18	146	94	37	77	0	78	0	24
tRF#23-QNR8VP949	GCGTTGGTGGTATAGTGGTGAGC	5_tRF	122.003	33.999	166.999	151.998	42	0	73.003	0	0	0	0	0	79	76	31	78	16.002	26.999	46.998	53.998
tRF#36-PW5SVP9N15WV7W0	GCCGTGATCGTATAGTGGTTAGTACTCTGCGTTGTG	5_tRNA_halve	0	0	0	55.998	0	370.998	12.996	0	63.999	187.002	55.998	135	0	0	13	60	0	29.997	0	0
tRF#26-QP4PW3FJI0B	GCTAGCTCAGTCGGTAGAGCATGAGA	i-tRF	0	0	81	157	39	137	44	82	34	0	25	18	20	38	38	212	0	21	21	16
tRF#34-623K7SIR3DR2I2	GGAGACCGGGGTTCGATTCCCCGACGGGGAGCCA	3_tRF	0	0	252	138.996	18.996	51.996	12	12	0	76.008	0	0	20	96	41	157.99	0	15.996	18	72
tRF#22-RKVP4P9LL	GGGGGTATAGCTCAGTGGTAGA	5_tRF	689.997	79.002	17.997	0	0	0	0	0	0	0	0	0	37	12	0	83	0	0	0	63
tRF#20-JMRPFQRD	CAGTCGGTAGAGCATGGGAC	i-tRF	129	26	299	96	32	0	113	0	0	0	0	0	23	17	0	17	0	30	12	187
tRF#21-R4L2RRM3E	GGGTGCGAGAGGTCCCGGGTT	i-tRF	85	34	212	140	30	0	38	0	0	0	0	0	47	148	14	11	0	27	0	194
tRF#50-RPM830MMUKLY5Z1IK34Z	GGTAGCGTGGCCGAGCGGTCTAAGGCGCTGGATTTAGGCTCCAGTCTCTT	5_tRF	0	0	0	0	0	0	86	65	30	750	0	0	44	0	0	0	0	0	0	0
tRF#37-RPFQRDWXHR13M8N	GGTAGAGCATGGGACTCTTAATCCCAGGGTCGTGGGT	i-tRF	89.001	11.001	143.001	240	0	0	51.999	0	12.999	48	0	30	0	40	21	34	0	15	9.999	225.999
tRF#26-79MP9PMNH5B	GTTTCCGTAGTGTAGCGGTTATCACA	5_tRF	515	15	161	61	21	0	55	0	0	0	0	0	38	0	0	10	0	15	61	18
tRF#22-V47P596V5	TAGTGGTTAGGATTCGGCGCTC	i-tRF	187	29	89	104	28	0	44	0	0	47	0	0	24	0	14	0	0	242	92	66
tRF#47-PNR8YP9LON4VN1EH6KJ	GCATTGGTGGTTCAGTGGTAGAATTCTCGCCTGCCACGCGGGAGGCC	5_tRF	0	0	29.001	199.003	0	19.999	0	10.997	80.003	400.001	33.999	72.002	0	24	0	95	0	0	0	0
tRF#22-QNR8VP9NH	GCGTTGGTGGTATAGTGGTTAG	5_tRF	206	36	149	113	51	0	60	0	0	0	0	25	62	58	29	25	0	16	14	116
tRF#28-R4VIJ4S2QH0M	GGGTGTAGCTCAGTGGTAGAGCGCGTGC	5_tRF	129	22.002	94.002	93	0	0	19.002	0	0	0	0	0	82	298	65	17	0	16.002	21	97.998
tRF#37-86V8WPMN1E8Y7Z2	TCCCATATGGTCTAGCGGTTAGGATTCCTGGTTTTCA	5_tRNA_halve	811	0	10	49	0	0	0	0	0	0	0	0	0	0	0	0	0	68	0	13
tRF#22-9X0UD394N	TGTTAACCGAAAGGTTGGTGGT	i-tRF	151	15	171	103	28	40	29	33	20	28	0	0	0	0	0	0	0	37	42	251
tRF#31-PW5SVP9N15WV0	GCCGTGATCGTATAGTGGTTAGTACTCTGCG	5_tRF	24.003	0	43.002	19.998	28.998	90	44.001	36.999	153.999	171	43.002	125.001	18	46	11	52	0	18	18.999	0
tRF#21-941QKS3WD	TGGTGAGTATCCCCGCCTGTC	i-tRF	246	18	123	93	26	0	31	0	0	20	0	0	18	29	0	14	0	197	44	80
tRF#30-HRL7S5QKF1R3	ATCCCCGCCTGTCACGCGGGAGACCGGGGT	i-tRF	0	0	75	55	0	23	21	16	85	430	0	123	11	20	0	33	0	10	0	30
tRF#24-P4R8YP9LH7	GCATGGGTGGTTCAGTGGTAGAAT	5_tRF	45	20	119	151	0	16	51	0	24	101	17	31	39	16	49	84	0	13	12	143
tRF#27-69JMW9RKM8N	GGCTCCAGTCTCTTCGGGGGCGTGGGT	i-tRF	28	10.003	15.001	21	0	98	39.998	29.001	70	218.001	18.998	119	39	49	38	56	0	43.001	0	38.997
tRF#28-9NJ4S2I7L7DV	TGGTTCAGTGGTAGAATTCTCGCCTGCC	i-tRF	25	10	169	109	105	20	90	0	0	0	0	0	47	34	37	24	0	75	36	148
tRF#35-73V2Y8L981PV6R	GTGGTTAGGATTCGGCGCTCTCACCGCCGCGGCCC	i-tRF	26	0	210	232	26	0	23	0	0	0	0	0	51	89	42	40	0	20	0	169
tRF#20-M0NK5Y93	CGGAGCTGGGGATTGTGGGT	i-tRF	172	74	105	65	27	0	60	0	0	0	0	0	34	42	19	0	0	60	48	222
tRF#20-VLV47PVR	TAGTATAGTGGTTAGTATCC	i-tRF	0	0	0	34	89	72	0	347	367	0	0	0	0	0	15	0	0	0	0	0
tRF#27-S3S3RX8HYV3	GTAGTGTAGTGGTTATCACGTTCGCCT	i-tRF	233	54	0	88	0	41	0	0	0	0	0	0	0	0	0	0	0	356	99	48
tRF#22-12RXXNBZQ	AGGGAGGTTATGATTAACTTTT	3_U_tRF	0	0	342	58	29	49	0	0	16	0	32	20	176	115	27	10	0	0	30	10
tRF#30-08R959KUMKF6	ACCGGGGTTCGATTCCCCGACGGGGAGCCA	3_tRF	0	0	333.996	115.992	0	0	0	33.996	14.004	121.008	0	0	37	70	0	106	9.996	21	9.996	41.004
tRF#28-79MP9P9MH50E	GTTTCCGTAGTGTAGTGGTCATCACGTT	5_tRF	431	15	187	65	24	0	66	0	0	25	0	0	18	19	0	18	0	15	10	11
tRF#34-5QKDN6QQ1362HQ	GATATCCAACCTTCAGCTATAGGGTGGAGACTTT	3_U_tRF	0	0	295	36	0	29	26	0	0	0	0	0	59	181	53	205	0	0	0	20
tRF#25-KY7343RX6N	CCCTGGTGGTCTAGTGGTTAGGATT	5_tRF	157	65	226	130	18	0	75	0	0	0	0	0	15	28	0	36	0	74	33	46
tRF#32-RK9P4P9L5FZU3	GGGGGTGTAGCTCAGTGGTAGAGCATTTGACT	5_tRF	0	0	0	0	0	0	0	571	318	0	0	0	0	0	0	14	0	0	0	0
tRF#26-86V8WPMN1EE	TCCCATATGGTCTAGCGGTTAGGATT	5_tRF	486	23	117	37	23	0	38	0	0	0	0	11	18	0	0	19	0	36	50	38
tRF#23-YJIHFKVHDX	TTAGCATGCGAGAGGTAGCGGGA	i-tRF	146	45	113	113	0	0	86	0	17	0	0	0	35	23	12	0	0	64	0	239
tRF#27-PYRP4PW3FJI	GCCTGGGTAGCTCAGTCGGTAGAGCAT	5_tRF	0	0	16	82	34	132	26	198	51	169	29	0	16	18	10	51	0	16	35	10
tRF#21-18YKISQID	AGTGGTTAGGATTCGGCGCTC	i-tRF	171	25	121	80	13	0	32	0	0	0	0	0	37	34	0	11	0	126	120	112
tRF#31-79MP9P9MH57SD	GTTTCCGTAGTGTAGTGGTCATCACGTTCGC	5_tRF	212	0	194	144	53	0	52	0	0	0	0	0	64	14	15	14	0	63	15	41
tRF#24-PW5SVP9NFB	GCCGTGATCGTATAGTGGTTAGTA	5_tRF	18	10.998	11.997	26.001	15.003	390.006	14.004	0	30.997	30.996	0	0	47	32	56	130	0	28.998	15.003	16.002
tRF#23-QR17NSRJ00	GCTCCAGTCTCTTCGGGGGCGTG	i-tRF	17.997	26.999	38.997	21	10.003	36.001	22.001	0	36.001	247.002	21	127.001	67	37	28	30	0	16.002	10.997	70
tRF#22-WKXU53K8N	TCGGGTGCGAGAGGTCCCGGGT	i-tRF	30.999	0	216.999	63	69.999	0	50.001	0	24.999	0	0	0	91	99	17	11	0	33.999	0	153.999
tRF#21-NB8PLML3E	CTGAATCCAGCGATCCGAGTT	i-tRF	25	0	450	133	80	0	66	0	0	0	0	0	32	15	0	0	0	20	0	37
tRF#21-93Q01M3KE	TGGGTGCGAGAGGTCCCGGGT	i-tRF	97.002	63	156	60.002	22.002	0	49.998	0	12	0	0	16.002	72	89	32	17	0	25.002	0	145.998
tRF#20-P8SIYWIZ	GCCGGGTACTTTCGTATTTT	3_U_tRF	19	0	300	10	54	33	48	0	0	0	0	0	236	27	91	20	0	0	16	0
tRF#30-YSV4V47Q2WW1	TTCCGTAGTGTAGTGGTTATCACGTTCGCC	5_tRF	84	0	99	86	62	32	45	0	0	0	0	0	93	51	51	23	0	51	14	162
tRF#20-PSQP4PW3	GCCCGGCTAGCTCAGTCGGT	5_tRF	33.003	0	42.003	32.004	50.999	0	0	0	57.996	371.997	57.996	62.001	23	91	0	28	0	0	0	0
tRF#21-WE8SSP6DD	TCGATTCCCGGTCAGGGAACC	3_tRF	10	0	0	0	0	0	0	0	95	26	69	648	0	0	0	0	0	0	0	0
tRF#28-6XQ6S8V0JUDR	GGCTAGCTCAGTCGGTAGAGCATGAGAC	5_tRF	15	0	121.002	163.998	34.998	67.002	43.002	0	12	18	0	46.998	32	21	30	185	0	21	0	36
tRF#27-3SY3H3RXSMJ	CCTCGTTAGTATAGTGGTTAGTATCCC	5_tRF	0	0	0	96	118	88	0	151	124	132	25	12	0	0	26	42	0	12	19	0
tRF#18-VIJNRP9	TAGCTCAGTTGGTAGAGC	i-tRF	22.002	0	0	0	0	0	0	81.996	0	136.002	0	15	0	0	0	589	0	0	0	0
tRF#31-ZRS3S3RX8HYVD	TTTCCGTAGTGTAGTGGTTATCACGTTCGCC	5_tRF	89	0	172	146	35	0	46	0	0	0	0	0	51	42	27	21	0	50	25	135
tRF#26-PS5P4PW3FJB	GCCCGGATAGCTCAGTCGGTAGAGCA	5_tRF	174	0	91.998	42	27	168.998	18	25.002	16.002	82.998	16.998	60.996	59	22	0	33	0	0	0	0
tRF#25-79MP9P9NH5	GTTTCCGTAGTGTAGTGGTTATCAC	5_tRF	233	28	171	69	13	35	79	0	24	0	0	0	37	19	0	29	0	20	56	23
tRF#24-69JMW9RKH0	GGCTCCAGTCTCTTCGGGGGCGTG	i-tRF	96.999	77	37.002	0	0	37.002	33.999	0	10.997	30.002	0	36.001	130	73	55	55	0	45.997	15.001	91
tRF#21-ZKXU53K80	TTGGGTGCGAGAGGTCCCGGG	i-tRF	21.002	13.998	84	53	0	0	25.002	0	0	0	0	0	119	164	74	18	0	0	0	250.998
tRF#26-79MP9P9NH50	GTTTCCGTAGTGTAGTGGTTATCACG	5_tRF	237	40	169	59	12	0	32	26	10	0	0	10	30	17	12	72	0	17	37	39
tRF#43-3OPP6N7KYUSRHYR4D2	CCTAAGCCAGGGATTGTGGGTTCGAGTCCCATCTGGGGTGCCA	3_tRNA_halve	0	0	94	467	0	89	12	0	0	0	0	0	0	0	0	72	0	29	15	39
tRF#26-6XQ6S8V0JU0	GGCTAGCTCAGTCGGTAGAGCATGAG	5_tRF	0	0	49.002	123	52.998	73.998	22.002	49.998	13.998	193.998	15	0	17	31	27	98	0	0	28.998	19.998
tRF#26-94SX73V2Y8D	TGGTGGTCTAGTGGTTAGGATTCGGC	5_tRF	49	13	178	59	70	31	29	13	0	30	0	0	63	46	45	17	0	27	29	111
tRF#29-PSQP4PW3FJF4	GCCCGGCTAGCTCAGTCGGTAGAGCATGG	5_tRF	0	0	60	27.999	21	47.001	48.999	0	0	339.999	0	0	36	51	12	145	0	0	0	20.001
tRF#31-N3R718YKISQID	CTGGTGGTCTAGTGGTTAGGATTCGGCGCTC	5_tRNA_halve	73	15	0	91	25	0	21	0	0	0	0	0	21	15	20	86	0	298	77	66
tRF#23-3V2VR0PSDZ	CCTGCCACGCGGGAGGCCCGGGT	i-tRF	42	0	216	50	48	0	114	0	18	65	0	23	49	44	11	24	0	21	0	77
tRF#34-7K7RWFQ9QV701E	GTGGGGTTCCTCGCAGCTTCGCTGCGTGAGCATT	3_U_tRF	0	0	94	295	11	15	36	0	0	0	0	0	18	131	65	106	0	0	0	30
tRF#36-S2P46INO86RM7KE	GTAGAGCATGGGACTCTTAATCCCAGGGTCGTGGGT	i-tRF	106	0	154	157	0	0	35	0	0	47	0	22	16	56	12	48	0	0	0	147
tRF#27-5476IR0ZWKK	GAGTGGTTCAATTCCACCTTTCGGGCG	3_tRF	28	0	43	41	0	29	14	20	164	311	54	32	0	12	0	14	0	14	10	14
tRF#21-94SX73V2E	TGGTGGTCTAGTGGTTAGGAT	5_tRF	74	0	162	49	26	0	49	37	0	0	0	0	73	47	43	22	0	47	18	149
tRF#22-RPM830MMO	GGTAGCGTGGCCGAGCGGTCTA	5_tRF	15.003	24.003	0	0	0	0	0	37.998	56.997	199.998	0	70.002	95	57	31	85	16.002	26.001	16.002	64.998
tRF#18-HR6HFRD2	ATCCCGGACGAGCCCCCA	3_tRF	22.008	0	240.009	29.001	35.007	66.003	92.022	0	54.999	59.01	38.997	55.986	0	14.01	0	0	0	42.987	21	22.995
tRF#23-7SIR3DR2DV	GTTCGATTCCCCGACGGGGAGCC	3_tRF	345.996	12.996	0	132	14.004	0	45.996	0	27	0	11.004	17.004	10	26	0	64	12	30	18	26.004
tRF#29-PM8OHP3D7YHQ	GCATCTCCAAATCAGCCGACGTTTGCTTT	3_U_tRF	25	28	81	98	17	56	40	0	0	0	0	0	36	25	24	112	0	0	214	35
tRF#27-9N1EWJQ72SJ	TGGTTAGGATTCGGCGCTCTCACCGCC	i-tRF	75	12	316	61	16	0	37	0	0	0	0	0	62	44	0	17	0	23	0	127
tRF#21-09F0S9EZE	ACCTCAGAAGGTCTCACTTTT	3_U_tRF	0	0	357	24	42	0	43	0	0	0	0	0	159	76	22	20	0	16	0	31
tRF#31-I89NJ4S2I7L70	ATTGGTGGTTCAGTGGTAGAATTCTCGCCTG	5_tRNA_halve	0	0	14	105	61	83	42	0	40	35	0	92	10	25	50	88	0	98	30	13
tRF#19-12RXXN0W	AGGGAGGTTATGATTAACT	3_U_tRF	0	0	0	0	16	0	0	0	273	28	271	197	0	0	0	0	0	0	0	0
tRF#20-RKVP4P9L	GGGGGTATAGCTCAGTGGTA	5_tRF	682.003	31.003	0	0	0	0	0	0	0	0	0	0	0	0	0	0	0	19.999	26.999	22.001
tRF#29-R3SJ83RPFV2M	GGGGTGTAGCTCAGTGGTAGAGCGCGTGC	5_tRF	49.998	25.002	58.998	183	0	0	19.002	0	0	0	0	0	55	226	77	0	0	0	34.002	52.998
tRF#22-S3RX8HYV3	GTAGTGGTTATCACGTTCGCCT	i-tRF	380	42	0	44	19	41	0	0	0	0	0	0	0	0	0	0	0	127	96	28
tRF#22-3OPP6N7KQ	CCTAAGCCAGGGATTGTGGGTT	i-tRF	105	65	70	83	15	92	11	15	0	0	0	0	10	26	0	0	0	30	60	194
tRF#35-897PVP9N1QKS3W	TCCTCGTTAGTATAGTGGTTAGTATCCCCGCCTGT	5_tRNA_halve	174	18	14	147	0	19	0	0	0	0	0	11	0	14	13	243	0	35	32	56
tRF#23-79MP9PMNDD	GTTTCCGTAGTGTAGCGGTTATC	5_tRF	315	24	123	66	55	0	53	0	0	0	0	0	21	13	0	0	0	34	56	15
tRF#25-46S9Y8RH93	CTCCAGTCTCTTCGGGGGCGTGGGT	i-tRF	0	0	31.003	40.999	10.003	94.003	0	0	24.997	372.001	0	16.002	24	28	17	77	0	24.003	0	12.999
tRF#23-RPM830MM0F	GGTAGCGTGGCCGAGCGGTCTAA	5_tRF	0	0	26.001	69.003	0	396.999	10.998	0	0	74.997	0	0	52	30	14	60	0	19.998	0	18
tRF#34-RPM8309MUKLYIE	GGTAGCGTGGCCGAGTGGTCTAAGGCGCTGGATT	5_tRF	266	19	151	113	0	13	15	0	0	0	0	0	11	33	0	21	0	41	28	58
tRF#50-897PVP941QKS3W2VR008	TCCTCGTTAGTATAGTGGTGAGTATCCCCGCCTGTCACGCGGGAGACCGG	5_tRF	0	0	14	67	0	10	72	44	12	311	11	0	140	11	23	50	0	0	0	0
tRF#32-389MV47P596V5	CCTGGTGGTCTAGTGGTTAGGATTCGGCGCTC	5_tRNA_halve	95	0	14	121	18	0	10	0	0	0	0	0	15	18	22	50	0	266	86	48
tRF#36-S4I7LZ93Q01M3KE	GTATGATTCTCGCTTTGGGTGCGAGAGGTCCCGGGT	i-tRF	16.998	0	223.994	156	0	31.002	112.998	0	0	0	0	0	10	76	0	79	0	0	0	55.998
tRF#20-RPM830MM	GGTAGCGTGGCCGAGCGGTC	5_tRF	44.001	18	54	0	12.996	366.003	9.999	0	39.996	33.003	16.002	14.004	14	44	0	36	0	19.998	28.998	9.999
tRF#31-7EMQ18Y3E7QN0	GTGATCGTATAGTGGTTAGTACTCTGCGTTG	5_tRNA_halve	19.998	12.996	19.998	118.998	51.003	18	131.004	0	0	63.999	0	80.001	11	10	0	54	0	120.996	18	29.997
tRF#33-7RH3S3RX8HWV0Q	GTTCCATAGTGTAGTGGTTATCACGTCTGCTTT	5_tRNA_halve	46	0	11	216	28	0	14	0	0	0	0	0	10	0	0	26	0	243	145	17
tRF#22-M4O1XQ9NQ	CGGTGGAACCTGCATTGGTTTT	3_U_tRF	350	25	100	63	0	0	36	0	0	0	0	0	0	0	0	0	0	34	93	53
tRF#29-XMSL73VL4YHE	TGATCGTATAGTGGTTAGTACTCTGCGTT	5_tRF	271.998	24.003	0	54	17.001	119.997	17.001	27	26.001	0	0	11.997	0	0	0	0	0	91.998	48.996	43.002
tRF#20-RX6NMH49	GGTTAGGATTCGGCGCTCTC	i-tRF	474	46	0	47	14	0	15	0	0	0	0	0	0	0	0	0	0	73	32	50
tRF#33-QNR8VP9NFQFYD3	GCGTTGGTGGTATAGTGGTTAGCATAGCTGCCT	5_tRF	556	13	14	69	0	0	0	0	0	0	0	0	0	0	0	0	0	49	37	11
tRF#28-R9JP9P9NH50D	GGTTCCATAGTGTAGTGGTTATCACGTC	5_tRF	187	0	278	67	42	0	64	0	0	0	0	0	36	0	0	14	0	33	13	14
tRF#22-79MP9P9NI	GTTTCCGTAGTGTAGTGGTTAT	5_tRF	207	67	115	66	27	0	36	0	0	0	0	0	43	18	34	23	0	29	15	67
tRF#21-3ZW0HI7ZE	CCTTTTCGAGATACTGTTTTT	3_U_tRF	29	10	473	32	0	0	63	0	0	0	0	0	38	27	0	13	0	0	51	11
tRF#23-YUYRLHR0D2	TTCGATTCCCCGACGGGGAGCCA	3_tRF	0	0	236.004	60	0	0	0	38.004	14.004	147	0	0	55	77	0	55	0	23.004	14.004	26.004
tRF#27-93W086W8RV2	TGGGTTCGAGTCCCATCTGGGGTGCCA	3_tRF	0	0	79	201	27	36	13	90	0	201	0	0	0	0	0	0	0	0	42	54
tRF#21-J09N2NK1E	CAGAGTGGTTCAATTCCACCT	i-tRF	80	18	0	0	0	0	0	0	201	177	173	93	0	0	0	0	0	0	0	0
tRF#25-QP4PW3FJI0	GCTAGCTCAGTCGGTAGAGCATGAG	i-tRF	0	0	53	77	50	36	14	61	26	160	0	0	18	24	17	173	0	10	0	22
tRF#22-YUYRLHR0J	TTCGATTCCCCGACGGGGAGCC	3_tRF	298.004	9.996	15	140.004	0	0	60	0	18	15.996	0	14.004	0	12	0	75	0	47.004	12.996	20.004
tRF#24-S9E77VKKH4	GTCTCACTCTGTTGCCCAGGCTGG	3_U_tRF	0	0	0	14	0	70	0	0	56	105	140	352	0	0	0	0	0	0	0	0
tRF#23-R9JP9P9NDD	GGTTCCATAGTGTAGTGGTTATC	5_tRF	168.999	21.999	248.001	54	26.001	0	42	0	0	0	0	0	30	19	0	25	0	32.001	30.999	38.001
tRF#28-7EMQ18Y3E7D8	GTGATCGTATAGTGGTTAGTACTCTGCG	5_tRF	33.003	0	34.002	27	24.003	12.996	66.996	0	120.996	125.001	18.999	97.002	47	29	22	17	0	14.004	19.998	25.002
tRF#20-YDLBRY73	TTAACCGAAAGGTTGGTGGT	i-tRF	42	12	146	136	96	0	119	0	0	0	18	35	33	12	0	0	0	25	0	59
tRF#28-34HWH3RXSIDP	CCGTGATCGTATAGTGGTTAGTACTCTG	5_tRF	53.001	24.003	36	20.997	54	64.998	114.003	0	0	12.996	0	54.999	37	21	45	58	0	68.004	17.001	51.003
tRF#50-I89NJ4S2I7L7P5QK11M3	ATTGGTGGTTCAGTGGTAGAATTCTCGCCTGCCACGCGGGAGGCCCGGGT	5_tRF	0	0	0	102.998	0	10.003	0	35	18.998	553	0	0	0	0	0	11	0	0	0	0
tRF#21-RKVP4P9L0	GGGGGTATAGCTCAGTGGTAG	5_tRF	452.998	30.002	0	42	0	0	0	0	0	0	0	0	0	10	0	70	0	16.002	56	51.002
tRF#26-R718YKISQID	GGTCTAGTGGTTAGGATTCGGCGCTC	i-tRF	106	12	13	46	18	0	15	0	0	0	0	0	0	14	11	13	0	237	135	105
tRF#38-941QKS3W2VR008DZ	TGGTGAGTATCCCCGCCTGTCACGCGGGAGACCGGGGT	i-tRF	31	0	157	143	0	43	25	0	18	102	0	24	14	22	0	17	0	14	0	114
tRF#24-MKYUYRLHIX	CGGGGTTCGATTCCCCGACGGGGA	3_tRF	45.996	9.996	0	64.996	15	17.004	0	0	87.004	127.996	0	0	12	48	0	249	0	11.004	26	9.996
tRF#29-7343RX6NMHH3	GTGGTCTAGTGGTTAGGATTCGGCGCTCT	i-tRF	210	0	0	116	33	0	0	0	0	0	0	0	0	0	0	0	0	277	43	40
tRF#39-K76KM87SDR29NDE2	CCCCTGGAGGCGTGGGTTCGAATCCCACTCCTGACACCA	3_tRF	44.002	0	280.002	185.003	0	0	45.003	0	0	0	0	0	0	0	0	62	0	25.998	31.003	43.001
tRF#19-RV50SRIZ	GGTGCGAGAGGTCCCGGGT	i-tRF	70	0	121	34	17	0	27	0	0	0	0	0	118	158	42	13	0	0	0	116
tRF#21-73FEWS3VD	GTGGTAGAATTCTCGCCTGCC	i-tRF	31	17	185	72	51	0	87	0	0	17	0	0	41	40	0	19	0	81	11	60
tRF#30-Z4R95MKM9KX6	TTGTGGGTTCGAGTCCCATCTGGGGTGCCA	3_tRF	0	10	117	225	34	36	16	68	0	91	0	0	0	0	0	0	0	0	34	80
tRF#23-3K7SIR3DDY	CCGGGGTTCGATTCCCCGACGGG	i-tRF	200	22	67	48	33	23	119	0	0	0	0	0	11	10	16	96	0	30	13	23
tRF#27-RVULE1D3L8N	GGTGCTAATAACGCCAAGGTCGCGGGT	i-tRF	33	17	180	43	14	38	48	0	0	0	0	0	105	70	15	26	0	15	0	102
tRF#22-RPM8309MO	GGTAGCGTGGCCGAGTGGTCTA	5_tRF	35	0	87	53	65	154	37	34	13	28	0	0	42	30	14	27	0	16	0	71
tRF#24-F91SS2P4ER	AGCTCAGTCGGTAGAGCATGAGAC	i-tRF	17	0	151	142	30	14	34	0	11	21	0	64	47	41	28	53	0	13	12	22
tRF#20-Y2R79K3B	TTAGAGGTCTTGGGGCCGAA	5_U_tRF	0	0	0	33	78	99	15	0	0	76	0	0	0	0	65	36	0	129	0	169
tRF#39-0VL8K87SIRMM12E2	ACCGCCGCGGCCCGGGTTCGATTCCCGGTCAGGGAACCA	3_tRNA_halve	30.996	0	18	408.006	0	15.003	15.003	0	0	0	0	0	0	0	0	0	0	160.002	0	48.996
tRF#21-WE8S68L5D	TCGATTCCCGGGCGGCGCACC	3_tRF	0	0	41	21	28	0	0	0	154	84	79	260	0	0	0	0	0	0	0	29
tRF#28-1Q18X3HRL70D	AGTATAGTGGTGAGTATCCCCGCCTGTC	i-tRF	95	20	0	42	0	22	12	0	0	0	0	0	0	0	0	0	0	208	280	15
tRF#20-59KUMKF6	GATTCCCCGACGGGGAGCCA	3_tRF	0	11.004	231	68.004	11.004	0	48.996	69.996	0	0	0	0	60	76	0	0	21.996	36.996	12	38.004
tRF#22-SP5830MMO	GTCAGGATGGCCGAGCGGTCTA	5_tRF	91.998	12.996	127.998	111.996	11.997	0	37.998	0	9.999	27	0	0	45	35	21	22	0	24.003	0	106.002
tRF#23-9MV47P59D9	TGGTCTAGTGGTTAGGATTCGGC	i-tRF	199	16	164	70	23	39	53	0	0	14	18	0	0	0	0	0	0	29	10	47
tRF#33-87R8WP9I1EWJDW	TCCCTGGTGGTCTAGTGGCTAGGATTCGGCGCT	5_tRF	505	0	35	13	0	41	11	0	0	0	0	0	0	0	19	33	0	12	0	13
tRF#22-S3M8309NF	GTAGTCGTGGCCGAGTGGTTAA	5_tRF	56	28	135	86	34	0	13	17	0	133	0	0	47	31	15	0	0	23	11	51
tRF#25-F91SS2P4FI	AGCTCAGTCGGTAGAGCATGAGACT	i-tRF	58.002	0	31.997	42	42	102.998	10.003	0	0	0	0	0	44	26	40	231	0	31.003	0	19.999
tRF#23-Z8SSFK8SDZ	TTTGGGTCCGAGAGGTCCCGGGT	i-tRF	20	0	208	64	27	0	35	0	0	0	0	0	49	58	26	0	0	11	14	165
tRF#39-79MP9P9NH57S36F8	GTTTCCGTAGTGTAGTGGTTATCACGTTCGCCTCACACG	5_tRNA_halve	192.006	0	65.997	171	0	0	79.002	0	0	0	0	0	0	19	0	113	0	10.998	0	23.994
tRF#23-18YKISQID5	AGTGGTTAGGATTCGGCGCTCTC	i-tRF	445	28	12	96	0	0	0	0	0	0	0	0	0	0	0	0	0	52	25	16
tRF#23-3W2VR008DZ	CCTGTCACGCGGGAGACCGGGGT	i-tRF	27	0	97	40	13	0	83	0	0	0	0	0	137	101	11	19	0	36	12	95
tRF#24-7SIR3DR2I2	GTTCGATTCCCCGACGGGGAGCCA	3_tRF	0	11.004	211.996	104.004	0	27	0	15	0	12	0	0	39	87	0	64	0	33.996	26.004	39.996
tRF#29-Q1Q89P9L84FS	GCGCCGCTGGTGTAGTGGTATCATGCAAG	5_tRF	13	0	33	0	14	30	30	0	0	492	0	0	16	32	0	10	0	0	0	0
tRF#23-1S91547OD9	AGTCGTGGCCGAGTGGTTAAGGC	5_tRF	0	10	0	52	75	126	0	98	45	54	0	0	0	0	0	183	0	0	17	10
tRF#31-34HWH3RXSINHE	CCGTGATCGTATAGTGGTTAGTACTCTGCGT	5_tRF	162	17.001	19.998	45.999	10.998	78.003	29.997	0	0	0	0	10.998	22	64	17	41	0	86.004	41.004	23.004
tRF#23-YDLBRY730K	TTAACCGAAAGGTTGGTGGTTCG	i-tRF	210	11	32	32	18	0	34	0	0	0	0	0	143	10	51	0	0	39	20	65
tRF#22-8LHYD3MUN	TCATAATCTGAAGGTCGTGAGT	i-tRF	27	13	68	99	31	0	44	19	0	0	0	0	29	64	51	12	0	69	10	129
tRF#21-VLV47PVRD	TAGTATAGTGGTTAGTATCCC	i-tRF	0	0	0	0	0	0	0	439	211	15	0	0	0	0	0	0	0	0	0	0
tRF#28-5SVP9N15WV0E	GATCGTATAGTGGTTAGTACTCTGCGTT	i-tRF	135	19.998	11.997	92.997	29.997	141.003	0	0	9.999	0	0	20.997	23	0	0	15	0	136.998	27.999	0
tRF#20-WR381H93	TCTCCCCTGGAGGCGTGGGT	i-tRF	14	0	45	50	55	27	55	0	50.004	83.001	10	37.997	24	24	0	12	0	109	0	68
tRF#48-PNR8YP9LON4VN1EH6KDJ	GCATTGGTGGTTCAGTGGTAGAATTCTCGCCTGCCACGCGGGAGGCCC	5_tRF	0	0	0	60.998	0	0	16.002	0	14	492.996	0	0	19	0	0	61	0	0	0	0
tRF#32-MUWLV47PU9XWP	CGTGATCGTATAGTGGTTAGTACTCTGCGTTG	5_tRNA_halve	0	0	14.004	77.004	27	99	75.996	0	45	36.999	11.997	108.999	0	11	13	55	0	56.997	14.004	16.002
tRF#21-9O0PRMQ0E	TGTAAACCAGGGGTCGCGAGT	i-tRF	78	28	89	41	60	0	63	0	0	0	0	0	49	34	29	21	0	19	25	121
tRF#25-6XQ6S8V0J8	GGCTAGCTCAGTCGGTAGAGCATGG	5_tRF	0	0	48.999	27	30.999	0	50.001	0	12	302.001	0	27	21	40	0	76	0	0	0	20.001
tRF#35-90Q4R9OMKI3U26	TGGAGGCGTGGGTTCGAATCCCACTCCTGACACCA	3_tRF	42	0	311.003	77	0	17.003	66.003	0	0	0	0	0	0	0	0	30	0	29.001	36.001	45.997
tRF#27-RDWXHR13M8N	GGGACTCTTAATCCCAGGGTCGTGGGT	i-tRF	27	0	96	169	78	0	45	0	18	0	0	34	10	18	0	10	0	80	19	50
tRF#25-PS5P4PW3FJ	GCCCGGATAGCTCAGTCGGTAGAGC	5_tRF	159	0	70.002	18	16.002	69	22.002	60	30	0	12	85.002	36	32	0	12	0	0	31.998	0
tRF#27-918XF6RE98N	TGGCCTCCTAAGCCAGGGATTGTGGGT	i-tRF	22	15	168	62	17	30	47	0	0	32	0	13	29	15	12	0	0	61	0	129
tRF#27-QP4PW3FJI01	GCTAGCTCAGTCGGTAGAGCATGAGAC	i-tRF	0	0	95	70	21	52	32	0	0	13	0	45	25	27	11	236	0	13	0	12
tRF#23-86N7O5IS0Q	TCCCACTTCTGACACATTCGTTT	3_U_tRF	34	42	29	150	0	0	18	0	0	0	0	0	12	28	12	37	0	0	261	28
tRF#23-V47P596V03	TAGTGGTTAGGATTCGGCGCTCT	i-tRF	169	42	42	49	16	31	18	0	0	0	0	0	0	0	0	0	0	134	107	42
tRF#20-HENBRSX3	ATAATCTGAAGGTCGTGAGT	i-tRF	99	20	73	59	127	0	29	0	0	0	0	0	13	16	24	0	0	107	18	63
tRF#32-R9JP9P9NH5SY3	GGTTCCATAGTGTAGTGGTTATCACGTCTGCT	5_tRF	119	0	64	51	78	0	52	0	0	0	0	0	24	21	0	63	0	135	0	39
tRF#23-7EMQ18Y3W	GTGATCGTATAGTGGTTAGTACT	5_tRF	190.998	24.003	30.996	54.999	50.004	0	26.001	0	88.002	14.004	0	18	39	0	18	26	0	20.997	15.003	28.998
tRF#25-N44S5N097Z	CTGTGCTCCGGAGTTACCTCGTTTT	3_U_tRF	15	0	316	93	0	0	67	0	0	0	0	0	50	74	0	28	0	0	0	0
tRF#30-LBLM8D4N4OEZ	CGAAACGATCTCAACCTATTCTCAAACTTT	5_U_tRF	20	0	347	129	24	0	56	0	21	0	0	0	10	12	13	10	0	0	0	0
tRF#21-WR381H93E	TCTCCCCTGGAGGCGTGGGTT	i-tRF	0	14	42	21	11	34	79	17	105.002	30.996	73.998	99.001	25	43	0	11	0	13	0	21
tRF#30-QSZ34KRQ59WI	GCTCGTTGGTCTAGGGGTATGATTCTCGCT	5_tRF	0	0	62	0	14	0	14	0	0	0	0	0	137	261	84	33	0	0	19	12
tRF#23-PSQP4PW3X	GCCCGGCTAGCTCAGTCGGTAGA	5_tRF	97.002	0	196.002	0	14.004	0	21.996	0	0	32.004	0	28.998	47	54	0	48	9.999	33.003	0	52.002
tRF#20-RPM8309M	GGTAGCGTGGCCGAGTGGTC	5_tRF	28	0	11	10	23	397	0	0	0	30	0	0	23	19	12	43	0	13	12	12
tRF#26-V4V47Q2WW1E	TAGTGTAGTGGTTATCACGTTCGCCT	i-tRF	223	52	0	76	18	0	0	0	0	0	0	0	0	0	0	0	0	156	88	19
tRF#27-476YQSL4WWQ	CTCCTGGCTGGCTCGCGATGTCTGTTT	3_U_tRF	100	51	28	142	0	72	10	0	0	0	0	0	14	23	33	41	0	0	96	21
tRF#26-RPM8309MUKD	GGTAGCGTGGCCGAGTGGTCTAAGGC	5_tRF	230	0	61	39	0	64	27	0	14	81	0	0	24	35	0	0	0	24	16	16
tRF#24-R84QPYVM1H	GGTGGCTCATGCCTGTAGTCCCAG	3_U_tRF	102	0	100	0	0	0	0	0	0	45	0	0	16	78	56	0	0	26	11	197
tRF#20-K34ZMKQ4	CCAGTCTCTTCGGGGGCGTG	i-tRF	10.003	50.001	28	61.999	0	0	24.003	0	37.002	47.999	10.997	73.003	82	55	20	47	0	17.997	0	63
tRF#27-MKYUYRLHR0J	CGGGGTTCGATTCCCCGACGGGGAGCC	3_tRF	150.996	0	0	95.004	15.996	32.004	21.996	0	20.004	21.996	0	0	0	21	0	183	0	36.996	12.996	12
tRF#23-V47PU9XW0N	TAGTGGTTAGTACTCTGCGTTGT	i-tRF	277.002	97.002	17.001	46.998	0	0	14.004	0	0	0	0	0	0	0	0	0	0	98.001	42.003	28.998
tRF#24-7L73V6M9I3	GTGTAGTGGTTATCACGTTCGCCT	i-tRF	280	40	0	58	0	0	0	0	0	0	0	0	0	0	0	0	0	136	82	25
tRF#36-VUY9Q9R4L2RRM3E	TATGATTCTCGCTTCGGGTGCGAGAGGTCCCGGGTT	i-tRF	0	0	126.999	155.001	0	0	57.999	0	0	0	0	0	16	108	29	115	0	0	0	11.001
tRF#30-JY7383RPD9W1	CATTGGTGGTTCAGTGGTAGAATTCTCGCC	5_tRF	58	0	15	38	13	31	58	0	24	47	0	0	27	116	23	81	0	63	13	10
tRF#20-947673FE	TGGTGGTTCAGTGGTAGAAT	5_tRF	136.36	31.82	78.18	70	27.27	0	17.27	0	0	0	0	0	0	0	0	0	0	0	38.18	217.27
tRF#25-38NJWHIM9Z	CCTGGCTGGCTCGCGATGTCTGTTT	3_U_tRF	219	74	16	52	0	88	16	0	0	0	0	0	17	11	14	36	0	0	57	12
tRF#51-87R8WP9N1EWJQ72S3HPS0	TCCCTGGTGGTCTAGTGGTTAGGATTCGGCGCTCTCACCGCCGCGGCCCGG	5_tRF	0	0	14	124	0	30	40	46	0	230	0	0	28	0	0	99	0	0	0	0
tRF#21-LIK898O1B	CGACTCCCGGTGTGGGAACCA	3_tRF	10	25	152	48	0	0	43	36	0	0	0	15	91	70	13	15	12	15	16	48
tRF#33-ZRS3S3RX8HYVD5	TTTCCGTAGTGTAGTGGTTATCACGTTCGCCTC	5_tRNA_halve	353.997	0	0	99.999	0	0	0	0	0	0	0	0	0	0	0	0	0	47.997	78.993	27
tRF#22-WB08Q2B52	TCGAAACCGGGCGGAAACACCA	3_tRF	0	0	49	68.995	13	57	15	0	66	110.005	0	200.005	0	0	0	0	0	26	0	0
tRF#20-NB8PLML3	CTGAATCCAGCGATCCGAGT	i-tRF	35	12	177	58	74	0	52	0	0	0	0	0	38	31	11	0	0	41	10	66
tRF#23-4EBV2KWHDZ	CTAATAACGCCAAGGTCGCGGGT	i-tRF	0	0	206	21	20	14	29	0	0	0	0	0	114	76	0	20	0	42	0	58
tRF#24-34HWH3RX21	CCGTGATCGTATAGTGGTTAGTAC	5_tRF	41.004	0	66.996	69.003	36	28.998	18	0	46.998	26.001	0	26.001	10	24	16	21	0	105.003	20.997	43.002
tRF#27-M3WE8S68L52	CGGGTTCGATTCCCGGGCGGCGCACCA	3_tRF	0	0	78	199	23	25	23	26	69	0	0	24	19	22	0	60	0	0	0	27
tRF#22-3K7SIR3D4	CCGGGGTTCGATTCCCCGACGG	i-tRF	319	42	50	13	14	0	12	0	0	0	0	0	0	10	0	26	0	35	40	33
tRF#20-RK9P4P9L	GGGGGTGTAGCTCAGTGGTA	5_tRF	556	16	0	0	0	0	0	0	0	0	0	0	10	12	0	0	0	0	0	0
tRF#27-M3WD8SS46D2	CGGGTTCGACTCCCGGTATGGGAACCA	3_tRF	0	24	113	212	59	21	42	0	0	0	0	0	0	0	0	0	0	18	19	86
tRF#34-RPM830MMUKLYIE	GGTAGCGTGGCCGAGCGGTCTAAGGCGCTGGATT	5_tRF	128.006	0	49.002	111.997	13	0	0	0	0	0	0	0	13	13	0	62	0	164.999	18	20
tRF#23-Q1Q89P9L02	GCGCCGCTGGTGTAGTGGTATCA	5_tRF	196	25	102	77	0	0	28	0	0	0	0	0	25	17	0	19	15	34	25	29
tRF#21-PYXIZW3ZE	GCCTGTGACTTTTGTCCTTTT	3_U_tRF	10	26	129	33	80	0	30	0	0	0	0	0	30	28	0	18	0	108	75	24
tRF#33-YSV4V47Q2WW102	TTCCGTAGTGTAGTGGTTATCACGTTCGCCTCA	5_tRNA_halve	505.998	0	0	58.005	0	0	0	0	0	0	0	0	0	0	0	0	0	25.002	0	0
tRF#22-YJ83MIFJN	TTAGCTCAGTCGGCTAGAGCGT	i-tRF	0	0	0	34	210	100	0	103	34	79	0	10	0	0	0	0	0	0	19	0
tRF#23-P4R8YP9LD6	GCATGGGTGGTTCAGTGGTAGAA	5_tRF	13	11	79	73	0	0	28	0	28	85	0	58	19	13	39	45	0	18	10	67
tRF#24-V47P596VJ5	TAGTGGTTAGGATTCGGCGCTCTC	i-tRF	326	28	14	56	0	0	0	0	0	0	0	0	0	0	0	0	0	97	31	31
tRF#24-N3R718YKF5	CTGGTGGTCTAGTGGTTAGGATTC	5_tRF	0	0	10	32	29	0	0	0	0	0	0	0	18	36	0	458	0	0	0	0
tRF#35-389MV47P596VW6	CCTGGTGGTCTAGTGGTTAGGATTCGGCGCTCTCA	5_tRNA_halve	236	0	0	220	21	0	11	0	0	0	0	0	0	0	0	0	0	66	13	15
tRF#28-PSQP4PW3FJD0	GCCCGGCTAGCTCAGTCGGTAGAGCATG	5_tRF	0	0	15.003	12	0	34	10.998	16	11.997	20	0	0	10	10	0	441	0	0	0	0
tRF#21-VNJNRX5HE	TAGTTCAGTTGGTTAGAGCGT	i-tRF	0	0	0	95	11	62	0	41	22	316	14	18	0	0	0	0	0	0	0	0
tRF#32-5DMKYUYRLHR0J	GAGACCGGGGTTCGATTCCCCGACGGGGAGCC	3_tRF	251.004	12	28.992	66	0	0	15.996	0	9.996	0	0	0	0	23	0	58	14.004	56.004	0	42.996
tRF#22-02738E853	ACAGAGTGGTTCAATTCCACCT	i-tRF	21	16	0	0	0	0	0	0	233	83	115	87	0	0	0	0	0	0	22	0
tRF#24-ZH99BMEMIY	TTGCGTGTTCAAATCACGTCGGGG	i-tRF	0	0	0	0	0	0	0	0	15	425	81	56	0	0	0	0	0	0	0	0
tRF#38-L85J3KYUYR66IFD2	CGCGGGAGGCCCGGGTTCGATTCCCGGCCAATGCACCA	3_tRNA_halve	0	0	117	157.002	0	40.998	40.002	15	34.002	28.002	10.002	0	0	11	0	95	0	16.002	10.998	0
tRF#29-7EMQ18Y3E7IN	GTGATCGTATAGTGGTTAGTACTCTGCGT	5_tRF	69.003	15.003	0	77.004	66.996	168.003	0	0	23.004	21.996	0	14.004	15	15	16	22	0	37.998	0	12.996
tRF#30-MUWLV47PU9XW	CGTGATCGTATAGTGGTTAGTACTCTGCGT	5_tRF	87.003	0	0	53.001	43.002	126.999	15.003	17.001	14.004	30.996	0	36.999	13	19	0	32	0	69.003	16.002	0
tRF#25-1W18YMENL7	AGTGTAGTGGTTATCACGTTCGCCT	i-tRF	223	31	0	67	0	0	0	0	0	0	0	0	0	0	0	0	0	171	64	17
tRF#29-R9JP9PMNH523	GGTTCCATAGTGTAGCGGTTATCACGTCT	5_tRF	74	0	97	68	51	31	73	29	10	13	0	0	38	23	27	23	0	0	16	0
tRF#30-8W1W18YMENL7	TCCGTAGTGTAGTGGTTATCACGTTCGCCT	5_tRF	251	13	0	63	15	0	0	0	0	0	0	0	0	0	0	0	0	151	64	14
tRF#31-J8O9YEKPRS93E	CATGGGACTCTTAATCCCAGGGTCGTGGGTT	i-tRF	0	0	48	28	0	291	0	0	0	19	0	0	0	35	14	121	0	11	0	0
tRF#36-RK9P4P9L5HMVYJB	GGGGGTGTAGCTCAGTGGTAGAGCGCGTGCTTAGCA	5_tRNA_halve	393	0	0	48	0	0	0	0	0	0	0	0	0	0	0	21	0	32	47	25
tRF#36-3SY3H3RUSMKVNMB	CCTCGTTAGTATAGTGGTGAGTATCCCCGCCTGTCA	5_tRNA_halve	228	13	10	134	0	0	0	0	0	0	0	0	0	10	0	15	0	99	32	22
tRF#21-7O3B1NR8E	GTTAACCGAAAGGTTGGTGGT	i-tRF	48	12	98	43	57	0	17	0	23	45	0	109	0	0	0	0	0	20	0	91
tRF#50-79MP9PMNH5IS362VO0SR	GTTTCCGTAGTGTAGCGGTTATCACATTCGCCTCACACGCGAAAGGTCCC	5_tRF	0	0	14	92	0	0	115	30	10	242	0	0	26	0	0	34	0	0	0	0
tRF#21-32Q86N7KE	CCGGAGCTGGGGATTGTGGGT	i-tRF	45	21	137	59	0	0	35	0	0	0	0	0	27	26	18	12	0	34	12	134
tRF#32-7EMQ18Y3E7QNN	GTGATCGTATAGTGGTTAGTACTCTGCGTTGT	5_tRNA_halve	111.996	36	0	46.998	30.996	42.003	16.002	0	0	0	0	26.001	0	0	0	0	0	195.003	29.997	25.002
tRF#17-VIJNRPH	TAGCTCAGTTGGTAGAG	i-tRF	0	0	0	20.004	57	37.002	0	63	49.998	304.992	13.002	15	0	0	0	0	0	0	0	0
tRF#33-389MV47P596V03	CCTGGTGGTCTAGTGGTTAGGATTCGGCGCTCT	5_tRNA_halve	118	0	24	135	13	0	0	0	0	0	0	0	0	0	0	29	0	188	39	13
tRF#20-3WOZZMNZ	CCTGTGACTTTTGTCCTTTT	3_U_tRF	32	50	67	26	12	0	44	0	0	0	0	0	28	57	34	12	0	17	86	94
tRF#21-9N1EWJQ7D	TGGTTAGGATTCGGCGCTCTC	i-tRF	320	11	30	40	0	0	22	0	0	0	0	0	0	11	0	0	0	62	13	48
tRF#22-FP18LPMBM	AGCAGAGTGGCGCAGCGGAAGC	5_tRF	387.002	11.997	71.996	31	0	0	15.003	0	0	0	0	0	0	0	0	12	0	0	0	27.999
tRF#30-87R8WP9I1EWJ	TCCCTGGTGGTCTAGTGGCTAGGATTCGGC	5_tRF	198	0	143	33	0	0	38	0	0	0	0	0	47	25	12	30	0	0	0	29
tRF#18-8SRZMFD2	TCCCGGGTTTCGGCACCA	3_tRF	69.993	0	180.999	23.004	42.003	0	65.997	0	0	0	0	0	0	0	0	12	0	62.991	0	97.002
tRF#22-K5YY0FYWQ	CCCACTTCTGACACATTCGTTT	3_U_tRF	28	46	33	80	0	0	32	0	0	0	0	0	19	35	20	25	0	0	221	10
tRF#23-I89NJ4S2DE	ATTGGTGGTTCAGTGGTAGAATT	5_tRF	0	0	10	93	26	0	14	0	201	0	0	30	20	22	39	92	0	0	0	0
tRF#40-2VR0PSR9593J2426	CACGCGGGAGGCCCGGGTTCGATTCCCGGCCAATGCACCA	3_tRNA_halve	0	0	70.998	199.002	0	59.004	27	34.002	16.998	13.002	10.002	0	0	12	0	69	0	0	12	22.002
tRF#26-RK9P4P9L5FD	GGGGGTGTAGCTCAGTGGTAGAGCAC	5_tRF	0	0	0	0	0	0	0	101	53	216	10	48	0	0	23	93	0	0	0	0
tRF#37-WYL1M3WE8S68L52	TCTTGCGACCCGGGTTCGATTCCCGGGCGGCGCACCA	3_tRNA_halve	0	0	103	100	0	29	32	0	0	0	0	0	10	10	0	208	0	23	11	17
tRF#34-R9J89O9NF5W8E5	GGTTCCATGGTGTAATGGTTAGCACTCTGGACTC	5_tRNA_halve	138.999	0	57.001	71.001	10.997	0	23.002	0	0	0	0	0	12	29	15	64	0	82.999	11.998	26.999
tRF#29-FP18LPMBQ4H4	AGCAGAGTGGCGCAGCGGAAGCGTGCTGG	5_tRF	274.995	0	57.006	22.995	44.001	0	16.002	0	10.998	0	0	18	25	0	0	10	0	36.999	12.996	12.996
tRF#20-LNKSEK51	CGATTCCCCGACGGGGAGCC	3_tRF	276.996	0	0	18.996	17.004	0	30.996	0	27	21	53.004	23.004	0	0	0	30	0	26.004	15.996	0
tRF#33-JY7383RPD9W10M	CATTGGTGGTTCAGTGGTAGAATTCTCGCCTGC	5_tRNA_halve	0	0	16	203	14	0	34	0	0	0	0	13	0	0	0	0	0	142	94	22
tRF#28-R718YKISQID5	GGTCTAGTGGTTAGGATTCGGCGCTCTC	i-tRF	191	21	11	83	23	0	15	0	0	0	0	0	0	0	0	0	13	136	25	18
tRF#21-J4S2I7L70	CAGTGGTAGAATTCTCGCCTG	i-tRF	0	16	41	33	47	0	99	0	0	27	0	0	41	42	22	35	0	52	35	44
tRF#30-PS5P4PW3FJHP	GCCCGGATAGCTCAGTCGGTAGAGCATCAG	5_tRF	10.002	0	55.998	40.002	34.998	31.002	16.002	0	0	31.998	0	0	31	32	0	210	0	13.998	0	27
tRF#23-D80L9RQ4DZ	AATGGACATATGTCCGCGTGGGT	i-tRF	0	11	273	36	0	0	50	0	0	0	0	0	43	27	11	19	0	19	0	45
tRF#27-R3WE8RO86J2	GGGGTTCGATTCCCCGACGGGGAGCCA	3_tRF	0	27	110.004	132.996	18	0	0	15.996	0	36.996	0	0	20	33	13	55	0	0	15	54
tRF#22-34HWH3RXN	CCGTGATCGTATAGTGGTTAGT	5_tRF	24.003	17.001	12.996	101.997	0	134.001	0	0	9.999	0	15.003	0	11	28	18	97	0	35.001	0	25.002
tRF#35-5QKDN6QQ1362NZ	GATATCCAACCTTCAGCTATAGGGTGGAGACTTTT	3_U_tRF	0	0	192	26	0	0	12	0	0	0	0	0	23	96	41	128	0	0	0	11
tRF#35-87R8WP9I1EWJQZ	TCCCTGGTGGTCTAGTGGCTAGGATTCGGCGCTTT	5_tRNA_halve	415	0	0	26	0	0	0	0	0	0	0	0	0	0	0	16	0	39	0	24
tRF#21-SBKKRSL3E	GTAAACCAGGGGTCGCGAGTT	i-tRF	87	0	190	35	18	0	29	0	0	0	0	0	51	38	23	0	0	15	0	32
tRF#21-BMFSENXZE	AAATCAGCCGACGTTTGCTTT	3_U_tRF	35	19	64	24	0	12	39	0	0	0	0	0	56	53	71	65	0	0	78	0
tRF#31-87R8WP9I1EWJ0	TCCCTGGTGGTCTAGTGGCTAGGATTCGGCG	5_tRF	74	0	97	95	0	18	28	0	0	0	0	0	51	37	29	65	0	0	0	21
tRF#28-897PVP941QDJ	TCCTCGTTAGTATAGTGGTGAGTATCCC	5_tRF	102	0	66	55	11	34	44	24	0	13	0	14	25	32	23	36	0	0	15	19
tRF#30-3L7L73V6M9P9	CCGTAGTGTAGTGGTTATCACGTTCGCCTC	5_tRNA_halve	110.997	17.001	26.001	188.001	16.002	0	0	0	0	0	0	0	0	0	0	10	0	52.002	54	37.998
tRF#36-9EYK46S9Y8RH93E	TGGATTTAGGCTCCAGTCTCTTCGGGGGCGTGGGTT	i-tRF	117	15	0	42	0	0	39	0	0	45	0	10	18	29	35	42	0	11	0	109
tRF#24-QP4PW3FJF4	GCTAGCTCAGTCGGTAGAGCATGG	i-tRF	0	0	53	0	0	62	54	0	0	210	0	0	23	32	12	48	0	0	0	17
tRF#24-6XQ6S8V010	GGCTAGCTCAGTCGGTAGAGCATG	5_tRF	0	0	27.999	42.003	27	55.998	27	0	25.002	118.998	12.996	21.996	15	57	0	30	0	15.003	24.003	10.998
tRF#25-9NJ4S2I7L7	TGGTTCAGTGGTAGAATTCTCGCCT	i-tRF	200	13	38	20	0	0	15	0	0	0	0	0	0	0	0	81	0	64	45	34
tRF#32-M1M3WE8SSP6D2	CGGCCCGGGTTCGATTCCCGGTCAGGGAACCA	3_tRF	0	0	217.998	93.996	15.003	36.999	59.004	0	0	0	0	0	0	17	0	24	0	10.998	14.004	20.997
tRF#26-SX73V2Y8L9E	GTCTAGTGGTTAGGATTCGGCGCTCT	i-tRF	179	26	0	31	24	0	0	0	0	0	0	0	0	0	0	0	0	178	59	12
tRF#25-SX73V2Y8L9	GTCTAGTGGTTAGGATTCGGCGCTC	i-tRF	173	21	0	0	0	0	15	0	0	0	0	0	0	0	0	0	0	181	90	29
tRF#27-P4R8YP9LON3	GCATGGGTGGTTCAGTGGTAGAATTCT	5_tRF	0	0	0	21	36	20	140	17	23	70	0	17	17	0	88	48	0	0	0	12
tRF#20-897PVP94	TCCTCGTTAGTATAGTGGTG	5_tRF	106	17	118	15	0	0	13	0	0	0	0	0	26	100	0	39	0	0	75	0
tRF#38-87R8WP9N1EWJQ7D1	TCCCTGGTGGTCTAGTGGTTAGGATTCGGCGCTCTCAC	5_tRNA_halve	54	0	41	81	0	27	110	0	0	20	0	0	13	19	21	112	0	11	0	0
tRF#33-WN1Q18X3HRL70D	TCGTTAGTATAGTGGTGAGTATCCCCGCCTGTC	5_tRNA_halve	207	0	0	66	0	0	10	0	0	0	0	0	0	0	0	0	0	133	43	49
tRF#26-8YQ84V5WNNE	TCCTGGCTGGCTCGCGATGTCTGTTT	3_U_tRF	120	50	31	123	0	31	0	0	0	0	0	0	0	15	28	20	0	0	77	13
tRF#35-PS5U8918W8RV1I	GCCCGGATGATCCTCAGTGGTCTGGGGTGCAGGCT	5_tRF	151	0	0	0	0	0	0	0	26	33	131	68	0	18	0	18	0	29	14	19
tRF#30-02738E85N9RH	ACAGAGTGGTTCAATTCCACCTTTCGGGCG	3_tRF	0	0	24	0	0	12	12	0	193	112	101	27	0	0	0	0	0	0	0	25
tRF#22-8EKSP1852	TCAATCCCCGGCACCTCCACCA	3_tRF	0	0	126.75	67.5	0	0	23.25	0	51	194.25	0	41.25	0	0	0	0	0	0	0	0
tRF#26-SL735L8RPYE	GTATAGTGGTGAGTATCCCCGCCTGT	i-tRF	141	23	24	48	15	0	17	0	0	0	0	0	12	15	21	19	0	68	35	65
tRF#28-PS5P4PW3FJDD	GCCCGGATAGCTCAGTCGGTAGAGCATC	5_tRF	90	0	129	19.002	30	0	49.002	0	0	0	0	13	41	44	15	36	0	34.998	0	0
tRF#22-73V2Y8L95	GTGGTTAGGATTCGGCGCTCTC	i-tRF	289	13	17	44	0	0	16	0	0	0	0	0	0	0	0	0	0	66	28	28
tRF#27-JM8LHYD3MUN	CAGTCTCATAATCTGAAGGTCGTGAGT	i-tRF	13	0	75	39	74	0	36	0	0	0	0	0	24	25	17	15	0	80	0	102
tRF#20-3QW6BZUE	CCTATTCTCAAACTTTAAAT	5_U_tRF	55	46	31	53	30	0	28	0	0	0	0	0	16	0	60	17	0	0	107	57
tRF#28-J09HJHOJ7IDY	CAGAGTGGCGCAGCGGAAGCGTGCTGGG	5_tRF	16.002	0	63.999	49.995	25.002	0	19.998	20	21.996	51.003	59.004	146.997	0	0	0	0	0	0	0	26.001
tRF#21-RPM8309ME	GGTAGCGTGGCCGAGTGGTCT	5_tRF	91	15	26	63	25	83	21	0	0	0	0	0	16	25	14	29	0	43	0	45
tRF#20-9VZVEH93	TGTGCTTTGCACGCGTGGGT	i-tRF	11	0	35	32	26	0	84	0	0	0	0	0	21	19	14	13	0	30	0	211
tRF#27-RK9P4P9L5HK	GGGGGTGTAGCTCAGTGGTAGAGCGCG	5_tRF	70.998	10.002	15	24	0	36	10.998	0	0	124.998	10.998	13.002	12	76	18	29	0	0	13.002	31.998
tRF#37-S4I7LZ93Q01M3KQ	GTATGATTCTCGCTTTGGGTGCGAGAGGTCCCGGGTT	i-tRF	0	0	130	137.004	0	0	22.998	0	0	0	0	0	0	101	0	67	0	0	0	34.998
tRF#33-N3R718YKISQID5	CTGGTGGTCTAGTGGTTAGGATTCGGCGCTCTC	5_tRNA_halve	144	13	0	147	18	0	0	0	0	0	0	0	0	0	0	0	0	124	34	12
tRF#30-R8WP9N1EWJQ7	GGTGGTCTAGTGGTTAGGATTCGGCGCTCT	i-tRF	76	11	11	54	14	0	0	0	0	0	0	0	0	0	0	0	0	192	109	22
tRF#34-RE987S1RJ7R3I2	GGGATTGTGGGTTCGAGTCCCATCTGGGGTGCCA	3_tRF	30	0	171	81	0	11	33	0	0	18	0	0	0	0	0	0	0	61	38	45
tRF#34-QNR8VP9NFQFY1Q	GCGTTGGTGGTATAGTGGTTAGCATAGCTGCCTT	5_tRNA_halve	55	0	62	145	24	0	16	0	0	0	0	0	0	0	20	0	0	76	42	46
tRF#19-8O90Q42E	TCCAATGGAGGCGTGGGTT	i-tRF	0	0	86	51	0	0	78	0	11	0	0	12	63	65	38	44	0	0	0	38
tRF#29-1EWJQ72S3HIJ	AGGATTCGGCGCTCTCACCGCCGCGGCCC	i-tRF	13	0	172	66	19	0	28	0	0	0	0	0	45	47	15	30	0	0	0	50
tRF#23-N1EH6KK80E	CTGCCACGCGGGAGGCCCGGGTT	i-tRF	0	0	85	81	29	46	43	0	0	42	0	19	16	26	0	19	0	47	0	32
tRF#25-R8WP9N1EWJ	GGTGGTCTAGTGGTTAGGATTCGGC	i-tRF	74	12	68	96	54	0	20	0	0	0	0	0	17	41	0	22	0	17	15	47
tRF#28-86J8WPMN1E0J	TCCCACATGGTCTAGCGGTTAGGATTCC	5_tRF	131	0	120	19	0	0	49	0	0	0	0	0	49	26	0	10	0	17	43	19
tRF#28-3K76IR3DR2DV	CCGGGGTTCAATTCCCCGACGGGGAGCC	3_tRF	156	0	0	156	0	38	17	0	0	0	10	0	0	10	0	46	0	23	17	10
tRF#26-MI7O3B1NR8E	CGGCTGTTAACCGAAAGGTTGGTGGT	i-tRF	12	0	79	61	12	0	23	0	0	58	0	19	46	17	0	17	0	17	0	120
tRF#24-9MV47P59I8	TGGTCTAGTGGTTAGGATTCGGCG	i-tRF	68	0	70	21	14	24	10	0	13	83	0	40	19	12	15	14	0	51	12	14
tRF#23-R29P4P9LDS	GGGGATGTAGCTCAGTGGTAGAG	5_tRF	23	11	35	53	70	39	0	0	0	0	0	0	35	30	31	119	0	33	0	0
tRF#29-J09N2NK1ZSI8	CAGAGTGGTTCAATTCCACCTTTCGGGCG	3_tRF	12	0	13	19	0	23	0	21	112	222	34	0	0	0	0	0	0	10	0	11
tRF#34-31QJ3KYUYRR6IX	CCGCCGCGGCCCGGGTTCGATTCCCGGTCAGGGA	3_tRNA_halve	0	0	0	108	0	27	14.004	0	83.997	0	43.002	70.002	0	0	0	130	0	0	0	0
tRF#26-R29P4P9L5HD	GGGGATGTAGCTCAGTGGTAGAGCGC	5_tRF	56	22	22	28	46	0	0	0	0	13	0	0	43	109	12	95	0	0	17	12
tRF#33-MUWLV47PU9XW0N	CGTGATCGTATAGTGGTTAGTACTCTGCGTTGT	5_tRNA_halve	86.004	20.997	0	51.003	0	99.999	0	12.996	0	0	11.997	27	0	0	0	0	0	104.004	41.004	17.001
tRF#31-R8WP9N1EWJQ7D	GGTGGTCTAGTGGTTAGGATTCGGCGCTCTC	i-tRF	132	0	0	145	16	0	21	0	0	0	0	0	0	0	0	0	0	99	37	21
tRF#24-RPM8309M2S	GGTAGCGTGGCCGAGTGGTCTAAG	5_tRF	51	0	22	43	19	0	33	0	22	102	0	11	28	38	27	21	0	26	0	28
tRF#28-ZJ47D112Z4DZ	TTGGCCTCCTAAGCCAGGGATTGTGGGT	i-tRF	43	0	174	12	23	0	0	0	0	0	0	0	10	16	0	0	0	34	0	157
tRF#20-S3M8309N	GTAGTCGTGGCCGAGTGGTT	5_tRF	223	13	20	19	10	0	22	0	0	0	0	0	34	45	16	30	0	0	36	0
tRF#24-3K7SIR3DIY	CCGGGGTTCGATTCCCCGACGGGG	3_tRF	103	12	24	0	0	0	13	0	55	191	0	0	0	0	0	56	0	0	0	13
tRF#35-6S7P4PZ3V0M8XX	GGCCGGTTAGCTCAGTTGGTTAGAGCGTGGTGCTA	5_tRNA_halve	194	0	0	0	0	0	0	0	0	0	0	0	15	15	0	10	0	22	195	15
tRF#23-KB8JLHZV0Q	CCAAATCAGCCGACGTTTGCTTT	3_U_tRF	23	35	37	39	0	21	22	0	0	0	0	0	25	36	19	62	0	0	147	0
tRF#30-I89NJ4S2I7L7	ATTGGTGGTTCAGTGGTAGAATTCTCGCCT	5_tRF	71	0	0	59	0	0	0	0	0	15	0	14	0	0	0	0	0	270	36	0
tRF#20-2ZND0NMZ	CACTTCTGACACATTCGTTT	3_U_tRF	86	19	32	94	19	0	12	0	0	0	0	0	0	29	13	14	0	0	146	0
tRF#20-QNR8VP9N	GCGTTGGTGGTATAGTGGTT	5_tRF	134	19	38	81	18	0	11	0	0	0	10	0	34	42	18	0	0	18	19	20
tRF#21-70VR3196D	GTGAGTATCCCCGCCTGTCAC	i-tRF	10	11	56	83	17	0	25	0	0	0	0	0	31	47	35	13	0	35	0	98
tRF#24-PS5U8918JP	GCCCGGATGATCCTCAGTGGTCTG	5_tRF	229	40	0	0	0	0	0	0	32	46	0	0	11	0	0	0	0	26	25	48
tRF#24-MUWLV47P2W	CGTGATCGTATAGTGGTTAGTACT	5_tRF	152.001	17.001	38.997	35.003	0	0	9.999	0	11.997	53.003	0	17.001	22	17	0	17	0	21.996	30.996	11.997
tRF#37-QNR8VP9LFQFY392	GCGTTGGTGGTATAGTGGTAAGCATAGCTGCCTTCCA	5_tRNA_halve	80	0	17	157	23	0	57	0	0	0	0	0	0	0	0	25	0	71	13	12
tRF#40-87R8WP9N1EWJQ72S	TCCCTGGTGGTCTAGTGGTTAGGATTCGGCGCTCTCACCG	5_tRNA_halve	263	0	0	90	0	0	0	0	0	23	0	0	0	12	0	28	0	38	0	0
tRF#35-R9JP9PMNH5SYNX	GGTTCCATAGTGTAGCGGTTATCACGTCTGCTTTA	5_tRNA_halve	99	0	25	198	29	31	0	0	0	0	0	0	0	0	0	0	0	22	50	0
tRF#33-RQ59WIZKXU53DJ	GGTATGATTCTCGCTTTGGGTGCGAGAGGTCCC	i-tRF	10.002	0	109.998	36	0	0	34.998	0	0	0	0	0	22	67	31	13	0	0	0	127.998
tRF#24-SP5830MM2S	GTCAGGATGGCCGAGCGGTCTAAG	5_tRF	113.004	0	73.998	0	0	0	45	0	0	0	0	0	51	27	0	18	0	25.002	0	98.001
tRF#31-8W1W18YMENL7D	TCCGTAGTGTAGTGGTTATCACGTTCGCCTC	5_tRNA_halve	200.997	0	0	81.999	25.002	0	10.998	0	0	0	0	0	0	0	0	0	0	64.998	44.001	23.004
tRF#38-PS5U8918W8RV1I02	GCCCGGATGATCCTCAGTGGTCTGGGGTGCAGGCTTCA	5_tRNA_halve	210	0	13	51	0	0	0	0	0	0	0	0	0	0	0	0	0	98	21	54
tRF#31-QNR8VP9NFQFYD	GCGTTGGTGGTATAGTGGTTAGCATAGCTGC	5_tRF	70	0	88	62	17	0	46	0	0	0	0	0	42	21	12	22	0	43	0	22
tRF#23-SL735L8RDV	GTATAGTGGTGAGTATCCCCGCC	i-tRF	96	0	22	0	0	0	0	32	13	0	0	0	73	152	0	45	0	11	0	0
tRF#24-V470VR31KD	TAGTGGTGAGTATCCCCGCCTGTC	i-tRF	150	0	59	65	0	0	12	0	0	0	0	0	0	0	0	0	0	110	14	32
tRF#30-7343RX6NMH49	GTGGTCTAGTGGTTAGGATTCGGCGCTCTC	i-tRF	193	0	0	70	0	0	0	0	0	0	0	0	0	0	0	0	0	141	17	19
tRF#20-PYXIZW3Z	GCCTGTGACTTTTGTCCTTT	3_U_tRF	22	12	37	71	12	35	21	0	21	0	0	0	0	18	17	26	0	76	49	23
tRF#22-78QHRYUIQ	GTTGGGCGCGGGTTGTAACTTT	3_U_tRF	0	46	0	75	44	73	17	0	0	0	0	0	0	13	33	83	0	12	26	18
tRF#26-18YOY63ZMJ0	AGTGGTTCAATTCCACCTTTCGGGCG	3_tRF	0	0	13	17	0	12	10	0	94	177	32	0	12	19	0	18	0	0	26	10
tRF#37-RPM8309MUKLY5ZH	GGTAGCGTGGCCGAGTGGTCTAAGGCGCTGGATTTAG	5_tRNA_halve	424	0	0	0	0	0	0	0	0	0	0	0	0	0	0	0	0	14	0	0
tRF#21-Z87HFK8S0	TTTGGGTGCGAGAGGTCCCGG	i-tRF	27	0	128.002	22	0	0	20	0	0	0	0	0	71	27	17	0	0	11	0	114
tRF#22-WB8647O52	TCGAATCCCACTCCTGACACCA	3_tRF	0	0	39	0	0	45.997	17.003	25.998	24.997	136.997	0	123.999	0	0	0	0	0	0	10.997	10.003
tRF#26-QNR8VP94FQB	GCGTTGGTGGTATAGTGGTGAGCATA	5_tRF	79.002	0	77	16.002	51.002	47.999	25.998	0	0	0	0	0	52	39	10	22	0	0	0	14
tRF#20-79MP9P9N	GTTTCCGTAGTGTAGTGGTT	5_tRF	242	0	14	24	0	23	0	0	17	0	0	19	16	0	0	18	0	0	46	15
tRF#22-PYXIZW3ZQ	GCCTGTGACTTTTGTCCTTTTT	3_U_tRF	20	10	141	44	35	0	22	0	0	0	0	0	15	25	0	13	0	54	42	13
tRF#22-F91SS2P44	AGCTCAGTCGGTAGAGCATGGG	i-tRF	0	0	121	70	13	31	16	0	0	0	0	0	22	35	0	21	0	21	0	84
tRF#30-PSQP4PW3FJI0	GCCCGGCTAGCTCAGTCGGTAGAGCATGAG	5_tRF	0	0	19.998	28.002	0	16.002	0	44.998	15	25.998	0	31.002	11	0	13	229	0	0	0	0
tRF#31-897PVP941QKSD	TCCTCGTTAGTATAGTGGTGAGTATCCCCGC	5_tRF	47	0	90	50	0	30	18	0	0	11	0	0	54	64	0	13	0	0	11	45
tRF#21-282K63ZNE	CACGGCAAGGGGAGTTTGTTT	3_U_tRF	21	44	21	0	0	0	10	0	0	0	0	0	46	56	62	30	0	0	111	31
tRF#22-U45O6QJ15	TAATGGATAAGGCATCAGCCTC	i-tRF	82	0	11	0	0	93	22	0	0	0	0	0	15	0	24	25	0	63	59	36
tRF#20-PUBUW60X	GCCGAAACGATCTCAACCTA	5_U_tRF	0	0	10	44	12	151	15	0	0	60	0	0	0	0	21	36	0	68	13	0
tRF#26-PYRP4PW3FJB	GCCTGGGTAGCTCAGTCGGTAGAGCA	5_tRF	0	0	0	0	0	0	0	65	0	365	0	0	0	0	0	0	0	0	0	0
tRF#26-34HWH3RXSID	CCGTGATCGTATAGTGGTTAGTACTC	5_tRF	42.003	18	21.996	55.998	10.998	42.003	19.998	51.003	28.998	30.996	0	0	13	0	0	30	0	11.997	43.002	9.999
tRF#27-R8WP9N1EWJM	GGTGGTCTAGTGGTTAGGATTCGGCGC	i-tRF	56	0	15	24	110	0	0	0	0	25	0	0	30	22	10	0	0	71	26	40
tRF#37-Y2R79K3BEE4O3Q5	TTAGAGGTCTTGGGGCCGAAACGATCTCAACCTATTC	5_U_tRF	0	0	0	59	0	106	22	0	0	0	0	0	0	0	0	242	0	0	0	0
tRF#23-Z3R918VB05	TTGGTGGTTCAGTGGTAGAATTC	5_tRF	20	0	46	53	24	0	22	0	36	77	0	16	28	36	14	0	0	19	10	27
tRF#22-W1X6L85JJ	TCGCCTGCCACGCGGGAGGCCC	i-tRF	10	0	55	11	21	0	42	0	0	0	0	0	72	69	19	23	0	49	13	43
tRF#22-8XF6RE98N	TCCTAAGCCAGGGATTGTGGGT	i-tRF	0	0	71	25	38	47	12	0	33	26	14	29	14	13	0	0	0	62	0	42
tRF#35-86V8WPMN1E8Y7Z	TCCCATATGGTCTAGCGGTTAGGATTCCTGGTTTT	5_tRNA_halve	365	0	0	0	0	0	0	0	0	0	0	0	0	0	0	0	0	47	0	12
tRF#27-SX73V2Y8L95	GTCTAGTGGTTAGGATTCGGCGCTCTC	i-tRF	243	13	0	33	11	0	0	0	0	0	0	0	0	0	0	0	0	61	42	18
tRF#27-QNR8VP9NFQH	GCGTTGGTGGTATAGTGGTTAGCATAG	5_tRF	42	14	53	88	35	0	30	0	0	0	0	0	38	21	15	17	0	28	0	39
tRF#31-MXSL735L8RPYE	CGTTAGTATAGTGGTGAGTATCCCCGCCTGT	5_tRNA_halve	54	16	0	42	11	0	11	0	0	0	0	0	13	11	21	14	0	78	77	72
tRF#21-73V2Y8L9E	GTGGTTAGGATTCGGCGCTCT	i-tRF	165	17	23	34	0	0	18	0	0	0	0	0	0	10	0	0	0	85	37	30
tRF#26-93W086W8RVD	TGGGTTCGAGTCCCATCTGGGGTGCC	3_tRF	0	0	0	50	11	0	0	0	205	0	0	141	0	0	0	0	0	0	12	0
tRF#20-RX6N38Z9	GGTTAGGATTCCTGGTTTTC	i-tRF	290	0	0	26	0	0	16	0	0	0	0	0	0	0	0	0	0	68	18	0
tRF#21-WR645J7KE	TCTCCGGATGGAGGCGTGGGT	i-tRF	28	15	27	23	36	49	76	0	0	0	0	0	14	12	18	15	0	39	0	66
tRF#35-R008R959KUMKF6	GGGAGACCGGGGTTCGATTCCCCGACGGGGAGCCA	3_tRF	27	0	78.996	122.004	0	34.008	0	0	12.996	12.996	0	0	0	13	0	70.01	0	33	0	12.996
tRF#36-V470VR3196L85DD	TAGTGGTGAGTATCCCCGCCTGTCACGCGGGAGACC	i-tRF	26	0	356	0	0	0	0	0	0	0	0	0	0	0	0	0	0	0	12	22
tRF#22-86J8WPMNH	TCCCACATGGTCTAGCGGTTAG	5_tRF	67	12	38	10	23	0	0	0	60	0	24	44	58	32	29	0	0	0	0	18
tRF#33-6N7KYUSRHYR4D2	GGATTGTGGGTTCGAGTCCCATCTGGGGTGCCA	3_tRF	10	0	98	87	0	20	0	0	0	12	0	0	0	0	0	15	0	69	53	50
tRF#20-OD5721V9	GAAACGATCTCAACCTATTC	5_U_tRF	0	0	27	82	53	36	38	0	13	27	0	0	32	23	21	28	0	19	0	15
tRF#31-W01KN44VD3YZE	TCGAGAGGGGCTGTGCTCGCAAGGTTTCTTT	3_U_tRF	0	0	179	22	0	0	26	0	0	0	0	0	66	34	39	47	0	0	0	0
tRF#25-QNR8VP9NFQ	GCGTTGGTGGTATAGTGGTTAGCAT	5_tRF	93	10	47	87	17	0	17	0	0	0	0	0	16	20	14	19	0	24	22	26
tRF#26-RNLIK898O1B	GGGTTCGACTCCCGGTGTGGGAACCA	3_tRF	0	0	122	93	18	10	17	0	0	0	0	0	19	37	10	42	0	0	13	27
tRF#34-N6B7SJ97FUJ0JZ	CTTCAAACCTGTAGCTGTCTAGCGACAGAGTGGT	i-tRF	0	0	0	13	0	0	0	0	133	111	24	126	0	0	0	0	0	0	0	0
tRF#21-17NSRJ7KE	AGTCTCTTCGGGGGCGTGGGT	i-tRF	15.001	10.003	19.999	50.001	0	0	15.001	0	45.003	137.998	0	11.998	16	30	16	13	0	0	0	25.998
tRF#22-F91SS2P4H	AGCTCAGTCGGTAGAGCATGAG	i-tRF	0	0	93	36	0	0	27	55	12	0	0	0	21	25	28	84	0	0	0	25
tRF#18-8R6546D2	TCCCCGGCACCTCCACCA	3_tRF	0	0	81.665	25	34.17	0	70	0	19.165	20.835	27.5	60.835	0	14.17	0	33.34	0	0	0	19.165
tRF#22-9N1EWJQ72	TGGTTAGGATTCGGCGCTCTCA	i-tRF	27	0	93	58	0	0	23	0	0	0	0	0	60	22	19	10	0	14	23	56
tRF#21-N113XYWZE	CTGCCAGGGTTGCTGTCTTTT	3_U_tRF	77	25	49	81	0	0	16	0	0	0	0	0	23	29	29	39	0	0	37	0
tRF#29-987S1RJ7R3I2	TGTGGGTTCGAGTCCCATCTGGGGTGCCA	3_tRF	0	0	58	171	16	40	11	18	13	0	0	0	0	0	0	0	0	0	24	53
tRF#21-F91SS2P4B	AGCTCAGTCGGTAGAGCATGA	i-tRF	0	14	43	80	0	0	0	143	10	17	0	32	0	0	13	36	0	0	0	15
tRF#29-MP9P9NH57S15	CGTAGTGTAGTGGTTATCACGTTCGCCTC	i-tRF	78.003	0	0	0	0	0	0	0	0	0	0	0	0	0	0	0	0	184.995	127.998	10.998
tRF#41-V47P596VW631QJ3KE	TAGTGGTTAGGATTCGGCGCTCTCACCGCCGCGGCCCGGGT	i-tRF	0	0	51	259	0	22	0	0	0	29	0	0	0	0	0	0	0	0	0	40
tRF#19-IR3DR2I2	ATTCCCCGACGGGGAGCCA	3_tRF	0	0	0	0	0	0	0	0	0	0	0	0	165	152	19.01	63	0	0	0	0
tRF#29-MXSL735L8RI3	CGTTAGTATAGTGGTGAGTATCCCCGCCT	5_tRF	235	0	0	13	0	0	0	0	0	0	0	0	0	0	0	0	0	14	137	0
tRF#35-9EYK46SQYU9H93	TGGATTTAGGCTCCAGTCATTTCGATGGCGTGGGT	i-tRF	31	0	30	60	0	0	46	0	0	0	0	0	28	31	26	49	0	0	0	98
tRF#21-1S91547O0	AGTCGTGGCCGAGTGGTTAAG	5_tRF	72	11	0	24	14	40	0	0	15	60	0	0	18	22	24	35	0	22	0	41
tRF#31-IWRNL3KQNK71B	ATTGTGGGTTCGAGTCCCATCTGGGGTGCCA	3_tRF	0	0	68	132	10	44	0	25	0	57	0	0	0	13	0	0	0	14	0	34
tRF#27-3KYUYRR6RBJ	CCGGGTTCGATTCCCGGTCAGGGAACC	3_tRF	80.001	0	44.001	91.998	0	27	30.996	0	27	0	0	9.999	0	0	0	34	0	36.999	15.003	0
tRF#22-94SX73V2Q	TGGTGGTCTAGTGGTTAGGATT	5_tRF	58	0	46	62	44	0	26	0	0	0	0	0	32	26	17	16	0	14	24	31
tRF#31-86J8WPMN1E8Y0	TCCCACATGGTCTAGCGGTTAGGATTCCTGG	5_tRF	45	0	111	27	0	0	14	0	0	0	0	0	49	60	31	21	0	16	22	0
tRF#21-V47Q2WW1E	TAGTGGTTATCACGTTCGCCT	i-tRF	160	32	0	0	0	0	0	0	0	0	0	0	0	0	0	0	0	110	68	25
tRF#20-593J2426	GATTCCCGGCCAATGCACCA	3_tRF	0	0	0	0	0	0	0	0	58.002	231	31.998	73.998	0	0	0	0	0	0	0	0
tRF#24-HRE9XFJ92Q	ATCCCACTTCTGACACATTCGTTT	3_U_tRF	20	18	39	93	0	0	14	0	0	0	0	0	14	23	0	27	0	0	146	0
tRF#21-LBLM8D4ND	CGAAACGATCTCAACCTATTC	5_U_tRF	0	0	49	131	18	44	29	0	0	0	0	0	45	20	17	17	0	13	0	10
tRF#28-J7KB8JLHZV0Q	CATCTCCAAATCAGCCGACGTTTGCTTT	3_U_tRF	0	21	57	46	19	0	15	0	0	0	0	0	0	17	24	77	0	0	104	10
tRF#19-S3SJRXJ1	GTAGTGTAGCGGTTATCAC	i-tRF	0	20	55	0	0	95	21	0	18	37	61	0	0	0	0	0	0	14	34	35
tRF#28-1MZKPUBUW6V	AGGTCTTGGGGCCGAAACGATCTCAACC	5_U_tRF	0	0	53	102	28	26	25	0	12	0	0	0	28	28	27	47	0	13	0	0
tRF#23-941QKS3WD1	TGGTGAGTATCCCCGCCTGTCAC	i-tRF	22	0	68	84	32	0	36	0	0	0	0	0	18	20	10	0	0	25	10	63
tRF#27-NMVLBP5E38N	CTGTCTAGTAAACAGGAGATCCTGGGT	i-tRF	11	0	87	33.997	44.002	0	38.001	0	0	39.999	0	0	23	18	0	0	0	12	0	80.002
tRF#22-KY7343RX4	CCCTGGTGGTCTAGTGGTTAGG	5_tRF	15	31	112	49	0	30	17	0	0	0	0	0	0	36	0	36	0	17	12	32
tRF#24-QNR8VP94EU	GCGTTGGTGGTATAGTGGTGAGCA	5_tRF	50.001	0	73.003	44.002	14	0	30.002	0	0	0	0	0	40	32	18	38	0	21	10.003	15.001
tRF#28-PS5U8918W8DZ	GCCCGGATGATCCTCAGTGGTCTGGGGT	5_tRF	135	13	19	19	17	0	19	0	0	55	11	49	0	0	0	0	0	14	20	14
tRF#18-0RER9LD2	ACCCCACTCCTGGTACCA	3_tRF	13	0	105	0	56	0	113	0	0	0	0	0	0	0	0	0	0	31	0	67
tRF#20-73V6M9P9	GTGGTTATCACGTTCGCCTC	i-tRF	206	21	0	15	15	0	10	0	0	0	0	0	0	0	0	0	0	56	59	0
tRF#20-F8DHXY6R	AGCGGAAGCGTGCTGGGCCC	i-tRF	97	0	0	41	0	91	20	0	26	26	32	20	0	0	0	0	0	18	0	11
tRF#22-WB86Q3P92	TCGAATCCCAGCGGTGCCTCCA	3_tRF	0	0	35	0	25	0	10	0	19	138	0	144	0	0	0	0	0	0	0	11
tRF#19-73V2Y81W	GTGGTTAGGATTCGGCGCT	i-tRF	0	10	0	0	0	0	0	0	0	0	0	0	116	70	78	28	0	40	10	30
tRF#18-WE8RO8DX	TCGATTCCCCGACGGGGA	3_tRF	102.996	9.996	0	15	9.996	0	14.004	0	0	20.004	79.004	82	0	18	0	18	0	12	0	0
tRF#31-R9JP9P9NH5SYD	GGTTCCATAGTGTAGTGGTTATCACGTCTGC	5_tRF	20	0	123	75	11	0	28	0	0	0	0	0	21	18	10	34	0	14	0	25
tRF#33-L85DMKYOYRLHDY	CGCGGGAGACCGGGGTTCAATTCCCCGACGGGG	3_tRNA_halve	0	0	0	68	15	142	0	44	40	41	0	0	0	0	0	0	0	0	13	15
tRF#22-P66Y54J4M	GCCCAGGCTGGAGTGCAGTGGC	3_U_tRF	0	0	0	28	21	241	0	0	0	88	0	0	0	0	0	0	0	0	0	0
tRF#18-I958M80E	ATTTCGATGGCGTGGGTT	i-tRF	23	11	0	0	0	0	0	0	0	0	0	0	52	118	106	15	0	0	0	51
tRF#27-MP9P9NH57SJ	CGTAGTGTAGTGGTTATCACGTTCGCC	i-tRF	26	0	71	62	26	31	29	0	0	0	0	0	31	18	11	14	0	39	0	17
tRF#28-S3S3RX8HYVD5	GTAGTGTAGTGGTTATCACGTTCGCCTC	i-tRF	79	11	0	97	41	0	0	0	0	0	0	0	0	0	0	0	0	99	48	0
tRF#21-NKPYNRSZE	CTGGGGCCTGCTTCCGTCTTT	3_U_tRF	11	0	18	108	27	46	17	0	0	41	0	0	10	17	0	29	0	24	27	0
tRF#24-R918VBY9I3	GGTTCAGTGGTAGAATTCTCGCCT	i-tRF	182	11	15	44	0	0	0	0	0	0	0	0	0	0	0	0	0	75	33	14
tRF#26-QP4PW3FJIKB	GCTAGCTCAGTCGGTAGAGCATGGGA	i-tRF	0	0	95	64	13	0	29	0	0	0	0	0	30	15	10	20	0	22	13	63
tRF#20-HJ83ML5F	ATAGCTCAGTCGGTAGAGCA	i-tRF	0	0	0	0	0	0	0	141.001	0	144.991	0	17.997	0	0	0	45	0	0	24.997	0
tRF#30-94SX73V2Y8L9	TGGTGGTCTAGTGGTTAGGATTCGGCGCTC	5_tRNA_halve	32	13	20	40	0	0	14	0	0	0	0	0	0	12	16	0	0	131	69	25
tRF#23-F91SS2P4DX	AGCTCAGTCGGTAGAGCATGGGA	i-tRF	17	11	95	18	33	0	23	0	0	0	0	0	16	24	16	0	0	41	0	78
tRF#21-U45O6QJ1E	TAATGGATAAGGCATCAGCCT	i-tRF	133	12	16	56	19	38	0	0	0	0	0	0	0	0	0	0	0	49	29	20
tRF#27-R718YKISQI3	GGTCTAGTGGTTAGGATTCGGCGCTCT	i-tRF	83	25	0	50	19	0	0	0	0	0	0	0	0	0	0	0	0	126	29	39
tRF#21-R718YKIS0	GGTCTAGTGGTTAGGATTCGG	i-tRF	80	25	23	0	0	0	0	0	0	0	0	0	0	0	0	10	11	84	58	78
tRF#25-43RX6NMH49	CTAGTGGTTAGGATTCGGCGCTCTC	i-tRF	214	12	0	73	0	0	0	0	0	0	0	0	0	0	0	0	0	59	10	0
tRF#32-79MP9PMNH5ISJ	GTTTCCGTAGTGTAGCGGTTATCACATTCGCC	5_tRF	239	0	41	29	0	0	11	0	0	0	0	0	0	10	0	0	0	17	21	0
tRF#26-R8YP9LON4VD	GGTGGTTCAGTGGTAGAATTCTCGCC	i-tRF	0	0	14	11	25	0	32	32	40	15	0	12	30	65	17	44	0	29	0	0
tRF#20-RXSMKVNM	GGTTAGTATCCCCGCCTGTC	i-tRF	100	0	35	37	14	0	23	0	0	0	0	0	0	0	0	0	0	108	19	27
tRF#22-R3LU7SH7K	GGGGTCGCGAGTTCGATCCTCG	i-tRF	0	0	0	10	24	86	0	149	0	62	0	31	0	0	0	0	0	0	0	0
tRF#30-R29P4P9L5HJV	GGGGATGTAGCTCAGTGGTAGAGCGCATGC	5_tRF	16.002	0	68.999	31.003	11.998	0	18.998	0	0	0	0	0	43	98	19	16	0	0	0	37.002
tRF#26-RNL3KQNK71B	GGGTTCGAGTCCCATCTGGGGTGCCA	3_tRF	0	0	95	93	0	13	26	0	0	0	0	0	0	37	11	26	0	21	0	38
tRF#25-RNLNK88KO1	GGGTTCGATTCCCGGTCAGGGAACC	3_tRF	37.998	0	54	118.998	16.002	0	26.001	0	0	0	0	27	0	0	0	21	0	34.002	24.003	0
tRF#20-RHM39ONZ	GGGCGCGGGTTGTAACTTTT	3_U_tRF	0	15	26	35	32	136	0	0	0	0	0	0	0	24	31	20	0	0	30	10
tRF#36-JJ6RRNLIK898O1B	CAGGCGGCCCGGGTTCGACTCCCGGTGTGGGAACCA	3_tRNA_halve	15	0	80	137	0	14	13	0	0	0	0	0	0	22	0	46	0	0	17	15
tRF#27-PS5U8918W84	GCCCGGATGATCCTCAGTGGTCTGGGG	5_tRF	80	12	17	14	0	0	0	0	0	211	0	0	0	0	0	0	0	0	14	10
tRF#23-RK9P4P9LDS	GGGGGTGTAGCTCAGTGGTAGAG	5_tRF	74	0	12	14	14	0	0	0	32	34	0	26	20	25	15	71	0	10	0	10
tRF#28-94SX73V2Y8DM	TGGTGGTCTAGTGGTTAGGATTCGGCGC	5_tRF	34	0	65	51	45	0	12	0	0	0	0	0	21	0	15	17	0	20	14	61
tRF#23-LM8D4N4OW	CGATCTCAACCTATTCTCAAACT	5_U_tRF	20	15	28	98	45	0	16	0	0	14	0	0	17	26	30	30	0	0	0	16
tRF#20-LNK88KO1	CGATTCCCGGTCAGGGAACC	3_tRF	10	0	25	20	0	0	0	0	10	81	0	44	0	97	0	68	0	0	0	0
tRF#29-MIF91SS2P4IR	CGGCTAGCTCAGTCGGTAGAGCATGGGAC	5_tRF	27.999	0	135	51	0	0	24	0	0	0	0	0	23	14	0	14	0	12.999	11.001	42
tRF#35-9Z3L7L73V6M9PX	TGTTTCCGTAGTGTAGTGGTTATCACGTTCGCCTA	5_tRNA_halve	249.999	0	0	0	0	0	0	0	0	0	0	0	0	0	0	0	0	69	24	11.001
tRF#21-MXSL73VLE	CGTTAGTATAGTGGTTAGTAT	5_tRF	0	0	125	22	93	30	11	11	0	19	12	0	0	0	0	0	0	13	18	0
tRF#21-K34ZMKQ40	CCAGTCTCTTCGGGGGCGTGG	i-tRF	12.999	10.003	10.997	0	0	35	0	31.997	14	127.002	0	38.997	21	26	0	11	0	15.001	0	0
tRF#48-34HWH3RXSINHZ4PVFOD3	CCGTGATCGTATAGTGGTTAGTACTCTGCGTTGTGGCCGCAGCAACCT	5_tRF	0	0	0	0	0	0	0	42.003	143.001	62.001	63	28.998	0	0	0	13	0	0	0	0
tRF#28-RK9P4P9L5HDN	GGGGGTGTAGCTCAGTGGTAGAGCGCGT	5_tRF	40.002	0	12	39.996	0	0	0	0	0	54	0	31.998	16	83	25	30	0	0	0	19.998
tRF#25-7EMQ18Y3E7	GTGATCGTATAGTGGTTAGTACTCT	5_tRF	34.002	25.002	12.996	51.003	46.998	0	47.997	0	0	12.996	0	0	18	11	10	27	0	21.996	0	33.003
tRF#34-9EYK46S9Y8RHJY	TGGATTTAGGCTCCAGTCTCTTCGGGGGCGTGGG	i-tRF	0	0	0	0	0	0	0	0	14	300	0	0	0	0	0	0	0	0	0	37
tRF#21-40KK5Y93E	CTAAGCCAGGGATTGTGGGTT	i-tRF	0	0	82	0	64	39	0	0	0	0	16	37	0	0	0	0	0	35	0	77
tRF#21-1E6SF8WO0	AGGATGGCCGAGCGGTCTAAG	5_tRF	19.998	0	19.998	65.002	129.996	0	18.999	0	0	0	0	0	0	0	0	0	0	45	0	51.003
tRF#32-N3R718YKISQI3	CTGGTGGTCTAGTGGTTAGGATTCGGCGCTCT	5_tRNA_halve	39	0	0	41	10	0	16	0	0	0	0	0	0	0	0	0	0	167	55	20
tRF#21-93301M3KE	TGGGTCCGAGAGGTCCCGGGT	i-tRF	0	0	89	50	0	0	12	24	35	0	0	0	30	40	10	0	0	13	0	45
tRF#34-6KM87SDR29NDE2	GGAGGCGTGGGTTCGAATCCCACTCCTGACACCA	3_tRF	18.998	0	161.994	45.003	0	0	46.998	0	0	0	0	0	0	0	0	15	0	22.001	22.001	16.002
tRF#24-QNR8VP9NEU	GCGTTGGTGGTATAGTGGTTAGCA	5_tRF	56	0	94	33	20	0	22	0	0	0	0	0	28	22	25	10	0	0	15	22
tRF#21-02738E85D	ACAGAGTGGTTCAATTCCACC	i-tRF	43	12	0	0	0	0	0	0	99	58	65	18	0	0	0	0	0	26	26	0
tRF#26-SP58309MUKD	GTCAGGATGGCCGAGTGGTCTAAGGC	5_tRF	35	0	42	11	12	0	21	0	0	0	0	0	26	22	0	125	0	29	0	24
tRF#18-YSQSD2D2	TTCCGGCTCGAAGGACCA	3_tRF	0	0	121.002	53.004	0	0	35	0	0	39.998	0	0	43	24	0	16	0	14	0	0
tRF#30-RKVP4P9L5FZU	GGGGGTATAGCTCAGTGGTAGAGCATTTGA	5_tRF	18	10	11	64	33	0	0	29	0	56	0	0	0	10	0	0	0	11	14	90
tRF#50-897PVP9N1QKS3W2VR008	TCCTCGTTAGTATAGTGGTTAGTATCCCCGCCTGTCACGCGGGAGACCGG	5_tRF	0	0	0	25	0	0	15	188	0	81	0	0	14	0	0	23	0	0	0	0
tRF#40-J9ZH0SR9593KMH26	CATTCTTGCGACCCGGGTTCGATTCCCGGGCGGCGCACCA	3_tRNA_halve	0	0	29	51	0	0	31	0	0	0	0	0	0	19	0	195	0	0	0	21
tRF#33-5Z1IK34ZMKQ4DZ	GATTTAGGCTCCAGTCTCTTCGGGGGCGTGGGT	i-tRF	22	0	0	0	0	0	0	0	51	158	0	42	0	16	0	16	0	0	0	39
tRF#49-3L7L73V6M9P90HLBRR14	CCGTAGTGTAGTGGTTATCACGTTCGCCTCACACGCGAAAGGTCCCCGG	5_tRF	0	0	0	137.997	0	44.001	22.995	0	0	83.997	0	0	0	0	0	55.01	0	0	0	0
tRF#24-V4VH7Q2WHM	TAGTGTAGCGGTTATCACGTCTGC	i-tRF	0	0	0	0	0	0	0	22	18	189	0	39	0	0	0	0	0	0	76	0
tRF#26-QSD2NSWWDZE	GCTCGAAGGACTTCGTCTGTAATTTT	3_U_tRF	0	0	19	125	11	0	26	0	0	0	0	0	27	20	48	52	0	0	15	0
tRF#20-WRD81H93	TCTCCAATGGAGGCGTGGGT	i-tRF	16	0	36	19	12	0	74	0	0	0	0	0	30	43	19	30	0	24	0	39
tRF#50-34HWH3RXSINHZ4PVFO3S	CCGTGATCGTATAGTGGTTAGTACTCTGCGTTGTGGCCGCAGCAACCTCG	5_tRF	0	0	0	63.999	0	0	0	54	20.997	159.003	0	9.999	0	0	0	34	0	0	0	0
tRF#21-RK9P4P9L0	GGGGGTGTAGCTCAGTGGTAG	5_tRF	171	11	15	38	0	0	0	0	0	0	0	0	17	18	16	18	0	0	0	37
tRF#30-21V98BNXD8P0	CAACCTATTCTCAAACTTTAAATGGGCAAG	5_U_tRF	93	15	23	45	0	0	17	0	0	63	0	0	14	0	0	17	0	0	0	54
tRF#24-43RX6NMHH3	CTAGTGGTTAGGATTCGGCGCTCT	i-tRF	132	16	0	27	0	0	0	0	0	0	0	0	0	0	0	0	0	115	37	13
tRF#22-7383RPD95	GTGGTTCAGTGGTAGAATTCTC	i-tRF	0	0	0	10	50	24	0	126	128	0	0	0	0	0	0	0	0	0	0	0
tRF#20-W7WK6WRN	TCTCTTCGGGGGCGTGGGTT	i-tRF	63	0	0	25.998	17.997	0	15.001	0	40.999	0	31.003	52.003	0	34	12	12	0	11.998	0	22.001
tRF#20-JY7383RP	CATTGGTGGTTCAGTGGTAG	5_tRF	32	0	50	71	19	41	15	0	0	0	0	0	19	15	0	0	0	22	0	53
tRF#31-F1R38E8RO86JD	AGACCGGGGTTCAATTCCCCGACGGGGAGCC	3_tRF	130	0	10	120	0	0	10	0	0	0	0	18	0	0	0	15	0	23	0	10
tRF#37-RUSMKVNMEH623KN	GGTGAGTATCCCCGCCTGTCACGCGGGAGACCGGGGT	i-tRF	0	0	23	73	0	17	13	0	32	83	0	36	0	10	0	13	0	0	0	35
tRF#30-PM8OHP3D7YNZ	GCATCTCCAAATCAGCCGACGTTTGCTTTT	3_U_tRF	16	17	99	44	0	15	30	0	0	0	0	0	0	18	0	33	0	0	63	0
tRF#50-R9JP9PMNH5SYNX2VF0S7	GGTTCCATAGTGTAGCGGTTATCACGTCTGCTTTACACGCAGAAGGTCCT	5_tRF	0	0	23	145	0	0	78	0	0	0	0	0	37	0	14	37	0	0	0	0
tRF#33-5DMKYOYRLHR0D2	GAGACCGGGGTTCAATTCCCCGACGGGGAGCCA	3_tRF	0	0	225	55	0	0	0	0	0	0	0	0	0	12	0	18	0	0	0	23
tRF#25-86J8WPMN1E	TCCCACATGGTCTAGCGGTTAGGAT	5_tRF	52	0	44	40	0	0	13	0	0	0	0	50	17	28	0	21	0	11	14	41
tRF#26-P4R8YP9LOND	GCATGGGTGGTTCAGTGGTAGAATTC	5_tRF	14	0	31	35	39	0	19	0	26	122	0	33	0	0	0	0	0	0	0	12
tRF#32-5Y93W086W8RV2	GATTGTGGGTTCGAGTCCCATCTGGGGTGCCA	3_tRF	0	0	129	40	0	16	20	10	0	0	0	0	0	0	0	32	0	38	16	29
tRF#22-Y2R79K3B1	TTAGAGGTCTTGGGGCCGAAAC	5_U_tRF	0	0	0	112	24	23	0	0	34	90	0	10	13	0	0	11	0	0	0	12
tRF#20-N1EH6KK8	CTGCCACGCGGGAGGCCCGG	i-tRF	0	0	37	12	0	0	15	0	0	169	0	26	0	25	0	26	0	17	0	0
tRF#21-JOWU1MN0E	CATAATCTGAAGGTCCTGAGT	i-tRF	10	0	70	27	48	0	62	0	0	0	0	0	17	26	16	18	0	0	0	33
tRF#31-D9W1X6L85J3KE	AATTCTCGCCTGCCACGCGGGAGGCCCGGGT	i-tRF	0	0	79	47	15	0	31	12	26	11	0	22	19	28	0	0	0	0	0	36
tRF#20-I89NJ4S2	ATTGGTGGTTCAGTGGTAGA	5_tRF	19	0	14	62	47	0	0	0	15	86	16	0	0	19	0	0	0	15	10	23
tRF#22-I8RZKSLPN	ATTGGGGTTTCCCCGCGCAGGT	i-tRF	0	0	18	0	24.999	38.001	0	0	35.001	153.999	20.001	24.999	0	0	0	0	0	0	0	9.999
tRF#25-8KIJLJR7DJ	TCAGGATGGCCGAGCGGTCTAAGGC	5_tRF	123.003	0	44.001	0	17.001	0	25.002	0	0	0	0	0	16	12	10	0	0	27.999	0	48.996
tRF#22-QVJKZISZQ	GCTGCCAGGGTTGCTGTCTTTT	3_U_tRF	74	23	42	24	0	0	21	0	0	0	0	0	30	44	16	36	0	0	14	0
tRF#28-LBLM8D4N4OW	CGAAACGATCTCAACCTATTCTCAAACT	5_U_tRF	0	0	71	104	10	0	21	0	0	0	0	12	30	12	12	17	0	18	0	17
tRF#29-Y9PYKHM26RIZ	TTCTCGCCTGCCACGCGGGAGGCCCGGGT	i-tRF	0	0	81	36	0	21	42	0	14	0	0	25	12	29	0	18	0	0	0	45
tRF#21-9N1QKS3WD	TGGTTAGTATCCCCGCCTGTC	i-tRF	20	0	97	36	0	0	44	0	0	0	0	0	19	22	0	19	0	16	0	50
tRF#27-789LV470JP3	GTTGGTGGTATAGTGGTGAGCATAGCT	5_tRF	0	0	10.998	49.002	52.002	0	28.002	0	0	0	0	0	26	13	49	83	0	0	10.998	0
tRF#33-941QKS3W2VR0V	TGGTGAGTATCCCCGCCTGTCACGCGGGAGACC	i-tRF	11	0	259	0	0	0	17	0	0	0	0	0	0	0	0	0	0	0	0	35
tRF#20-PZYU559Z	GCCTTTTCGAGATACTGTTT	3_U_tRF	13	0	111	77	0	0	28	0	0	0	0	0	24	31	23	15	0	0	0	0
tRF#22-WB863IP52	TCGAATCCCACCGCTGCCACCA	3_tRF	0	0	37	0	25.002	0	0	0	20.997	185.002	0	53.001	0	0	0	0	0	0	0	0
tRF#21-QVJKZISZE	GCTGCCAGGGTTGCTGTCTTT	3_U_tRF	83	18	28	46	0	0	22	0	0	0	0	0	40	47	12	25	0	0	0	0
tRF#23-MBQ4NKKQR	CGGAAGCGTGCTGGGCCCATAAC	i-tRF	0	0	19.998	0	0	47.997	9.999	0	0	0	141.003	101.997	0	0	0	0	0	0	0	0
tRF#26-9NJ4S2I7L70	TGGTTCAGTGGTAGAATTCTCGCCTG	i-tRF	12	0	77	45	35	0	35	0	0	0	0	0	16	15	11	15	0	10	19	30
tRF#30-OSRN2NKSEK51	GACCGGGGTTCAATTCCCCGACGGGGAGCC	3_tRF	142	11	22	97	0	0	13	0	0	12	0	0	0	0	0	0	0	23	0	0
tRF#20-LM45EKPF	CGATCCTCACACGGGGCACA	3_tRF	10	0	52	15	0	0	29	11	32	111	16	0	0	0	0	0	0	0	0	43
tRF#24-R718YKISIM	GGTCTAGTGGTTAGGATTCGGCGC	i-tRF	92	10	12	24	33	38	0	0	0	0	0	0	14	23	0	0	0	48	0	24
tRF#21-P8SIYWIZE	GCCGGGTACTTTCGTATTTTT	3_U_tRF	13	0	149	12	21	0	27	0	0	0	0	0	63	13	20	0	0	0	0	0
tRF#19-W9RKM82Q	TCTTCGGGGGCGTGGGTTT	i-tRF	19	10	0	19	0	0	0	0	0	0	0	0	21	28	119	41	0	0	0	61
tRF#20-RV50SRRN	GGTGCGAGAGGTCCCGGGTT	i-tRF	40	0	86	31	14	0	0	0	0	0	0	0	11	78	0	0	0	0	0	57
tRF#27-897PVP941QJ	TCCTCGTTAGTATAGTGGTGAGTATCC	5_tRF	106	0	42	24	11	0	12	54	0	14	0	0	11	15	10	0	0	0	0	18
tRF#20-QP4PW3FJ	GCTAGCTCAGTCGGTAGAGC	i-tRF	45	0	48	0	0	50	0	0	0	27	0	12	23	50	0	52	0	10	0	0
tRF#24-86J8WPMNEX	TCCCACATGGTCTAGCGGTTAGGA	5_tRF	67	0	25	10	0	0	12	0	0	0	25	96	14	22	0	0	0	10	16	20
tRF#23-OUR8309NS	GACGAGGTGGCCGAGTGGTTAAG	5_tRF	86.002	35	19.999	38.003	0	50.001	10.003	0	19.999	0	0	12.999	0	0	0	0	0	11.998	0	31.997
tRF#20-V470VR31	TAGTGGTGAGTATCCCCGCC	i-tRF	39	0	70	0	19	40	11	0	0	0	0	0	25	84	0	0	0	16	0	12
tRF#22-6YQSL4WWQ	GGCTGGCTCGCGATGTCTGTTT	3_U_tRF	40	16	40	58	15	39	14	0	0	0	0	0	13	12	15	24	0	0	30	0
tRF#29-PS5U8918W820	GCCCGGATGATCCTCAGTGGTCTGGGGTG	5_tRF	133	13	0	0	0	0	0	0	0	29	0	81	0	0	0	10	0	14	19	15
tRF#22-7673FEWSJ	GTTCAGTGGTAGAATTCTCGCC	i-tRF	109	0	12	0	0	11	26	0	0	0	0	0	24	50	0	45	0	36	0	0
tRF#22-QNR8VP94H	GCGTTGGTGGTATAGTGGTGAG	5_tRF	30.002	12.999	29.001	40.999	11.998	50.001	15.001	0	0	0	0	0	32	13	17	18	0	0	16.002	25.998
tRF#20-QU6P5B87	GCTGAGGCAGGAGAATCCCT	3_U_tRF	43	30	0	12	0	144	0	0	0	0	0	0	0	0	0	0	13	15	30	25
tRF#23-43RX6NMHD5	CTAGTGGTTAGGATTCGGCGCTC	i-tRF	108	0	0	15	0	0	0	0	0	0	0	0	0	0	0	0	0	136	34	17
tRF#25-QP4PW3FJIK	GCTAGCTCAGTCGGTAGAGCATGGG	i-tRF	0	0	92	37	10	17	19	0	0	12	0	0	21	25	14	15	0	21	0	27
tRF#20-HEPURYX3	ATAATGCCGAGGTTGTGAGT	i-tRF	38	12	29	19	40	0	15	0	0	0	0	0	20	24	0	0	0	34	0	79
tRF#21-73VL4YMYE	GTGGTTAGTACTCTGCGTTGT	i-tRF	186.003	34.002	0	0	0	0	9.999	0	0	0	0	0	0	0	0	0	0	64.998	0	14.004
tRF#24-7673FEWS1P	GTTCAGTGGTAGAATTCTCGCCTG	i-tRF	0	0	17	30	35	0	44	0	0	24	11	26	12	0	22	67	0	21	0	0
tRF#34-86J8WPMN1E8Y2Q	TCCCACATGGTCTAGCGGTTAGGATTCCTGGTTT	5_tRNA_halve	119	0	33	22	0	0	0	0	0	0	0	0	0	0	0	12	0	55	53	14
tRF#21-485JXKJ20	CTCGGGAGGCTGAGGCAGGAG	3_U_tRF	33	0	0	0	12	35	0	46	87	82	0	13	0	0	0	0	0	0	0	0
tRF#37-JBRR93W0K672052	CAGAAGGTCCTGGGTTCGAGCCCCAGTGGAACCACCA	3_tRNA_halve	31.998	0	102	141	0	0	12	0	0	0	0	0	0	0	0	11	0	0	0	9.999
tRF#32-IX69JMW9RKM8N	ATTTAGGCTCCAGTCTCTTCGGGGGCGTGGGT	i-tRF	10	0	16	14	0	0	10	0	33	142	0	34	0	12	0	20	0	0	0	16
tRF#25-RW18V6XO59	GGTGTAGTGGTATCATGCAAGATTC	i-tRF	84	13	0	0	0	0	11	0	0	0	0	0	12	0	0	18	0	104	42	22
tRF#20-J09N2NK1	CAGAGTGGTTCAATTCCACC	i-tRF	31	0	0	0	0	0	0	0	34	116	87	27	0	0	0	0	0	10	0	0
tRF#22-LBLM8D4N3	CGAAACGATCTCAACCTATTCT	5_U_tRF	14	10	42	75	22	0	35	0	0	25	0	22	23	11	0	12	0	0	14	0
tRF#24-79MP9P9NF2	GTTTCCGTAGTGTAGTGGTTATCA	5_tRF	130	14	82	24	0	0	0	0	0	0	0	0	0	0	0	0	0	36	0	18
tRF#22-NYDRFU8UN	CTTTGAATCCAGCGATCCGAGT	i-tRF	0	0	48	38	62	0	28	0	0	0	0	0	25	0	0	0	0	30	16	57
tRF#22-WD8SS46D2	TCGACTCCCGGTATGGGAACCA	3_tRF	0	0	78	55	39	0	18	0	0	0	0	0	0	0	0	0	0	34	0	79
tRF#26-69JMW9RKM80	GGCTCCAGTCTCTTCGGGGGCGTGGG	i-tRF	0	0	0	0	0	0	0	0	10.003	244.006	12.999	35	0	0	0	0	0	0	0	0
tRF#39-W3FJIKE7UMKKSWIZ	TCGGTAGAGCATGGGACTCTTAATCCCAGGGTCGTGGGT	i-tRF	24	0	47.001	116.001	0	0	18	0	0	21	0	0	0	10	0	30	0	0	0	36
tRF#21-LNK8KDP1B	CGATTCCCGGCCAACGCACCA	3_tRF	0	0	125	80	12	13	45	0	0	0	0	0	0	0	0	0	0	0	11	16
tRF#22-9DH48V7KQ	TGGACATATGTCCGCGTGGGTT	i-tRF	22	0	93	70	12	0	47	0	0	0	0	0	0	0	0	0	0	10	0	48
tRF#33-QJ3KYUYRR6RBD2	GCGGCCCGGGTTCGATTCCCGGTCAGGGAACCA	3_tRF	0	0	93.996	90.999	15.003	56.997	26.001	0	0	0	0	0	0	0	0	19	0	0	0	0
tRF#33-I89NJ4S2I7L7DV	ATTGGTGGTTCAGTGGTAGAATTCTCGCCTGCC	5_tRNA_halve	19	0	25	95	0	0	16	0	0	0	0	0	0	12	11	23	0	83	0	17
tRF#50-QNR8VP9NFQFY392J1Y0S	GCGTTGGTGGTATAGTGGTTAGCATAGCTGCCTTCCAAGCAGTTGACCCG	5_tRF	0	0	15	115	0	18	70	0	0	31	0	0	26	0	0	26	0	0	0	0
tRF#20-N113XYWZ	CTGCCAGGGTTGCTGTCTTT	3_U_tRF	103	28	20	33	0	0	13	0	0	0	0	0	22	17	11	31	0	0	23	0
tRF#30-I7L7P5QK11M3	ATTCTCGCCTGCCACGCGGGAGGCCCGGGT	i-tRF	0	0	32	33	0	0	21	0	26	137	0	35	0	0	0	0	0	0	0	16
tRF#36-M26RRNLNK8KEP1B	CGGGAGGCCCGGGTTCGATTCCCGGCCAATGCACCA	3_tRNA_halve	0	0	80.004	111	0	10.002	45	0	0	0	0	0	0	0	0	28	0	0	12	13.002
tRF#24-9NJ4S2I71V	TGGTTCAGTGGTAGAATTCTCGCC	i-tRF	36	0	72	16	0	0	36	0	0	0	0	0	17	32	0	48	0	17	0	25
tRF#37-R9JP9P9NH5SYNX2	GGTTCCATAGTGTAGTGGTTATCACGTCTGCTTTACA	5_tRNA_halve	0	0	59	123	0	0	39	0	0	0	0	0	0	0	0	23	0	42	0	13
tRF#26-897PVP941QD	TCCTCGTTAGTATAGTGGTGAGTATC	5_tRF	131	0	47	10	10	0	12	0	0	0	0	0	23	25	0	0	0	0	26	15
tRF#25-B7I72DZOIK	AACCTATTCTCAAACTTTAAATGGG	5_U_tRF	15	0	14	104	0	21	16	0	13	63	0	0	0	16	17	20	0	0	0	0
tRF#26-971O0KFMNKE	TGTCTAGTAAACAGGAGATCCTGGGT	i-tRF	0	0	32	16.002	18	31	11	0	35	35	0	25	0	18	26	0	0	11	0	40
tRF#29-86J8WPMN1EJ3	TCCCACATGGTCTAGCGGTTAGGATTCCT	5_tRF	112	0	63	13	0	0	35	0	0	0	0	0	21	20	0	19	0	0	14	0
tRF#28-ER9I69QESY0Q	ACTCCTGGCTGGCTCGCGATGTCTGTTT	3_U_tRF	94	54	16	0	0	23	16	0	0	0	0	0	0	0	0	0	0	0	93	0
tRF#25-QNR8ZP9LON	GCGTTGGTGGTTTAGTGGTAGAATT	5_tRF	0	0	28	68	20	20	32	11	0	33	21	10	0	0	0	0	0	0	23	30
tRF#27-MUWLV47PU9P	CGTGATCGTATAGTGGTTAGTACTCTG	5_tRF	21.996	11.997	0	15.003	25.002	32.004	27	0	52.002	25.002	0	0	0	0	0	15	0	51.003	0	18.999
tRF#28-KY7343RX6ND4	CCCTGGTGGTCTAGTGGTTAGGATTCGG	5_tRF	70	0	36	0	15	0	29	0	0	0	0	0	0	11	23	21	0	27	14	49
tRF#32-5DMKYOYRLHR0J	GAGACCGGGGTTCAATTCCCCGACGGGGAGCC	3_tRF	87	0	15	105	0	45	0	0	0	0	0	0	0	0	0	13	0	18	0	12
tRF#26-R9JP9P9NH50	GGTTCCATAGTGTAGTGGTTATCACG	5_tRF	58	0	108	80	0	0	33	0	0	0	0	0	0	0	0	0	0	15	0	0
tRF#21-PSQP4PW3B	GCCCGGCTAGCTCAGTCGGTA	5_tRF	17.001	0	54.999	35.001	10.998	0	0	28.998	9.999	0	0	0	39	87	11	0	0	0	0	0
tRF#23-ZLB6R3LU0E	TTGTAAACCAGGGGTCGCGAGTT	i-tRF	53	0	125	14	21	0	13	0	0	0	0	0	23	22	0	0	0	10	0	11
tRF#21-PZYU559ZE	GCCTTTTCGAGATACTGTTTT	3_U_tRF	14	0	109	34	0	0	26	0	0	0	0	0	15	32	19	21	0	0	11	10
tRF#28-MUWLV47PU90M	CGTGATCGTATAGTGGTTAGTACTCTGC	5_tRF	16.002	0	42.003	63.999	19.998	0	36.999	19.998	19.998	9.999	0	27.999	12	0	0	10	0	11.997	0	0
tRF#20-F8YKIR9N	AGCGGTTAGGATTCCTGGTT	i-tRF	161	19	0	20	0	0	0	0	11	0	20	0	0	0	0	0	0	25	33	0
tRF#20-D7OKW419	AATCTGAAGGTCGTGAGTTC	i-tRF	258	12	0	0	0	0	0	0	0	0	0	0	0	0	0	0	0	0	19	0
tRF#32-F1R38E8RO86J2	AGACCGGGGTTCAATTCCCCGACGGGGAGCCA	3_tRF	0	0	209	29	0	0	0	0	0	0	0	0	0	14	0	17	0	0	0	20
tRF#30-86J8WPMN1E8Y	TCCCACATGGTCTAGCGGTTAGGATTCCTG	5_tRF	83	0	55	19	0	0	15	0	0	0	0	0	36	34	0	0	0	21	25	0
tRF#24-R95933JK0V	GGTTCGATTCCCGGTCAGGGAACC	3_tRF	28.998	0	79.002	38.997	0	27	20.997	0	18.999	0	0	10.998	0	0	0	13	0	30.996	0	18.999
tRF#25-3K76IR3DR2	CCGGGGTTCAATTCCCCGACGGGGA	3_tRF	49	0	26	70	24	0	0	20	14	45	0	0	0	0	0	28	0	0	11	0
tRF#26-KY7343RX6ND	CCCTGGTGGTCTAGTGGTTAGGATTC	5_tRF	40	0	52	60	13	0	30	0	0	0	0	0	0	13	0	0	0	30	35	12
tRF#32-I89NJ4S2I7L7M	ATTGGTGGTTCAGTGGTAGAATTCTCGCCTGC	5_tRNA_halve	13	0	12	109	39	0	14	0	0	0	0	0	0	0	0	0	0	68	19	11
tRF#20-9JQKZLEZ	TGGGCGCGGGTTGTAACTTT	3_U_tRF	10	52	16	69	0	0	20	0	0	0	0	0	0	26	0	14	0	0	35	43
tRF#24-897PVP94FB	TCCTCGTTAGTATAGTGGTGAGTA	5_tRF	204	0	43	0	14	0	0	0	0	0	0	0	0	11	0	0	0	0	12	0
tRF#26-PS5U8918W80	GCCCGGATGATCCTCAGTGGTCTGGG	5_tRF	88	25	0	0	0	0	0	0	14	94	0	11	0	0	0	0	0	19	18	14
tRF#29-PS5P4PW3FJF2	GCCCGGATAGCTCAGTCGGTAGAGCATCA	5_tRF	13.002	0	37.998	10.002	34.998	10.002	22.002	0	0	0	0	0	37	32	0	85	0	0	0	0
tRF#42-9P9L8422YRI7XUK8N	TGTAGTGGTATCATGCAAGATTCCCATTCTTGCGACCCGGGT	i-tRF	0	0	20	141	0	0	0	15	38	30	0	0	0	0	0	25	0	0	0	13
tRF#50-QNR8VP94FQFY392J1Y0S	GCGTTGGTGGTATAGTGGTGAGCATAGCTGCCTTCCAAGCAGTTGACCCG	5_tRF	0	0	13.002	115.002	0	16.998	72	0	0	0	0	0	31	0	0	32	0	0	0	0
tRF#27-W1X6L85J3KQ	TCGCCTGCCACGCGGGAGGCCCGGGTT	i-tRF	0	0	76	35	0	0	39	0	0	0	0	0	20	47	16	12	0	0	0	35
tRF#24-FP18LPMBIN	AGCAGAGTGGCGCAGCGGAAGCGT	5_tRF	201.001	0	41.995	17.001	0	0	0	0	0	0	0	0	0	0	0	0	0	9.999	0	9.999
tRF#29-08R9D9KUMKEV	ACCGGGGTTCAATTCCCCGACGGGGAGCC	3_tRF	90	0	0	109	0	0	17	19	0	10	0	0	0	0	0	23	0	0	11	0
tRF#30-R9JP9P9NH5SY	GGTTCCATAGTGTAGTGGTTATCACGTCTG	5_tRF	59	0	100	10	0	27	32	0	0	0	0	0	17	12	0	19	0	0	0	0
tRF#33-79MP9P9NH57YD3	GTTTCCGTAGTGTAGTGGTTATCACGTTTGCCT	5_tRF	249	0	0	0	0	0	0	0	0	0	0	0	0	0	0	0	0	27	0	0
tRF#17-VNJNRXL	TAGTTCAGTTGGTTAGA	i-tRF	0	0	0	0	0	0	0	110	32	111	12	11	0	0	0	0	0	0	0	0
tRF#21-R29P4P9L0	GGGGATGTAGCTCAGTGGTAG	5_tRF	32	0	18	14	22	34	0	26	10	0	0	0	21	12	13	36	0	19	0	18
tRF#25-1Q18X3HRL7	AGTATAGTGGTGAGTATCCCCGCCT	i-tRF	147	14	0	0	0	0	0	0	0	0	0	0	0	0	0	0	0	0	113	0
tRF#24-Q1Q89P9LJI	GCGCCGCTGGTGTAGTGGTATCAT	5_tRF	91	11	65	10	10	33	0	0	0	0	0	0	13	13	0	14	0	14	0	0
tRF#23-08R959KUD4	ACCGGGGTTCGATTCCCCGACGG	i-tRF	190	24	0	0	0	0	0	0	0	0	0	0	0	0	0	0	0	22	0	36
tRF#34-6NVJ8PW7WK6WIZ	GGATTTAGGCTCCAGTCTCTTCGGGGGCGTGGGT	i-tRF	24	0	0	0	0	0	15	0	22	120	0	27	0	0	0	28	0	0	0	36
tRF#29-N3R718YKISIM	CTGGTGGTCTAGTGGTTAGGATTCGGCGC	5_tRF	25	0	0	12	73	0	0	0	0	0	0	0	19	14	21	42	0	19	14	32
tRF#41-VKS4I7LZ93Q01M3KE	TAGGGGTATGATTCTCGCTTTGGGTGCGAGAGGTCCCGGGT	i-tRF	15	0	27	78	0	20	14	0	16	42	0	0	16	0	0	15	0	0	0	28
tRF#23-9I69QESY0Q	TGGCTGGCTCGCGATGTCTGTTT	3_U_tRF	95	34	25	32	0	30	0	0	0	0	0	0	0	10	0	14	0	0	31	0
tRF#50-PS5U8918W8RV1I8B3WFY	GCCCGGATGATCCTCAGTGGTCTGGGGTGCAGGCTTCAAACCTGTAGCTG	5_tRF	12	0	0	86	0	0	31	22	10	39	12	0	21	0	0	23	0	14	0	0
tRF#24-R4VIJ4S2IN	GGGTGTAGCTCAGTGGTAGAGCGT	5_tRF	14	0	41	70	0	0	0	0	0	0	0	0	28	23	50	0	0	0	0	44
tRF#23-NQDVLKZ4Z	CTTATAATGCCGAGGTTGTGAGT	i-tRF	0	0	30	0	12	0	17	0	0	0	0	0	54	51	17	10	0	23	0	56
tRF#41-V470VR3196L85DMKE	TAGTGGTGAGTATCCCCGCCTGTCACGCGGGAGACCGGGGT	i-tRF	16	0	74	57	0	16	0	0	0	80	0	0	0	0	0	16	0	0	0	10
tRF#17-XU53F8L	TGCGAGAGGTAGCGGGA	i-tRF	0	0	10.997	0	16.002	0	0	0	38.003	150.997	0	29.001	0	0	0	0	0	0	0	23.996
tRF#23-34HWH3RX0B	CCGTGATCGTATAGTGGTTAGTA	5_tRF	9.999	0	0	12.996	15.003	176.994	0	21.996	0	20	0	0	0	0	0	0	0	10.998	0	0
tRF#22-PS5P4PW3H	GCCCGGATAGCTCAGTCGGTAG	5_tRF	0	0	36	28.998	0	61.002	0	0	13.998	72	10.002	0	0	10	10	0	0	25.002	0	0
tRF#34-RLXN4VZ87HFKJJ	GGGTATGATTCTCGCTTTGGGTGCGAGAGGTCCC	i-tRF	0	0	64	70	0	0	39	0	0	0	0	0	0	0	0	0	0	0	0	94
tRF#25-7673FEWS3V	GTTCAGTGGTAGAATTCTCGCCTGC	i-tRF	25	0	33	42	13	21	24	0	0	0	0	0	0	0	0	0	0	60	31	17
tRF#43-897PVP941QKS3W2VDY	TCCTCGTTAGTATAGTGGTGAGTATCCCCGCCTGTCACGCGGG	5_tRF	145	0	16	36	0	0	0	0	0	0	0	0	0	0	0	0	0	20	28	19
tRF#27-R29P4P9L5H2	GGGGATGTAGCTCAGTGGTAGAGCGCA	5_tRF	38.003	12.999	24.003	0	0	0	0	0	0	0	0	0	18	96	20	19	0	0	10.997	24.003
tRF#27-RWF918V0LWM	GGTGTAGCTCAGTGGTAGAGCGCGTGC	5_tRF	16.002	13.002	19.002	16.998	0	0	0	0	0	0	0	0	28	116	18	0	0	0	0	36
tRF#43-QNR8VP9NFQFY392JZ	GCGTTGGTGGTATAGTGGTTAGCATAGCTGCCTTCCAAGCAGT	5_tRF	0	0	39	73	0	13	22	0	0	0	0	0	14	27	0	49	0	10	0	16
tRF#26-BHH9B7I72DE	AAACGATCTCAACCTATTCTCAAACT	5_U_tRF	0	0	11	45	36	42	31	0	0	0	0	0	10	14	29	20	0	11	0	14
tRF#21-9NH57S36D	TGGTTATCACGTTCGCCTCAC	i-tRF	21	0	113	26	16	0	37	0	0	0	0	0	0	0	0	0	0	11	0	37
tRF#26-V470VR3196D	TAGTGGTGAGTATCCCCGCCTGTCAC	i-tRF	15	0	37	67	12	43	19	0	0	0	0	0	0	0	0	0	0	20	0	48
tRF#24-3K76IR3DIY	CCGGGGTTCAATTCCCCGACGGGG	3_tRF	105	17	45	23	0	41	0	0	0	0	0	0	0	0	0	0	0	0	11	19
tRF#31-SP5830MMUKLYD	GTCAGGATGGCCGAGCGGTCTAAGGCGCTGC	5_tRF	28.998	0	78.993	68.994	0	0	14.004	0	0	0	0	0	0	0	0	0	0	0	0	70.002
tRF#32-3SY3H3RUSMKV3	CCTCGTTAGTATAGTGGTGAGTATCCCCGCCT	5_tRF	168	0	0	14	0	0	0	0	0	0	0	0	0	0	0	0	0	34	32	12
tRF#29-QNR8VP9LFQEW	GCGTTGGTGGTATAGTGGTAAGCATAGCT	5_tRF	10	0	31	36	0	0	85	0	0	0	0	0	32	16	13	37	0	0	0	0
tRF#21-OJR44ZIZE	GAAGCGGGTGCTCTTATTTTT	3_U_tRF	10	0	223	27	0	0	0	0	0	0	0	0	0	0	0	0	0	0	0	0
tRF#27-08R959KUMKH	ACCGGGGTTCGATTCCCCGACGGGGAG	3_tRF	11	0	0	18	12	0	13	0	50	79	0	19	0	0	0	57	0	0	0	0
tRF#35-1HPSR9O9337KB6	AGGCGGCCCGGGTTCGACTCCCGGTGTGGGAACCA	3_tRF	0	0	58	122	0	20	0	0	0	0	0	0	0	12	0	14	0	0	12	21
tRF#21-X6L85J3KE	TGCCACGCGGGAGGCCCGGGT	i-tRF	0	0	73	43	12	0	18	0	28	0	0	18	0	26	0	0	0	10	0	30
tRF#19-YOHR6HEV	TTCAAATCCCGGACGAGCC	3_tRF	0	0	0	0	0	0	0	37.002	63	32.004	38.01	87.003	0	0	0	0	0	0	0	0
tRF#20-NKPY9WZZ	CTGGGGCCTGTGTGTTTTTT	3_U_tRF	14	0	12	51	0	87	13	0	0	0	0	0	0	0	0	31	0	14	35	0
tRF#20-25RJ0EDZ	CACACGGGGCACAATAATTT	3_U_tRF	22	25	11	61	0	0	18	0	0	0	0	0	15	22	0	16	0	0	50	17
tRF#25-V4V47Q2WW1	TAGTGTAGTGGTTATCACGTTCGCC	i-tRF	25	0	48	23	0	28	11	0	0	0	0	0	17	12	13	0	0	28	23	28
tRF#33-RX6NMH490VL8DJ	GGTTAGGATTCGGCGCTCTCACCGCCGCGGCCC	i-tRF	0	0	67	101	0	13	11	0	0	0	0	0	0	27	11	0	0	0	0	25
tRF#31-P4R8YP9LON4VD	GCATGGGTGGTTCAGTGGTAGAATTCTCGCC	5_tRF	18	0	11	0	23	48	23	0	0	72	0	12	0	0	0	33	0	15	0	0
tRF#21-SX73V2Y8D	GTCTAGTGGTTAGGATTCGGC	i-tRF	49	10	27	45	13	0	0	0	0	0	0	0	0	0	0	69	0	0	0	41
tRF#27-KY7343RX6NK	CCCTGGTGGTCTAGTGGTTAGGATTCG	5_tRF	25	12	49	26	0	28	25	0	0	0	0	0	0	22	32	20	0	15	0	0
tRF#31-P46INO86RM7KE	GCATGGGACTCTTAATCCCAGGGTCGTGGGT	i-tRF	14	0	28	60	0	0	14	22	0	22	0	10	0	0	0	23	0	25	0	36
tRF#26-MUWLV47PU9E	CGTGATCGTATAGTGGTTAGTACTCT	5_tRF	18	10.998	21.996	45.999	16.002	0	51.003	0	19.998	19.998	0	0	0	0	0	29	0	20.997	0	0
tRF#34-ZRS3S3RX8HYVH2	TTTCCGTAGTGTAGTGGTTATCACGTTCGCCTCA	5_tRNA_halve	242.991	0	0	0	0	0	0	0	0	0	0	0	0	0	0	0	0	0	10.998	0
tRF#45-I6D3887S1RMH5MSDQZ	ATTCAAAGGTTCCGGGTTCGAGTCCCGGCGGAGTCGTAACGCTTT	3_U_tRNA_halve	0	0	0	217	0	19	17	0	0	0	0	0	0	0	0	0	0	0	0	0
tRF#28-F3R9D927Y8D8	AGAGTGGTTCAATTCCACCTTTCGGGCG	3_tRF	0	0	17	15	0	0	0	0	41	142	10	13	0	0	0	0	0	0	0	14
tRF#19-VIJKS2I1	TAGCTCAGGGGTAGAGCAC	i-tRF	0	0	0	40	0	59	0	125	0	15	13	0	0	0	0	0	0	0	0	0
tRF#25-R3SJ83RPFW	GGGGTGTAGCTCAGTGGTAGAGCGT	5_tRF	0	0	46	34	0	0	24	0	0	0	0	0	23	47	51	0	0	0	0	26
tRF#36-S4I7LZM3Q01M3KE	GTATGATTCTCGCTTCGGGTGCGAGAGGTCCCGGGT	i-tRF	9.999	0	66.999	49.002	0	0	48.999	0	0	0	0	0	0	20	0	37	0	0	0	18.999
tRF#24-46S9Y8RHJY	CTCCAGTCTCTTCGGGGGCGTGGG	i-tRF	0	0	0	0	0	0	0	30.002	0	217.999	0	0	0	0	0	0	0	0	0	0
tRF#23-NMEH623K0E	CTGTCACGCGGGAGACCGGGGTT	i-tRF	0	0	89	39	0	33	11	0	0	0	0	0	20	32	0	0	0	12	0	12
tRF#31-P27JPJ60MV9JD	GCAGAGTGGCGCAGCGGAAGCGTGCTGGGCC	5_tRF	128.997	0	0	18.999	0	30.996	0	0	0	0	0	0	0	0	0	0	0	68.004	0	0
tRF#20-SP5830MM	GTCAGGATGGCCGAGCGGTC	5_tRF	36	0	20.997	0	0	37.998	0	0	36	0	0	32.004	0	26	0	29	0	27.999	0	0
tRF#21-73VL8RPYE	GTGGTTAGTATCCCCGCCTGT	i-tRF	90	41	0	38	12	40	0	0	0	0	0	0	0	0	0	0	0	12	0	12
tRF#24-1N3KYUSRI8	AGGTTCCGGGTTCGAGTCCCGGCG	i-tRF	0	0	0	0	0	0	0	31	35	0	54	125	0	0	0	0	0	0	0	0
tRF#20-YE4PRS93	TTAATCTCAGGGTCGTGGGT	i-tRF	0	0	60	49	23	0	21	0	0	0	0	0	13	0	0	0	0	29	22	27
tRF#20-73V6M7QZ	GTGGTTATCACGTCTGCTTT	i-tRF	125	0	0	20	0	0	0	0	0	0	0	0	0	0	0	0	0	70	28	0
tRF#20-1PSJQM17	AGTAGGTAGCGCGTCAGTCT	i-tRF	10	0	23	28	23	0	12	0	0	0	0	0	12	14	0	0	0	20	14	87
tRF#20-LBLM8D4N	CGAAACGATCTCAACCTATT	5_U_tRF	0	16	34	74	12	0	16	0	0	0	0	0	16	0	21	22	0	11	21	0
tRF#50-7EMQ18Y3E7QN7JLP21W3	GTGATCGTATAGTGGTTAGTACTCTGCGTTGTGGCCGCAGCAACCTCGGT	5_tRF	0	0	0	0	0	0	0	0	21.996	207.999	0	0	0	0	0	13	0	0	0	0
tRF#24-NJ9ILU972Q	CTGGCTGGCTCGCGATGTCTGTTT	3_U_tRF	39	14	27	41	0	0	0	0	0	0	0	0	24	31	25	22	0	0	19	0
tRF#23-DRFU8U767	AATCCAGCGATCCGAGTTCAAAT	i-tRF	0	0	0	0	26	0	20	0	0	17	0	0	64	52	16	19	0	0	11	17
tRF#22-WB8US5652	TCGAATCCGAGTCACGGCACCA	3_tRF	0	0	31	12	0	0	0	34	10	46	31	48	0	0	0	0	0	0	0	30
tRF#29-JY7383RPD9JM	CATTGGTGGTTCAGTGGTAGAATTCTCGC	5_tRF	0	0	18	30	10	0	20	11	12	49	0	0	18	26	0	10	0	19	0	18
tRF#26-7EMQ18Y3E70	GTGATCGTATAGTGGTTAGTACTCTG	5_tRF	23.004	15.003	15.003	26.001	30.996	0	19.998	0	21.996	0	0	12.996	0	0	0	0	0	27.999	32.004	15.003
tRF#24-7343RX6N19	GTGGTCTAGTGGTTAGGATTCGGC	i-tRF	34	0	69	35	34	0	10	0	0	0	0	0	0	0	0	0	0	12	0	46
tRF#34-VBY9PYKHM26RIZ	TAGAATTCTCGCCTGCCACGCGGGAGGCCCGGGT	i-tRF	0	0	29	28	0	0	18	0	30	40	0	40	0	0	0	0	0	10	0	45
tRF#28-R9JP9PMNH50D	GGTTCCATAGTGTAGCGGTTATCACGTC	5_tRF	54	0	54	69	12	51	0	0	0	0	0	0	0	0	0	0	0	0	0	0
tRF#20-R29P4P9L	GGGGATGTAGCTCAGTGGTA	5_tRF	39	0	19	12	59	36	0	0	0	0	0	0	23	16	0	19	0	0	16	0
tRF#34-8KIJLJR7DJQV25	TCAGGATGGCCGAGCGGTCTAAGGCGCTGCGTTC	5_tRNA_halve	177	0	0	26.998	10	0	0	0	0	0	0	0	0	0	0	0	0	25	0	0
tRF#42-79MP9P9NH57S362VL	GTTTCCGTAGTGTAGTGGTTATCACGTTCGCCTCACACGCGA	5_tRF	0	0	54	74.997	0	0	10.998	0	0	36.999	0	0	15	0	0	36	0	10.998	0	0
tRF#31-7PVP941QKS3WD	GTTAGTATAGTGGTGAGTATCCCCGCCTGTC	i-tRF	36	0	0	0	0	0	0	0	0	0	0	0	0	0	0	0	0	147	43	12
tRF#22-897PVP94H	TCCTCGTTAGTATAGTGGTGAG	5_tRF	84	0	22	0	10	0	0	0	0	0	15	21	30	19	0	14	0	10	0	13
tRF#20-YEKPRS93	TTAATCCCAGGGTCGTGGGT	i-tRF	10	0	25	16	63	0	13	0	0	0	0	0	0	0	0	0	0	89	0	22
tRF#24-YKIHFK8S2E	TTAGGATGCGAGAGGTCCCGGGTT	i-tRF	23	0	21	24	0	0	23	0	0	0	0	0	23	64	15	18	0	0	0	27
tRF#26-RK9P4P9L5HD	GGGGGTGTAGCTCAGTGGTAGAGCGC	5_tRF	39.996	19.998	11.997	10.998	10.998	0	0	0	0	0	0	0	14	62	23	25	0	0	0	19.998
tRF#28-944EBV2KWHDZ	TGGTGCTAATAACGCCAAGGTCGCGGGT	i-tRF	0	0	80	38	0	0	16	0	0	0	0	0	23	24	0	0	0	0	0	55
tRF#50-R0LR6LQ6S8V0J6OZYEN0	GGGAGCGCCCGGATAGCTCAGTCGGTAGAGCATCAGACTTTTAATCTGAG	other	13	0	52	69	0	21	10	0	0	0	0	0	13	13	0	45	0	0	0	0
tRF#21-45N2P4Z9E	CTCACCTGGAGCATGTTTTCT	3_U_tRF	13	19	44	16	0	0	46	0	0	0	0	0	0	0	0	0	0	13	0	84
tRF#29-Y2R79K3BEEH2	TTAGAGGTCTTGGGGCCGAAACGATCTCA	5_U_tRF	0	0	21	27	11	18	0	0	0	0	0	0	0	44	11	91	0	12	0	0
tRF#28-6XQ6S8V0J8DR	GGCTAGCTCAGTCGGTAGAGCATGGGAC	5_tRF	12	0	63	75	26.001	0	30.999	0	0	0	0	0	0	0	0	0	0	9.999	0	18
tRF#27-94SX73V2Y8K	TGGTGGTCTAGTGGTTAGGATTCGGCG	5_tRF	15	0	47	65	22	0	10	0	0	0	0	0	14	0	0	18	0	10	0	33
tRF#20-NZL2UYZZ	CTTTTCGAGATACTGTTTTT	3_U_tRF	11	0	157	51	0	0	15	0	0	0	0	0	0	0	0	0	0	0	0	0
tRF#29-8W1W18YMEN1V	TCCGTAGTGTAGTGGTTATCACGTTCGCC	5_tRF	24	0	34	15	25	28	19	0	0	0	0	0	21	0	21	13	0	13	0	20
tRF#20-94V4SMIF	TGGTGTAGTGGTATCATGCA	i-tRF	17	0	38	27	21	0	23	0	0	0	0	0	0	0	0	0	0	37	0	70
tRF#25-F91SS2P46I	AGCTCAGTCGGTAGAGCATGGGACT	i-tRF	65	0	25	0	0	32	0	0	0	0	0	0	16	17	15	0	0	47	15	0
tRF#38-KY5J7KYUHRERXFD2	CCCTGGAGGCGTGGGTTCGAATCCCACTCCTGACACCA	3_tRF	15.001	0	110.001	54.999	0	0	10.003	0	0	0	0	0	0	0	0	0	0	10.997	11.998	17.997
tRF#21-96L85DMKE	TGTCACGCGGGAGACCGGGGT	i-tRF	0	0	165	12	0	0	0	0	18	0	0	35	0	0	0	0	0	0	0	0
tRF#30-ZPQR17NSRJ7K	TTTAGGCTCCAGTCTCTTCGGGGGCGTGGG	i-tRF	0	0	0	0	0	0	0	0	23	105	0	51	0	0	0	15	0	0	0	36
tRF#20-720YJY7Z	GTGGAACCTGCATTGGTTTT	3_U_tRF	71	15	35	0	17	0	31	0	0	0	0	0	0	0	0	0	0	15	46	0
tRF#29-J7KB8JLHZVKQ	CATCTCCAAATCAGCCGACGTTTGCTTTT	3_U_tRF	0	11	47	49	0	0	13	0	0	0	0	0	13	0	24	26	0	0	47	0
tRF#22-BMFSENXZQ	AAATCAGCCGACGTTTGCTTTT	3_U_tRF	11	0	28	38	0	0	14	0	0	0	0	0	19	19	29	18	0	0	54	0
tRF#20-P66Y54J4	GCCCAGGCTGGAGTGCAGTG	3_U_tRF	0	0	0	0	0	230	0	0	0	0	0	0	0	0	0	0	0	0	0	0
tRF#31-YYV4V47Q2WW1E	TTCTGTAGTGTAGTGGTTATCACGTTCGCCT	5_tRF	135	0	0	0	0	0	0	0	0	0	0	0	0	0	0	0	0	69	15	10
tRF#21-JY7383RPB	CATTGGTGGTTCAGTGGTAGA	5_tRF	36	0	25	14	24	0	0	0	13	38	0	0	0	14	0	23	10	11	20	0
tRF#32-3L7L73V6M9P91	CCGTAGTGTAGTGGTTATCACGTTCGCCTCAC	5_tRNA_halve	0	0	40.995	117.999	0	27.999	0	0	0	0	0	0	0	0	0	0	0	0	0	41.004
tRF#34-QNR8VP94FQFY1Q	GCGTTGGTGGTATAGTGGTGAGCATAGCTGCCTT	5_tRNA_halve	12	0	30	72	0	0	10.998	0	0	0	0	0	0	15	13	49	0	10.998	0	15
tRF#20-S5QKF1R3	GTCACGCGGGAGACCGGGGT	i-tRF	0	0	35	0	0	19	0	0	0	162	0	0	0	0	0	0	0	0	11	0
tRF#28-X24ZD7JKW4DZ	TGAGACTCTTAATCTCAGGGTCGTGGGT	i-tRF	0	0	58	91	11	0	23	0	0	0	0	0	0	0	15	0	0	0	0	28
tRF#21-9NH5SYNXD	TGGTTATCACGTCTGCTTTAC	i-tRF	0	0	89	43	0	0	23	0	0	0	0	0	24	0	12	0	0	15	0	19
tRF#33-LSM1M3WE8SSPDX	CGCCGCGGCCCGGGTTCGATTCCCGGTCAGGGA	3_tRNA_halve	0	0	0	50.004	0	10.998	0	0	39.996	0	36	46.998	0	0	0	41	0	0	0	0
tRF#24-9M88I26WIZ	TGGTCTCCGGATGGAGGCGTGGGT	i-tRF	0	0	0	91	0	58	0	0	0	0	0	0	0	0	0	0	0	26	11	38
tRF#28-3L7L73J6M9DV	CCGTAGTGTAGTGGTCATCACGTTCGCC	5_tRF	26	0	50	74	13	0	13	0	0	0	0	0	0	0	0	0	0	11	18	17
tRF#32-FQRDWXHR13M8N	AGCATGGGACTCTTAATCCCAGGGTCGTGGGT	i-tRF	22	0	32	52	0	28	12	0	15	0	0	0	0	0	0	0	0	17	0	44
tRF#28-QNR8VP9LFQ9	GCGTTGGTGGTATAGTGGTAAGCATAGC	5_tRF	0	0	21	80	0	0	52	0	0	0	0	0	20	17	16	0	0	0	16	0
tRF#22-B7I72DZOI	AACCTATTCTCAAACTTTAAAT	5_U_tRF	0	14	29	25	25	0	44	0	0	0	0	0	15	0	17	27	0	0	0	26
tRF#23-R3WE8RO8DX	GGGGTTCGATTCCCCGACGGGGA	3_tRF	12	0	0	0	0	0	0	36.996	56.996	52.004	12	12	0	17	0	22.99	0	0	0	0
tRF#28-Z3R918VBY9DV	TTGGTGGTTCAGTGGTAGAATTCTCGCC	5_tRF	0	0	30	24	25	0	12	51	12	13	0	18	0	0	0	0	0	24	0	12
tRF#19-FEWS3VF8	AGAATTCTCGCCTGCCACG	i-tRF	0	0	0	0	0	0	0	0	0	0	0	0	59	71	66	25	0	0	0	0
tRF#35-4WVLV470VR3196	CTCGTTAGTATAGTGGTGAGTATCCCCGCCTGTCA	5_tRNA_halve	19	0	0	95	10	0	0	0	0	0	0	0	0	0	0	0	0	43	54	0
tRF#26-7IDOL61MQKE	GTGCTAATAACGCCAAGGTCGCGGGT	i-tRF	0	0	76	34	0	0	22	0	0	0	0	0	23	18	0	0	0	18	0	30
tRF#21-R8B7PNRZE	GGTGGAACCTGCATTGGTTTT	3_U_tRF	24	0	26	10	36	70	11	0	0	0	0	0	0	0	0	0	0	13	31	0
tRF#33-Q99P9P9NH57SD3	GCTTCTGTAGTGTAGTGGTTATCACGTTCGCCT	5_tRF	59	0	0	0	0	0	0	0	0	0	0	0	0	0	0	0	0	142	0	19
tRF#26-3SY3H3RXSMD	CCTCGTTAGTATAGTGGTTAGTATCC	5_tRF	0	0	0	0	0	0	0	116	0	45	0	17	0	13	0	11	0	0	18	0
tRF#31-7343RX6NMH49B	GTGGTCTAGTGGTTAGGATTCGGCGCTCTCA	i-tRF	185	0	0	0	0	0	0	0	0	0	0	0	0	0	0	0	0	34	0	0
tRF#23-4QD7OKW4Z	CTCATAATCTGAAGGTCGTGAGT	i-tRF	0	0	29	37	22	0	16	0	0	0	0	0	0	0	0	0	0	57	0	58
tRF#24-KB8JLHZVKQ	CCAAATCAGCCGACGTTTGCTTTT	3_U_tRF	0	0	27	57	0	0	12	0	0	0	0	0	0	23	0	21	0	0	79	0
tRF#18-HR05X6D2	ATCCCACCACTGCCACCA	3_tRF	0	0	0	20	0	0	0	0	30	82	41	46	0	0	0	0	0	0	0	0
tRF#24-SL735L8RI3	GTATAGTGGTGAGTATCCCCGCCT	i-tRF	102	0	23	0	0	24	10	0	0	0	0	0	0	0	0	0	0	13	33	12
tRF#21-I7L7P5QKB	ATTCTCGCCTGCCACGCGGGA	i-tRF	0	0	15	13	0	0	0	0	0	151	14	23	0	0	0	0	0	0	0	0
tRF#22-YLI1539UN	TTATAATGCCGAGGTTGTGAGT	i-tRF	0	0	20	0	0	0	17	0	0	0	0	0	28	21	12	0	0	33	0	85
tRF#20-VIJMRX5H	TAGCTCAGTCGGTTAGAGCG	i-tRF	0	0	0	0	0	0	0	120	0	96	0	0	0	0	0	0	0	0	0	0
tRF#22-5P4PW3FJI	GATAGCTCAGTCGGTAGAGCAT	i-tRF	0	0	87.997	12.999	16.002	0	15.001	0	0	0	0	0	0	0	0	0	0	19.999	26.999	37.002
tRF#32-8422YRI7XUK8N	TCATGCAAGATTCCCATTCTTGCGACCCGGGT	i-tRF	0	0	22	25	0	0	10	13	34	34	0	51	0	0	0	0	0	0	0	26
tRF#29-MEF91SS2PMER	CGGATAGCTCAGTCGGTAGAGCATCAGAC	5_tRF	0	0	64.002	43.002	19.002	24	10.002	0	0	0	0	0	0	0	0	0	0	19.002	0	34.998
tRF#27-RW18V6XO59J	GGTGTAGTGGTATCATGCAAGATTCCC	i-tRF	86	0	0	58	0	0	17	0	0	0	0	0	0	0	0	0	0	52	0	0
tRF#25-PS5U8918W8	GCCCGGATGATCCTCAGTGGTCTGG	5_tRF	89	14	20	10	0	0	13	0	0	0	0	17	0	0	0	0	0	15	23	12
tRF#26-FP18LPMBQ4D	AGCAGAGTGGCGCAGCGGAAGCGTGC	5_tRF	202.995	0	9.999	0	0	0	0	0	0	0	0	0	0	0	0	0	0	0	0	0
tRF#41-87R8WP9N1EWJQ72SD	TCCCTGGTGGTCTAGTGGTTAGGATTCGGCGCTCTCACCGC	5_tRF	0	0	20	31	0	21	0	0	0	26	0	12	0	29	0	73	0	0	0	0
tRF#21-R8WP9N1EE	GGTGGTCTAGTGGTTAGGATT	i-tRF	36	12	23	25	11	0	0	0	0	0	0	11	0	11	0	0	0	21	43	18
tRF#35-789LV47PJPN1Y6	GTTGGTGGTATAGTGGTTAGCATAGCTGCCTTCCA	5_tRNA_halve	0	0	0	82	10	0	0	0	0	0	0	0	0	0	0	0	0	108	11	0
tRF#34-68K87SERM492E2	GGCGGCCCGGGTTCGACTCCCGGTGTGGGAACCA	3_tRF	0	0	68	96	0	0	0	0	0	0	0	0	0	0	0	0	0	12	14	21
tRF#25-Y2R79K3BEE	TTAGAGGTCTTGGGGCCGAAACGAT	5_U_tRF	0	10	0	0	0	0	0	0	0	0	0	0	0	0	19	12	0	10	0	160
tRF#22-WB884U1D2	TCGAATCCGGCTCGAAGGACCA	3_tRF	0	0	58	0	0	0	17	0	0	99	0	36	0	0	0	0	0	0	0	0
tRF#31-OSRN2NKSEK51B	GACCGGGGTTCAATTCCCCGACGGGGAGCCA	3_tRF	0	0	159	20	0	0	0	0	0	0	0	0	0	19	0	12	0	0	0	0
tRF#20-88I26WRN	TCCGGATGGAGGCGTGGGTT	i-tRF	10	0	28	45	33	0	68	0	0	0	0	0	0	0	0	0	0	0	0	26
tRF#28-R1RXQ678Y2D8	GGGCCGGTTAGCTCAGTTGGTTAGAGCG	5_tRF	0	0	0	0	0	0	0	0	22	97	0	18	0	10	10	52	0	0	0	0
tRF#22-N44S5N09N	CTGTGCTCCGGAGTTACCTCGT	3_U_tRF	0	0	31	0	0	0	10	0	31	17	44	64	0	0	0	0	0	0	0	12
tRF#20-7343RX6N	GTGGTCTAGTGGTTAGGATT	i-tRF	27.999	10.998	16.002	53.001	10.998	0	20.997	0	0	0	0	0	0	0	0	0	0	18	21.996	28.998
tRF#27-OSRNLNKSEKL	GACCGGGGTTCGATTCCCCGACGGGGA	3_tRF	27	0	0	24	18	0	9.996	0	0	30	0	0	0	10	0	70	0	9.996	0	9.996
tRF#34-I7XUK87SIRMJI8	ATTCTTGCGACCCGGGTTCGATTCCCGGGCGGCG	3_tRNA_halve	0	0	0	0	0	0	114	0	0	0	0	0	0	17	0	77	0	0	0	0
tRF#21-4E8BR9M3E	CTAATTCAAAGGTTCCGGGTT	i-tRF	0	0	82	53	19	0	0	0	0	0	0	0	0	0	0	0	0	12	0	42
tRF#26-18LPMBQ4NKD	AGTGGCGCAGCGGAAGCGTGCTGGGC	i-tRF	38.997	0	21.996	0	16.002	0	0	0	0	0	0	0	14	0	0	56.01	0	59.994	0	0
tRF#47-34HWH3RXSINHZ4PVFOJ	CCGTGATCGTATAGTGGTTAGTACTCTGCGTTGTGGCCGCAGCAACC	5_tRF	0	0	0	0	0	0	0	53.001	70.002	24.003	27	14.004	0	0	0	18	0	0	0	0
tRF#33-OUR8309NDJ58W	GACGAGGTGGCCGAGTGGTTAAGGCGATGGACT	5_tRF	108.003	0	0	0	0	0	0	0	0	0	0	0	0	0	0	0	0	0	98	0
tRF#30-3JVIJMRPFQRD	CCGGCTAGCTCAGTCGGTAGAGCATGGGAC	5_tRF	0	0	93.999	24.999	23.001	0	41.001	0	0	0	0	0	0	0	0	0	0	0	0	23.001
tRF#20-R8WP9N1E	GGTGGTCTAGTGGTTAGGAT	i-tRF	17	0	20	24	25	0	17	0	0	0	0	0	0	15	0	15	0	0	0	73
tRF#39-0668K87SERM492E2	ACCCAGGCGGCCCGGGTTCGACTCCCGGTGTGGGAACCA	3_tRNA_halve	24	0	10	122	0	15	0	0	0	0	0	0	0	0	0	0	0	25	0	10
tRF#20-DRJII66K	AATCCCAGCTATTCAGGAGG	3_U_tRF	75	21	0	36	0	0	0	0	0	0	0	0	0	0	0	28	0	46	0	0
tRF#35-O2Z0R95M3973L6	GAAGATTGAGGGTTCGAGTCCCTTCGTGGTCGCCA	3_tRF	0	0	153	10	0	21	21	0	0	0	0	0	0	0	0	0	0	0	0	0
tRF#20-87R8WP9N	TCCCTGGTGGTCTAGTGGTT	5_tRF	76	17	20	54	0	0	0	0	0	0	0	0	10	27	0	0	0	0	0	0
tRF#20-R7F8YKIR	GGTCTAGCGGTTAGGATTCC	i-tRF	0	0	23	47	20	0	0	0	0	0	0	0	37	21	0	0	0	0	56	0
tRF#23-R4VIJ4S2DU	GGGTGTAGCTCAGTGGTAGAGCA	5_tRF	0	0	0	56	50	61	0	36	0	0	0	0	0	0	0	0	0	0	0	0
tRF#26-54QFQ2FWQ80	GAGTGGCGCAGCGGAAGCGTGCTGGG	5_tRF	28.998	0	23.004	9.999	46.998	0	0	35.001	9.999	12.996	19.998	16.002	0	0	0	0	0	0	0	0
tRF#33-79MP9P9NHQ7SD3	GTTTCCGTAGTGTAGTGGTTATCATGTTCGCCT	5_tRF	139	0	0	0	0	0	0	0	0	0	0	0	0	0	0	0	0	50	13	0
tRF#26-QR17NSRJ7KE	GCTCCAGTCTCTTCGGGGGCGTGGGT	i-tRF	14	0	0	0	0	0	17.003	14	0	47.999	0	23.002	15	29	0	28	0	0	0	12.999
tRF#32-Z3R918VBY9PYJ	TTGGTGGTTCAGTGGTAGAATTCTCGCCTGCC	5_tRNA_halve	0	0	63	22	17	0	15	0	0	0	0	16	0	0	0	0	0	19	10	39
tRF#21-WKM2736ZE	TCGGGCGGGAGTGGTGGCTTT	3_U_tRF	11	0	25	20	12	0	14	0	11	0	0	0	23	17	36	32	0	0	0	0
tRF#26-RW18V6XO59D	GGTGTAGTGGTATCATGCAAGATTCC	i-tRF	20	10	0	50	15	0	25	0	0	0	0	0	0	0	0	0	0	68	13	0
tRF#23-7J843W1RDH	GTGGCTCATGCCTGTAGTCCCAG	3_U_tRF	33	0	26	11	21	0	0	0	11	0	13	0	19	26	11	0	0	0	10	20
tRF#23-SX73V2Y8DM	GTCTAGTGGTTAGGATTCGGCGC	i-tRF	82	11	0	10	48	0	0	0	0	0	0	0	0	0	0	0	0	26	12	11
tRF#19-B1RHODE2	AAACCGGGCGGAAACACCA	3_tRF	0	0	29.984	25.008	82	0	0	0	0	0	0	0	23.01	12.99	0	0	0	15.008	0	11.008
tRF#22-46S9Y8RHP	CTCCAGTCTCTTCGGGGGCGTG	i-tRF	0	0	11.998	28	0	0	0	0	0	122.997	0	35.994	0	0	0	0	0	0	0	0
tRF#21-SP5830MME	GTCAGGATGGCCGAGCGGTCT	5_tRF	87.003	0	28.008	18.999	0	0	16.002	0	0	0	0	0	0	11	0	0	0	26.001	0	10.998
tRF#21-FP18LPMB0	AGCAGAGTGGCGCAGCGGAAG	5_tRF	115.004	0	32.997	0	0	38.997	10.998	0	0	0	0	0	0	0	0	0	0	0	0	0
tRF#24-I89NJ4S2F5	ATTGGTGGTTCAGTGGTAGAATTC	5_tRF	0	0	0	51	0	0	0	24	41	0	0	12	18	14	19	0	0	0	0	18
tRF#35-79MP9P9MH57S3O	GTTTCCGTAGTGTAGTGGTCATCACGTTCGCCTAA	5_tRNA_halve	197	0	0	0	0	0	0	0	0	0	0	0	0	0	0	0	0	0	0	0
tRF#34-3SY3H3RUSMKVHN	CCTCGTTAGTATAGTGGTGAGTATCCCCGCCTGT	5_tRNA_halve	20	0	0	0	0	0	0	0	12	0	24	34	0	0	11	20	0	20	24	32
tRF#20-HJ8J9L5H	ATAGCTCAGCTGGTAGAGCG	i-tRF	0	11	0	0	0	0	0	127	0	59	0	0	0	0	0	0	0	0	0	0
tRF#32-94SX73V2Y8L95	TGGTGGTCTAGTGGTTAGGATTCGGCGCTCTC	5_tRNA_halve	40	0	0	82	0	0	0	0	0	0	0	0	0	0	0	0	0	46	12	16
tRF#20-D6PUMZQZ	AATCAGCCGACGTTTGCTTT	3_U_tRF	0	0	59	47	0	34	16	0	0	0	0	0	0	21	19	0	0	0	0	0
tRF#23-KM4Y4M630Q	CCATCCTCTGCTATCGGAGTTTT	3_U_tRF	0	20	0	53	0	76	0	0	0	0	0	0	0	0	0	0	0	0	35	11
tRF#27-94V4SMIFFNJ	TGGTGTAGTGGTATCATGCAAGATTCC	i-tRF	12	0	33	46	0	0	37	0	0	0	0	0	0	0	0	0	0	22	0	45
tRF#20-D6FROX36	AATCAAGCCCGACTACCTCA	5_U_tRF	0	0	0	0	43	29	0	65	0	58	0	0	0	0	0	0	0	0	0	0
tRF#35-R0PSR9593J2426	GGGAGGCCCGGGTTCGATTCCCGGCCAATGCACCA	3_tRF	0	0	42.996	76.998	0	0	22.998	0	18	0	0	0	0	10	0	24	0	0	0	0
tRF#22-9MV47P594	TGGTCTAGTGGTTAGGATTCGG	i-tRF	31	14	32	0	11	0	0	0	0	0	0	0	0	0	0	78	0	0	16	11
tRF#37-9EUK46S9Y8RH93Q	TGGATTAAGGCTCCAGTCTCTTCGGGGGCGTGGGTTT	i-tRF	80	0	0	0	0	0	0	0	0	0	0	0	12	13	34	21	0	0	0	33
tRF#25-BUW60XY9BI	AACGATCTCAACCTATTCTCAAACT	5_U_tRF	0	0	15	45	0	0	14	0	0	0	0	0	16	14	43	17	0	0	18	11
tRF#34-PS5P4PW3FJHPEQ	GCCCGGATAGCTCAGTCGGTAGAGCATCAGACTT	5_tRNA_halve	46.998	0	22.002	28.002	0	16.002	12	0	0	0	0	0	0	0	0	0	0	57	0	10.002
tRF#21-Q1Q89P9LE	GCGCCGCTGGTGTAGTGGTAT	5_tRF	78	0	44	0	37	0	0	0	0	0	0	0	0	0	0	0	0	12	21	0
tRF#30-QNR8VP9LFQFY	GCGTTGGTGGTATAGTGGTAAGCATAGCTG	5_tRF	13	0	60	45	0	0	19	0	0	0	0	0	14	0	19	0	0	0	0	21
tRF#50-KY7343RX6NMH490VL8K8	CCCTGGTGGTCTAGTGGTTAGGATTCGGCGCTCTCACCGCCGCGGCCCGG	5_tRF	0	0	0	28	0	0	0	15	0	106	0	0	0	0	0	42	0	0	0	0
tRF#23-54QFQ2FWDW	GAGTGGCGCAGCGGAAGCGTGCT	5_tRF	94.996	9.999	12.996	0	23	0	0	0	12	0	18.999	0	0	0	0	0	0	0	0	18.999
tRF#36-JKIWRNL3KQNK71B	CAGGGATTGTGGGTTCGAGTCCCATCTGGGGTGCCA	3_tRF	0	0	68	53	0	0	0	0	0	43	0	11	0	0	0	0	0	0	0	14
tRF#27-WN1Q18X3HRK	TCGTTAGTATAGTGGTGAGTATCCCCG	5_tRF	22	0	33	25	39	0	0	0	0	0	0	0	0	0	0	0	0	11	13	46
tRF#20-MMUKLYM9	CGGTCTAAGGCGCTGCGTTC	i-tRF	63	0	0	0	0	0	0	0	0	0	0	0	0	0	0	0	0	9.999	73.998	41.004
tRF#20-DRJFNY6K	AATCCCAGCACTTTGGGAGG	3_U_tRF	115.999	0	0	42	0	0	0	0	0	0	0	0	0	0	0	30	0	0	0	0
tRF#27-V470VR3196K	TAGTGGTGAGTATCCCCGCCTGTCACG	i-tRF	13	0	73	38	12	0	19	0	0	0	0	0	0	0	0	0	0	0	0	32
tRF#32-87R8WP9I1EWJM	TCCCTGGTGGTCTAGTGGCTAGGATTCGGCGC	5_tRF	152	0	0	0	0	0	10	0	0	0	0	0	11	0	0	0	0	0	0	13
tRF#22-K34ZMKQ44	CCAGTCTCTTCGGGGGCGTGGG	i-tRF	0	0	0	0	0	0	0	30.002	11.998	143.999	0	0	0	0	0	0	0	0	0	0
tRF#22-VBY9PYKHK	TAGAATTCTCGCCTGCCACGCG	i-tRF	0	0	43	34	0	0	16	0	0	0	0	0	18	0	16	0	0	12	0	46
tRF#20-X6RNQWNZ	TGCCAGGGTTGCTGTCTTTT	3_U_tRF	32	0	22	43	0	0	16	0	0	0	0	0	21	20	15	16	0	0	0	0
tRF#30-3SY3H3RXSMKV	CCTCGTTAGTATAGTGGTTAGTATCCCCGC	5_tRF	0	0	0	0	22	40	0	71	0	41	0	11	0	0	0	0	0	0	0	0
tRF#23-Z5EFOK8YDZ	TTTACACGCAGAAGGTCCTGGGT	i-tRF	12	0	35	26	0	0	40	0	0	0	0	0	34	0	0	10	0	0	0	27
tRF#23-78QHRYUI0Q	GTTGGGCGCGGGTTGTAACTTTT	3_U_tRF	0	20	0	103	0	0	15	0	0	0	0	0	0	12	23	11	0	0	0	0
tRF#22-R84QPYVMJ	GGTGGCTCATGCCTGTAGTCCC	3_U_tRF	105	0	13	20	10	0	0	0	0	0	0	10	0	0	0	0	0	0	15	11
tRF#25-18VBY9PYKH	AGTGGTAGAATTCTCGCCTGCCACG	i-tRF	14	0	24	11	14	0	21	0	0	0	0	18	10	13	18	0	0	23	0	17
tRF#22-7LQ673FJN	GTGTAGCTCAGTGGTAGAGCGT	5_tRF	0	0	14	27	0	0	0	0	0	0	0	0	22	47	19	0	0	15	0	39
tRF#29-MJ6B25UBDRHQ	CGGGCGGAAACACACTAAAAAATCCCTTT	3_U_tRF	60	28	15	12	0	23	0	0	0	0	0	0	0	0	0	0	0	0	43	0
tRF#30-PSR95933JKB6	GCCCGGGTTCGATTCCCGGTCAGGGAACCA	3_tRF	0	0	51.003	34.002	22.995	0	15.003	12	0	16.002	0	0	0	0	0	16	0	12.996	0	0
tRF#33-R3HJ83RPFQZD0M	GGGGTATAGCTCAGTGGTAGAGCATTTGACTGC	5_tRNA_halve	169	0	0	0	0	0	0	0	0	0	0	0	0	0	0	0	0	0	0	11
tRF#20-WK1I5J10	TCGGGAGGCTGAGGCAGGAG	3_U_tRF	48	0	0	0	0	0	0	0	36	23	11	62	0	0	0	0	0	0	0	0
tRF#23-6LQ6S8V0DI	GGATAGCTCAGTCGGTAGAGCAT	5_tRF	0	0	42	39.998	0	32.998	14	0	0	0	0	0	0	0	0	0	0	19.999	0	31.003
tRF#24-WP9N1EWJI5	TCTAGTGGTTAGGATTCGGCGCTC	i-tRF	53	0	10	23	0	0	0	0	0	0	0	0	0	0	0	0	0	42	29	22
tRF#30-R8YP9LON4VN1	GGTGGTTCAGTGGTAGAATTCTCGCCTGCC	i-tRF	0	0	16	51	26	27	0	0	0	0	0	0	0	0	0	0	0	47	12	0
tRF#24-EE4O3QW60W	ACGATCTCAACCTATTCTCAAACT	5_U_tRF	0	0	14	42	11	0	15	0	23	0	0	0	11	0	21	19	0	10	0	13
tRF#21-P66Y54J40	GCCCAGGCTGGAGTGCAGTGG	3_U_tRF	0	0	0	0	0	179	0	0	0	0	0	0	0	0	0	0	0	0	0	0
tRF#35-PW5SVP9N15WV7W	GCCGTGATCGTATAGTGGTTAGTACTCTGCGTTGT	5_tRNA_halve	15.003	0	0	20.997	0	67.995	0	0	0	0	0	0	0	0	0	0	0	58.995	16.002	0
tRF#23-K87SIRMMY	CCCGGGTTCGATTCCCGGTCAGG	i-tRF	12	0	20	21	20	0	21	0	0	0	0	0	0	0	0	60	0	0	23	0
tRF#23-F8YKIR9N05	AGCGGTTAGGATTCCTGGTTTTC	i-tRF	176	0	0	0	0	0	0	0	0	0	0	0	0	0	0	0	0	0	0	0
tRF#35-QNR8VP9LFQFY39	GCGTTGGTGGTATAGTGGTAAGCATAGCTGCCTTC	5_tRNA_halve	11	0	0	43	13	0	15	0	0	0	0	0	0	0	10	15	0	30	15	24
tRF#21-WRD81H93E	TCTCCAATGGAGGCGTGGGTT	i-tRF	0	0	34	12	34	30	11	0	34	0	0	0	0	0	0	0	0	0	0	21
tRF#18-Q81V18DM	GCTGGAGTGCAGTGGCGC	3_U_tRF	0	0	0	20	0	146	0	0	0	0	0	0	0	0	0	0	0	0	10	0
tRF#43-PNR8YP9LON4VN1EHDX	GCATTGGTGGTTCAGTGGTAGAATTCTCGCCTGCCACGCGGGA	5_tRF	0	0	0	77	0	0	14	0	0	31.997	30.002	0	0	0	0	23	0	0	0	0
tRF#30-32VIJMRPFQJD	CCGGATAGCTCAGTCGGTAGAGCATCAGAC	5_tRF	0	0	82.998	40.002	0	10.998	0	0	0	0	0	0	0	0	0	0	0	22.002	0	19.998
tRF#26-7343RX6NMHD	GTGGTCTAGTGGTTAGGATTCGGCGC	i-tRF	68	0	0	0	83	0	0	0	0	0	0	0	0	0	0	0	0	24	0	0
tRF#18-YRR6RBD2	TTCCCGGTCAGGGAACCA	3_tRF	0	0	46	0	0	0	17	0	0	0	0	0	22	69	0	21	0	0	0	0
tRF#21-3WOZZMNZE	CCTGTGACTTTTGTCCTTTTT	3_U_tRF	20	25	34	31	0	0	0	0	0	0	0	0	0	0	0	0	0	0	27	38
tRF#28-3SY3H3RXSMDJ	CCTCGTTAGTATAGTGGTTAGTATCCCC	5_tRF	0	0	0	0	0	0	0	144	19	0	12	0	0	0	0	0	0	0	0	0
tRF#33-623K7SIR3DR2DV	GGAGACCGGGGTTCGATTCCCCGACGGGGAGCC	3_tRF	60.996	0	9.996	11.004	0	20.004	15	0	0	0	0	0	0	0	0	26	0	17.004	0	14.004
tRF#19-R4L2RR1Y	GGGTGCGAGAGGTCCCGGG	i-tRF	0	13	18	0	0	0	0	0	0	0	0	0	22	37	23	0	0	0	0	61
tRF#31-XUK87SIRMJ6VB	TGCGACCCGGGTTCGATTCCCGGGCGGCGCA	3_tRF	10	0	10	27	0	0	0	0	36	0	20	0	0	0	0	49	0	0	11	11
tRF#25-RPM8309MUK	GGTAGCGTGGCCGAGTGGTCTAAGG	5_tRF	0	0	26	99	0	0	0	0	0	0	0	0	12	13	0	0	0	0	0	24
tRF#30-FKWYR1OD5721	AGAGGTCTTGGGGCCGAAACGATCTCAACC	5_U_tRF	0	0	0	61	0	45	11	14	0	0	0	0	0	20	12	11	0	0	0	0
tRF#33-PUDP4PZKFJ7PW	GCCGAAATAGCTCAGTTGGGAGAGCGTTAGACT	5_tRF	101.997	0	0	0	0	0	0	0	0	0	0	0	0	0	0	0	0	10.003	61.999	0
tRF#34-SP5830MMUKLYHE	GTCAGGATGGCCGAGCGGTCTAAGGCGCTGCGTT	5_tRF	78.001	0	0	21	0	0	0	0	0	0	0	0	0	0	0	0	0	53	11	10
tRF#23-LYKK7V970Q	CGCTGCCAGGGTTGCTGTCTTTT	3_U_tRF	29	0	22	49	25	0	12	0	0	0	0	0	0	26	10	0	0	0	0	0
tRF#46-F91SS2P46INO86RM7KE	AGCTCAGTCGGTAGAGCATGGGACTCTTAATCCCAGGGTCGTGGGT	i-tRF	0	0	0	152.001	0	0	0	20.001	0	0	0	0	0	0	0	0	0	0	0	0
tRF#27-JM8LHYD33UN	CAGTCTCATAATCTGAAGGTCCTGAGT	i-tRF	0	0	42	45	54	0	18	0	0	0	0	0	0	0	0	0	0	0	0	13
tRF#32-YSV4V47Q2WW15	TTCCGTAGTGTAGTGGTTATCACGTTCGCCTC	5_tRNA_halve	144.999	0	0	0	0	0	0	0	0	0	0	0	0	0	0	0	0	16.002	10.998	0
tRF#23-RWF918V0DN	GGTGTAGCTCAGTGGTAGAGCGT	5_tRF	0	0	15	34	12	0	0	0	0	0	0	0	36	22	15	11	0	0	0	26
tRF#25-F766047B0R	AGCCTGGCCAACATGGTGAAACCCC	5_U_tRF	0	0	0	32	0	139	0	0	0	0	0	0	0	0	0	0	0	0	0	0
tRF#23-I8RZKSLP0E	ATTGGGGTTTCCCCGCGCAGGTT	i-tRF	0	0	0	0	0	0	0	30.999	39	66	23.001	11.001	0	0	0	0	0	0	0	0
tRF#20-43RX6NMH	CTAGTGGTTAGGATTCGGCG	i-tRF	30	0	20	21	0	0	0	0	0	0	0	0	11	11	12	10	0	22	21	12
tRF#22-3BEE4O3Q5	CCGAAACGATCTCAACCTATTC	5_U_tRF	0	0	23	44	0	0	21	20	0	14	0	15	0	0	0	21	0	0	0	12
tRF#20-QSD2NSWW	GCTCGAAGGACTTCGTCTGT	3_U_tRF	27	0	0	0	0	0	0	61	50	19	0	13	0	0	0	0	0	0	0	0
tRF#22-93Q01M3KQ	TGGGTGCGAGAGGTCCCGGGTT	i-tRF	15	0	34.998	28.998	0	0	10.002	0	0	0	0	0	11	50	0	0	0	0	0	19.998
tRF#28-MIF91SS2P4X	CGGCTAGCTCAGTCGGTAGAGCATGAGA	5_tRF	0	0	40.002	31.002	16.002	33	0	24	0	0	0	0	14	0	0	11	0	0	0	0
tRF#22-RSM3WEKSO	GGTCGCGGGTTCGATCCCCGTA	i-tRF	0	0	0	0	0	0	0	0	0	0	17	60	0	0	0	0	0	92	0	0
tRF#25-738E85N9RH	GTGGTTCAATTCCACCTTTCGGGCG	3_tRF	0	0	0	0	0	0	0	0	22	111	20	16	0	0	0	0	0	0	0	0
tRF#29-MY73H3RUPLIP	CGTTGGTGGTATAGTGGTGAGCATAGCTG	5_tRF	0	0	55.002	55.998	0	0	16.998	0	0	0	0	0	0	10	0	11	0	0	0	19.998
tRF#22-V47Q2WW15	TAGTGGTTATCACGTTCGCCTC	i-tRF	106	17	0	0	0	0	0	0	0	0	0	0	0	0	0	0	0	15	10	20
tRF#38-Z46DD8282K69RQ0Q	TTGTGGGAACAATGGCACGGCAAGGGGCTCGGTATTTT	3_U_tRF	0	0	12	59	0	28	0	0	0	0	0	0	0	0	42	27	0	0	0	0
tRF#25-08R959KUMK	ACCGGGGTTCGATTCCCCGACGGGG	3_tRF	18	0	0	0	0	0	0	0	16	134	0	0	0	0	0	0	0	0	0	0
tRF#21-N1EH6KK80	CTGCCACGCGGGAGGCCCGGG	i-tRF	0	0	0	0	0	0	0	50	0	105	12	0	0	0	0	0	0	0	0	0
tRF#20-MJJ2ZBEZ	CGGGCCAGGATTGAAACTTT	3_U_tRF	47	38	0	0	0	0	0	0	0	0	0	0	0	22	25	22	0	0	13	0
tRF#35-V0JUO9YE4PRS93	TAGAGCATGAGACTCTTAATCTCAGGGTCGTGGGT	i-tRF	10.003	0	10.997	24.997	0	0	0	0	0	47.999	0	17.003	17	0	11	12	0	0	0	15.001
tRF#21-I2UKJ6P9D	ATGGATAAGGCATCAGCCTCC	i-tRF	0	0	19	28	18	0	10	0	0	0	0	0	0	0	0	0	0	43	0	48
tRF#24-V4V47Q2WHM	TAGTGTAGTGGTTATCACGTCTGC	i-tRF	0	0	57	17	17	0	25	0	0	0	0	0	27	0	0	0	0	0	0	22
tRF#28-MXSL735L8RDV	CGTTAGTATAGTGGTGAGTATCCCCGCC	5_tRF	22	0	11	0	0	0	0	0	0	0	0	0	22	92	0	0	0	0	18	0
tRF#30-IKE7UMKKSWRN	ATGGGACTCTTAATCCCAGGGTCGTGGGTT	i-tRF	30	0	24	32	0	18	0	0	0	0	0	0	0	12	0	23	0	16	10	0
tRF#36-Z41DD8282K63ZNE	TTGTGAGGACAATGGCACGGCAAGGGGAGTTTGTTT	3_U_tRF	0	0	23	36	0	56	0	0	0	0	0	0	0	20	18	0	0	0	0	11
tRF#27-R918VBY9PYJ	GGTTCAGTGGTAGAATTCTCGCCTGCC	i-tRF	0	0	29	41	29	0	18	0	0	0	0	0	0	0	0	0	0	29	0	17
tRF#20-12RXXNBZ	AGGGAGGTTATGATTAACTT	3_U_tRF	0	0	0	0	0	0	0	0	42	0	59	62	0	0	0	0	0	0	0	0
tRF#20-7EMQ18Y3	GTGATCGTATAGTGGTTAGT	5_tRF	18	10.998	20.997	0	26.001	0	14.004	0	0	0	0	0	0	36	0	16	0	0	0	20.997
tRF#22-V47PU9XWP	TAGTGGTTAGTACTCTGCGTTG	i-tRF	0	0	45	14.004	10	0	63.999	0	0	0	0	0	0	14	0	15	0	0	0	0
tRF#21-83RPD9W1E	TCAGTGGTAGAATTCTCGCCT	i-tRF	121	0	0	0	0	0	0	0	0	0	0	0	0	0	0	0	0	27	14	0
tRF#20-B11KWH19	AAACCAGGGGTCGCGAGTTC	i-tRF	150	0	0	0	0	0	0	0	0	0	0	0	0	0	0	0	0	0	12	0
tRF#37-5QKDN6QQ1362NZO	GATATCCAACCTTCAGCTATAGGGTGGAGACTTTTTA	3_U_tRF	0	0	84	67	0	0	11	0	0	0	0	0	0	0	0	0	0	0	0	0
tRF#23-VP9N15WV0E	TATAGTGGTTAGTACTCTGCGTT	i-tRF	127.998	0	0	15.003	0	0	0	0	0	0	0	0	0	0	0	0	0	18	0	0
tRF#38-43RX6NMH490VL8DJ	CTAGTGGTTAGGATTCGGCGCTCTCACCGCCGCGGCCC	i-tRF	15	0	24	66	0	0	0	0	0	0	0	0	0	0	0	0	0	0	0	56
tRF#22-Z3R918VBQ	TTGGTGGTTCAGTGGTAGAATT	5_tRF	0	0	0	20	14	0	22	0	0	0	0	0	13	23	41	10	0	0	0	18
tRF#25-QD3KYUYRRH	GCGACCCGGGTTCGATTCCCGGGCG	i-tRF	0	0	0	0	0	0	0	13	105	0	20	23	0	0	0	0	0	0	0	0
tRF#26-6RRNLIK8V80	GGCCCGGGTTCGACTCCCGGTATGGG	3_tRF	0	0	0	10	0	46	0	31	0	63	0	11	0	0	0	0	0	0	0	0
tRF#29-K87SERM492E2	CCCGGGTTCGACTCCCGGTGTGGGAACCA	3_tRF	0	0	72	44	0	0	12	0	0	0	0	0	0	17	0	16	0	0	0	0
tRF#35-R008R9D9KUMKF6	GGGAGACCGGGGTTCAATTCCCCGACGGGGAGCCA	3_tRF	0	0	45	79	0	12	0	0	0	14	0	0	0	0	0	11	0	0	0	0
tRF#20-9EDJSYIR	TGGATAAGGCGTCTGATTCC	i-tRF	11.001	0	35.001	20.001	0	0	9.999	0	0	0	0	0	17	34	0	11	0	11.001	0	11.001
tRF#27-4VN1EH6KK8N	CTCGCCTGCCACGCGGGAGGCCCGGGT	i-tRF	0	0	10	0	0	0	0	18	0	96	0	36	0	0	0	0	0	0	0	0
tRF#21-9MVH7P59D	TGGTCTAGCGGTTAGGATTCC	i-tRF	0	0	42	0	22	0	0	0	0	0	0	0	35	36	0	0	0	12	0	13
tRF#21-NO86RM7KE	CTTAATCCCAGGGTCGTGGGT	i-tRF	12	11	15	16	44	0	0	0	0	0	0	0	0	0	0	0	0	29	13	19
tRF#24-RW18V6XOIE	GGTGTAGTGGTATCATGCAAGATT	i-tRF	69	22	0	12	26	0	0	0	0	0	0	0	0	0	0	12	0	18	0	0
tRF#33-N7S3S3RX8HYVD5	CTTCTGTAGTGTAGTGGTTATCACGTTCGCCTC	5_tRNA_halve	16	0	0	94	0	0	0	0	0	0	0	0	0	0	0	0	0	49	0	0
tRF#25-79MP9PMNH5	GTTTCCGTAGTGTAGCGGTTATCAC	5_tRF	33	0	0	12	34	19	0	0	14	32	0	0	0	0	0	0	0	0	15	0
tRF#21-6XQ6S8V0D	GGCTAGCTCAGTCGGTAGAGC	5_tRF	14.004	0	27	16.002	0	23.004	0	0	0	0	0	0	19	35	0	0	0	9.999	0	14.004
tRF#31-R29P4P9L5HJVE	GGGGATGTAGCTCAGTGGTAGAGCGCATGCT	5_tRF	91.002	0	0	0	0	27	0	0	0	0	0	0	0	0	0	0	0	0	12.999	27.003
tRF#20-FP18LPMB	AGCAGAGTGGCGCAGCGGAA	5_tRF	91.996	0	14.004	16	17.001	0	0	0	0	0	0	0	0	0	0	0	0	0	0	18.999
tRF#36-897PVP9N1QKS3WD	TCCTCGTTAGTATAGTGGTTAGTATCCCCGCCTGTC	5_tRNA_halve	55	0	0	24	0	0	0	0	0	0	0	0	0	0	0	0	0	59	20	0
tRF#43-79MP9P9MH57S3O2VD6	GTTTCCGTAGTGTAGTGGTCATCACGTTCGCCTAACACGCGAA	5_tRF	17	0	30	111	0	0	0	0	0	0	0	0	0	0	0	0	0	0	0	0
tRF#22-F1M38E8SM	AGACCCGGGTTCAATTCCCGGC	i-tRF	0	0	0	0	0	0	0	21	0	100	23	0	0	0	0	0	0	0	13	0
tRF#23-M3WE8SSPDX	CGGGTTCGATTCCCGGTCAGGGA	3_tRF	0	0	0	0	0	0	0	0	42.993	21.996	15.003	31.995	0	17	0	28	0	0	0	0
tRF#25-RKIP4OI3FJ	GGGGGATTAGCTCAAATGGTAGAGC	5_tRF	52	0	0	0	0	0	0	36	17	11	0	28	0	0	0	0	0	12	0	0
tRF#34-PSQP4PW3FJIKE5	GCCCGGCTAGCTCAGTCGGTAGAGCATGGGACTC	5_tRNA_halve	59.001	0	14.001	18	0	0	9.999	0	0	0	0	0	0	0	0	0	0	54.999	0	0
tRF#21-MN1E8Y7ZD	CGGTTAGGATTCCTGGTTTTC	i-tRF	104	0	11	10	11	0	0	0	0	0	0	0	0	0	0	0	0	10	10	0
tRF#28-7KYUSRHYRSD2	GTGGGTTCGAGTCCCATCTGGGTCGCCA	3_tRF	0	0	87	0	0	0	69	0	0	0	0	0	0	0	0	0	0	0	0	0
tRF#31-LM8D4N4OEZB40	CGATCTCAACCTATTCTCAAACTTTAAATGG	5_U_tRF	17	0	23	0	0	55	16	0	0	0	0	0	0	10	0	16	0	0	0	19
tRF#24-QWU1O078JZ	GCTGTTAACCGAAAGGTTGGTGGT	i-tRF	0	0	15	40	0	16	0	36	0	0	0	33	0	0	0	0	0	0	0	15
tRF#25-Q1Q89P9L84	GCGCCGCTGGTGTAGTGGTATCATG	5_tRF	58	0	48	24	0	0	0	0	0	0	0	0	0	0	0	10	0	15	0	0
tRF#27-18LPMBQ4NKJ	AGTGGCGCAGCGGAAGCGTGCTGGGCC	i-tRF	79.002	0	0	10.998	0	0	0	0	0	0	0	0	0	0	0	0	0	43.002	9.999	11.997
tRF#32-ON4VN1EH6KK8N	GAATTCTCGCCTGCCACGCGGGAGGCCCGGGT	i-tRF	0	0	11	12	0	0	0	0	29	89	0	13	0	0	0	0	0	0	0	0
tRF#30-JYP940KK5Y93	CATTGGCCTCCTAAGCCAGGGATTGTGGGT	i-tRF	0	0	18	31	0	58	0	0	0	0	0	12	0	0	0	0	0	23	0	12
tRF#23-9M8O90Q4DZ	TGGTCTCCAATGGAGGCGTGGGT	i-tRF	0	0	16	109	0	16	0	0	0	0	0	0	0	0	0	0	0	0	0	12
tRF#18-WE8SSPDX	TCGATTCCCGGTCAGGGA	3_tRF	0	0	0	0	0	0	0	0	0	0	49	104	0	0	0	0	0	0	0	0
tRF#20-MEJB5Y13	CGGATCAGAAGATTGAGGGT	i-tRF	38.997	12.999	45.003	23.002	21	0	0	0	0	0	0	0	0	0	0	0	0	0	0	11.998
tRF#20-9N15WV7W	TGGTTAGTACTCTGCGTTGT	i-tRF	36.999	0	11.997	36.999	0	0	0	0	0	0	0	0	0	0	0	0	0	18	27.999	20.997
tRF#26-WP9N1EWJQ7D	TCTAGTGGTTAGGATTCGGCGCTCTC	i-tRF	113	0	0	0	0	0	0	0	0	0	0	0	0	0	0	0	0	29	10	0
tRF#24-73V2Y8L9J1	GTGGTTAGGATTCGGCGCTCTCAC	i-tRF	0	0	23	0	0	41	11	0	0	0	0	0	30	12	0	11	0	0	0	24
tRF#22-1EWJQ72SJ	AGGATTCGGCGCTCTCACCGCC	i-tRF	0	0	67	0	0	0	14	0	0	0	0	0	28	33	0	0	0	0	0	10
tRF#27-3L7L73V6M9M	CCGTAGTGTAGTGGTTATCACGTTCGC	5_tRF	0	0	45	37	14	0	0	0	0	0	0	0	0	0	0	0	0	0	0	56
tRF#25-LM8D4N4OEZ	CGATCTCAACCTATTCTCAAACTTT	5_U_tRF	0	0	24	41	20	0	19	0	0	0	0	0	0	12	17	19	0	0	0	0
tRF#27-HWH3RXSINHQ	ATCGTATAGTGGTTAGTACTCTGCGTT	i-tRF	93.996	0	16.002	0	0	0	11.997	0	0	0	0	0	0	0	0	0	0	29.997	0	0
tRF#23-9N1QKS3WD1	TGGTTAGTATCCCCGCCTGTCAC	i-tRF	0	0	32	66	0	0	23	0	0	0	0	0	0	0	0	0	0	0	0	30
tRF#19-LP7SDRKD	CGCAGGTTCGAATCCTGTC	i-tRF	0	0	0	0	0	0	0	73	0	59	0	19	0	0	0	0	0	0	0	0
tRF#31-94SX73V2Y8L9E	TGGTGGTCTAGTGGTTAGGATTCGGCGCTCT	5_tRNA_halve	29	0	0	14	0	0	0	0	0	0	0	0	0	0	0	0	0	90	17	0
tRF#22-HEPURYX35	ATAATGCCGAGGTTGTGAGTTC	i-tRF	84	11	0	0	0	0	0	0	0	0	0	0	0	0	0	0	0	19	36	0
tRF#33-0P58309NDJ78W	ACCAGGATGGCCGAGTGGTTAAGGCGTTGGACT	5_tRF	52	0	0	0	0	0	0	0	0	0	0	0	0	0	0	0	0	43	55	0
tRF#27-N3R718YKISM	CTGGTGGTCTAGTGGTTAGGATTCGGC	5_tRF	16	0	38	25	0	0	14	0	0	0	0	0	0	18	0	19	0	0	0	19
tRF#24-NPJV50SJIX	CTTAGCATGCGAGAGGTAGCGGGA	i-tRF	0	0	0	0	0	0	0	36	14	86	0	13	0	0	0	0	0	0	0	0
tRF#29-W60XY9BIYBJY	TCTCAACCTATTCTCAAACTTTAAATGGG	5_U_tRF	0	0	26	52	0	71	0	0	0	0	0	0	0	0	0	0	0	0	0	0
tRF#26-21V98BNXD80	CAACCTATTCTCAAACTTTAAATGGG	5_U_tRF	11	0	0	34	0	25	0	0	10	0	0	0	11	0	0	58	0	0	0	0
tRF#32-SP5830MMUKLYK	GTCAGGATGGCCGAGCGGTCTAAGGCGCTGCG	5_tRF	0	0	27.999	0	0	0	12.996	0	0	32.004	0	0	0	23	10	31	0	11.997	0	0
tRF#21-5P4PW3FJB	GATAGCTCAGTCGGTAGAGCA	i-tRF	24.997	0	31.003	0	30.002	0	0	16.002	10.997	0	0	0	15	0	0	20	0	0	0	0
tRF#25-WP9N1EWJQ7	TCTAGTGGTTAGGATTCGGCGCTCT	i-tRF	47	0	0	15	0	0	0	0	0	0	0	0	0	0	0	0	0	48	38	0
tRF#34-P4R8YP9LON4VHM	GCATGGGTGGTTCAGTGGTAGAATTCTCGCCTGC	5_tRNA_halve	0	0	10	61	0	0	25	0	0	0	0	0	0	0	0	0	0	36	0	16
tRF#25-MB0F4BBM3Z	CGGAAACACACTAAAAAATCCCTTT	3_U_tRF	65	22	18	0	0	0	0	0	0	0	0	0	0	0	0	0	0	0	43	0
tRF#20-4KRQ59W3	CTAGGGGTATGATTCTCGGT	i-tRF	17	0	35	39	10	0	0	0	0	0	0	0	0	0	0	0	0	0	0	47
tRF#33-N6B7SJ97FUJ004	CTTCAAACCTGTAGCTGTCTAGCGACAGAGTGG	i-tRF	0	0	0	0	0	0	0	0	36	57	22	33	0	0	0	0	0	0	0	0
tRF#17-08Q2B52	ACCGGGCGGAAACACCA	3_tRF	0	0	33.008	0	78	0	10	0	0	0	0	0	0	0	0	0	0	12	0	14
tRF#22-ZRS3S3RX5	TTTCCGTAGTGTAGTGGTTATC	5_tRF	55	13	14	37	0	0	14	0	0	0	0	0	0	0	0	0	0	0	0	14
tRF#20-5P4PW3FJ	GATAGCTCAGTCGGTAGAGC	i-tRF	0	0	24.003	10.003	0	32	0	0	0	24.997	0	21.997	13	10	0	11	0	0	0	0
tRF#22-8B8871K92	TCAAATCCGGGTGCCCCCTCCA	3_tRF	0	0	76	18	14	0	0	0	0	25	0	14	0	0	0	0	0	0	0	0
tRF#27-HJ839L5F823	ATAGCTCAGTTGGTAGAGCATCAGACT	i-tRF	0	0	0	0	0	0	0	43	35	34	12	23	0	0	0	0	0	0	0	0
tRF#21-0XY9BIYBE	ACCTATTCTCAAACTTTAAAT	5_U_tRF	28	0	11	31	35	0	16	0	0	0	0	0	0	0	0	0	0	0	12	14
tRF#20-VIJNRPF8	TAGCTCAGTTGGTAGAGCGG	i-tRF	10	0	0	0	0	0	0	0	18	89	0	20	0	0	0	0	0	0	10	0
tRF#25-MEF91SS2PM	CGGATAGCTCAGTCGGTAGAGCATC	5_tRF	0	0	34.998	12	10.998	0	0	0	0	0	0	0	22	26	17	14	0	0	0	10.002
tRF#20-QN7JLP21	GCGTTGTGGCCGCAGCAACC	i-tRF	0	0	29.997	0	19.998	29.997	0	0	23.004	0	0	15.003	0	0	0	0	0	0	0	28.998
tRF#20-P5QK11M3	GCCACGCGGGAGGCCCGGGT	i-tRF	0	0	21	13	0	0	0	0	0	98	0	0	0	0	0	0	0	14	0	0
tRF#24-H3RUSMKVHN	ATAGTGGTGAGTATCCCCGCCTGT	i-tRF	0	0	0	37	24	0	0	0	0	0	15	0	0	0	0	0	0	37	15	18
tRF#20-E9XFJ97Z	ACTTCTGACACATTCGTTTT	3_U_tRF	39	0	22	46	0	0	10	0	0	0	0	0	0	0	0	0	0	0	29	0
tRF#22-WR645J7KQ	TCTCCGGATGGAGGCGTGGGTT	i-tRF	0	0	31	35	0	0	25	0	0	0	0	0	10	0	13	10	0	12	0	10
tRF#33-QKF1R38E8RO8DX	GCGGGAGACCGGGGTTCAATTCCCCGACGGGGA	3_tRNA_halve	0	0	11	74	0	29	0	0	0	11	0	0	0	0	0	21	0	0	0	0
tRF#29-LM8D4N4OEZ07	CGATCTCAACCTATTCTCAAACTTTAAAT	5_U_tRF	15	0	14	19	12	14	14	0	0	0	0	0	10	0	12	20	0	0	0	16
tRF#22-15VF7ZODQ	AGTACTAGCAGTTTTGAAACTT	3_U_tRF	0	0	0	0	0	0	0	0	28	0	56	43	0	0	0	0	0	0	0	18
tRF#31-RPM8309MUKLY0	GGTAGCGTGGCCGAGTGGTCTAAGGCGCTGG	5_tRF	30	0	19	0	12	0	0	0	0	0	0	0	0	40	12	0	0	17	0	15
tRF#26-1WSP58309ME	AGTGTGTCAGGATGGCCGAGTGGTCT	5_U_tRF	70	29	0	0	13	0	0	0	0	0	0	0	0	0	0	10	0	12	11	0
tRF#50-86J8WPMN1E8Y7Z2R1HPS	TCCCACATGGTCTAGCGGTTAGGATTCCTGGTTTTCACCCAGGCGGCCCG	5_tRF	0	0	0	14	0	0	31	0	0	14	0	0	58	0	0	28	0	0	0	0
tRF#29-PUBUW60XY90R	GCCGAAACGATCTCAACCTATTCTCAAAC	5_U_tRF	0	0	0	71	0	0	0	0	0	19	0	10	10	17	0	18	0	0	0	0
tRF#43-QNR8VP94FQFY392JZ	GCGTTGGTGGTATAGTGGTGAGCATAGCTGCCTTCCAAGCAGT	5_tRF	0	0	27	24	0	0	16.002	0	0	0	0	0	12	21	0	44	0	0	0	0
tRF#28-6NMH490VL8DJ	GGATTCGGCGCTCTCACCGCCGCGGCCC	i-tRF	0	0	78	38	0	0	17	0	0	0	0	0	0	0	0	0	0	0	0	11
tRF#25-Z3R918VBY9	TTGGTGGTTCAGTGGTAGAATTCTC	5_tRF	0	0	13	0	0	0	19	36	65	0	0	0	0	0	0	0	0	0	0	11
tRF#19-HJ839LH9	ATAGCTCAGTTGGTAGAGC	i-tRF	0	0	0	0	0	0	0	55.998	0	25.002	0	51	0	0	0	0	0	12	0	0
tRF#26-S3S3RX8HYVD	GTAGTGTAGTGGTTATCACGTTCGCC	i-tRF	32	0	18	25	0	0	12	0	0	0	0	0	0	11	0	0	0	23	0	22
tRF#25-OUR8309NDJ	GACGAGGTGGCCGAGTGGTTAAGGC	5_tRF	52.997	0	14	0	14	10.003	0	0	0	51.002	0	0	0	0	0	0	0	0	0	0
tRF#30-Z3R918VBY9PY	TTGGTGGTTCAGTGGTAGAATTCTCGCCTG	5_tRNA_halve	0	0	26	53	0	0	11	0	0	0	0	0	0	0	0	0	0	10	10	32
tRF#18-H7Q6JHD2	ATCCTGCTCACAGCGCCA	3_tRF	0	0	42.999	23.001	40.998	0	35.001	0	0	0	0	0	0	0	0	0	0	0	0	0
tRF#32-YSV4V47Q2WW1O	TTCCGTAGTGTAGTGGTTATCACGTTCGCCTA	5_tRNA_halve	141.995	0	0	0	0	0	0	0	0	0	0	0	0	0	0	0	0	0	0	0
tRF#22-XMSL73VL3	TGATCGTATAGTGGTTAGTACT	5_tRF	46	0	0	10	39	36	0	10	0	0	0	0	0	0	0	0	0	0	0	0
tRF#21-KIWU2QWNE	CCACTTCTGACACATTCGTTT	3_U_tRF	32	0	0	0	0	0	0	0	0	0	0	0	0	0	0	0	0	0	109	0
tRF#24-F766047BEJ	AGCCTGGCCAACATGGTGAAACCC	5_U_tRF	0	0	0	0	0	141	0	0	0	0	0	0	0	0	0	0	0	0	0	0
tRF#25-SVKKN27F7J	GTCGCCCAGGCTGGAGTGCAGTGGC	3_U_tRF	0	0	0	0	0	74	11	0	0	0	0	0	56	0	0	0	0	0	0	0
tRF#30-389MV47P596V	CCTGGTGGTCTAGTGGTTAGGATTCGGCGC	5_tRF	30	0	10	18	22	0	0	0	0	0	0	0	12	0	0	21	0	13	0	14
tRF#29-I83RUJJKIWIZ	ATTGGCCTCCTAAGCCAGGGATTGTGGGT	i-tRF	0	0	22	40	0	0	0	0	27	18	0	14	0	0	0	0	0	19	0	0
tRF#24-9N2NK1ZSI8	TGGTTCAATTCCACCTTTCGGGCG	3_tRF	0	0	13	0	0	18	0	0	32	77	0	0	0	0	0	0	0	0	0	0
tRF#33-RRJ89O9NF5W8W	GGTCCCATGGTGTAATGGTTAGCACTCTGGACT	5_tRF	130	0	0	0	0	0	0	0	0	0	0	0	0	0	0	0	0	10	0	0
tRF#33-R29P4P9L5HLV05	GGGGATGTAGCTCAGTGGTAGAGCGCGCGCTTC	5_tRNA_halve	107	0	0	0	0	0	0	0	0	0	0	0	0	0	0	0	0	0	33	0
tRF#20-64L2RRM3	GGATGCGAGAGGTCCCGGGT	i-tRF	12	12	58	0	12	0	25	0	0	0	0	0	0	0	0	0	0	0	0	21
tRF#32-J8O9YEKPRS935	CATGGGACTCTTAATCCCAGGGTCGTGGGTTC	i-tRF	0	0	0	0	0	129.999	0	0	0	0	0	0	0	0	0	0	0	9.999	0	0
tRF#34-IEWSNYRV50SRIZ	ATGATTCTCGCTTTGGGTGCGAGAGGTCCCGGGT	i-tRF	0	0	33	19.002	0	0	31.002	0	0	0	0	0	0	0	11	18	0	0	0	27
tRF#21-WPRLXN4VE	TCTAGGGGTATGATTCTCGCT	i-tRF	0	0	39	15	0	0	0	0	0	0	0	0	20	24	14	0	0	0	0	27
tRF#26-17JOWU1M70E	AGTCTCATAATCTGAAGGTCGTGAGT	i-tRF	0	0	42	13	41	0	11	0	0	0	0	0	0	0	0	0	0	12	0	20
tRF#22-79MP9PMNI	GTTTCCGTAGTGTAGCGGTTAT	5_tRF	41	0	21	0	11	0	11	0	0	0	0	0	0	0	0	0	0	12	21	22
tRF#50-Q99P9P9NH57S362VO0SR	GCTTCTGTAGTGTAGTGGTTATCACGTTCGCCTCACACGCGAAAGGTCCC	5_tRF	0	0	0	30	0	0	23	0	0	86	0	0	0	0	0	0	0	0	0	0
tRF#23-47D112Z4DZ	CTCCTAAGCCAGGGATTGTGGGT	i-tRF	0	0	0	0	0	0	0	32	40	55	0	0	0	0	0	0	0	0	0	11
tRF#33-FN5KYUSRYWRSD2	AGATTGAGGGTTCGAGTCCCTTCGTGGTCGCCA	3_tRF	0	0	96	0	0	0	42	0	0	0	0	0	0	0	0	0	0	0	0	0
tRF#18-KDI3ODDJ	CCAACATGGTGAAACCCC	5_U_tRF	23	0	0	0	0	114	0	0	0	0	0	0	0	0	0	0	0	0	0	0
tRF#19-2NK1ZSI8	CAATTCCACCTTTCGGGCG	3_tRF	0	0	0	0	0	0	0	0	35	59	32	10	0	0	0	0	0	0	0	0
tRF#23-N93VUIRI0Q	CTTTCCCTGCTAACTGGGCTTTT	3_U_tRF	25	0	40	37	0	0	16	0	0	0	0	0	0	0	0	0	0	0	18	0
tRF#26-789LV470JPD	GTTGGTGGTATAGTGGTGAGCATAGC	5_tRF	0	0	10.998	12	25.998	0	16.998	0	0	0	0	0	18	0	28	24	0	0	0	0
tRF#21-87R8WP9NB	TCCCTGGTGGTCTAGTGGTTA	5_tRF	55	0	23	0	26	16	0	0	0	0	0	0	0	15	0	0	0	0	0	0
tRF#23-W60XY9BI0O	TCTCAACCTATTCTCAAACTTTA	5_U_tRF	0	17	27	42	0	0	21	0	0	0	0	0	14	14	0	0	0	0	0	0
tRF#33-R118LO9EBVSYW	GGGCCAGTGGCGCAATGGATAACGCGTCTGACT	5_tRF	64.995	0	0	0	0	0	0	0	0	0	0	0	0	0	0	0	0	49	10.003	10.997
tRF#34-RKVP4P9L5FZUHM	GGGGGTATAGCTCAGTGGTAGAGCATTTGACTGC	5_tRNA_halve	102	0	0	0	0	0	0	0	0	0	0	0	0	0	0	0	0	10	22	0
tRF#33-79MP9P9NIQ7SD3	GTTTCCGTAGTGTAGTGGTTATTATGTTCGCCT	5_tRF	100	0	0	0	0	0	0	0	0	0	0	0	0	0	0	0	0	24	10	0
tRF#20-Z4R95MKM	TTGTGGGTTCGAGTCCCATC	i-tRF	25	0	0	0	0	0	0	0	0	0	0	0	0	0	0	0	0	71	17	21
tRF#21-DRJFNY6KD	AATCCCAGCACTTTGGGAGGC	3_U_tRF	64.998	0	0	14.001	9.999	44.999	0	0	0	0	0	0	0	0	0	0	0	0	0	0
tRF#29-P27JPJ60MVJY	GCAGAGTGGCGCAGCGGAAGCGTGCTGGG	5_tRF	10.998	0	0	0	0	0	0	0	0	60.003	15.003	14.004	0	0	0	0	0	33.003	0	0
tRF#20-FEWS3V2V	AGAATTCTCGCCTGCCACGC	i-tRF	0	0	40	20	16	31	10	0	0	0	0	0	0	0	0	0	0	0	0	16
tRF#29-RPM830MMUK1W	GGTAGCGTGGCCGAGCGGTCTAAGGCGCT	5_tRF	78.003	0	0	0	0	0	0	0	0	26.001	0	0	0	11	0	17	0	0	0	0
tRF#22-79MP9P9MI	GTTTCCGTAGTGTAGTGGTCAT	5_tRF	47	0	34	12	13	0	0	0	0	0	0	0	0	0	0	0	0	10	0	16
tRF#20-1QKS3W2V	AGTATCCCCGCCTGTCACGC	i-tRF	0	0	31	34	0	32	23	0	0	0	0	0	0	0	0	0	0	0	0	12
tRF#23-R84QPYVMD2	GGTGGCTCATGCCTGTAGTCCCA	3_U_tRF	111	0	10	0	0	0	0	0	0	0	0	0	0	0	0	0	0	11	0	0
tRF#18-HSRVK7D2	ATCCGGGTGCCCCCTCCA	3_tRF	0	0	45	0	40	21	11	0	0	0	0	0	0	0	0	0	0	0	0	15
tRF#19-7343RXI7	GTGGTCTAGTGGTTAGGAT	i-tRF	10.998	0	19.998	23.004	12.996	0	0	0	0	0	0	0	0	0	0	0	0	10.998	0	54
tRF#21-34HWH3RX0	CCGTGATCGTATAGTGGTTAG	5_tRF	0	0	0	21.996	0	90	0	0	0	0	0	0	0	0	0	0	0	19.998	0	0
tRF#24-R8WP9N1EJ4	GGTGGTCTAGTGGTTAGGATTCGG	i-tRF	27	0	0	14	0	0	0	0	0	0	0	0	0	0	0	0	0	42	19	29
tRF#29-389MV47P59I8	CCTGGTGGTCTAGTGGTTAGGATTCGGCG	5_tRF	0	0	0	0	0	0	0	0	0	0	0	0	30	28	14	32	0	17	0	10
tRF#27-Z3R918VBY9M	TTGGTGGTTCAGTGGTAGAATTCTCGC	5_tRF	0	0	32	0	0	27	0	72	0	0	0	0	0	0	0	0	0	0	0	0
tRF#28-476YQSL4WW0Q	CTCCTGGCTGGCTCGCGATGTCTGTTTT	3_U_tRF	19	0	15	43	0	0	0	0	0	0	0	0	0	0	10	0	0	0	32	12
tRF#33-K8J7KB8JLHZV0Q	CCCGGCATCTCCAAATCAGCCGACGTTTGCTTT	3_U_tRF	0	0	10	32	0	33	0	0	0	0	0	0	0	0	12	27	0	0	17	0
tRF#20-F9485JXK	AGCTCCTCGGGAGGCTGAGG	3_U_tRF	0	0	0	14	0	107	0	0	0	0	0	0	0	0	0	0	0	0	10	0
tRF#30-QKF1R38E8RO8	GCGGGAGACCGGGGTTCAATTCCCCGACGG	i-tRF	0	0	0	0	0	16	0	22	14	50	0	11	0	0	0	17	0	0	0	0
tRF#34-IEWSNSRV50SRIZ	ATGATTCTCGCTTCGGGTGCGAGAGGTCCCGGGT	i-tRF	0	0	18.999	63	0	0	21.999	0	0	0	0	0	0	15	0	11	0	0	0	0
tRF#20-941QKS3W	TGGTGAGTATCCCCGCCTGT	i-tRF	55	0	0	16	0	0	0	0	0	0	0	0	0	10	0	0	0	21	0	27
tRF#30-QKF1R3WE8RO8	GCGGGAGACCGGGGTTCGATTCCCCGACGG	i-tRF	0	0	0	13	0	34	0	0	0	0	0	0	0	0	0	71	0	11	0	0
tRF#20-9L5HMVYV	TGGTAGAGCGCGTGCTTCGC	i-tRF	21	0	0	0	0	0	0	0	0	0	0	0	21	59	13	0	0	0	0	15
tRF#31-R3HJ83RPFQZDE	GGGGTATAGCTCAGTGGTAGAGCATTTGACT	5_tRF	89	0	0	0	0	0	0	0	0	0	0	0	0	0	0	0	0	22	0	18
tRF#20-MEJB5YJ3	CGGATCAGAAGATTGCAGGT	i-tRF	49	0	23	0	0	0	0	0	0	0	0	0	0	0	0	0	0	0	46	11
tRF#30-PUBUW60XY9BI	GCCGAAACGATCTCAACCTATTCTCAAACT	5_U_tRF	0	0	0	37	15	46	15	0	16	0	0	0	0	0	0	0	0	0	0	0
tRF#42-P5QK11M3WE8SPOX52	GCCACGCGGGAGGCCCGGGTTCGATTCCCGGCCAATGCACCA	3_tRNA_halve	0	0	0	88.998	0	0	0	0	0	0	0	0	0	12	0	28	0	0	0	0
tRF#24-7383RPD9JM	GTGGTTCAGTGGTAGAATTCTCGC	i-tRF	0	0	0	0	0	0	0	72	56	0	0	0	0	0	0	0	0	0	0	0
tRF#22-Q3V2Y7RZ5	GCGGTTAGGATTCCTGGTTTTC	i-tRF	117	0	0	0	0	0	0	0	0	0	0	0	0	0	0	0	0	11	0	0
tRF#30-XMSL73VL4YMY	TGATCGTATAGTGGTTAGTACTCTGCGTTG	5_tRNA_halve	0	0	0	19.998	17.001	0	29.997	21.996	0	0	0	24.003	0	0	0	0	0	15.003	0	0
tRF#35-KY7343RX6NMH49	CCCTGGTGGTCTAGTGGTTAGGATTCGGCGCTCTC	5_tRNA_halve	67	0	0	18	0	0	0	0	0	0	0	0	0	0	0	0	0	42	0	0
tRF#33-4WVLV470VR310N	CTCGTTAGTATAGTGGTGAGTATCCCCGCCTGT	5_tRNA_halve	0	0	0	45	0	0	0	0	0	0	0	33	0	0	0	0	0	0	36	13
tRF#22-7EMQ18Y31	GTGATCGTATAGTGGTTAGTAC	5_tRF	0	0	10.998	0	10.998	19.998	15.003	0	0	0	0	14.004	0	0	0	0	0	29.997	0	26.001
tRF#34-3L7L73V6M9P9E1	CCGTAGTGTAGTGGTTATCACGTTCGCCTCACAC	5_tRNA_halve	0	0	29.997	38.997	0	0	15.003	0	0	0	0	0	0	0	0	0	0	0	0	42.003
tRF#28-V470VR3196DM	TAGTGGTGAGTATCCCCGCCTGTCACGC	i-tRF	0	0	52	21	0	0	19	0	0	0	0	0	0	0	0	0	0	11	0	23
tRF#23-21V98BNX7	CAACCTATTCTCAAACTTTAAAT	5_U_tRF	0	0	12	17	15	0	12	0	0	0	0	0	0	12	31	11	0	0	0	16
tRF#23-PS5P4PW3X	GCCCGGATAGCTCAGTCGGTAGA	5_tRF	22.002	0	21	12	19.002	0	0	0	0	0	0	0	14	15	0	11	0	10.998	0	0
tRF#28-947673FEWSD3	TGGTGGTTCAGTGGTAGAATTCTCGCCT	5_tRF	16.36	0	0	20	0	0	0	0	0	0	0	0	0	0	0	0	0	36.36	51.82	0
tRF#27-8YQ84V5WNNQ	TCCTGGCTGGCTCGCGATGTCTGTTTT	3_U_tRF	26	0	15	56	0	0	0	0	0	0	0	0	0	0	0	0	0	0	27	0
tRF#22-LYKK7V97Q	CGCTGCCAGGGTTGCTGTCTTT	3_U_tRF	43	10	0	28	0	0	0	0	0	0	0	0	0	14	0	14	0	0	15	0
tRF#43-7L73HQP0IRJ9ZH0SDZ	GTGTAGTGGTATCATGCAAGATTCCCATTCTTGCGACCCGGGT	i-tRF	0	0	15	71	0	15	0	0	0	10	0	0	0	0	0	13	0	0	0	0
tRF#21-KPQ81V18D	CCCAGGCTGGAGTGCAGTGGC	3_U_tRF	0	0	0	0	44	56	24	0	0	0	0	0	0	0	0	0	0	0	0	0
tRF#31-LSM1M3WE8SSP0	CGCCGCGGCCCGGGTTCGATTCCCGGTCAGG	i-tRF	0	0	0	18	0	0	44	0	0	0	0	0	0	0	0	61	0	0	0	0
tRF#35-PNR8YP9LON4VN1	GCATTGGTGGTTCAGTGGTAGAATTCTCGCCTGCC	5_tRNA_halve	35	0	0	36	0	0	0	0	0	0	0	0	0	0	0	0	0	52	0	0
tRF#23-1MQKYU8R0B	AGGTCGCGGGTTCGATCCCCGTA	i-tRF	0	0	0	0	0	0	0	0	0	0	0	0	0	0	0	0	0	94	0	29
tRF#28-86V8WPMN1E0J	TCCCATATGGTCTAGCGGTTAGGATTCC	5_tRF	53	0	26	0	11	0	13	0	0	0	0	0	0	0	0	0	0	10	10	0
tRF#31-QSZ34KRQ59WIE	GCTCGTTGGTCTAGGGGTATGATTCTCGCTT	5_tRF	0	0	0	0	0	0	0	0	16	0	13	26	0	0	0	0	0	0	67	0
tRF#23-YUYRRHQFD2	TTCGATTCCCGGGCGGCGCACCA	3_tRF	0	0	33	46	0	0	0	0	13	0	0	0	30	0	0	0	0	0	0	0
tRF#23-QNR8VP9L9	GCGTTGGTGGTATAGTGGTAAGC	5_tRF	10	0	42	15	0	0	0	0	0	0	0	0	11	0	0	13	0	0	10	21
tRF#28-OD5721V98BDQ	GAAACGATCTCAACCTATTCTCAAACTT	5_U_tRF	0	0	68	31	12	0	11	0	0	0	0	0	0	0	0	0	0	0	0	0
tRF#31-YSV4V4SQ2WW1E	TTCCGTAGTGTAGTGGTCATCACGTTCGCCT	5_tRF	94	0	0	0	0	0	0	0	0	0	0	0	0	0	0	0	0	16	11	0
tRF#34-FJIKE7UMKKSWIZ	AGAGCATGGGACTCTTAATCCCAGGGTCGTGGGT	i-tRF	21	0	27	18	0	0	19	0	0	19	0	0	0	0	0	0	0	0	0	17
tRF#31-QKF1R38E8RO80	GCGGGAGACCGGGGTTCAATTCCCCGACGGG	i-tRF	0	0	0	20	0	31	32	13	0	25	0	0	0	0	0	0	0	0	0	0
tRF#16-QU6P5BE	GCTGAGGCAGGAGAAT	3_U_tRF	13	21	0	32	0	0	0	0	0	0	0	0	0	0	0	0	0	45	10	0
tRF#52-RPM8309MUKLY5Z1IK3JZK	GGTAGCGTGGCCGAGTGGTCTAAGGCGCTGGATTTAGGCTCCAGTCATTTCG	5_tRF	0	0	10	0	0	0	48	0	0	52	0	0	11	0	0	0	0	0	0	0
tRF#32-7RH3S3RX8HWVQ	GTTCCATAGTGTAGTGGTTATCACGTCTGCTT	5_tRF	37	0	0	0	0	0	0	0	0	0	0	0	0	0	0	0	0	62	10	11
tRF#22-SBKKRSL35	GTAAACCAGGGGTCGCGAGTTC	i-tRF	57	0	0	0	0	0	0	0	0	0	0	0	0	0	0	0	0	24	39	0
tRF#22-RW18V6XOL	GGTGTAGTGGTATCATGCAAGA	i-tRF	29	0	29	18	0	0	14	0	0	0	0	0	0	10	0	0	0	0	0	20
tRF#33-QJ3KYU4RRWRBD2	GCGGCCCGGGTTCGACTCCCGGTGTGGGAACCA	3_tRF	0	0	35	52	0	18	0	0	0	0	0	0	0	0	0	0	0	0	0	15
tRF#29-SP5830MMUK1W	GTCAGGATGGCCGAGCGGTCTAAGGCGCT	5_tRF	80.001	9.999	0	0	0	0	0	0	0	0	0	0	0	0	0	0	0	0	0	29.997
tRF#35-3L7L73V6M9P90H	CCGTAGTGTAGTGGTTATCACGTTCGCCTCACACG	5_tRNA_halve	0	0	33.003	31.005	0	0	0	0	0	0	0	0	0	0	0	0	0	0	0	54.999
tRF#22-V47Q2WNIQ	TAGTGGTTATCACGTCTGCTTT	i-tRF	44	12	0	0	0	0	0	0	0	0	0	0	0	0	0	0	0	25	20	18
tRF#20-4ZMKQ4RZ	CTCTTCGGGGGCGTGGGTTT	i-tRF	29	0	11	25	0	0	11	0	0	16	0	13	0	0	0	0	0	0	14	0
tRF#38-9N1EWJQ72S3HPSDZ	TGGTTAGGATTCGGCGCTCTCACCGCCGCGGCCCGGGT	i-tRF	13	0	23	31	0	13	0	0	0	0	0	16	0	0	0	0	0	0	0	23
tRF#20-9ILU977Z	TGGCTCGCGATGTCTGTTTT	3_U_tRF	58	0	23	28	0	0	10	0	0	0	0	0	0	0	0	0	0	0	0	0
tRF#24-PUBUW60XK3	GCCGAAACGATCTCAACCTATTCT	5_U_tRF	0	0	0	39	13	0	14	0	0	42	0	11	0	0	0	0	0	0	0	0
tRF#25-QNR8VP94FQ	GCGTTGGTGGTATAGTGGTGAGCAT	5_tRF	15.001	0	17.997	18.998	0	0	0	0	0	0	0	0	28	18	0	11	0	0	10.003	0
tRF#28-789LV470JPDP	GTTGGTGGTATAGTGGTGAGCATAGCTG	5_tRF	0	0	40.002	19.002	0	0	18	0	0	0	0	0	0	10	17	14	0	0	0	0
tRF#23-7343RX6ND4	GTGGTCTAGTGGTTAGGATTCGG	i-tRF	16	0	0	0	13	31	0	0	0	0	0	0	0	0	0	0	0	18	10	30
tRF#31-9NJ4S2I7L7P50	TGGTTCAGTGGTAGAATTCTCGCCTGCCACG	i-tRF	0	0	32	0	0	0	22	0	0	0	0	0	10	0	0	0	0	0	0	54
tRF#29-ER9I69QESYKQ	ACTCCTGGCTGGCTCGCGATGTCTGTTTT	3_U_tRF	25	17	0	14	0	0	0	0	0	0	0	0	0	0	0	0	0	0	62	0
tRF#32-SP58309MUKL6L	GTCAGGATGGCCGAGTGGTCTAAGGCGCCAGA	5_tRF	11	0	17	31	0	0	0	0	0	0	0	0	14	20	0	11	0	0	0	14
tRF#42-4KRQ59WIZKXU53K8N	CTAGGGGTATGATTCTCGCTTTGGGTGCGAGAGGTCCCGGGT	i-tRF	0	0	11	64	0	0	0	0	12	21	0	0	0	0	0	10	0	0	0	0
tRF#28-L8K87SIRMMY	CGCGGCCCGGGTTCGATTCCCGGTCAGG	i-tRF	0	0	0	12	0	25	0	0	0	54	0	0	0	0	0	26	0	0	0	0
tRF#25-7L73V6M9P9	GTGTAGTGGTTATCACGTTCGCCTC	i-tRF	87	0	0	0	0	0	0	0	0	0	0	0	0	0	0	0	0	18	12	0
tRF#20-79MP9P9M	GTTTCCGTAGTGTAGTGGTC	5_tRF	43	0	33	30	0	0	11	0	0	0	0	0	0	0	0	0	0	0	0	0
tRF#22-R718YKISM	GGTCTAGTGGTTAGGATTCGGC	i-tRF	41	0	17	0	0	0	0	0	0	0	0	0	0	0	0	0	0	14	17	27
tRF#23-N3R718YKDE	CTGGTGGTCTAGTGGTTAGGATT	5_tRF	28	0	14	13	0	22	0	0	0	0	0	0	0	0	0	0	0	0	28	11
tRF#23-RX6NMH49V	GGTTAGGATTCGGCGCTCTCACC	i-tRF	0	0	13	0	10	0	0	0	0	0	0	0	39	22	0	0	0	11	10	11
tRF#32-D9W1X6L85J3KQ	AATTCTCGCCTGCCACGCGGGAGGCCCGGGTT	i-tRF	0	0	22	46	0	0	24	0	0	0	0	0	0	24	0	0	0	0	0	0
tRF#23-LNK8KEP00Q	CGATTCCCGGCCAATGCAAGTTT	3_U_tRF	15	0	0	44	0	0	0	0	0	0	0	0	14	27	0	0	0	0	16	0
tRF#25-X3HRL7S5QK	TGAGTATCCCCGCCTGTCACGCGGG	i-tRF	0	0	116	0	0	0	0	0	0	0	0	0	0	0	0	0	0	0	0	0
tRF#24-0Q37QQM0KQ	ACCATCCTCTGCTATCGGAGTTTT	3_U_tRF	14	14	0	77	0	0	0	0	0	0	0	0	0	0	0	0	0	0	0	11
tRF#22-K5I34JRX4	CCCACATGGTCTAGCGGTTAGG	5_tRF	0	0	10	0	0	0	0	40	17	0	0	49	0	0	0	0	0	0	0	0
tRF#22-RLQ6S8V02	GGGTAGCTCAGTCGGTAGAGCA	5_tRF	0	0	0	0	0	0	0	72	44	0	0	0	0	0	0	0	0	0	0	0
tRF#22-MI7O3B1N4	CGGCTGTTAACCGAAAGGTTGG	i-tRF	15	0	19	0	10	0	12	0	0	0	0	0	10	0	0	0	0	13	0	36
tRF#36-PS5U8918W8RV1IE	GCCCGGATGATCCTCAGTGGTCTGGGGTGCAGGCTT	5_tRNA_halve	23	0	0	0	0	0	0	0	0	0	0	0	0	0	0	0	0	24	13	55
tRF#40-2S3HPSR95933JKB6	CACCGCCGCGGCCCGGGTTCGATTCCCGGTCAGGGAACCA	3_tRNA_halve	0	0	0	64.998	0	0	0	0	0	9.999	0	14.004	0	0	0	0	0	10.998	0	14.004
tRF#23-43BF628YDZ	CTAGTAAACAGGAGATCCTGGGT	i-tRF	0	0	17	0	14	0	11	0	0	37	0	10	0	0	0	0	0	0	0	25
tRF#34-R9JP9P9NH5SYHQ	GGTTCCATAGTGTAGTGGTTATCACGTCTGCTTT	5_tRNA_halve	13	0	0	0	0	0	0	0	0	0	0	0	0	0	0	0	0	67	19	15
tRF#23-6H14PU730F	GGACGAGGTGGCCGAGTGGTTAA	5_tRF	0	0	0	0	0	0	0	14	10	89	0	0	0	0	0	0	0	0	0	0
tRF#21-QFQ2FWQ80	GCGCAGCGGAAGCGTGCTGGG	i-tRF	10.998	0	0	0	0	0	0	0	0	0	34.002	67.995	0	0	0	0	0	0	0	0
tRF#26-N3R718YKIS0	CTGGTGGTCTAGTGGTTAGGATTCGG	5_tRF	0	0	0	17	0	0	0	0	0	0	0	0	0	36	0	0	0	20	17	22
tRF#26-7673FEWS3VD	GTTCAGTGGTAGAATTCTCGCCTGCC	i-tRF	36	0	0	11	0	0	16	0	0	0	0	0	0	0	0	0	0	37	12	0
tRF#25-XN4VZ87HFK	TGATTCTCGCTTTGGGTGCGAGAGG	i-tRF	0	0	16.002	19.002	0	0	0	0	0	0	0	0	14	29	0	0	0	13.998	0	19.998
tRF#23-94V4SMIFX	TGGTGTAGTGGTATCATGCAAGA	i-tRF	11	0	47	0	0	0	13	0	0	0	0	0	0	0	0	0	0	10	0	31
tRF#32-86J8WPMN1E8YN	TCCCACATGGTCTAGCGGTTAGGATTCCTGGT	5_tRF	35	0	11	0	11	0	0	0	0	0	0	0	0	22	12	10	0	11	0	0
tRF#18-7J23ROD9	GTGGCCAAGTGGTAAGGC	i-tRF	0	0	0	0	0	0	0	28	0	84	0	0	0	0	0	0	0	0	0	0
tRF#32-ZPQR17NSRJ7KQ	TTTAGGCTCCAGTCTCTTCGGGGGCGTGGGTT	i-tRF	16	0	0	0	0	0	0	0	0	0	0	0	12	13	26	34	0	0	0	11
tRF#27-QJ3KYUYRR64	GCGGCCCGGGTTCGATTCCCGGTCAGG	i-tRF	0	0	13	18	30	0	19	0	0	0	0	0	0	0	0	31	0	0	0	0
tRF#24-OSRNLNKSE4	GACCGGGGTTCGATTCCCCGACGG	i-tRF	81	10	0	0	0	0	0	0	0	0	0	0	0	0	0	0	0	0	0	20
tRF#33-V470VR3196L8DS	TAGTGGTGAGTATCCCCGCCTGTCACGCGGGAG	i-tRF	13	0	84	14	0	0	0	0	0	0	0	0	0	0	0	0	0	0	0	0
tRF#21-VIJMRPFQD	TAGCTCAGTCGGTAGAGCATC	i-tRF	0	0	0	0	0	0	0	31	0	58	0	22	0	0	0	0	0	0	0	0
tRF#24-3RUJJKIWIZ	CCTCCTAAGCCAGGGATTGTGGGT	i-tRF	0	11	0	0	0	0	0	0	16	57	0	0	0	0	0	0	0	0	0	26
tRF#29-QKF1R3WE8RH8	GCGGGAGACCGGGGTTCGATTCCCCGACG	i-tRF	0	0	12	0	0	67	18	0	0	0	0	0	0	0	0	13	0	0	0	0
tRF#33-1QKS3W2VR008DZ	AGTATCCCCGCCTGTCACGCGGGAGACCGGGGT	i-tRF	0	0	24	0	0	0	0	0	0	86	0	0	0	0	0	0	0	0	0	0
tRF#21-JHOJ7IR1D	CAGCGGAAGCGTGCTGGGCCC	i-tRF	46	0	0	0	14	0	0	0	18	0	21	0	0	0	0	0	0	0	11	0
tRF#31-PS5U8918W8RVB	GCCCGGATGATCCTCAGTGGTCTGGGGTGCA	5_tRF	110	0	0	0	0	0	0	0	0	0	0	0	0	0	0	0	0	0	0	0
tRF#24-R4VIJ4S2I1	GGGTGTAGCTCAGTGGTAGAGCAC	5_tRF	0	0	0	0	0	0	0	66	23	10	0	11	0	0	0	0	0	0	0	0
tRF#27-79MP9P9NH5N	GTTTCCGTAGTGTAGTGGTTATCACGT	5_tRF	22	0	24	11	23	0	0	0	0	0	0	29	0	0	0	0	0	0	0	0
tRF#20-J4S2I7L7	CAGTGGTAGAATTCTCGCCT	i-tRF	92	0	0	0	0	0	0	0	0	0	0	0	0	0	0	0	0	17	0	0
tRF#24-YDLBRY73JL	TTAACCGAAAGGTTGGTGGTTCGA	i-tRF	92	0	0	0	0	0	0	0	0	0	0	0	0	0	0	0	0	0	0	17
tRF#21-HDPORSM3E	ATAACGCCAAGGTCGCGGGTT	i-tRF	0	0	45	21	11	0	0	0	0	0	0	0	0	0	0	0	0	21	0	11
tRF#21-VH7P59N3E	TAGCGGTTAGGATTCCTGGTT	i-tRF	73	0	0	0	0	0	0	0	0	0	10	0	0	0	0	0	0	26	0	0
tRF#29-86V8WPMN1EJ3	TCCCATATGGTCTAGCGGTTAGGATTCCT	5_tRF	51	0	20	38	0	0	0	0	0	0	0	0	0	0	0	0	0	0	0	0
tRF#34-897PVP9N1QKS1P	TCCTCGTTAGTATAGTGGTTAGTATCCCCGCCTG	5_tRNA_halve	0	0	0	33	0	0	10	0	0	34	0	0	0	0	0	0	0	11	0	21
tRF#22-RK9P4P9LL	GGGGGTGTAGCTCAGTGGTAGA	5_tRF	108	0	0	0	0	0	0	0	0	0	0	0	0	0	0	0	0	0	0	0
tRF#20-HJ839L5H	ATAGCTCAGTTGGTAGAGCG	i-tRF	0	0	0	0	0	0	0	40	14	20	12	22	0	0	0	0	0	0	0	0
tRF#20-R32KZKZZ	GGGGTCAAGGTTGGGTTTTT	3_U_tRF	58	50	0	0	0	0	0	0	0	0	0	0	0	0	0	0	0	0	0	0
tRF#35-ZH0SR9593KMH26	TTGCGACCCGGGTTCGATTCCCGGGCGGCGCACCA	3_tRF	0	0	24	27	11	0	0	0	0	0	0	0	0	0	0	12	0	22	0	11
tRF#21-KSLP7SDRE	CCCCGCGCAGGTTCGAATCCT	i-tRF	0	0	0	0	0	0	0	0	0	35	28	44	0	0	0	0	0	0	0	0
tRF#20-18YMENL7	AGTGGTTATCACGTTCGCCT	i-tRF	49	0	0	16	14	0	0	0	0	0	0	0	0	0	0	0	0	27	0	0
tRF#25-87R8WP9I1E	TCCCTGGTGGTCTAGTGGCTAGGAT	5_tRF	17	0	0	15	0	0	0	0	0	0	0	0	0	0	0	74	0	0	0	0
tRF#22-JMRPFQRD5	CAGTCGGTAGAGCATGGGACTC	i-tRF	0	0	43	0	25	0	0	0	0	0	0	0	0	0	0	0	0	22	0	16
tRF#21-LMK8J7K1B	CGATCCCCGGCATCTCCACCA	3_tRF	0	0	38	0	0	0	17	0	0	51	0	0	0	0	0	0	0	0	0	0
tRF#24-18VBY9PY11	AGTGGTAGAATTCTCGCCTGCCAC	i-tRF	0	0	14	23	0	0	11	0	0	0	0	0	12	12	0	0	0	0	13	20
tRF#32-69JP4PRNFJE85	GGCTCCATAGCTCAGGGGTTAGAGCACTGGTC	5_tRF	55	0	0	0	0	0	0	0	0	0	0	0	0	0	0	0	0	18	14	18
tRF#20-SL735L8R	GTATAGTGGTGAGTATCCCC	i-tRF	48	0	27	16	0	0	14	0	0	0	0	0	0	0	0	0	0	0	0	0
tRF#26-38NJWHIM9ZE	CCTGGCTGGCTCGCGATGTCTGTTTT	3_U_tRF	59	0	0	0	0	0	0	0	0	0	0	0	0	0	0	21	0	0	25	0
tRF#31-OUR8309NDJ58B	GACGAGGTGGCCGAGTGGTTAAGGCGATGGA	5_tRF	0	0	14	0	12.999	0	0	0	0	0	0	0	0	0	0	0	0	0	0	78.001
tRF#22-R3HJ83RPH	GGGGTATAGCTCAGTGGTAGAG	5_tRF	15.001	0	0	0	19	0	0	0	0	0	0	0	0	0	11	14	0	0	0	45.003
tRF#23-MQ18Y3E7D8	CGTATAGTGGTTAGTACTCTGCG	i-tRF	27	0	15	19	0	0	0	0	0	0	0	0	0	0	0	0	0	16	10	17
tRF#33-YYV4V47Q2WW102	TTCTGTAGTGTAGTGGTTATCACGTTCGCCTCA	5_tRNA_halve	90	0	0	0	0	0	0	0	0	0	0	0	0	0	0	0	0	14	0	0
tRF#37-KKM1M3WD8S746D2	CCAGGCGGCCCGGGTTCGACTCCCGGTGTGGGAACCA	3_tRNA_halve	0	0	25	61	0	0	0	0	0	0	0	0	0	0	0	0	0	0	0	18
tRF#32-QNR8ZP9LON4V3	GCGTTGGTGGTTTAGTGGTAGAATTCTCGCCT	5_tRF	11	0	0	0	0	0	0	73	20	0	0	0	0	0	0	0	0	0	0	0
tRF#22-18LPMBQ43	AGTGGCGCAGCGGAAGCGTGCT	i-tRF	84.992	0	0	0	18.999	0	0	0	0	0	0	0	0	0	0	0	0	0	0	0
tRF#32-QNR8VP9NFQFYJ	GCGTTGGTGGTATAGTGGTTAGCATAGCTGCC	5_tRF	35	0	0	20	0	19	29	0	0	0	0	0	0	0	0	0	0	0	0	0
tRF#26-F91SS2P4FID	AGCTCAGTCGGTAGAGCATGAGACTC	i-tRF	10.003	0	21	23.002	0	19.999	17.997	0	0	10.997	0	0	0	0	0	0	0	0	0	0
tRF#27-V4V47Q2WW15	TAGTGTAGTGGTTATCACGTTCGCCTC	i-tRF	52	12	0	0	0	0	0	0	0	0	0	0	0	0	0	0	0	12	26	0
tRF#24-B7SJ97FUFX	AACCTGTAGCTGTCTAGCGACAGA	i-tRF	0	0	0	0	0	0	0	0	0	0	0	0	0	0	0	0	0	89	0	13
tRF#23-U45O6QJ10J	TAATGGATAAGGCATCAGCCTCC	i-tRF	64	0	11	0	0	0	11	0	0	0	0	0	0	0	0	0	0	0	16	0
tRF#22-RKIP4OI3H	GGGGGATTAGCTCAAATGGTAG	5_tRF	14	0	0	18	0	0	0	0	0	0	0	0	0	0	0	0	0	13	0	57
tRF#20-7SIR3DR2	GTTCGATTCCCCGACGGGGA	3_tRF	15	0	0	0	0	0	0	0	0	23.004	0	0	0	0	0	63	0	0	0	0
tRF#31-IKE7UMKKSWRND	ATGGGACTCTTAATCCCAGGGTCGTGGGTTC	i-tRF	69	0	0	0	0	0	0	0	0	0	0	0	0	0	0	0	0	0	32.001	0
tRF#32-31QJ3KYUYRR64	CCGCCGCGGCCCGGGTTCGATTCCCGGTCAGG	i-tRF	0	0	0	10	0	0	44	0	0	0	0	0	0	0	0	47	0	0	0	0
tRF#28-389MV47P59D9	CCTGGTGGTCTAGTGGTTAGGATTCGGC	5_tRF	0	0	35	11	0	29	12	14	0	0	0	0	0	0	0	0	0	0	0	0
tRF#28-QK11M3WE8SDV	GCGGGAGGCCCGGGTTCGATTCCCGGCC	i-tRF	0	0	0	0	0	0	0	0	33	24	34	10	0	0	0	0	0	0	0	0
tRF#22-87R8WP9IH	TCCCTGGTGGTCTAGTGGCTAG	5_tRF	21	0	0	0	0	0	0	60	0	0	0	10	0	0	0	0	0	0	0	10
tRF#23-V470VR310N	TAGTGGTGAGTATCCCCGCCTGT	i-tRF	50	0	0	20	0	0	0	0	0	0	0	0	0	0	0	0	0	17	0	14
tRF#21-SBJ25R93E	GTAAACAGGAGATCCTGGGTT	i-tRF	0	0	15	46	11	0	0	0	0	0	0	0	0	0	0	0	0	0	0	29
tRF#28-RKVP4P9L5F0Q	GGGGGTATAGCTCAGTGGTAGAGCATTT	5_tRF	56	12	0	0	0	0	0	0	0	0	0	0	0	0	0	0	0	0	0	33
tRF#22-4JRX6N38Q	CTAGCGGTTAGGATTCCTGGTT	i-tRF	77	0	0	0	0	0	0	0	0	0	0	0	0	0	0	0	0	0	24	0
tRF#30-2DNLQW4JOP18	CAAACCTGTAGCTGTCTAGCGACAGAGTGG	i-tRF	0	0	0	0	0	0	0	0	33	40	0	28	0	0	0	0	0	0	0	0
tRF#24-LM8D4N4OEQ	CGATCTCAACCTATTCTCAAACTT	5_U_tRF	0	0	46	11	19	0	14	0	0	0	0	0	0	11	0	0	0	0	0	0
tRF#31-R9J89O9NF5W8B	GGTTCCATGGTGTAATGGTTAGCACTCTGGA	5_tRF	0	0	15.001	12.999	0	0	0	0	0	0	0	0	15	11	0	34.01	0	0	0	11.998
tRF#23-9P9NH57SD3	TGTAGTGGTTATCACGTTCGCCT	i-tRF	34	0	22	0	0	0	0	0	0	0	0	0	0	0	0	0	0	14	15	15
tRF#27-9MZLB6R3LUN	TGGTCTTGTAAACCAGGGGTCGCGAGT	i-tRF	10	0	20	27	0	0	19	0	0	0	0	0	0	0	0	0	0	0	0	24
tRF#32-SMKVNMEH623KN	GTATCCCCGCCTGTCACGCGGGAGACCGGGGT	i-tRF	0	0	22	0	0	0	0	0	13	65	0	0	0	0	0	0	0	0	0	0
tRF#27-N3S3RQJVDE5	CTGGTGTAGTGGTATCATGCAAGATTC	i-tRF	16	0	0	16	0	19	0	0	0	0	0	0	0	0	0	0	0	24	25	0
tRF#20-JJYO0YVI	CAGGCTTCAAACCTGTAGCT	i-tRF	0	0	0	0	10	0	0	0	52	13	14	0	0	0	0	0	0	0	0	11
tRF#22-R29P4P9LL	GGGGATGTAGCTCAGTGGTAGA	5_tRF	25	0	13	14	0	0	0	0	0	0	0	0	12	0	0	20	0	0	16	0
tRF#21-2ZND0NMZE	CACTTCTGACACATTCGTTTT	3_U_tRF	23	0	23	13	0	0	0	0	0	0	0	0	0	0	0	0	0	0	41	0
tRF#32-R29P4P9L5HLVQ	GGGGATGTAGCTCAGTGGTAGAGCGCGCGCTT	5_tRF	84	0	0	0	0	0	0	0	0	0	0	0	0	0	0	0	0	0	16	0
tRF#27-JP4P9L5FZU3	CATAGCTCAGTGGTAGAGCATTTGACT	i-tRF	0	0	0	0	0	0	0	13	43	0	18	26	0	0	0	0	0	0	0	0
tRF#40-2VR008R9D9KUMKF6	CACGCGGGAGACCGGGGTTCAATTCCCCGACGGGGAGCCA	3_tRNA_halve	0	0	54	27	0	19	0	0	0	0	0	0	0	0	0	0	0	0	0	0
tRF#17-8871K92	TCCGGGTGCCCCCTCCA	3_tRF	0	0	24	0	21	22	0	0	11	0	0	11	0	0	0	0	0	11	0	0
tRF#31-K8HJ83ML5F82D	CCCGGATAGCTCAGTCGGTAGAGCATCAGAC	5_tRF	0	0	0	0	16.998	55.998	0	0	0	0	0	0	0	0	0	0	0	27	0	0
tRF#23-R918VBY9DV	GGTTCAGTGGTAGAATTCTCGCC	i-tRF	17	0	30	11	14	0	12	0	0	15	0	0	0	0	0	0	0	0	0	0
tRF#27-QNR8VP94FQH	GCGTTGGTGGTATAGTGGTGAGCATAG	5_tRF	0	0	17.997	0	10.003	0	0	0	0	0	0	0	33	13	0	25	0	0	0	0
tRF#19-73V6M9I3	GTGGTTATCACGTTCGCCT	i-tRF	0	0	0	0	10	0	0	0	0	0	0	0	30	13	23	0	0	11	0	12
tRF#20-WP9N1EWJ	TCTAGTGGTTAGGATTCGGC	i-tRF	24	0	24	0	0	0	0	0	0	0	0	0	0	0	0	17	0	0	0	33
tRF#36-N2ZPQR17NSRJ7KE	CTGGATTTAGGCTCCAGTCTCTTCGGGGGCGTGGGT	i-tRF	14	0	0	0	0	0	0	0	34	50	0	0	0	0	0	0	0	0	0	0
tRF#31-RPM830MMUKLY0	GGTAGCGTGGCCGAGCGGTCTAAGGCGCTGG	5_tRF	0	0	0	0	0	0	0	0	0	0	0	0	0	23	0	75	0	0	0	0
tRF#32-79M89P9NH5ISJ	GTTTCCGTGGTGTAGTGGTTATCACATTCGCC	5_tRF	50	0	0	0	0	18	0	0	0	0	0	0	0	0	0	0	0	30	0	0
tRF#23-K5YY0FYW0Q	CCCACTTCTGACACATTCGTTTT	3_U_tRF	0	11	16	28	0	0	0	0	0	0	0	0	0	0	0	0	0	0	43	0
tRF#32-ZRS3S3R68HYV3	TTTCCGTAGTGTAGTGGTCATCACGTTCGCCT	5_tRF	87	0	0	0	0	0	0	0	0	0	0	0	0	0	0	0	0	0	10	0
tRF#25-3RUJJKIWRN	CCTCCTAAGCCAGGGATTGTGGGTT	i-tRF	20	15	0	0	0	0	0	0	0	0	0	0	0	0	0	0	0	0	12	50
tRF#21-Q84V5WNNE	GCTGGCTCGCGATGTCTGTTT	3_U_tRF	29	0	16	52	0	0	0	0	0	0	0	0	0	0	0	0	0	0	0	0
tRF#25-N3R718YKIS	CTGGTGGTCTAGTGGTTAGGATTCG	5_tRF	0	0	11	21	0	0	15	0	0	0	0	0	0	35	0	0	0	0	14	0
tRF#20-93R918VB	TGGGTGGTTCAGTGGTAGAA	5_tRF	0	0	0	18	34	0	10	0	0	0	0	0	0	0	0	0	0	0	0	34
tRF#33-789LV47PJPN105	GTTGGTGGTATAGTGGTTAGCATAGCTGCCTTC	5_tRNA_halve	0	0	0	0	20	0	0	0	0	0	0	0	0	0	0	0	0	61	15	0
tRF#20-735L8RPY	GTGGTGAGTATCCCCGCCTG	i-tRF	12	10	10	16	0	0	0	0	0	0	0	12	0	11	12	0	0	0	0	13
tRF#32-Q1Q89P9L8422Q	GCGCCGCTGGTGTAGTGGTATCATGCAAGATT	5_tRF	70	0	16	10	0	0	0	0	0	0	0	0	0	0	0	0	0	0	0	0
tRF#18-1I5J107	AGGCTGAGGCAGGAGAAT	3_U_tRF	20	15	0	10	0	51	0	0	0	0	0	0	0	0	0	0	0	0	0	0
tRF#33-7RH3SJRX8HWV0Q	GTTCCATAGTGTAGCGGTTATCACGTCTGCTTT	5_tRNA_halve	10	0	0	0	0	0	0	0	0	0	0	0	0	0	0	0	0	10	76	0
tRF#22-NRUIMBDJI	CTTCCTAACTCGGAAAAGGCAT	3_U_tRF	0	0	83	0	0	0	13	0	0	0	0	0	0	0	0	0	0	0	0	0
tRF#30-JMRPFQRDWXHR	CAGTCGGTAGAGCATGGGACTCTTAATCCC	i-tRF	0	0	18	36.999	0	0	0	0	0	0	0	0	0	0	0	0	0	20.001	0	20.001
tRF#29-79MP9PMNH5F5	GTTTCCGTAGTGTAGCGGTTATCACATTC	5_tRF	95	0	0	0	0	0	0	0	0	0	0	0	0	0	0	0	0	0	0	0
tRF#26-XMSL73VL4YD	TGATCGTATAGTGGTTAGTACTCTGC	5_tRF	0	0	15	28	12	18	0	0	0	0	0	12	0	0	0	0	0	0	10	0
tRF#40-1KVUY9QZR4L2RRM3	AGGGGTATGATTCTCGCTTTGGGTGCGAGAGGTCCCGGGT	i-tRF	0	0	12	35	0	12	0	0	0	21	0	0	0	0	0	0	0	0	0	15
tRF#21-V98BNXD80	TATTCTCAAACTTTAAATGGG	5_U_tRF	0	0	0	25	22	0	0	0	0	0	0	0	16	10	12	0	0	0	10	0
tRF#20-S9Y8RH93	GTCTCTTCGGGGGCGTGGGT	i-tRF	0	0	0	0	0	0	0	35	0	59.997	0	0	0	0	0	0	0	0	0	0
tRF#23-1E6SF8WOD9	AGGATGGCCGAGCGGTCTAAGGC	5_tRF	0	0	11.997	10.998	0	0	0	0	0	0	0	0	0	0	0	0	0	25.002	0	46.998
tRF#26-32VIJMRPFQD	CCGGATAGCTCAGTCGGTAGAGCATC	5_tRF	0	0	46.002	0	16	0	0	0	0	0	0	0	0	0	0	0	0	0	0	31.998
tRF#45-PNR8YP9LON4VN1EH6K	GCATTGGTGGTTCAGTGGTAGAATTCTCGCCTGCCACGCGGGAGG	5_tRF	0	0	0	0	0	0	0	0	0	73.003	0	0	0	0	0	20	0	0	0	0
tRF#27-9NJ4S2I7L7M	TGGTTCAGTGGTAGAATTCTCGCCTGC	i-tRF	0	0	48	31	0	0	0	0	0	0	0	0	0	0	0	0	0	0	0	14
tRF#35-79MP9P9NHQ7S36	GTTTCCGTAGTGTAGTGGTTATCATGTTCGCCTCA	5_tRNA_halve	78	0	0	0	0	0	0	0	0	0	0	0	0	0	0	0	0	15	0	0
tRF#23-6YQSL4WW0Q	GGCTGGCTCGCGATGTCTGTTTT	3_U_tRF	0	0	18	0	0	35	0	0	0	0	0	0	0	0	0	0	0	0	40	0
tRF#27-R8VP9NFQFYJ	GGTGGTATAGTGGTTAGCATAGCTGCC	i-tRF	0	0	0	22	12	0	18	0	0	0	0	0	0	15	0	15	0	11	0	0
tRF#24-7EMQ18Y3E5	GTGATCGTATAGTGGTTAGTACTC	5_tRF	23.004	0	0	0	0	0	9.999	0	9.999	15.003	0	0	0	0	0	0	0	11.997	9.999	12.996
tRF#20-OUR8309N	GACGAGGTGGCCGAGTGGTT	5_tRF	49	0	0	12.999	0	19.999	10.003	0	0	0	0	0	0	0	0	0	0	0	0	0
tRF#22-X6L85J3KQ	TGCCACGCGGGAGGCCCGGGTT	i-tRF	0	0	38	0	0	0	10	0	0	0	0	0	0	0	0	0	0	10	23	11
tRF#21-VIJNRX5HE	TAGCTCAGTTGGTTAGAGCGT	i-tRF	0	0	0	0	0	0	0	15	0	52	0	25	0	0	0	0	0	0	0	0
tRF#26-QNR8VP9LFQB	GCGTTGGTGGTATAGTGGTAAGCATA	5_tRF	22	0	20	0	15	0	0	0	0	0	0	0	20	15	0	0	0	0	0	0
tRF#30-ZRS3S3RX8HYV	TTTCCGTAGTGTAGTGGTTATCACGTTCGC	5_tRF	17	0	38	0	0	0	15	0	0	0	0	0	0	0	0	0	0	0	0	21
tRF#31-R918VBY9PYKHD	GGTTCAGTGGTAGAATTCTCGCCTGCCACGC	i-tRF	12	0	26	11	0	0	18	0	0	0	0	0	0	0	0	0	0	0	0	24
tRF#28-789LV47PJPDP	GTTGGTGGTATAGTGGTTAGCATAGCTG	5_tRF	0	0	16	15	27	0	0	0	0	0	0	0	0	0	0	0	0	13	0	20
tRF#39-QNR8VP9NFQFY39FS	GCGTTGGTGGTATAGTGGTTAGCATAGCTGCCTTCCAAG	5_tRNA_halve	0	0	11	0	0	0	49	0	0	0	0	0	0	0	0	31	0	0	0	0
tRF#32-RPM8309MUKLYL	GGTAGCGTGGCCGAGTGGTCTAAGGCGCTGGA	5_tRF	38	0	21	0	0	0	11	0	0	0	0	0	0	0	0	0	0	0	0	21
tRF#50-RPM8309MUKLY5Z1IK3JZ	GGTAGCGTGGCCGAGTGGTCTAAGGCGCTGGATTTAGGCTCCAGTCATTT	5_tRF	0	0	0	0	0	0	0	15	0	46	0	0	30	0	0	0	0	0	0	0
tRF#22-W086W8RV2	TCGAGTCCCATCTGGGGTGCCA	3_tRF	0	0	77	13	0	0	0	0	0	0	0	0	0	0	0	0	0	0	0	0
tRF#28-1IK3JZL4Q4DZ	AGGCTCCAGTCATTTCGATGGCGTGGGT	i-tRF	0	0	0	55	13	0	11	0	0	0	0	0	0	0	0	0	0	11	0	0
tRF#23-RLVIJ4S2D8	GGGTATAGCTCAGTGGTAGAGCG	5_tRF	0	0	17	15	0	26	12	0	0	0	0	0	0	0	0	0	0	0	0	20
tRF#31-L85DMKYOYRLH0	CGCGGGAGACCGGGGTTCAATTCCCCGACGG	i-tRF	0	0	0	0	0	0	0	24	0	66	0	0	0	0	0	0	0	0	0	0
tRF#19-KPW7EO07	CCCAGTCTCTACTAAAAAT	5_U_tRF	67	10	0	0	0	13	0	0	0	0	0	0	0	0	0	0	0	0	0	0
tRF#32-W60XY9BIYB9JF	TCTCAACCTATTCTCAAACTTTAAATGGGCAA	5_U_tRF	0	0	10	19	0	61	0	0	0	0	0	0	0	0	0	0	0	0	0	0
tRF#26-J4S2I7L7P50	CAGTGGTAGAATTCTCGCCTGCCACG	i-tRF	0	0	17	13	23	0	13	0	0	0	0	0	0	0	0	0	0	0	0	23
tRF#20-R8YP9LON	GGTGGTTCAGTGGTAGAATT	i-tRF	0	0	0	0	69	0	0	0	0	0	0	0	0	0	10	0	0	0	10	0
tRF#21-897PVP94B	TCCTCGTTAGTATAGTGGTGA	5_tRF	89	0	0	0	0	0	0	0	0	0	0	0	0	0	0	0	0	0	0	0
tRF#20-7F6Z2DNL	GTGCAGGCTTCAAACCTGTA	i-tRF	16	28	0	10	11	0	0	0	0	0	0	0	0	0	0	0	0	24	0	0
tRF#24-08R959KU1Y	ACCGGGGTTCGATTCCCCGACGGG	i-tRF	59	0	16	0	0	0	13	0	0	0	0	0	0	0	0	0	0	0	0	0
tRF#21-P4L2RPM2E	GCATGCGAGAGGTAGCGGGAT	i-tRF	0	0	0	26	0	0	0	0	0	50	0	0	0	0	0	0	0	0	0	12
tRF#28-Q1Q89P9L84DF	GCGCCGCTGGTGTAGTGGTATCATGCAA	5_tRF	20	0	19	15	0	0	22	0	0	0	0	0	0	0	0	0	0	12	0	0
tRF#29-Z3R918VBY9I3	TTGGTGGTTCAGTGGTAGAATTCTCGCCT	5_tRF	17	0	14	17	0	0	0	0	0	0	0	0	0	0	0	0	0	12	0	27
tRF#23-VIJMRPFQDY	TAGCTCAGTCGGTAGAGCATGGG	i-tRF	0	0	26	27	11	0	0	0	0	0	0	0	0	0	0	0	0	0	0	23
tRF#29-I0E7UM8KSWIZ	ATGAGACTCTTAATCTCAGGGTCGTGGGT	i-tRF	0	0	25	33	0	0	0	0	0	0	0	0	0	0	0	0	0	10	0	19
tRF#27-73S3RX84YV3	GTGGTGTAGTGGTTATCATGTTCGCCT	i-tRF	75	0	0	0	0	0	0	0	0	0	0	0	0	0	0	0	0	12	0	0
tRF#20-QNR8VP94	GCGTTGGTGGTATAGTGGTG	5_tRF	0	0	21	0	0	0	0	0	0	0	0	0	27	10	0	18	0	0	0	10.997
tRF#35-IEWSNYRV50SRRN	ATGATTCTCGCTTTGGGTGCGAGAGGTCCCGGGTT	i-tRF	13.998	0	15	41	0	0	0	0	0	0	0	0	0	0	0	0	0	0	0	16.998
tRF#29-PSQP4PW3FJFL	GCCCGGCTAGCTCAGTCGGTAGAGCATGA	5_tRF	0	0	0	0	0	0	0	34.002	0	36	16.002	0	0	0	0	0	0	0	0	0
tRF#23-9NH57S36D1	TGGTTATCACGTTCGCCTCACAC	i-tRF	0	0	29	13	10	0	24	0	0	0	0	0	0	0	0	0	0	0	0	10
tRF#20-Y9PYKHM2	TTCTCGCCTGCCACGCGGGA	i-tRF	0	0	11	11	10	13	0	0	23	0	0	0	0	0	0	0	0	18	0	0
tRF#21-RQ18YJHJE	GGTATAGTGGTTAGCATAGCT	i-tRF	26	0	0	19	14	0	11	0	0	0	0	0	0	0	0	0	0	0	16	0
tRF#23-87R8WP9IY	TCCCTGGTGGTCTAGTGGCTAGG	5_tRF	0	0	19	13	0	0	0	0	20	0	0	0	13	0	11	10	0	0	0	0
tRF#31-70VR3196L85DD	GTGAGTATCCCCGCCTGTCACGCGGGAGACC	i-tRF	0	0	72	0	0	0	0	0	0	0	0	0	0	0	0	0	0	0	0	14
tRF#22-R71KVUY9M	GGTCTAGGGGTATGATTCTCGC	i-tRF	0	0	24	16	20	0	0	0	0	0	0	0	0	0	0	0	0	0	13	13
tRF#24-59KNNVORIZ	GATTCCCATTCTTGCGACCCGGGT	i-tRF	0	0	41	0	0	20	14	0	0	0	0	0	0	0	0	0	0	0	0	11
tRF#50-FP18LPMBQ4NKKQBRFKWE	AGCAGAGTGGCGCAGCGGAAGCGTGCTGGGCCCATAACCCAGAGGTCGAT	5_tRF	0	0	0	27	0	0	10.998	0	0	47.007	0	0	0	0	0	0	0	0	0	0
tRF#29-1IK34ZMKQ42E	AGGCTCCAGTCTCTTCGGGGGCGTGGGTT	i-tRF	10.997	0	0	0	0	0	0	24.003	0	0	0	0	0	22	16	12	0	0	0	0
tRF#17-6Y1F62I	GGCTGAGGCAGGAGAAT	3_U_tRF	49	11	0	0	0	0	0	0	0	0	0	0	0	0	0	0	0	13	0	12
tRF#30-79MP9PMNH5IS	GTTTCCGTAGTGTAGCGGTTATCACATTCG	5_tRF	19	0	34	0	0	0	0	0	0	0	0	0	18	0	0	14	0	0	0	0
tRF#33-Y0QR17NSRJ7K0Q	TTAAGGCTCCAGTCTCTTCGGGGGCGTGGGTTT	i-tRF	10	0	0	10	0	0	13	0	0	0	0	0	0	17	20	15	0	0	0	0
tRF#28-FP18LPMBQ4DP	AGCAGAGTGGCGCAGCGGAAGCGTGCTG	5_tRF	46.998	0	0	0	0	0	0	0	0	0	0	0	0	11	0	27	0	0	0	0
tRF#21-QNJ3LPWRD	GCGTTCAGGTCGCAGTCTCCC	i-tRF	84.996	0	0	0	0	0	0	0	0	0	0	0	0	0	0	0	0	0	0	0
tRF#30-J09HJHOJ7IR1	CAGAGTGGCGCAGCGGAAGCGTGCTGGGCC	5_tRF	0	0	0	0	0	0	0	0	0	33.003	0	15.003	0	0	0	0	0	12.996	23.004	0
tRF#38-MBQ4NKKQBRFKWEDX	CGGAAGCGTGCTGGGCCCATAACCCAGAGGTCGATGGA	i-tRF	10.998	0	16.002	24.003	0	0	0	0	0	0	0	0	0	0	0	0	0	0	0	33.003
tRF#20-17NSRJ7K	AGTCTCTTCGGGGGCGTGGG	i-tRF	0	0	0	0	0	0	0	0	0	84.002	0	0	0	0	0	0	0	0	0	0
tRF#29-18YKISQI451V	AGTGGTTAGGATTCGGCGCTCTCACCGCC	i-tRF	0	0	35	0	15	0	0	0	0	0	0	0	0	0	0	0	0	14	0	20
tRF#36-79MP9P9MH57S3OD	GTTTCCGTAGTGTAGTGGTCATCACGTTCGCCTAAC	5_tRNA_halve	40	0	0	0	0	0	0	0	0	0	0	0	0	0	0	0	0	21	23	0
tRF#24-XSXMSL732Z	TGCCGTGATCGTATAGTGGTTAGT	5_tRF	0	0	32	0	16	0	15	0	0	0	0	0	0	0	0	0	0	21	0	0
tRF#21-SXR3IEWSD	GTCTAGGGGTATGATTCTCGC	i-tRF	0	0	21	16	24	0	0	0	0	0	0	0	0	0	0	0	0	0	0	23
tRF#42-YDLBRY73W0K5KKOV2	TTAACCGAAAGGTTGGTGGTTCGAGCCCACCCAGGGACGCCA	3_tRNA_halve	0	0	12.996	19.998	0	0	30.996	0	0	0	0	0	0	0	0	20	0	0	0	0
tRF#26-QD3KYUYRRH0	GCGACCCGGGTTCGATTCCCGGGCGG	i-tRF	0	0	0	0	0	0	0	0	57	0	15	11	0	0	0	0	0	0	0	0
tRF#25-0P58309NDJ	ACCAGGATGGCCGAGTGGTTAAGGC	5_tRF	22	0	37	0	0	0	12	0	0	0	0	0	0	0	0	12	0	0	0	0
tRF#50-PSQP4PW3FJIKE7UMKKSW	GCCCGGCTAGCTCAGTCGGTAGAGCATGGGACTCTTAATCCCAGGGTCGT	5_tRF	0	0	0	13	0	0	19	0	0	24	0	0	15	0	0	12	0	0	0	0
tRF#49-Z3R918VBY9PYKHM26RIZ	TTGGTGGTTCAGTGGTAGAATTCTCGCCTGCCACGCGGGAGGCCCGGGT	5_tRF	0	0	0	38.997	0	12.999	10.003	0	0	0	0	0	0	0	0	21	0	0	0	0
tRF#20-6XQ6S8V0	GGCTAGCTCAGTCGGTAGAG	5_tRF	0	0	14.004	0	12.996	0	0	0	0	0	0	0	14	12	0	0	0	18	0	11.997
tRF#19-HJ83MLH9	ATAGCTCAGTCGGTAGAGC	i-tRF	0	0	0	0	0	0	0	33.005	0	38.997	0	10.003	0	0	0	0	0	0	0	0
tRF#19-VIJMRXH9	TAGCTCAGTCGGTTAGAGC	i-tRF	0	0	0	0	0	0	0	28	41	0	0	0	0	0	0	0	0	0	13	0
tRF#25-R4VIJ4S2QF	GGGTGTAGCTCAG-TGGTAGAGCGCA	5_tRF	0	0	0	0	0	0	0	66	0	0	0	15.999	0	0	0	0	0	0	0	0
tRF#22-YFLPD338N	TTACACGCAGAAGGTCCTGGGT	i-tRF	0	0	24	14	43	0	0	0	0	0	0	0	0	0	0	0	0	0	0	0
tRF#26-W3FJIKE7UMD	TCGGTAGAGCATGGGACTCTTAATCC	i-tRF	0	0	45	12	0	0	12.999	0	0	0	0	0	0	0	0	0	0	0	0	11.001
tRF#33-69M8LO9EFVI8W	GGCTCCGTGGCGCAATGGATAGCGCATTGGACT	5_tRF	29	0	0	0	0	0	0	0	0	0	0	0	0	0	0	0	0	0	40	12
tRF#21-69I19O860	GGCTCATGCCTGTAATCCCAG	3_U_tRF	33	14	0	0	11	0	0	0	0	0	0	0	0	0	0	10	0	0	13	0
tRF#22-RNLNKSEKL	GGGTTCGATTCCCCGACGGGGA	3_tRF	0	0	0	0	0	0	0	0	21	0	12	0	0	0	0	48	0	0	0	0
tRF#27-N3WE884U1D2	CTGGTTCGATTCCGGCTCGAAGGACCA	3_tRF	0	0	49.998	0	0	0	21	0	0	0	0	0	0	0	0	0	0	0	0	10.002
tRF#21-73FJQ4NSD	GTGGTAGAGCGCGTGCTTCGC	i-tRF	20	0	0	0	0	0	0	0	0	0	0	0	11	39	10	0	0	0	0	0
tRF#40-548KIJL3R7DJPPE6	GAGTGTCAGGATGGCCGAGTGGTCTAAGGCGCCAGACTCA	5_U_tRNA_halve	80	0	0	0	0	0	0	0	0	0	0	0	0	0	0	0	0	0	0	0
tRF#18-LP76DR0M	CGCAGGTTCAAATCCTGC	i-tRF	0	0	0	0	0	0	0	36	0	33	0	11	0	0	0	0	0	0	0	0
tRF#22-PSQP4PW3H	GCCCGGCTAGCTCAGTCGGTAG	5_tRF	0	0	14.004	9.999	19.998	0	0	0	0	0	0	12.996	0	0	0	0	0	12.996	0	9.999
tRF#25-7343RX6NMH	GTGGTCTAGTGGTTAGGATTCGGCG	i-tRF	0	0	0	0	15	25	0	0	0	0	0	0	0	0	0	0	0	27	0	12
tRF#25-F1R3WE8RO8	AGACCGGGGTTCGATTCCCCGACGG	i-tRF	41	12	0	0	0	0	0	0	0	0	0	0	0	0	0	0	0	0	14	12
tRF#27-7PVP941QKSJ	GTTAGTATAGTGGTGAGTATCCCCGCC	i-tRF	0	0	0	0	11	0	0	0	0	0	0	0	12	56	0	0	0	0	0	0
tRF#24-9MVKS4I71W	TGGTCTAGGGGTATGATTCTCGCT	i-tRF	0	0	52	0	0	0	0	0	0	0	0	0	0	0	0	0	0	0	0	27
tRF#20-WPRLXN48	TCTAGGGGTATGATTCTCGG	i-tRF	0	0	32	0	10	0	0	0	0	0	0	0	0	0	0	0	0	14	0	23
tRF#20-NKPYNRSZ	CTGGGGCCTGCTTCCGTCTT	3_U_tRF	0	11	0	15	11	42	0	0	0	0	0	0	0	0	0	0	0	0	0	0
tRF#23-NH99OMEMDY	CTGCGTGTTCGAATCACGTCGGG	i-tRF	0	0	0	0	0	0	0	0	0	0	44	35	0	0	0	0	0	0	0	0
tRF#29-7P4PZ3V0M8JW	GTTAGCTCAGTTGGTTAGAGCGTGGTGCT	i-tRF	78.003	0	0	0	0	0	0	0	0	0	0	0	0	0	0	0	0	0	0	0
tRF#31-947673FEWS3VD	TGGTGGTTCAGTGGTAGAATTCTCGCCTGCC	5_tRNA_halve	0	0	20	31	13	0	0	0	0	0	0	0	0	0	0	0	0	0	0	14
tRF#25-7383RPD9W1	GTGGTTCAGTGGTAGAATTCTCGCC	i-tRF	0	0	0	0	0	0	0	44	23	0	0	0	0	0	0	0	0	11	0	0
tRF#23-WLV47PU90M	TCGTATAGTGGTTAGTACTCTGC	i-tRF	0	0	24	36	0	0	18	0	0	0	0	0	0	0	0	0	0	0	0	0
tRF#19-RR50SRIZ	GGTCCGAGAGGTCCCGGGT	i-tRF	0	0	21	15	15	0	0	0	0	0	0	0	0	0	0	0	0	0	0	27
tRF#26-7383RPD9W1E	GTGGTTCAGTGGTAGAATTCTCGCCT	i-tRF	57	0	0	0	0	0	0	0	0	0	0	0	0	0	0	0	0	20	0	0
tRF#31-3SY3H3RUSMKVD	CCTCGTTAGTATAGTGGTGAGTATCCCCGCC	5_tRF	23	0	10	0	0	0	0	0	0	17	0	0	0	17	0	0	0	10	0	0
tRF#20-JHOJ7IR1	CAGCGGAAGCGTGCTGGGCC	i-tRF	53	0	0	0	0	0	0	0	0	0	0	0	0	0	0	0	0	24	0	0
tRF#23-R9D927Y8D8	GGTTCAATTCCACCTTTCGGGCG	3_tRF	10	0	0	0	0	0	0	0	29	22	0	16	0	0	0	0	0	0	0	0
tRF#26-RKVP4P9L5FE	GGGGGTATAGCTCAGTGGTAGAGCAT	5_tRF	0	10	0	0	15	40	0	0	0	0	0	0	0	0	0	0	0	0	0	12
tRF#33-HM21YP4LR45D0Q	ATATCCAACCTTCAGCTATAGGGTGGAGACTTT	3_U_tRF	0	0	65	0	0	0	12	0	0	0	0	0	0	0	0	0	0	0	0	0
tRF#30-9MV47P596VW6	TGGTCTAGTGGTTAGGATTCGGCGCTCTCA	i-tRF	54	0	13	10	0	0	0	0	0	0	0	0	0	0	0	0	0	0	0	0
tRF#23-M1M3WE8S0D	CGGCCCGGGTTCGATTCCCGGTC	i-tRF	14	0	12	14	14	0	0	0	0	0	0	0	0	0	0	0	0	0	23	0
tRF#34-KSPM8OHP3D7YHQ	CCCCGGCATCTCCAAATCAGCCGACGTTTGCTTT	3_U_tRF	0	0	0	35	0	31	0	0	0	0	0	0	0	0	0	0	0	0	11	0
tRF#39-73V2Y8L981PV6RIZ	GTGGTTAGGATTCGGCGCTCTCACCGCCGCGGCCCGGGT	i-tRF	10	0	10	0	0	24	0	0	0	0	0	0	0	0	0	0	0	14	0	19
tRF#26-R8WP9N1EWJ0	GGTGGTCTAGTGGTTAGGATTCGGCG	i-tRF	20	0	0	13	0	0	0	0	0	0	0	0	0	0	0	0	0	14	13	16
tRF#23-94SX73V205	TGGTGGTCTAGTGGTTAGGATTC	5_tRF	0	0	21	0	24	0	0	0	0	0	0	0	0	0	0	0	0	0	14	17
tRF#23-S3RX8HYVD5	GTAGTGGTTATCACGTTCGCCTC	i-tRF	54	0	0	0	0	0	0	0	0	0	0	0	0	0	0	0	0	0	22	0
tRF#22-18VBY9PYJ	AGTGGTAGAATTCTCGCCTGCC	i-tRF	11	0	19	15	0	0	0	0	0	0	0	0	0	0	0	0	0	10	0	21
tRF#22-YP9LON4V3	TTCAGTGGTAGAATTCTCGCCT	i-tRF	50	0	0	0	0	0	0	0	0	0	0	0	0	0	0	0	0	13	13	0
tRF#36-70VR3196L85DMKE	GTGAGTATCCCCGCCTGTCACGCGGGAGACCGGGGT	i-tRF	0	0	20	17	0	0	0	0	0	16	0	10	0	0	0	0	0	0	0	13
tRF#20-1MQKYU8R	AGGTCGCGGGTTCGATCCCC	i-tRF	0	0	0	0	0	0	0	18	23	0	0	0	0	0	0	0	0	35	0	0
tRF#33-623K76IR3DR2DV	GGAGACCGGGGTTCAATTCCCCGACGGGGAGCC	3_tRF	41	0	0	35	0	0	0	0	0	0	0	0	0	0	0	0	0	0	0	0
tRF#24-86N7O5ISKQ	TCCCACTTCTGACACATTCGTTTT	3_U_tRF	0	0	12	34	0	0	10	0	0	0	0	0	0	0	0	0	0	0	20	0
tRF#20-548KIJL3	GAGTGTCAGGATGGCCGAGT	5_U_tRF	76	0	0	0	0	0	0	0	0	0	0	0	0	0	0	0	0	0	0	0
tRF#22-WP9N1EWJM	TCTAGTGGTTAGGATTCGGCGC	i-tRF	40	15	0	20	0	0	0	0	0	0	0	0	0	0	0	0	0	0	0	0
tRF#20-8W1W18YM	TCCGTAGTGTAGTGGTTATC	5_tRF	19	0	17	0	0	0	0	0	0	0	0	0	0	13	0	0	0	11	15	0
tRF#22-Q1Q89P9L5	GCGCCGCTGGTGTAGTGGTATC	5_tRF	22	0	25	15	13	0	0	0	0	0	0	0	0	0	0	0	0	0	0	0
tRF#34-PS5U8918W8RVE9	GCCCGGATGATCCTCAGTGGTCTGGGGTGCAGGC	5_tRF	29	0	0	0	0	0	0	0	13	0	23	10	0	0	0	0	0	0	0	0
tRF#33-PJ58309NDJ78W	GCAGCGATGGCCGAGTGGTTAAGGCGTTGGACT	5_tRF	56	0	0	0	0	0	0	0	0	0	0	0	0	0	0	0	0	0	19	0
tRF#23-4E6L1F8JD5	CTAATGGATAAGGCATCAGCCTC	i-tRF	25	0	0	0	0	29	0	0	0	0	0	0	0	0	0	0	0	11	0	10
tRF#25-PUBUW60XY9	GCCGAAACGATCTCAACCTATTCTC	5_U_tRF	0	0	0	36	14	0	25	0	0	0	0	0	0	0	0	0	0	0	0	0
tRF#32-7P596VW631QJJ	GTTAGGATTCGGCGCTCTCACCGCCGCGGCCC	i-tRF	0	0	32	31	0	0	0	0	0	0	0	0	0	0	0	0	0	0	0	11
tRF#30-WN1Q18X3HRL7	TCGTTAGTATAGTGGTGAGTATCCCCGCCT	5_tRF	47	0	0	0	0	0	0	0	0	0	0	0	0	0	0	0	0	0	27	0
tRF#29-944EBV2KWH2E	TGGTGCTAATAACGCCAAGGTCGCGGGTT	i-tRF	0	0	27	0	0	47	0	0	0	0	0	0	0	0	0	0	0	0	0	0
tRF#36-ZN8W1W18YMENL7B	TTGTTTCCGTAGTGTAGTGGTTATCACGTTCGCCTA	5_U_tRNA_halve	62	0	0	0	0	0	0	0	0	0	0	0	0	0	0	0	0	12	0	0
tRF#22-6LQ6S8V02	GGATAGCTCAGTCGGTAGAGCA	5_tRF	0	0	18.998	0	10.003	44.002	0	0	0	0	0	0	0	0	0	0	0	0	0	0
tRF#20-5933JKB6	GATTCCCGGTCAGGGAACCA	3_tRF	0	0	56	0	0	0	17	0	0	0	0	0	0	0	0	0	0	0	0	0
tRF#30-R918VBY9PYKH	GGTTCAGTGGTAGAATTCTCGCCTGCCACG	i-tRF	0	0	16	0	28	0	0	0	0	0	0	0	0	0	15	0	0	0	0	14
tRF#24-87R8WP9IEX	TCCCTGGTGGTCTAGTGGCTAGGA	5_tRF	59	0	0	0	0	0	0	0	0	0	0	0	0	0	0	0	0	0	14	0
tRF#20-D8H0PMF7	AATGGATAAGGCATCAGCCT	i-tRF	14	0	0	10	18	0	0	0	0	0	0	0	0	0	0	0	0	0	21	10
tRF#22-8RQFR9OM3	TCCCCGCGCAGGTTCGAATCCT	i-tRF	0	0	0	0	0	0	0	0	24	0	20	29	0	0	0	0	0	0	0	0
tRF#27-F36VF8DHXY4	AGAGTGGCGCAGCGGAAGCGTGCTGGG	5_tRF	41.004	0	10.998	0	0	0	0	0	0	0	0	0	0	0	0	0	0	0	20.997	0
tRF#21-LB3KMB01B	CGAAACCGGGCGGAAACACCA	3_tRF	0	0	28	16	12	0	0	0	0	0	0	0	0	0	0	0	0	16.995	0	0
tRF#26-673OPP6N7KE	GGCCTCCTAAGCCAGGGATTGTGGGT	i-tRF	0	0	16	22	23	0	0	0	0	0	0	0	0	0	0	0	0	0	0	11
tRF#23-8XF6RE980E	TCCTAAGCCAGGGATTGTGGGTT	i-tRF	14	0	0	0	0	0	0	0	0	0	0	0	0	0	0	0	0	13	0	45
tRF#21-RW18V6XO0	GGTGTAGTGGTATCATGCAAG	i-tRF	20	0	0	0	0	0	12	0	0	20	0	0	0	0	0	0	0	20	0	0
tRF#27-SL73VL8RPY5	GTATAGTGGTTAGTATCCCCGCCTGTC	i-tRF	32	0	0	18	0	0	0	0	0	0	0	0	0	0	0	0	0	22	0	0
tRF#21-W7WK6WRNE	TCTCTTCGGGGGCGTGGGTTT	i-tRF	16	0	0	0	0	0	0	0	14	42	0	0	0	0	0	0	0	0	0	0
tRF#23-MUWLV47P01	CGTGATCGTATAGTGGTTAGTAC	5_tRF	11.997	0	10.998	0	0	10.998	0	0	14.004	0	0	0	0	0	0	0	0	24.003	0	0
tRF#30-R9JP9PMNH5SY	GGTTCCATAGTGTAGCGGTTATCACGTCTG	5_tRF	14	0	27	21	0	0	0	0	0	0	0	0	10	0	0	0	0	0	0	0
tRF#23-392J1Y0SDZ	CCTTCCAAGCAGTTGACCCGGGT	i-tRF	0	0	27	0	15	18	11	0	0	0	0	0	0	0	0	0	0	0	0	0
tRF#20-3K7SIR3D	CCGGGGTTCGATTCCCCGAC	i-tRF	48	10	0	0	0	0	0	0	0	0	0	0	0	13	0	0	0	0	0	0
tRF#23-18X3HRL70D	AGTGGTGAGTATCCCCGCCTGTC	i-tRF	15	0	0	0	0	0	0	0	0	0	0	0	0	0	0	0	0	45	11	0
tRF#24-9MVKS4I71Z	TGGTCTAGGGGTATGATTCTCGGT	i-tRF	0	0	19	12	25	0	0	0	0	0	0	0	0	0	0	0	0	0	0	15
tRF#24-VH7P59N3K5	TAGCGGTTAGGATTCCTGGTTTTC	i-tRF	57	0	0	0	0	0	0	0	0	0	0	0	0	0	0	0	0	14	0	0
tRF#24-9MVH7P59H4	TGGTCTAGCGGTTAGGATTCCTGG	i-tRF	0	0	28	12	0	0	0	0	0	0	0	0	16	15	0	0	0	0	0	0
tRF#25-R0SJ7JL3R7	GGGAGGTAGCGTGGCCGAGTGGTCT	5_U_tRF	35	13	0	0	0	0	0	0	0	0	0	0	0	0	0	0	0	0	13	10
tRF#35-79MP9P9NIQ7S36	GTTTCCGTAGTGTAGTGGTTATTATGTTCGCCTCA	5_tRNA_halve	60	0	0	0	0	0	0	0	0	0	0	0	0	0	0	0	0	11	0	0
tRF#20-9VWVEH93	TGTGCTCTGCACGCGTGGGT	i-tRF	0	0	0	0	0	0	0	0	0	0	0	0	0	0	0	0	0	0	0	71
tRF#21-V470VR31E	TAGTGGTGAGTATCCCCGCCT	i-tRF	47	0	0	0	0	0	0	0	0	0	0	0	0	0	0	0	0	0	14	10
tRF#21-8RQFR9OMD	TCCCCGCGCAGGTTCGAATCC	i-tRF	0	0	0	0	0	0	0	0	18	0	20	33	0	0	0	0	0	0	0	0
tRF#27-V47P596VW6J	TAGTGGTTAGGATTCGGCGCTCTCACC	i-tRF	0	11	21	13	0	0	12	0	0	0	0	0	0	0	0	0	0	0	0	13
tRF#29-MY73H3RXPLIP	CGTTGGTGGTATAGTGGTTAGCATAGCTG	5_tRF	11	0	25	0	21	0	0	0	0	0	0	0	0	0	0	0	0	0	0	13
tRF#26-789LV47PJPD	GTTGGTGGTATAGTGGTTAGCATAGC	5_tRF	0	0	0	47	0	0	11	0	0	0	0	0	0	0	0	0	0	0	0	12
tRF#29-3L7L73J6M9I3	CCGTAGTGTAGTGGTCATCACGTTCGCCT	5_tRF	20	0	0	0	0	0	0	0	0	0	0	0	0	0	0	0	0	22	28	0
tRF#41-UJJKIWRNL3KQNK71B	TAAGCCAGGGATTGTGGGTTCGAGTCCCATCTGGGGTGCCA	3_tRNA_halve	0	0	13	57	0	0	0	0	0	0	0	0	0	0	0	0	0	0	0	0
tRF#31-L85DMKYUYRLH0	CGCGGGAGACCGGGGTTCGATTCCCCGACGG	i-tRF	0	0	0	0	0	0	0	0	0	0	0	0	0	0	10	60	0	0	0	0
tRF#25-6YYDLBRY73	GGCTGTTAACCGAAAGGTTGGTGGT	i-tRF	0	0	13	0	0	0	13	0	23	0	0	0	0	0	0	0	0	0	0	21
tRF#25-NJ9ILU977Z	CTGGCTGGCTCGCGATGTCTGTTTT	3_U_tRF	12	0	10	0	0	29	0	0	0	0	0	0	0	19	0	0	0	0	0	0
tRF#20-OMJHHS19	GAATCCAGCGATCCGAGTTC	i-tRF	34	0	0	0	0	0	0	0	0	0	0	0	0	0	0	0	0	36	0	0
tRF#38-79MP9P9MH57S3OD1	GTTTCCGTAGTGTAGTGGTCATCACGTTCGCCTAACAC	5_tRNA_halve	0	0	21	34	0	0	15	0	0	0	0	0	0	0	0	0	0	0	0	0
tRF#20-8SOUPRWZ	TCCCGGACGAGCCCCTCTTT	3_U_tRF	11	0	0	21	0	10	0	0	0	0	0	0	0	11	0	0	0	0	17	0
tRF#25-VP9N15WV7W	TATAGTGGTTAGTACTCTGCGTTGT	i-tRF	20.997	0	0	9.999	0	28.998	0	0	0	0	0	0	0	0	0	0	0	0	0	9.999
tRF#21-43RX6NMHD	CTAGTGGTTAGGATTCGGCGC	i-tRF	54	15	0	0	0	0	0	0	0	0	0	0	0	0	0	0	0	0	0	0
tRF#22-282K63ZNQ	CACGGCAAGGGGAGTTTGTTTT	3_U_tRF	0	13	13	20	0	0	0	0	0	0	0	0	0	0	0	0	0	0	23	0
tRF#24-7S1RJ7R3I2	GTTCGAGTCCCATCTGGGGTGCCA	3_tRF	0	0	32	14	0	0	0	0	0	0	0	0	0	0	0	0	0	11	0	12
tRF#29-32VIJMRPFQFX	CCGGATAGCTCAGTCGGTAGAGCATCAGA	5_tRF	0	0	40.998	13.002	0	0	0	0	0	0	0	0	0	0	0	0	0	0	0	15
tRF#26-HJ839L5F82D	ATAGCTCAGTTGGTAGAGCATCAGAC	i-tRF	0	0	0	0	0	0	0	20	0	49	0	0	0	0	0	0	0	0	0	0
tRF#27-J188FYRE98N	CAGCCTCCGGAGCTGGGGATTGTGGGT	i-tRF	13	0	14	0	0	42	0	0	0	0	0	0	0	0	0	0	0	0	0	0
tRF#22-SEKP2Z924	GTAATCCCAGCACTTTGGGAGG	3_U_tRF	15	0	12	0	0	42	0	0	0	0	0	0	0	0	0	0	0	0	0	0
tRF#42-JMRPFQRDWXHR13M8N	CAGTCGGTAGAGCATGGGACTCTTAATCCCAGGGTCGTGGGT	i-tRF	0	0	15	54	0	0	0	0	0	0	0	0	0	0	0	0	0	0	0	0
tRF#24-JY7383RPEE	CATTGGTGGTTCAGTGGTAGAATT	5_tRF	15	0	0	16	25	0	0	0	0	12	0	0	0	0	0	0	0	0	0	0
tRF#20-789LV47P	GTTGGTGGTATAGTGGTTAG	5_tRF	11	0	0	20	27	0	0	0	0	0	0	0	0	0	0	0	0	0	0	10
tRF#36-K5I34JRX6N38Z9B	CCCACATGGTCTAGCGGTTAGGATTCCTGGTTTTCA	5_tRNA_halve	51	0	0	0	0	0	0	0	0	0	0	0	0	0	0	0	0	17	0	0
tRF#34-69JP4PRNFJE8JQ	GGCTCCATAGCTCAGGGGTTAGAGCACTGGTCTT	5_tRNA_halve	68	0	0	0	0	0	0	0	0	0	0	0	0	0	0	0	0	0	0	0
tRF#19-7B0RH92W	GTGAAACCCCATCTCTACT	5_U_tRF	13	0	0	0	0	55	0	0	0	0	0	0	0	0	0	0	0	0	0	0
tRF#22-RX6NMH491	GGTTAGGATTCGGCGCTCTCAC	i-tRF	0	0	16	26	0	0	0	0	0	0	0	0	0	0	0	0	0	0	0	25
tRF#20-94SX73V2	TGGTGGTCTAGTGGTTAGGA	5_tRF	21	0	0	0	25	0	0	0	0	0	0	0	0	0	0	0	0	0	0	21
tRF#22-11M3WE8SM	AGGCCCGGGTTCGATTCCCGGC	i-tRF	0	0	0	0	0	0	0	33	21	13	0	0	0	0	0	0	0	0	0	0
tRF#23-SP5830MM0F	GTCAGGATGGCCGAGCGGTCTAA	5_tRF	19.998	0	25.002	0	0	0	0	0	0	0	0	0	11	11	0	0	0	0	0	0
tRF#29-JP9P9NH5SYHQ	CATAGTGTAGTGGTTATCACGTCTGCTTT	i-tRF	18	0	0	0	0	0	0	0	0	0	0	0	0	0	0	0	0	35	14	0
tRF#31-7RH3S3RX8HWVE	GTTCCATAGTGTAGTGGTTATCACGTCTGCT	5_tRF	0	0	0	0	21	0	0	0	0	0	0	0	0	0	0	0	0	28	0	18
tRF#25-SL735L8RPY	GTATAGTGGTGAGTATCCCCGCCTG	i-tRF	19	0	11	0	0	0	12	0	0	0	0	0	0	0	0	0	0	0	10	15
tRF#39-97FUJ09N2NK1ZSI8	TGTCTAGCGACAGAGTGGTTCAATTCCACCTTTCGGGCG	3_tRF	0	0	0	0	0	0	0	0	29	0	38	0	0	0	0	0	0	0	0	0
tRF#21-HJ839L5FE	ATAGCTCAGTTGGTAGAGCAT	i-tRF	0	0	0	0	0	0	0	14	0	41	0	0	0	0	0	0	0	0	12	0
tRF#38-Q86N7KYUSRHYRSD2	GCTGGGGATTGTGGGTTCGAGTCCCATCTGGGTCGCCA	3_tRNA_halve	0	0	32	35	0	0	0	0	0	0	0	0	0	0	0	0	0	0	0	0
tRF#18-EHR959DK	ACGCGGGTTCGATTCCCG	i-tRF	0	0	0	0	0	0	0	30	0	37	0	0	0	0	0	0	0	0	0	0
tRF#26-6S7P4PZ3V0D	GGCCGGTTAGCTCAGTTGGTTAGAGC	5_tRF	46.998	0	0	0	0	0	0	20	0	0	0	0	0	0	0	0	0	0	0	0
tRF#29-XN4VZ87HFKJJ	TGATTCTCGCTTTGGGTGCGAGAGGTCCC	i-tRF	0	0	27	13.998	0	0	13.998	0	0	0	0	0	0	0	0	0	0	0	0	12
tRF#29-1MP34RN26WIZ	AGGTCGCAGTCTCCCCTGGAGGCGTGGGT	i-tRF	23.004	0	0	0	0	0	0	0	0	0	0	0	0	0	0	0	0	18	0	25.002
tRF#20-Z87HFK8S	TTTGGGTGCGAGAGGTCCCG	i-tRF	0	0	10	0	0	0	11	0	0	0	0	0	0	0	0	0	0	20	0	25
tRF#19-8R90Q42E	TCCCCTGGAGGCGTGGGTT	i-tRF	0	0	25	19	0	0	0	0	0	0	0	0	0	0	0	0	0	0	11	11
tRF#20-UJJKIWRN	TAAGCCAGGGATTGTGGGTT	i-tRF	18	15	0	0	0	0	0	0	0	0	0	0	0	0	0	0	0	0	0	33
tRF#27-MEF91SS2PMH	CGGATAGCTCAGTCGGTAGAGCATCAG	5_tRF	0	0	21	12	16.998	0	0	0	0	0	0	0	0	0	0	0	0	0	0	16.002
tRF#26-V47PVR3196D	TAGTGGTTAGTATCCCCGCCTGTCAC	i-tRF	0	0	14	0	0	28	10	0	0	0	0	0	0	0	0	0	0	0	0	14
tRF#24-2VNLHRF5KP	CACGCCTGTAATCCCAGCACTTTG	3_U_tRF	0	0	0	0	0	66	0	0	0	0	0	0	0	0	0	0	0	0	0	0
tRF#21-1Y7PFWRVE	AGTTGGTTAGAGCGTGGTGCT	i-tRF	66	0	0	0	0	0	0	0	0	0	0	0	0	0	0	0	0	0	0	0
tRF#20-18Y3E7QN	AGTGGTTAGTACTCTGCGTT	i-tRF	27.999	0	16.002	0	0	0	0	0	0	0	0	0	0	0	0	0	0	10.998	10.998	0
tRF#35-EH623K7SIR3DR2	ACGCGGGAGACCGGGGTTCGATTCCCCGACGGGGA	3_tRNA_halve	35.004	0	0	14.004	0	0	0	0	0	0	0	0	0	0	0	0	0	15.996	0	0
tRF#25-I89NJ4S2I7	ATTGGTGGTTCAGTGGTAGAATTCT	5_tRF	0	0	0	27	0	20	0	0	18	0	0	0	0	0	0	0	0	0	0	0
tRF#28-I89NJ4S2I7DM	ATTGGTGGTTCAGTGGTAGAATTCTCGC	5_tRF	0	0	13	18	19	0	15	0	0	0	0	0	0	0	0	0	0	0	0	0
tRF#27-QK11M3WE8SM	GCGGGAGGCCCGGGTTCGATTCCCGGC	i-tRF	0	0	0	0	0	0	0	0	47	0	18	0	0	0	0	0	0	0	0	0
tRF#30-Y3H3RUSMKVNM	TTAGTATAGTGGTGAGTATCCCCGCCTGTC	i-tRF	20	0	0	0	0	0	0	0	0	0	0	0	0	0	0	0	0	17	28	0
tRF#21-9JQKZLEZE	TGGGCGCGGGTTGTAACTTTT	3_U_tRF	0	16	0	0	17	0	0	0	0	0	0	0	0	22	0	10	0	0	0	0
tRF#26-BUW60XY9BIE	AACGATCTCAACCTATTCTCAAACTT	5_U_tRF	0	0	18	28	0	19	0	0	0	0	0	0	0	0	0	0	0	0	0	0
tRF#22-NKPYNRSZQ	CTGGGGCCTGCTTCCGTCTTTT	3_U_tRF	0	0	13	26	16	0	10	0	0	0	0	0	0	0	0	0	0	0	0	0
tRF#25-RKVP4P73FJ	GGGGGTATAGCTCAGGTGGTAGAGC	5_tRF	0	0	0	0	0	0	0	0	0	65	0	0	0	0	0	0	0	0	0	0
tRF#20-Q86774ZZ	GCTGGGGCCTGTGTGTTTTT	3_U_tRF	0	0	10	0	0	29	10	0	0	0	0	0	0	0	0	0	0	0	16	0
tRF#26-18YKISQI45D	AGTGGTTAGGATTCGGCGCTCTCACC	i-tRF	0	0	17	15	16	0	0	0	0	0	0	0	0	0	0	0	0	0	0	16
tRF#26-87R8WP9I1EE	TCCCTGGTGGTCTAGTGGCTAGGATT	5_tRF	50	0	0	0	0	0	0	0	0	0	0	0	0	0	0	14	0	0	0	0
tRF#21-UMKJV9100	TAATCCCAGCTATTCAGGAGG	3_U_tRF	0	0	0	12	0	33	0	0	0	0	0	0	0	0	0	0	0	0	19	0
tRF#19-0RH9UZ06	ACCCCATCTCTACTTAAAA	5_U_tRF	20	0	0	0	0	44	0	0	0	0	0	0	0	0	0	0	0	0	0	0
tRF#24-K8HJ83MLH9	CCCGGATAGCTCAGTCGGTAGAGC	5_tRF	0	0	0	0	0	0	0	0	0	64	0	0	0	0	0	0	0	0	0	0
tRF#22-N3R718YKI	CTGGTGGTCTAGTGGTTAGGAT	5_tRF	13	0	10	0	0	0	0	0	0	0	0	0	0	0	0	13	0	13	0	15
tRF#30-79MP9P9MH57S	GTTTCCGTAGTGTAGTGGTCATCACGTTCG	5_tRF	63	0	0	0	0	0	0	0	0	0	0	0	0	0	0	0	0	0	0	0
tRF#22-PHP0R0ZWQ	GCACGGCAAGGGGAGTTTGTTT	3_U_tRF	0	0	0	19	18	0	0	0	0	0	0	0	0	11	0	0	0	0	15	0
tRF#21-PS5U8918E	GCCCGGATGATCCTCAGTGGT	5_tRF	26	12	0	0	0	0	0	0	0	0	0	14	0	0	0	0	0	0	11	0
tRF#21-O7M8LO9L0	GACCTCGTGGCGCAATGGTAG	5_tRF	0	0	0	0	0	0	0	0	0	0	0	0	20	30	0	0	0	0	0	13
tRF#25-RN2NKSEK51	GGGTTCAATTCCCCGACGGGGAGCC	3_tRF	33	0	0	0	0	0	0	0	0	12	0	0	0	0	0	18	0	0	0	0
tRF#18-BS6PDFD2	AACCGGGCAGAAGCACCA	3_tRF	0	0	10	0	0	0	13	0	0	0	0	0	0	0	0	0	0	14	0	26
tRF#22-LM8D4N4O1	CGATCTCAACCTATTCTCAAAC	5_U_tRF	0	0	10	30	23	0	0	0	0	0	0	0	0	0	0	0	0	0	0	0
tRF#20-KVPKYUH7	CCCGCGCAGGTTCGAATCCT	i-tRF	0	0	0	0	0	0	0	0	0	0	37	26	0	0	0	0	0	0	0	0
tRF#25-FP18LPMBQ4	AGCAGAGTGGCGCAGCGGAAGCGTG	5_tRF	62.001	0	0	0	0	0	0	0	0	0	0	0	0	0	0	0	0	0	0	0
tRF#29-87R8WP9I1EJ4	TCCCTGGTGGTCTAGTGGCTAGGATTCGG	5_tRF	33	0	18	0	0	0	0	0	0	0	0	0	0	0	0	11	0	0	0	0
tRF#34-XSXMSL73VL4YHE	TGCCGTGATCGTATAGTGGTTAGTACTCTGCGTT	5_tRF	62	0	0	0	0	0	0	0	0	0	0	0	0	0	0	0	0	0	0	0
tRF#25-941QKS3W2V	TGGTGAGTATCCCCGCCTGTCACGC	i-tRF	0	0	24	0	19	0	0	0	0	0	0	0	0	0	0	0	0	0	0	19
tRF#20-8E85N9RH	TCAATTCCACCTTTCGGGCG	3_tRF	0	0	0	0	0	0	0	0	10	52	0	0	0	0	0	0	0	0	0	0
tRF#22-D9W1X6L8L	AATTCTCGCCTGCCACGCGGGA	i-tRF	0	0	12	0	0	0	17	32	0	0	0	0	0	0	0	0	0	0	0	0
tRF#22-R4L2RRM35	GGGTGCGAGAGGTCCCGGGTTC	i-tRF	49	0	0	0	0	0	0	0	0	0	0	0	0	0	0	0	0	0	12	0
tRF#27-S3S3R68HYV3	GTAGTGTAGTGGTCATCACGTTCGCCT	i-tRF	38	0	0	0	0	0	0	0	0	0	0	0	0	0	0	0	0	23	0	0
tRF#39-QP4PW3FJIKE7UM1H	GCTAGCTCAGTCGGTAGAGCATGGGACTCTTAATCCCAG	i-tRF	0	0	23.001	27.999	0	0	0	0	0	0	0	0	0	10	0	0	0	0	0	0
tRF#32-M1M3WD8S746D2	CGGCCCGGGTTCGACTCCCGGTGTGGGAACCA	3_tRF	0	0	37	24	0	0	0	0	0	0	0	0	0	0	0	0	0	0	0	0
tRF#37-Z46DD8282K69RQQ	TTGTGGGAACAATGGCACGGCAAGGGGCTCGGTATTT	3_U_tRF	0	0	0	0	0	0	0	0	0	0	0	0	0	0	31	30	0	0	0	0
tRF#19-J3WB8YJ4	CAGGTTCGAATCCTGTCGG	i-tRF	0	0	0	0	0	0	0	61	0	0	0	0	0	0	0	0	0	0	0	0
tRF#25-B689XXW27Z	AACCATCCTCTGCTATCGGAGTTTT	3_U_tRF	13	0	0	18	16	0	0	0	0	0	0	0	0	0	0	0	0	0	14	0
tRF#20-PS5P4PW3	GCCCGGATAGCTCAGTCGGT	5_tRF	31.998	0	0	0	0	0	0	0	0	0	0	0	29	0	0	0	0	0	0	0
tRF#28-32VIJMRPFQDH	CCGGATAGCTCAGTCGGTAGAGCATCAG	5_tRF	0	0	19.998	28.998	0	0	0	0	0	0	0	0	0	0	0	0	0	0	0	12
tRF#20-M91MP34R	CGTTCAGGTCGCAGTCTCCC	i-tRF	17.001	0	19.998	12.996	0	0	10.998	0	0	0	0	0	0	0	0	0	0	0	0	0
tRF#25-79MP9P9MH5	GTTTCCGTAGTGTAGTGGTCATCAC	5_tRF	60	0	0	0	0	0	0	0	0	0	0	0	0	0	0	0	0	0	0	0
tRF#21-M3Q01M3KE	CGGGTGCGAGAGGTCCCGGGT	i-tRF	0	0	36	14.001	0	0	9.999	0	0	0	0	0	0	0	0	0	0	0	0	0
tRF#31-OP18YOY63ZMJ0	GACAGAGTGGTTCAATTCCACCTTTCGGGCG	3_tRF	0	0	15	13	0	0	0	0	0	21	0	0	0	0	0	0	0	0	0	11
tRF#26-08R9D9KUMKB	ACCGGGGTTCAATTCCCCGACGGGGA	3_tRF	27	0	0	0	0	0	0	16	0	0	0	0	0	0	0	17	0	0	0	0
tRF#25-1WSP58309M	AGTGTGTCAGGATGGCCGAGTGGTC	5_U_tRF	40	20	0	0	0	0	0	0	0	0	0	0	0	0	0	0	0	0	0	0
tRF#30-0P58309NDJ78	ACCAGGATGGCCGAGTGGTTAAGGCGTTGG	5_tRF	0	10	0	0	17	0	0	0	0	0	0	0	0	0	0	0	0	0	0	33
tRF#21-93R918VBE	TGGGTGGTTCAGTGGTAGAAT	5_tRF	0	0	13	14	0	0	0	0	0	0	0	0	0	0	0	0	0	0	0	33
tRF#36-Y2R79K3BEE4O3QE	TTAGAGGTCTTGGGGCCGAAACGATCTCAACCTATT	5_U_tRF	0	0	0	10	0	0	15	0	0	0	0	0	0	0	0	35	0	0	0	0
tRF#18-W6BZUEDY	TCTCAAACTTTAAATGGG	5_U_tRF	10	0	10	14	0	0	0	0	0	0	0	0	0	10	0	0	0	0	16	0
tRF#29-J09HJHOJ7II9	CAGAGTGGCGCAGCGGAAGCGTGCTGGGC	5_tRF	9.999	0	11.997	10.998	27	0	0	0	0	0	0	0	0	0	0	0	0	0	0	0
tRF#21-18YMENL7D	AGTGGTTATCACGTTCGCCTC	i-tRF	25	13	0	0	11	0	0	0	0	0	0	0	0	0	0	0	0	10	0	0
tRF#21-WB8689SVD	TCGAATCCCATCCTCGTCGCC	3_tRF	0	0	0	0	0	0	0	0	0	59	0	0	0	0	0	0	0	0	0	0
tRF#32-RKVP4P9L5HMVQ	GGGGGTATAGCTCAGTGGTAGAGCGCGTGCTT	5_tRF	0	0	0	0	43	0	0	0	0	0	0	0	0	0	0	0	0	16	0	0
tRF#32-4O3QW6BZUERFH	CTCAACCTATTCTCAAACTTTAAATGGGCAAG	5_U_tRF	0	0	0	21	11	10	0	0	0	17	0	0	0	0	0	0	0	0	0	0
tRF#19-JJ90XPJ9	CAGGCTGGAGTGCAGTGGC	3_U_tRF	0	0	0	0	0	33	15	0	0	11	0	0	0	0	0	0	0	0	0	0
tRF#20-QNJ3LPWR	GCGTTCAGGTCGCAGTCTCC	i-tRF	47.997	0	0	0	0	0	0	0	0	0	0	0	0	0	0	0	0	0	10.998	0
tRF#21-3K7SIR3D0	CCGGGGTTCGATTCCCCGACG	i-tRF	30	0	0	0	0	0	0	0	0	0	0	0	0	14	0	0	0	0	14	0
tRF#23-7O3B1NR805	GTTAACCGAAAGGTTGGTGGTTC	i-tRF	58	0	0	0	0	0	0	0	0	0	0	0	0	0	0	0	0	0	0	0
tRF#25-08R9D9KUMK	ACCGGGGTTCAATTCCCCGACGGGG	3_tRF	44	0	0	0	0	0	0	0	0	0	0	0	0	0	0	0	0	0	0	14
tRF#23-NYDRFU8U0E	CTTTGAATCCAGCGATCCGAGTT	i-tRF	0	0	46	0	12	0	0	0	0	0	0	0	0	0	0	0	0	0	0	0
tRF#36-8KIJLJR7DJQV760	TCAGGATGGCCGAGCGGTCTAAGGCGCTGCGTTCAG	5_tRNA_halve	57.996	0	0	0	0	0	0	0	0	0	0	0	0	0	0	0	0	0	0	0
tRF#25-LPWR381H93	CGCAGTCTCCCCTGGAGGCGTGGGT	i-tRF	0	0	0	21.996	0	0	0	0	0	36	0	0	0	0	0	0	0	0	0	0
tRF#30-P27JPJ60MV9J	GCAGAGTGGCGCAGCGGAAGCGTGCTGGGC	5_tRF	41.004	0	0	0	0	0	0	0	0	0	0	0	0	0	0	0	0	16.002	0	0
tRF#20-ZKXU53K8	TTGGGTGCGAGAGGTCCCGG	i-tRF	0	0	46.998	0	0	0	0	0	0	0	0	0	0	0	0	0	0	0	0	10.002
tRF#27-Z3RQ18YJHJP	TTGGTGGTATAGTGGTTAGCATAGCTG	5_tRF	10	0	25	12	0	0	10	0	0	0	0	0	0	0	0	0	0	0	0	0
tRF#32-WN1Q18X3HRL7N	TCGTTAGTATAGTGGTGAGTATCCCCGCCTGT	5_tRNA_halve	14	0	0	0	0	0	0	0	0	0	0	0	0	0	0	0	0	12	18	13
tRF#32-RUSMKVNMEH62J	GGTGAGTATCCCCGCCTGTCACGCGGGAGACC	i-tRF	0	0	57	0	0	0	0	0	0	0	0	0	0	0	0	0	0	0	0	0
tRF#22-3SY3H3RUN	CCTCGTTAGTATAGTGGTGAGT	5_tRF	26	0	0	11	0	0	0	0	0	0	0	0	0	0	0	0	0	0	20	0
tRF#32-N6B7SJ97FUJ0P	CTTCAAACCTGTAGCTGTCTAGCGACAGAGTG	i-tRF	0	0	0	0	0	0	0	0	26	0	0	31	0	0	0	0	0	0	0	0
tRF#23-86V8WPMNY	TCCCATATGGTCTAGCGGTTAGG	5_tRF	12	14	0	0	0	0	0	0	0	0	0	21	0	10	0	0	0	0	0	0
tRF#30-H9B7I72DZOIK	ATCTCAACCTATTCTCAAACTTTAAATGGG	5_U_tRF	0	0	21	11	0	25	0	0	0	0	0	0	0	0	0	0	0	0	0	0
tRF#30-V2Y8L981PV6R	TAGGATTCGGCGCTCTCACCGCCGCGGCCC	i-tRF	0	0	19	0	10	10	0	0	0	0	0	0	0	0	0	0	0	0	0	17
tRF#30-8W1W188MENL7	TCCGTAGTGTAGTGGTCATCACGTTCGCCT	5_tRF	56	0	0	0	0	0	0	0	0	0	0	0	0	0	0	0	0	0	0	0
tRF#20-1Y7PFWRV	AGTTGGTTAGAGCGTGGTGC	i-tRF	31	0	0	0	0	0	0	0	0	0	0	0	0	0	0	0	0	0	25	0
tRF#33-Q1Q89P9L842205	GCGCCGCTGGTGTAGTGGTATCATGCAAGATTC	5_tRNA_halve	21	0	0	10	0	0	0	0	0	0	0	0	0	0	0	0	0	25	0	0
tRF#21-32XM4P9ME	CCGGATGATCCTCAGTGGTCT	5_tRF	34	0	0	0	22	0	0	0	0	0	0	0	0	0	0	0	0	0	0	0
tRF#23-9MVH7P59DP	TGGTCTAGCGGTTAGGATTCCTG	i-tRF	0	0	17	15	0	0	11	0	0	0	0	0	0	0	0	0	0	0	0	13
tRF#21-1WSP5830E	AGTGTGTCAGGATGGCCGAGT	5_U_tRF	56	0	0	0	0	0	0	0	0	0	0	0	0	0	0	0	0	0	0	0
tRF#32-KQI34JRX6N38Q	CCCATATGGTCTAGCGGTTAGGATTCCTGGTT	5_tRF	21	0	0	0	0	0	0	0	0	0	10	25	0	0	0	0	0	0	0	0
tRF#24-21V98BNXE0	CAACCTATTCTCAAACTTTAAATG	5_U_tRF	0	0	11	18	0	27	0	0	0	0	0	0	0	0	0	0	0	0	0	0
tRF#18-HRERXFD2	ATCCCACTCCTGACACCA	3_tRF	0	0	14	16.002	0	0	12.999	0	0	0	0	0	0	0	0	0	0	0	0	12.999
tRF#20-SP58309M	GTCAGGATGGCCGAGTGGTC	5_tRF	11	0	0	0	0	0	0	0	0	24	11	10	0	0	0	0	0	0	0	0
tRF#23-9LV470JPDP	TGGTATAGTGGTGAGCATAGCTG	i-tRF	0	0	24	31.998	0	0	0	0	0	0	0	0	0	0	0	0	0	0	0	0
tRF#21-947673FEE	TGGTGGTTCAGTGGTAGAATT	5_tRF	0	10	0	0	0	0	12.73	0	0	0	0	0	11.82	0	0	20.91	0	0	0	0
tRF#27-N3WEK879652	CTGGTTCGATCCCGGGTTTCGGCACCA	3_tRF	0	0	28.998	26.004	0	0	0	0	0	0	0	0	0	0	0	0	0	0	0	0
tRF#22-73H3RUPLM	GTGGTATAGTGGTGAGCATAGC	i-tRF	0	0	0	31.002	24	0	0	0	0	0	0	0	0	0	0	0	0	0	0	0
tRF#27-R8YP9LON4V3	GGTGGTTCAGTGGTAGAATTCTCGCCT	i-tRF	22	0	0	0	0	0	0	0	0	0	0	0	0	0	0	0	0	19	14	0
tRF#30-7RH3S3RX8HWV	GTTCCATAGTGTAGTGGTTATCACGTCTGC	5_tRF	0	0	32	0	0	0	23	0	0	0	0	0	0	0	0	0	0	0	0	0
tRF#30-KL7L73V6M7QZ	CCATAGTGTAGTGGTTATCACGTCTGCTTT	5_tRNA_halve	18	0	0	0	0	0	0	0	0	0	0	0	0	0	0	0	0	26	11	0
tRF#23-R3YSV4V40E	GGGGTTTCCGTAGTGTAGTGGTT	5_U_tRF	55	0	0	0	0	0	0	0	0	0	0	0	0	0	0	0	0	0	0	0
tRF#32-I7XUK87SIRMJ4	ATTCTTGCGACCCGGGTTCGATTCCCGGGCGG	i-tRF	0	0	0	0	0	18	15	0	0	0	0	0	0	0	0	22	0	0	0	0
tRF#31-RKVP4P9L5FZUD	GGGGGTATAGCTCAGTGGTAGAGCATTTGAC	5_tRF	23	11	0	0	0	0	0	0	0	0	0	0	0	0	0	0	0	0	0	21
tRF#28-N3R718YKISD8	CTGGTGGTCTAGTGGTTAGGATTCGGCG	5_tRF	0	0	0	0	19	0	0	0	0	0	0	0	14	0	0	21	0	0	0	0
tRF#21-ORRNLNK8D	GACCCGGGTTCGATTCCCGGC	i-tRF	0	0	0	0	0	0	0	54	0	0	0	0	0	0	0	0	0	0	0	0
tRF#22-RQ18YJHJP	GGTATAGTGGTTAGCATAGCTG	i-tRF	0	0	15	27	0	0	12	0	0	0	0	0	0	0	0	0	0	0	0	0
tRF#36-7RH3S3RX8HWVZ5B	GTTCCATAGTGTAGTGGTTATCACGTCTGCTTTACA	5_tRNA_halve	0	0	0	43	0	0	0	0	0	0	0	0	0	0	0	0	0	11	0	0
tRF#20-PJ60MV9J	GCAGCGGAAGCGTGCTGGGC	i-tRF	12	0	0	0	0	0	0	31	0	0	0	11	0	0	0	0	0	0	0	0
tRF#22-04SXQ3V2Q	ACATGGTCTAGCGGTTAGGATT	5_tRF	29	0	0	0	0	0	0	0	0	0	0	0	0	0	0	0	0	0	25	0
tRF#19-5KYUHRKK	GAGGGTTCGAATCCCTTCG	i-tRF	0	0	0	0	0	0	0	41	0	13	0	0	0	0	0	0	0	0	0	0
tRF#40-18YKISQI45LSM1M3	AGTGGTTAGGATTCGGCGCTCTCACCGCCGCGGCCCGGGT	i-tRF	0	0	10	21	0	0	0	0	0	0	0	0	0	0	0	0	0	0	0	23
tRF#21-Q3V2Y7RZE	GCGGTTAGGATTCCTGGTTTT	i-tRF	54	0	0	0	0	0	0	0	0	0	0	0	0	0	0	0	0	0	0	0
tRF#24-V47PVR31KD	TAGTGGTTAGTATCCCCGCCTGTC	i-tRF	16	0	17	21	0	0	0	0	0	0	0	0	0	0	0	0	0	0	0	0
tRF#36-NVORRNLNK8QJP1B	CTTGCGACCCGGGTTCGATTCCCGGGCGGCGCACCA	3_tRNA_halve	0	0	10	27	0	17	0	0	0	0	0	0	0	0	0	0	0	0	0	0
tRF#26-R3HJ83RPFQE	GGGGTATAGCTCAGTGGTAGAGCATT	5_tRF	0	0	0	0	0	0	0	31	0	23	0	0	0	0	0	0	0	0	0	0
tRF#29-3JWB6IWM9OKQ	CCGGCTCGAAGGACTTCGTCTGTAATTTT	3_U_tRF	0	0	0	30	0	24	0	0	0	0	0	0	0	0	0	0	0	0	0	0
tRF#19-86PIZKE9	TCCCAGCACTTTGGGAGGC	3_U_tRF	0	0	0	0	0	53.999	0	0	0	0	0	0	0	0	0	0	0	0	0	0
tRF#23-6NMH490VDM	GGATTCGGCGCTCTCACCGCCGC	i-tRF	0	0	18	17	0	0	18	0	0	0	0	0	0	0	0	0	0	0	0	0
tRF#21-RV50SRRND	GGTGCGAGAGGTCCCGGGTTC	i-tRF	34	0	0	0	0	0	0	0	0	0	0	0	0	0	0	0	0	0	19	0
tRF#24-F91SS2P4IR	AGCTCAGTCGGTAGAGCATGGGAC	i-tRF	0	0	18	11	0	0	0	0	0	0	0	0	0	0	0	0	0	0	0	24
tRF#22-YRI7XUK8N	TTCCCATTCTTGCGACCCGGGT	i-tRF	0	0	11	0	19	0	12	0	0	0	0	0	0	0	0	0	0	0	0	11
tRF#26-N3S3RQJVDEE	CTGGTGTAGTGGTATCATGCAAGATT	i-tRF	33	0	0	0	20	0	0	0	0	0	0	0	0	0	0	0	0	0	0	0
tRF#22-SP58309MO	GTCAGGATGGCCGAGTGGTCTA	5_tRF	17	0	0	0	0	0	0	0	0	0	0	0	0	14	10	12	0	0	0	0
tRF#25-R8VP94FQFY	GGTGGTATAGTGGTGAGCATAGCTG	i-tRF	10.002	0	19.998	0	12	0	10.998	0	0	0	0	0	0	0	0	0	0	0	0	0
tRF#37-LBRR33WB08Q2B52	CGAAAGGTCCCCGGTTCGAAACCGGGCGGAAACACCA	3_tRNA_halve	42.994	0	0	0	0	0	0	0	9.996	0	0	0	0	0	0	0	0	0	0	0
tRF#31-XMSL73VL4YMYE	TGATCGTATAGTGGTTAGTACTCTGCGTTGT	5_tRNA_halve	12.996	0	0	0	0	0	0	0	0	0	0	0	0	0	0	0	0	24.003	15.003	0
tRF#21-HDK2RSI2E	ATAACCCAGAGGTCGATGGAT	i-tRF	10.998	0	0	0	0	0	0	0	0	0	0	0	0	0	0	0	0	41.004	0	0
tRF#23-K8HJ83MLDS	CCCGGATAGCTCAGTCGGTAGAG	5_tRF	0	0	0	0	0	0	0	0	12	0	0	28.002	0	0	0	0	0	0	12	0
tRF#38-FLP27JPJ60MV9JD2	AGATAGCAGAGTGGCGCAGCGGAAGCGTGCTGGGCCCA	5_U_tRNA_halve	52	0	0	0	0	0	0	0	0	0	0	0	0	0	0	0	0	0	0	0
tRF#20-ME5R83R7	CGGATGATCCTCAGTGGTCT	5_tRF	52	0	0	0	0	0	0	0	0	0	0	0	0	0	0	0	0	0	0	0
tRF#31-1S91547O6U9DE	AGTCGTGGCCGAGTGGTTAAGGCGATGGACT	5_tRF	0	0	0	0	0	0	0	0	0	0	0	0	0	0	0	0	0	0	52	0
tRF#31-QNR8VP9LFQFYD	GCGTTGGTGGTATAGTGGTAAGCATAGCTGC	5_tRF	0	0	15	0	10	0	15	0	0	0	0	0	12	0	0	0	0	0	0	0
tRF#21-ER9LQZ1NE	ACTCCTGGTAGCTTTAGGTTT	3_U_tRF	41	11	0	0	0	0	0	0	0	0	0	0	0	0	0	0	0	0	0	0
tRF#25-0Q37QQM0ZZ	ACCATCCTCTGCTATCGGAGTTTTT	3_U_tRF	14	12	0	0	0	0	0	0	0	0	0	0	0	0	0	0	0	0	26	0
tRF#21-WP9N1EWJ0	TCTAGTGGTTAGGATTCGGCG	i-tRF	0	0	0	17	0	0	0	0	0	0	0	0	0	0	0	0	0	0	17	17
tRF#23-J4S2I7L7DV	CAGTGGTAGAATTCTCGCCTGCC	i-tRF	13	0	27	0	0	0	0	0	0	0	0	0	0	0	0	0	0	11	0	0
tRF#22-9O0PRMQ0Q	TGTAAACCAGGGGTCGCGAGTT	i-tRF	0	0	20	20	0	0	0	0	0	0	0	0	0	0	0	0	0	0	0	11
tRF#30-7PVP941QKS3W	GTTAGTATAGTGGTGAGTATCCCCGCCTGT	i-tRF	0	0	0	0	0	0	0	0	0	19	0	0	0	0	0	0	0	14	18	0
tRF#23-R71KVUY9DW	GGTCTAGGGGTATGATTCTCGCT	i-tRF	0	0	24	27	0	0	0	0	0	0	0	0	0	0	0	0	0	0	0	0
tRF#20-RML2RRM3	GGGTCCGAGAGGTCCCGGGT	i-tRF	0	0	13	0	23	0	15	0	0	0	0	0	0	0	0	0	0	0	0	0
tRF#30-ZH0SR9593KMH	TTGCGACCCGGGTTCGATTCCCGGGCGGCG	3_tRF	0	0	0	0	0	0	0	0	18	20	0	0	0	0	0	13	0	0	0	0
tRF#23-R73290Q4DZ	GGTCTCCGGATGGAGGCGTGGGT	i-tRF	0	0	0	36	15	0	0	0	0	0	0	0	0	0	0	0	0	0	0	0
tRF#21-D6PUMZQZE	AATCAGCCGACGTTTGCTTTT	3_U_tRF	0	0	51	0	0	0	0	0	0	0	0	0	0	0	0	0	0	0	0	0
tRF#25-NLHRF5Z85J	CTGTAATCCCAGCACTTTGGGAGGC	3_U_tRF	0	0	0	0	0	51	0	0	0	0	0	0	0	0	0	0	0	0	0	0
tRF#21-1MQKYU8R0	AGGTCGCGGGTTCGATCCCCG	i-tRF	0	0	0	0	0	0	0	41	0	0	0	0	0	0	0	0	0	0	10	0
tRF#17-RNLEKZK	GGGTTCGAATCCCTTCG	i-tRF	0	0	0	0	0	0	0	32	0	19	0	0	0	0	0	0	0	0	0	0
tRF#21-6LQ6S8V0D	GGATAGCTCAGTCGGTAGAGC	5_tRF	10.997	0	15.001	24.997	0	0	0	0	0	0	0	0	0	0	0	0	0	0	0	0
tRF#17-SP5830K	GTCAGGATGGCCGAGCG	5_tRF	0	0	38.997	0	0	0	0	0	0	0	0	0	0	0	0	0	0	0	0	11.997
tRF#35-34HWH3RXSINHZ4	CCGTGATCGTATAGTGGTTAGTACTCTGCGTTGTG	5_tRNA_halve	0	0	0	0	0	0	0	0	0	0	0	30.996	0	0	0	0	0	19.998	0	0
tRF#32-M2OSRNLNKSEKL	CGGGAGACCGGGGTTCGATTCCCCGACGGGGA	3_tRNA_halve	0	0	0	36	0	0	0	0	14.004	0	0	0	0	0	0	0	0	0	0	0
tRF#26-Z3R918VBY90	TTGGTGGTTCAGTGGTAGAATTCTCG	5_tRF	0	0	20	11	19	0	0	0	0	0	0	0	0	0	0	0	0	0	0	0
tRF#25-Z3RQ18YJHJ	TTGGTGGTATAGTGGTTAGCATAGC	5_tRF	0	0	0	0	0	39	0	0	0	0	0	0	0	0	0	0	0	0	0	11
tRF#28-7PVP941QKSD3	GTTAGTATAGTGGTGAGTATCCCCGCCT	i-tRF	16	0	0	0	0	0	0	0	0	0	0	0	0	0	0	0	0	0	34	0
tRF#24-X3HRL7S5I4	TGAGTATCCCCGCCTGTCACGCGG	i-tRF	0	0	50	0	0	0	0	0	0	0	0	0	0	0	0	0	0	0	0	0
tRF#16-Y63ZMJ0	TTCCACCTTTCGGGCG	3_tRF	0	0	0	0	0	0	0	0	0	0	0	0	24	11	0	15	0	0	0	0
tRF#25-R29P4P9L5H	GGGGATGTAGCTCAGTGGTAGAGCG	5_tRF	0	0	13	0	0	37	0	0	0	0	0	0	0	0	0	0	0	0	0	0
tRF#34-HM21YP4LR45DKQ	ATATCCAACCTTCAGCTATAGGGTGGAGACTTTT	3_U_tRF	0	0	50	0	0	0	0	0	0	0	0	0	0	0	0	0	0	0	0	0
tRF#26-B689XXW27ZE	AACCATCCTCTGCTATCGGAGTTTTT	3_U_tRF	0	12	13	11	0	0	0	0	0	0	0	0	0	0	0	0	0	0	14	0
tRF#49-PS5U8918W8RV1I8B3WEW	GCCCGGATGATCCTCAGTGGTCTGGGGTGCAGGCTTCAAACCTGTAGCT	5_tRF	0	0	0	0	0	0	0	0	0	20	0	0	0	0	0	30	0	0	0	0
tRF#36-RKVPNPML5FZUNF0	GGGGGTATAGCTTAGCGGTAGAGCATTTGACTGCAG	5_tRNA_halve	50	0	0	0	0	0	0	0	0	0	0	0	0	0	0	0	0	0	0	0
tRF#44-N1EH6KK87SIRM1DVE2	CTGCCACGCGGGAGGCCCGGGTTCGATTCCCGGCCAATGCACCA	3_tRF	0	0	0	0	0	0	0	10.998	0	0	0	0	0	0	0	39	0	0	0	0
tRF#23-R718YKISD8	GGTCTAGTGGTTAGGATTCGGCG	i-tRF	22	0	12	0	15	0	0	0	0	0	0	0	0	0	0	0	0	0	0	0
tRF#21-I89NJ4S2B	ATTGGTGGTTCAGTGGTAGAA	5_tRF	0	0	0	0	30	0	0	0	0	0	0	0	0	0	0	0	0	0	0	19
tRF#22-I89NJ4S2I	ATTGGTGGTTCAGTGGTAGAAT	5_tRF	10	0	0	14	25	0	0	0	0	0	0	0	0	0	0	0	0	0	0	0
tRF#28-MP9P9MH57SD3	CGTAGTGTAGTGGTCATCACGTTCGCCT	i-tRF	13	0	0	0	0	0	0	0	0	0	0	0	0	0	0	0	0	20	16	0
tRF#22-PS5U89185	GCCCGGATGATCCTCAGTGGTC	5_tRF	49	0	0	0	0	0	0	0	0	0	0	0	0	0	0	0	0	0	0	0
tRF#28-834QD7OKW4Z	TCAGTCTCATAATCTGAAGGTCGTGAGT	i-tRF	0	0	24	15	0	0	0	0	0	0	0	0	0	0	0	0	0	0	0	10
tRF#21-XEKJ5R5ND	TGAATCCAGCGATCCGAGTTC	i-tRF	0	0	10	12	16	0	0	0	0	0	0	0	0	0	0	0	0	11	0	0
tRF#24-VLV47PVR1M	TAGTATAGTGGTTAGTATCCCCGC	i-tRF	0	0	0	0	0	0	0	36	0	0	0	13	0	0	0	0	0	0	0	0
tRF#34-L85DMKYUYRLHIX	CGCGGGAGACCGGGGTTCGATTCCCCGACGGGGA	3_tRNA_halve	18	0	0	0	0	0	0	0	0	21	0	10	0	0	0	0	0	0	0	0
tRF#24-SL73VL4YHE	GTATAGTGGTTAGTACTCTGCGTT	i-tRF	36	0	0	0	0	0	0	0	0	0	0	0	0	0	0	0	0	12.996	0	0
tRF#32-S4I7LZ93Q01MJ	GTATGATTCTCGCTTTGGGTGCGAGAGGTCCC	i-tRF	0	0	16.998	0	0	0	0	0	0	0	0	0	0	0	0	0	0	0	0	31.002
tRF#25-R8VP9NFQFY	GGTGGTATAGTGGTTAGCATAGCTG	i-tRF	17	0	14	0	0	0	0	0	0	0	0	0	0	0	0	0	0	0	0	17
tRF#30-3KMB0F4BBM3Z	CCGGGCGGAAACACACTAAAAAATCCCTTT	3_U_tRF	19	0	0	0	0	0	0	0	0	0	0	0	0	0	10	0	0	0	19	0
tRF#26-Q1Q89P9L84D	GCGCCGCTGGTGTAGTGGTATCATGC	5_tRF	17	0	0	0	0	0	0	0	14	17	0	0	0	0	0	0	0	0	0	0
tRF#25-59KNNVORRN	GATTCCCATTCTTGCGACCCGGGTT	i-tRF	0	0	22	0	0	26	0	0	0	0	0	0	0	0	0	0	0	0	0	0
tRF#34-86V8WPMN1E8Y2Q	TCCCATATGGTCTAGCGGTTAGGATTCCTGGTTT	5_tRNA_halve	32	0	0	0	0	0	0	0	0	0	0	0	0	0	0	0	0	16	0	0
tRF#20-FMF0QV7N	AGATCAGAAGGCTGCGTGTT	i-tRF	24	0	24	0	0	0	0	0	0	0	0	0	0	0	0	0	0	0	0	0
tRF#45-PS5P4PW3FJHPEZUMXK	GCCCGGATAGCTCAGTCGGTAGAGCATCAGACTTTTAATCTGAGG	5_tRF	26	0	0	0	0	0	0	0	0	0	0	0	0	0	10	12	0	0	0	0
tRF#22-9IJVNLSRH	TGGCTCATGCCTGTAGTCCCAG	3_U_tRF	33	0	0	0	0	0	0	0	0	0	0	0	0	0	0	0	0	0	0	15
tRF#33-QNR8VP94FQFYD3	GCGTTGGTGGTATAGTGGTGAGCATAGCTGCCT	5_tRF	37.002	0	0	0	0	0	0	0	0	0	0	0	0	0	0	0	0	10.002	0	0
tRF#30-R95933JKDURZ	GGTTCGATTCCCGGTCAGGGAATGAGGTTT	3_U_tRF	34	0	0	0	0	0	0	0	0	0	0	0	0	0	0	0	0	0	13	0
tRF#32-9NJ4S2I7L7P5M	TGGTTCAGTGGTAGAATTCTCGCCTGCCACGC	i-tRF	0	0	25	0	0	0	0	0	0	0	0	0	0	0	0	0	0	0	0	22
tRF#20-S2I7L7P5	GTAGAATTCTCGCCTGCCAC	i-tRF	0	0	13	34	0	0	0	0	0	0	0	0	0	0	0	0	0	0	0	0
tRF#20-MQ18Y3E7	CGTATAGTGGTTAGTACTCT	i-tRF	36	0	0	0	0	0	0	0	0	0	0	0	0	0	0	0	0	0	0	11
tRF#24-47D112Z42E	CTCCTAAGCCAGGGATTGTGGGTT	i-tRF	14	0	0	0	0	0	0	0	0	0	0	0	0	0	0	0	0	0	15	18
tRF#20-1KVUY9QZ	AGGGGTATGATTCTCGCTTT	i-tRF	0	0	0	0	0	0	0	0	0	0	0	0	0	0	0	0	0	0	47	0
tRF#36-FLP27JPJ60MV9JD	AGATAGCAGAGTGGCGCAGCGGAAGCGTGCTGGGCC	other	47	0	0	0	0	0	0	0	0	0	0	0	0	0	0	0	0	0	0	0
tRF#21-N3S3RQJVB	CTGGTGTAGTGGTATCATGCA	i-tRF	11	0	15	21	0	0	0	0	0	0	0	0	0	0	0	0	0	0	0	0
tRF#27-ZH0SR9593KK	TTGCGACCCGGGTTCGATTCCCGGGCG	i-tRF	0	0	0	0	0	0	0	0	47	0	0	0	0	0	0	0	0	0	0	0
tRF#25-S9HENBRSX3	GTCTCATAATCTGAAGGTCGTGAGT	i-tRF	0	0	0	0	11	0	15	0	0	0	0	0	0	0	0	0	0	11	0	10
tRF#33-7SER9I69QESY0Q	GTTCGACTCCTGGCTGGCTCGCGATGTCTGTTT	3_U_tRF	14	13	0	0	0	0	0	0	0	0	0	0	0	0	0	0	0	0	20	0
tRF#25-QSD2NSWWDZ	GCTCGAAGGACTTCGTCTGTAATTT	3_U_tRF	0	0	0	47	0	0	0	0	0	0	0	0	0	0	0	0	0	0	0	0
tRF#20-P8YJ839L	GCCGGTTAGCTCAGTTGGTA	5_tRF	0	0	0	0	0	0	0	0	0	34	0	0	0	0	0	0	0	0	13	0
tRF#24-K88KB3D12Q	CCCGGTCAGGAAAGTAAGCCGTTT	3_U_tRF	10	0	0	0	15	0	0	0	0	0	0	0	0	0	0	10	0	0	12	0
tRF#25-MUWLV47PU9	CGTGATCGTATAGTGGTTAGTACTC	5_tRF	11.997	0	0	14.004	0	20.997	0	0	0	0	0	0	0	0	0	0	0	0	0	0
tRF#17-RPM830K	GGTAGCGTGGCCGAGCG	5_tRF	0	0	9.999	0	0	25.002	0	0	0	0	0	0	0	0	0	0	0	11.997	0	0
tRF#27-Z3RQ18XJHJP	TTGGTGGTATAGTGGTGAGCATAGCTG	5_tRF	0	0	21	15	10.002	0	0	0	0	0	0	0	0	0	0	0	0	0	0	0
tRF#21-FMF07V7ND	AGATCAGAAGGTTGCGTGTTC	i-tRF	46.002	0	0	0	0	0	0	0	0	0	0	0	0	0	0	0	0	0	0	0
tRF#30-IEWSNYRV50SR	ATGATTCTCGCTTTGGGTGCGAGAGGTCCC	i-tRF	0	0	0	13.998	10.002	0	0	0	0	0	0	0	0	0	0	0	0	0	0	22.002
tRF#20-SX73V2Y8	GTCTAGTGGTTAGGATTCGG	i-tRF	12	0	0	0	0	0	0	0	0	0	0	0	0	0	0	0	0	21	0	13
tRF#33-FEWS3V2VR0PSDZ	AGAATTCTCGCCTGCCACGCGGGAGGCCCGGGT	i-tRF	0	0	0	25	0	0	0	10	0	0	0	0	0	0	0	0	0	0	0	11
tRF#23-9LV47PJPDP	TGGTATAGTGGTTAGCATAGCTG	i-tRF	13	0	14	0	0	0	0	0	0	0	0	0	0	0	0	0	0	0	0	19
tRF#26-Q2B5EOBEKZE	GCGGAAACACACTAAAAAATCCCTTT	3_U_tRF	19	0	0	0	0	0	0	0	0	0	0	0	0	0	0	0	0	0	17	10
tRF#19-RPM8301Z	GGTAGCGTGGCCGAGCGGT	5_tRF	0	0	0	0	0	0	0	0	0	0	0	0	10	0	0	36	0	0	0	0
tRF#24-QNR8VP9LEU	GCGTTGGTGGTATAGTGGTAAGCA	5_tRF	0	0	19	13	0	0	14	0	0	0	0	0	0	0	0	0	0	0	0	0
tRF#22-5J10DRNU1	GAGGCAGGAGAATCCCTTGAAC	3_U_tRF	0	0	0	0	0	46	0	0	0	0	0	0	0	0	0	0	0	0	0	0
tRF#33-R29P4P9L5HJV05	GGGGATGTAGCTCAGTGGTAGAGCGCATGCTTC	5_tRNA_halve	21	0	0	0	0	0	0	0	0	0	0	0	0	0	0	0	0	15	10	0
tRF#22-R8WP9N1E5	GGTGGTCTAGTGGTTAGGATTC	i-tRF	0	0	0	0	21	0	0	0	0	0	0	0	0	0	0	0	0	0	12	13
tRF#17-VLV47PO	TAGTATAGTGGTTAGTA	i-tRF	0	0	0	0	0	0	0	0	0	0	0	46	0	0	0	0	0	0	0	0
tRF#30-J3LPWR381H93	CAGGTCGCAGTCTCCCCTGGAGGCGTGGGT	i-tRF	0	0	0	0	0	0	10.998	0	0	0	0	0	0	0	0	0	0	11.997	0	23.004
tRF#20-R3HJ83RP	GGGGTATAGCTCAGTGGTAG	5_tRF	45.003	0	0	0	0	0	0	0	0	0	0	0	0	0	0	0	0	0	0	0
tRF#22-MKYUYRLH4	CGGGGTTCGATTCCCCGACGGG	i-tRF	10	0	0	0	35	0	0	0	0	0	0	0	0	0	0	0	0	0	0	0
tRF#20-R11EXBNZ	GGGCCAGGATTGAAACTTTT	3_U_tRF	0	0	0	0	0	0	0	0	0	0	0	0	0	0	0	11	0	0	34	0
tRF#31-ZPQR16ZSIJ7KE	TTTAGGCTCCAGTCATTTCGATGGCGTGGGT	i-tRF	0	0	0	0	0	0	0	0	0	0	0	0	0	0	0	0	0	12	0	33
tRF#20-FMF07V7N	AGATCAGAAGGTTGCGTGTT	i-tRF	28.002	0	0	16.998	0	0	0	0	0	0	0	0	0	0	0	0	0	0	0	0
tRF#32-J87383RPD9W1P	CATGGGTGGTTCAGTGGTAGAATTCTCGCCTG	5_tRNA_halve	0	0	0	0	0	0	0	0	0	16	0	18	0	0	0	0	0	0	0	11
tRF#21-HR6HFR3ZE	ATCCCGGACGAGCCCCCTTTT	3_U_tRF	0	0	10	0	0	0	14	0	0	0	0	0	0	0	0	0	0	0	0	21
tRF#37-69JP4PRNFJE8WYO	GGCTCCATAGCTCAGGGGTTAGAGCACTGGTCTTGTA	5_tRNA_halve	45	0	0	0	0	0	0	0	0	0	0	0	0	0	0	0	0	0	0	0
tRF#29-RQF918V0JZHW	GGTATAGCTCAGTGGTAGAGCATTTGACT	5_tRF	20	0	0	0	0	0	0	0	0	0	0	0	0	0	0	0	0	0	25	0
tRF#20-N3R718YK	CTGGTGGTCTAGTGGTTAGG	5_tRF	0	10	0	0	0	0	0	0	0	0	0	0	0	0	0	0	0	0	21	13
tRF#25-73V2Y8L981	GTGGTTAGGATTCGGCGCTCTCACC	i-tRF	0	0	12	11	11	0	0	0	0	0	0	0	0	0	0	0	0	10	0	0
tRF#23-9LON4VN18	TGGTAGAATTCTCGCCTGCCACG	i-tRF	0	0	22	11	0	0	0	0	0	0	0	0	0	0	0	0	0	0	0	11
tRF#27-M26RRNLNK8J	CGGGAGGCCCGGGTTCGATTCCCGGCC	i-tRF	0	0	0	0	0	0	0	0	23	0	21	0	0	0	0	0	0	0	0	0
tRF#20-SL73VFVI	GTATAGTGGTTAGCATAGCT	i-tRF	23	0	0	21	0	0	0	0	0	0	0	0	0	0	0	0	0	0	0	0
tRF#20-QWU1O078	GCTGTTAACCGAAAGGTTGG	i-tRF	0	0	14	0	0	0	11	0	0	0	0	0	0	0	0	0	0	0	0	19
tRF#24-YJIHFKVHI7	TTAGCATGCGAGAGGTAGCGGGAT	i-tRF	0	0	14	20	0	0	10	0	0	0	0	0	0	0	0	0	0	0	0	0
tRF#23-3K76IR3DDY	CCGGGGTTCAATTCCCCGACGGG	i-tRF	44	0	0	0	0	0	0	0	0	0	0	0	0	0	0	0	0	0	0	0
tRF#21-9IJVNLSRB	TGGCTCATGCCTGTAGTCCCA	3_U_tRF	44	0	0	0	0	0	0	0	0	0	0	0	0	0	0	0	0	0	0	0
tRF#20-87R8WP9I	TCCCTGGTGGTCTAGTGGCT	5_tRF	23	0	0	0	0	0	0	0	0	0	21	0	0	0	0	0	0	0	0	0
tRF#21-8PW7WK6W0	TCCAGTCTCTTCGGGGGCGTG	i-tRF	0	0	0	0	0	0	0	0	0	0	0	43.001	0	0	0	0	0	0	0	0
tRF#24-9P9NH57S15	TGTAGTGGTTATCACGTTCGCCTC	i-tRF	30	0	0	0	0	0	0	0	0	0	0	0	0	0	0	0	0	13	0	0
tRF#37-QK11M3WE8SPOX52	GCGGGAGGCCCGGGTTCGATTCCCGGCCAATGCACCA	3_tRNA_halve	0	0	0	0	0	0	0	0	0	0	0	0	0	0	0	10	0	21	12	0
tRF#27-789LV47PJP3	GTTGGTGGTATAGTGGTTAGCATAGCT	5_tRF	0	0	0	32	0	0	11	0	0	0	0	0	0	0	0	0	0	0	0	0
tRF#27-V4VH7Q2QW15	TAGTGTAGCGGTTATCACATTCGCCTC	i-tRF	25	0	0	0	0	0	0	0	0	0	0	0	0	0	0	0	0	0	18	0
tRF#31-4WVLV470VR31E	CTCGTTAGTATAGTGGTGAGTATCCCCGCCT	5_tRF	15	0	0	0	0	0	0	0	0	0	0	0	0	0	0	0	0	0	28	0
tRF#21-6YYDLBRY0	GGCTGTTAACCGAAAGGTTGG	i-tRF	0	0	0	0	0	0	0	0	0	0	0	0	0	0	0	0	0	14	10	19
tRF#28-RDWXHR13M80E	GGGACTCTTAATCCCAGGGTCGTGGGTT	i-tRF	0	0	0	18	0	0	0	0	0	25	0	0	0	0	0	0	0	0	0	0
tRF#33-79MP909NH57SD3	GTTTCCGTAGTGGAGTGGTTATCACGTTCGCCT	5_tRF	43	0	0	0	0	0	0	0	0	0	0	0	0	0	0	0	0	0	0	0
tRF#20-BSFQK04Z	AACCGAGCATCCAAGCTCTT	3_U_tRF	0	0	0	0	0	0	0	0	0	0	28	0	0	0	0	0	0	0	0	15
tRF#23-PYXIZW3Z0Q	GCCTGTGACTTTTGTCCTTTTTT	3_U_tRF	0	0	0	0	0	0	0	0	0	0	0	0	0	0	0	0	0	11	32	0
tRF#20-SJ83RPF8	GTAGCTCAGTGGTAGAGCGG	i-tRF	0	0	0	0	0	0	0	0	0	18	0	25	0	0	0	0	0	0	0	0
tRF#33-R9JP9PMNH5SYDQ	GGTTCCATAGTGTAGCGGTTATCACGTCTGCTT	5_tRF	43	0	0	0	0	0	0	0	0	0	0	0	0	0	0	0	0	0	0	0
tRF#27-R79K3BEE4OJ	GGTCTTGGGGCCGAAACGATCTCAACC	5_U_tRF	0	0	0	13	0	30	0	0	0	0	0	0	0	0	0	0	0	0	0	0
tRF#20-V47PVR31	TAGTGGTTAGTATCCCCGCC	i-tRF	11	0	32	0	0	0	0	0	0	0	0	0	0	0	0	0	0	0	0	0
tRF#20-37QQM0ZZ	CCTCTGCTATCGGAGTTTTT	3_U_tRF	0	13	0	0	18	0	0	0	0	0	0	0	0	0	0	0	0	0	12	0
tRF#26-MBQ4NKKQBRB	CGGAAGCGTGCTGGGCCCATAACCCA	i-tRF	0	0	11.997	0	0	0	0	0	0	0	10.998	19.998	0	0	0	0	0	0	0	0
tRF#26-1W18YMENL7D	AGTGTAGTGGTTATCACGTTCGCCTC	i-tRF	42	0	0	0	0	0	0	0	0	0	0	0	0	0	0	0	0	0	0	0
tRF#18-7383RP7	GTGGTTCAGTGGTAGAAT	i-tRF	0	0	0	42	0	0	0	0	0	0	0	0	0	0	0	0	0	0	0	0
tRF#20-MN1E8Y7Z	CGGTTAGGATTCCTGGTTTT	i-tRF	28	0	0	0	0	0	0	0	0	0	0	0	0	0	0	0	0	14	0	0
tRF#20-VKS4I7LZ	TAGGGGTATGATTCTCGCTT	i-tRF	15	0	0	0	0	0	0	0	0	0	0	0	0	0	0	0	0	0	27	0
tRF#25-RYM3W087K2	GGTTGCGGGTTCGAGTCCC-TCCAGA	i-tRF	0	0	0	0	0	0	0	27	15	0	0	0	0	0	0	0	0	0	0	0
tRF#21-R3HJ83RPB	GGGGTATAGCTCAGTGGTAGA	5_tRF	31.003	0	0	0	0	0	0	0	0	0	0	0	0	0	0	0	0	0	0	10.003
tRF#21-3JVIJMRPB	CCGGCTAGCTCAGTCGGTAGA	5_tRF	0	0	0	0	0	0	0	0	0	0	0	0	0	0	0	0	0	25.002	0	16.002
tRF#22-MEF91SS2M	CGGATAGCTCAGTCGGTAGAGC	5_tRF	0	0	0	19.002	0	0	0	0	0	0	0	0	0	22	0	0	0	0	0	0
tRF#27-389MV47P594	CCTGGTGGTCTAGTGGTTAGGATTCGG	5_tRF	0	0	0	0	0	0	0	0	0	0	0	0	0	11	0	19	0	11	0	0
tRF#21-V47Q2WNIE	TAGTGGTTATCACGTCTGCTT	i-tRF	41	0	0	0	0	0	0	0	0	0	0	0	0	0	0	0	0	0	0	0
tRF#28-RUSMKVNMEHDX	GGTGAGTATCCCCGCCTGTCACGCGGGA	i-tRF	0	0	14	0	27	0	0	0	0	0	0	0	0	0	0	0	0	0	0	0
tRF#32-ZH0SR9593KMH2	TTGCGACCCGGGTTCGATTCCCGGGCGGCGCA	3_tRF	0	0	0	0	0	0	0	0	18	0	10	0	0	0	0	13	0	0	0	0
tRF#26-94V4SMIFFND	TGGTGTAGTGGTATCATGCAAGATTC	i-tRF	0	0	14	0	0	14	0	0	0	0	0	0	0	0	0	0	0	0	0	13
tRF#20-536KZF70	GAGGTGGAGGTTGCAGTGAG	5_U_tRF	0	0	0	0	0	29	0	0	0	0	0	0	0	0	0	0	0	0	12	0
tRF#22-4E6L1F8J3	CTAATGGATAAGGCATCAGCCT	i-tRF	29	0	0	0	0	0	0	0	0	0	0	0	0	0	0	0	0	12	0	0
tRF#26-V47P596VW6D	TAGTGGTTAGGATTCGGCGCTCTCAC	i-tRF	0	0	14	0	0	0	10	0	0	0	0	0	0	0	0	0	0	0	0	17
tRF#44-SL735L8RPY8HM2OSIZ	GTATAGTGGTGAGTATCCCCGCCTGTCACGCGGGAGACCGGGGT	i-tRF	0	0	0	0	0	0	0	0	0	41	0	0	0	0	0	0	0	0	0	0
tRF#23-MXSL73VL0J	CGTTAGTATAGTGGTTAGTATCC	5_tRF	0	0	0	10	0	31	0	0	0	0	0	0	0	0	0	0	0	0	0	0
tRF#20-SJ83RPF5	GTAGCTCAGTGGTAGAGCAC	i-tRF	0	0	0	0	0	0	0	17	24	0	0	0	0	0	0	0	0	0	0	0
tRF#21-MJJ2ZBEZE	CGGGCCAGGATTGAAACTTTT	3_U_tRF	19	10	12	0	0	0	0	0	0	0	0	0	0	0	0	0	0	0	0	0
tRF#50-QNR8VP9LFQFY392J1Y0S	GCGTTGGTGGTATAGTGGTAAGCATAGCTGCCTTCCAAGCAGTTGACCCG	5_tRF	0	0	0	17	0	0	11	0	0	0	0	0	0	0	0	13	0	0	0	0
tRF#20-V4SMIFFN	TAGTGGTATCATGCAAGATT	i-tRF	23	0	0	0	0	0	0	0	0	0	0	0	0	0	0	0	0	18	0	0
tRF#29-73S3RX84YVH2	GTGGTGTAGTGGTTATCATGTTCGCCTCA	i-tRF	41	0	0	0	0	0	0	0	0	0	0	0	0	0	0	0	0	0	0	0
tRF#23-R9J89O9N9	GGTTCCATGGTGTAATGGTTAGC	5_tRF	0	0	29.001	0	0	0	0	0	0	0	0	0	0	0	0	0	0	11.998	0	0
tRF#16-9MV47P0	TGGTCTAGTGGTTAGG	i-tRF	0	0	30.996	0	0	0	0	0	0	0	0	0	0	0	0	0	0	0	0	9.999
tRF#20-RQ18YJHJ	GGTATAGTGGTTAGCATAGC	i-tRF	18	0	0	22	0	0	0	0	0	0	0	0	0	0	0	0	0	0	0	0
tRF#21-79MP9PMNB	GTTTCCGTAGTGTAGCGGTTA	5_tRF	25	0	0	15	0	0	0	0	0	0	0	0	0	0	0	0	0	0	0	0
tRF#25-VIJMRPFQRD	TAGCTCAGTCGGTAGAGCATGGGAC	i-tRF	0	0	27	0	0	0	13	0	0	0	0	0	0	0	0	0	0	0	0	0
tRF#36-86J8WPMN1E8Y7ZD	TCCCACATGGTCTAGCGGTTAGGATTCCTGGTTTTC	5_tRNA_halve	40	0	0	0	0	0	0	0	0	0	0	0	0	0	0	0	0	0	0	0
tRF#25-OSRN2NKSEK	GACCGGGGTTCAATTCCCCGACGGG	i-tRF	40	0	0	0	0	0	0	0	0	0	0	0	0	0	0	0	0	0	0	0
tRF#20-6S1H68H5	GGCCGAGGCGGGCGGATCAC	3_U_tRF	0	0	0	11	29	0	0	0	0	0	0	0	0	0	0	0	0	0	0	0
tRF#20-SJ83ML5F	GTAGCTCAGTCGGTAGAGCA	i-tRF	0	0	0	0	0	0	0	29	11	0	0	0	0	0	0	0	0	0	0	0
tRF#20-8SOUP7JZ	TCCCGGACGAGCCCTCATTT	3_U_tRF	0	0	0	40	0	0	0	0	0	0	0	0	0	0	0	0	0	0	0	0
tRF#30-RXQ678Y2Q47I	GGTTAGCTCAGTTGGTTAGAGCGTGGTGCT	5_tRF	39.996	0	0	0	0	0	0	0	0	0	0	0	0	0	0	0	0	0	0	0
tRF#26-WFS9KY5J7KE	TCGCAGTCTCCCCTGGAGGCGTGGGT	i-tRF	0	0	0	0	0	0	0	0	0	27.999	0	11.997	0	0	0	0	0	0	0	0
tRF#33-9LON4VN1EH6KDJ	TGGTAGAATTCTCGCCTGCCACGCGGGAGGCCC	i-tRF	0	0	15	12	0	0	12	0	0	0	0	0	0	0	0	0	0	0	0	0
tRF#20-I2UKJYP9	ATGGATAAGGCATTGGCCTC	i-tRF	0	0	0	0	26	0	0	0	0	0	0	0	0	0	0	0	0	0	0	13
tRF#27-V0J8O9YEKP4	TAGAGCATGGGACTCTTAATCCCAGGG	i-tRF	0	0	0	21	0	0	0	0	0	0	0	0	0	0	0	0	0	0	0	18
tRF#28-MEF91SS2PMX	CGGATAGCTCAGTCGGTAGAGCATCAGA	5_tRF	0	0	28.002	10.998	0	0	0	0	0	0	0	0	0	0	0	0	0	0	0	0
tRF#21-8FMK2OUNE	TCACACGGGGCACAATAATTT	3_U_tRF	15	0	10	14	0	0	0	0	0	0	0	0	0	0	0	0	0	0	0	0
tRF#27-MIF91SS2P4H	CGGCTAGCTCAGTCGGTAGAGCATGAG	5_tRF	0	0	0	0	0	0	0	13.998	0	25.002	0	0	0	0	0	0	0	0	0	0
tRF#32-3JH92EJ1OWZIQ	CCGGCATCTCCAAATCAGCCGACGTTTGCTTT	3_U_tRF	0	0	0	0	0	0	0	0	0	0	0	0	0	0	0	20	0	0	19	0
tRF#20-9DH48V7K	TGGACATATGTCCGCGTGGG	i-tRF	0	0	12	0	0	0	0	0	0	0	0	0	0	0	0	0	0	0	0	27
tRF#24-6J8P9H2M2E	GGAGCTCCAGTGGCGCAATCGGTT	5_U_tRF	39	0	0	0	0	0	0	0	0	0	0	0	0	0	0	0	0	0	0	0
tRF#21-SLQ673FJB	GTATAGCTCAGTGGTAGAGCA	5_tRF	11	0	0	0	0	0	0	28	0	0	0	0	0	0	0	0	0	0	0	0
tRF#22-6XQ6S8V02	GGCTAGCTCAGTCGGTAGAGCA	5_tRF	0	0	16.002	0	0	0	0	0	11.997	10.998	0	0	0	0	0	0	0	0	0	0
tRF#25-18LPMBQ4NK	AGTGGCGCAGCGGAAGCGTGCTGGG	i-tRF	24.003	0	0	0	0	0	0	0	0	0	0	0	0	0	0	0	0	0	14.004	0
tRF#30-V47P596VW631	TAGTGGTTAGGATTCGGCGCTCTCACCGCC	i-tRF	0	0	38	0	0	0	0	0	0	0	0	0	0	0	0	0	0	0	0	0
tRF#21-S3RX8HYVD	GTAGTGGTTATCACGTTCGCC	i-tRF	25	0	0	0	0	0	0	0	0	0	0	0	0	0	0	0	0	0	0	13
tRF#26-DFSP5830MME	AAGCAGTCAGGATGGCCGAGCGGTCT	5_U_tRF	27	0	0	0	0	0	0	0	0	0	0	0	0	0	0	0	0	11	0	0
tRF#24-QOUHK0SVIZ	GCTAATAACGCCAAGGTCGCGGGT	i-tRF	0	0	14	0	0	0	14	0	0	0	0	0	0	0	0	0	0	0	0	10
tRF#32-K5I34JRX6N38Q	CCCACATGGTCTAGCGGTTAGGATTCCTGGTT	5_tRF	24	0	0	0	0	0	0	0	0	0	0	0	0	14	0	0	0	0	0	0
tRF#31-86V8WPMN1E8Y0	TCCCATATGGTCTAGCGGTTAGGATTCCTGG	5_tRF	16	0	0	10	0	0	0	0	0	0	0	0	0	0	0	0	0	0	0	12
tRF#21-R0SJ7JL30	GGGAGGTAGCGTGGCCGAGTG	5_U_tRF	0	0	0	0	0	38	0	0	0	0	0	0	0	0	0	0	0	0	0	0
tRF#22-ODKQ4XNOF	GAAACCCCATCTCTACTTAAAA	5_U_tRF	38	0	0	0	0	0	0	0	0	0	0	0	0	0	0	0	0	0	0	0
tRF#27-Y3H3RUSMKV3	TTAGTATAGTGGTGAGTATCCCCGCCT	i-tRF	19	0	0	0	0	0	0	0	0	0	0	0	0	0	0	0	0	0	19	0
tRF#29-M2OSRNLNKSE4	CGGGAGACCGGGGTTCGATTCCCCGACGG	i-tRF	13	0	0	0	0	0	0	0	0	0	0	0	0	0	0	25	0	0	0	0
tRF#24-J7KB8JLHKP	CATCTCCAAATCAGCCGACGTTTG	3_U_tRF	0	0	0	18	0	0	0	0	0	0	0	0	0	0	0	0	0	0	20	0
tRF#31-8D4N4OEZB46O0	TCAACCTATTCTCAAACTTTAAATGGGCAAG	5_U_tRF	0	0	0	26	12	0	0	0	0	0	0	0	0	0	0	0	0	0	0	0
tRF#24-5DMKYUYR1R	GAGACCGGGGTTCGATTCCCCGAC	i-tRF	24	0	0	0	0	0	0	0	0	0	0	0	0	0	0	0	0	14	0	0
tRF#35-RKVP4P9L5FZUNF	GGGGGTATAGCTCAGTGGTAGAGCATTTGACTGCA	5_tRNA_halve	27	0	0	11	0	0	0	0	0	0	0	0	0	0	0	0	0	0	0	0
tRF#31-U9XW983FPD48E	TACTCTGCGTTGTGGCCGCAGCAACCTCGGT	i-tRF	0	0	0	0	0	0	0	0	0	16.002	0	21.996	0	0	0	0	0	0	0	0
tRF#42-JY7383RPD9W1X6L8L	CATTGGTGGTTCAGTGGTAGAATTCTCGCCTGCCACGCGGGA	5_tRF	0	0	0	0	0	0	0	0	0	12.999	24.003	0	0	0	0	0	0	0	0	0
tRF#25-7479MP9P9N	GTGTGGTTTCCGTAGTGTAGTGGTT	5_U_tRF	16	10	11	0	0	0	0	0	0	0	0	0	0	0	0	0	0	0	0	0
tRF#18-VBY9PYD2	TAGAATTCTCGCCTGCCA	i-tRF	0	0	0	0	0	0	0	0	0	0	0	0	0	0	0	0	0	0	0	37
tRF#25-1W188MENL7	AGTGTAGTGGTCATCACGTTCGCCT	i-tRF	37	0	0	0	0	0	0	0	0	0	0	0	0	0	0	0	0	0	0	0
tRF#21-R3YSV4V40	GGGGTTTCCGTAGTGTAGTGG	5_U_tRF	0	0	0	0	0	0	0	0	37	0	0	0	0	0	0	0	0	0	0	0
tRF#35-3SY3H3RUSMKVNM	CCTCGTTAGTATAGTGGTGAGTATCCCCGCCTGTC	5_tRNA_halve	0	0	0	0	0	0	0	0	0	0	0	0	0	0	0	0	0	37	0	0
[truncated: 2,222 more rows]
