# Supplementary material for: Shedding Light on tRNA-Derived Fragment Repertoire in Facs Blood Cells
Source: Preprints.org preprint supplement (doi:10.20944/preprints202409.0477.v1), 2024-09-05
Supplement: Supplementary file 3 [file control cells.xlsx]

## Sheet: Лист1
			lym	lym	lym	lym	mon	mon	mon	mon	mon	er	er	er	er	er	eos	eos	bas	bas	ne	ne	ne	ne	ne	ne
tRF_ID	seq	Type	don1	don2	don3	don4	don2	don3	don4	don5	don6	don1	don2	don3	don4	don5	don3	don4	don3	don4	don1	don2	don3	don4	don5	don6
tRF#33-87R8WP9N1EWJDW	TCCCTGGTGGTCTAGTGGTTAGGATTCGGCGCT	5_tRF	15640	12392	6312	3378	0	0	0	0	0	3921	9639	2324	4010	6313	301071	74225	202452	96461	669149	136231	59247	25081	20919	4156
tRF#33-79MP9P9NH57SD3	GTTTCCGTAGTGTAGTGGTTATCACGTTCGCCT	5_tRF	3344	1793	992	813	6288	2537	4854	9196	5359	317	492	460	625	924	364178	185943	130482	57513	123641	31289	22767	10759	9548	2205
tRF#34-87R8WP9N1EWJI5	TCCCTGGTGGTCTAGTGGTTAGGATTCGGCGCTC	5_tRNA_halve	7265	7290	3960	1503	0	0	0	0	0	803	1452	388	651	981	164660	48125	293571	66549	26861	62379	52171	14978	14870	2955
tRF#37-87R8WP9N1EWJQ72	TCCCTGGTGGTCTAGTGGTTAGGATTCGGCGCTCTCA	5_tRNA_halve	10730	1316	1611	918	10995	5289	6786	16501	7358	267	444	149	304	330	266769	98069	51477	13345	2104	16040	27025	9736	14571	2756
tRF#35-79MP9P9NH57S36	GTTTCCGTAGTGTAGTGGTTATCACGTTCGCCTCA	5_tRNA_halve	3845.01	774	223.002	342	3717.99	1663.99	3470.01	5225.99	2267	196.002	249.003	212.004	389.997	360	212416	158588	63247	20651	18057	6550.99	5291	5825.01	6827.98	1756
tRF#35-87R8WP9N1EWJQ7	TCCCTGGTGGTCTAGTGGTTAGGATTCGGCGCTCT	5_tRNA_halve	2057	2003	1308	925	0	0	0	0	0	200	445	157	246	352	165291	72787	92105	13807	4248	23493	25984	7630	5948	1859
tRF#32-87R8WP9N1EWJM	TCCCTGGTGGTCTAGTGGTTAGGATTCGGCGC	5_tRF	4211	1706	568	745	5446	1309	1848	6537	4413	281	379	216	227	417	58260	21072	11838	11168	102509	10755	2326	3030	2530	860
tRF#30-87R8WP9N1EWJ	TCCCTGGTGGTCTAGTGGTTAGGATTCGGC	5_tRF	15082	2216	281	1515	6595	2992	5534	12815	9341	269	420	261	272	368	18291	13766	6410	11532	34990	2274	1103	4181	5605	3280
tRF#20-VBY9PYKH	TAGAATTCTCGCCTGCCACG	i-tRF	252	1915	82	611	2190	5887	10274	10009	13164	847	1034	145	2169	1499	2909	16545	2760	16766	81	1562	101	13154	7791	2090
tRF#31-87R8WP9N1EWJ0	TCCCTGGTGGTCTAGTGGTTAGGATTCGGCG	5_tRF	6153	3000	399	1184	8396	2112	3982	8343	5858	252	748	457	383	664	9927	9956	4476	6359	27790	4913	1272	2099	2325	1393
tRF#23-Z87HFK8SDZ	TTTGGGTGCGAGAGGTCCCGGGT	i-tRF	4848	2489	45	1692	2462	3965	5654	6128	6951	548	613	183.998	936.998	854	4642	25419	1570	10782	1090	1613	179	11929	9261	7009
tRF#22-WE8SPOX52	TCGATTCCCGGCCAATGCACCA	3_tRF	131.002	239.998	316.002	143.998	555.996	4370	4761	4941	5142	11308	10976	2226	12415	12180	428.002	3449	513.998	5724	49	1147	42.998	4898	2608	779.998
tRF#34-79MP9P9NH57S15	GTTTCCGTAGTGTAGTGGTTATCACGTTCGCCTC	5_tRNA_halve	118.998	61.002	18	51.003	253.998	176.994	725.994	604.989	208.998	19.998	29.997	45	46.998	11.997	41944	19679	17331	2440	310.995	384.003	1163.01	511.992	358.992	261.999
tRF#31-PSQP4PW3FJIKB	GCCCGGCTAGCTCAGTCGGTAGAGCATGGGA	5_tRF	837.999	693.999	92.001	498.999	690	3810	8373	12666	10738	401.001	754.999	152.001	654	426.999	1944	14150	529.999	11718	1116	819	110.001	9093	4475	1521
tRF#32-PNR8YP9LON4V3	GCATTGGTGGTTCAGTGGTAGAATTCTCGCCT	5_tRF	275	309	111	154	620	182	308	1738	499	105	349	323	89	95	24765	22753	4305	2905	18443	2027	1516	559	520	163
tRF#32-79MP9P9NH57SJ	GTTTCCGTAGTGTAGTGGTTATCACGTTCGCC	5_tRF	1798	654	110	119	1509	1304	2705	4450	2717	91	144	65	129	129	17519	13279	4750	5687	13039	1602	718	2595	1951	547
tRF#23-79MP9P9NDD	GTTTCCGTAGTGTAGTGGTTATC	5_tRF	3265	319	15	263	663	717	1037	1037	781	126	104	45	1001	140	15263	9073	3671	8614	22158	964	158	2127	3601	1534
tRF#22-WE8S68L52	TCGATTCCCGGGCGGCGCACCA	3_tRF	201	351	125	208	1007	2985	4662	3845	4277	3184	9129	675	3612	5568	531	2226	728	3573	26	1936	41	3345	2277	821
tRF#26-87R8WP9N1EE	TCCCTGGTGGTCTAGTGGTTAGGATT	5_tRF	3118	336	26	719	623	332	530	1218	1013	60	60	26	193	76	6119	4650	3653	7842	16282	1420	385	1164	2974	1209
tRF#20-NJWHIM9Z	CTGGCTCGCGATGTCTGTTT	3_U_tRF	852	239	0	281	2092	23056	437	2802	5818	0	10	0	0	82	6338	2615	403	1814	841	24	0	150	104	48
tRF#33-79MP9P9MH57SD3	GTTTCCGTAGTGTAGTGGTCATCACGTTCGCCT	5_tRF	192	128	31	53	298	111	226	478	234	13	13	0	33	37	18399	15325	4710	2794	2435	1073	486	230	238	92
tRF#33-PW5SVP9N15WV0E	GCCGTGATCGTATAGTGGTTAGTACTCTGCGTT	5_tRF	245.007	183.996	24.003	54.999	564.003	1464	79.002	12590	4573.02	353.997	377.001	165.006	366.003	506.997	10244	6003	603	1358	6115.01	359.001	339.003	69.003	168.003	54.999
tRF#29-87R8WP9N1EJ4	TCCCTGGTGGTCTAGTGGTTAGGATTCGG	5_tRF	1773	874	167	530	3592	848	1046	4111	2281	77	133	92	95	113	4073	5183	3262	2200	9072	1747	1360	667	1245	1209
tRF#50-79MP9P9NH57S362VO0SR	GTTTCCGTAGTGTAGTGGTTATCACGTTCGCCTCACACGCGAAAGGTCCC	5_tRF	208.998	447.003	3460	1762	27	609.003	477	481.005	7803.01	278.001	359.001	126	9589	115.002	7222.01	543.996	272.997	246.996	77.004	416.997	5073	792.999	120.996	5055.99
tRF#22-ZKXU53K8N	TTGGGTGCGAGAGGTCCCGGGT	i-tRF	1522	855.998	0	561.002	915	1996	2829	3063	3534	195	235.002	109	255	199	1924	11063	671.002	4089	278.998	504	43	4184	3298	2778
tRF#37-QKF1R3WE8RO86J2	GCGGGAGACCGGGGTTCGATTCCCCGACGGGGAGCCA	3_tRNA_halve	3322.99	123.996	240.996	347.988	880.008	308.004	452.004	696.012	215.004	4542.01	1254	165	6100	1458	4993	549.996	452.004	454.008	7753	6294.01	2009	485.004	1246.01	564.996
tRF#30-RK9P4P9L5HMV	GGGGGTGTAGCTCAGTGGTAGAGCGCGTGC	5_tRF	937.998	627	60	520.002	387	1013	1647	579	1417	16.002	137.004	18	21	30	5529.01	12535	2069	9126.01	27	79.002	24	2268	2169	571.002
tRF#32-KY7343RX6NMH3	CCCTGGTGGTCTAGTGGTTAGGATTCGGCGCT	5_tRF	517	236	207	58	1126	363	361	2491	1736	239	473	97	260	293	10206	2535	3116	1309	8625	4260	1195	817	710	86
tRF#23-87R8WP9NY	TCCCTGGTGGTCTAGTGGTTAGG	5_tRF	2084	285	35	807	666	568	653	1596	1503	64	80	146	99	111	2455	4574	2199	2032	13622	2111	358	1017	1243	1329
tRF#31-FP18LPMBQ4NKD	AGCAGAGTGGCGCAGCGGAAGCGTGCTGGGC	5_tRF	954.009	289.008	15.003	132.003	509.004	350.991	689.004	1499.01	862.992	277.992	211.005	81.999	511.002	108.999	6937.99	11120	1397	2172	8180	1435.99	141.003	962.001	429.993	180
tRF#34-PNR8YP9LON4VHM	GCATTGGTGGTTCAGTGGTAGAATTCTCGCCTGC	5_tRNA_halve	111	451	50	38	786	586	1555	6488	1628	88	217	96	150	91	4641	9135	4193	4718	176	622	335	1495	1036	204
tRF#32-FP18LPMBQ4NKJ	AGCAGAGTGGCGCAGCGGAAGCGTGCTGGGCC	5_tRF	401.994	209.007	12.996	47.997	393.003	140.004	242.001	1319.99	456.003	44.001	180	0	99	97.002	4607.01	9217	4188.01	3973.99	3699.01	3130.01	298.998	1032.99	886.995	131.004
tRF#26-PW5SVP9N15E	GCCGTGATCGTATAGTGGTTAGTACT	5_tRF	331.002	124.002	11.997	57.996	98.001	314.001	104.004	729.999	448.002	322.002	475.002	167.004	1122	3245	8123.99	1478	282.996	1872	12414	54	10.998	110.997	198	44.001
tRF#26-9MV47P596VE	TGGTCTAGTGGTTAGGATTCGGCGCT	i-tRF	201	142	56	45	673	237	305	1469	964	324	360	65	291	292	7071	2222	2746	1691	6499	3214	445	553	535	173
tRF#27-M3WE8SSP6D2	CGGGTTCGATTCCCGGTCAGGGAACCA	3_tRF	1066.01	325.998	20.997	195.993	1655	1258	1106	1582	2049	645.003	241.996	36.999	665.001	319.995	2048	1697.99	2089	4252	24.003	1687.99	144	1308	4281.99	1119
tRF#36-87R8WP9N1EWJQ7D	TCCCTGGTGGTCTAGTGGTTAGGATTCGGCGCTCTC	5_tRNA_halve	27	0	30	12	193	72	168	511	136	0	21	0	0	0	18566	6534	2051	197	105	146	447	143	51	46
tRF#20-SBKKRSL3	GTAAACCAGGGGTCGCGAGT	i-tRF	657	575	19	98	301	1067	1437	1165	1139	12	30	0	33	35	1149	6988	638	4252	192	145	50	4171	2945	1697
tRF#33-PNR8YP9LON4VDP	GCATTGGTGGTTCAGTGGTAGAATTCTCGCCTG	5_tRNA_halve	326	2149	279	51	872	343	1170	3042	1381	324	752	161	399	500	1636	2042	4765	4699	93	500	252	1337	965	270
tRF#39-EH623K7SIR3DR2I2	ACGCGGGAGACCGGGGTTCGATTCCCCGACGGGGAGCCA	3_tRNA_halve	128.004	167.004	165	70.008	510.996	237	555	570	143.004	42.996	58.008	39	38.004	36	2185.99	390	1192.99	96.996	13733	3447.01	2934	370.008	347.004	125.004
tRF#22-PNR8YP9LL	GCATTGGTGGTTCAGTGGTAGA	5_tRF	1959	202	39	679	1127	714	819	1446	1429	227	1353	1627	268	335	1247	1730	524	1403	6921	579	64	1199	479	495
tRF#22-735L8RPY5	GTGGTGAGTATCCCCGCCTGTC	i-tRF	556	182	0	69	393	183	424	943	435	83	44	0	94	45	3846	7648	4433	2318	261	2187	151	437	842	143
tRF#34-79MP9P9NH57S1O	GTTTCCGTAGTGTAGTGGTTATCACGTTCGCCTA	5_tRNA_halve	80.997	10.003	0	10.003	96.005	85.001	114.002	179.004	101.003	15.001	16.002	0	24.997	75.999	10630	4370.96	3340.01	1319.02	3630.01	848.995	284.004	210	213.99	61.005
tRF#36-PNR8YP9LON4VN1B	GCATTGGTGGTTCAGTGGTAGAATTCTCGCCTGCCA	5_tRNA_halve	1167	479	156	625	701	557	1311	3928	1104	111	831	685	45	47	3203	5270	1402	837	124	405	468	1062	381	259
tRF#35-R9JP9P9NH5SYNX	GGTTCCATAGTGTAGTGGTTATCACGTCTGCTTTA	5_tRNA_halve	105	128	38	26	261	138	237	354	156	0	11	23	13	12	5803	4738	1790	1339	6276	1432	888	329	260	51
tRF#32-PS5P4PW3FJHP1	GCCCGGATAGCTCAGTCGGTAGAGCATCAGAC	5_tRF	343.002	390	34.002	48	838.002	723	267	5965.99	1715	39	36	15	37.002	88.998	1420	2985	223.998	890.004	5771	1374	55.002	301.998	193.998	84
tRF#37-897PVP941QKS3W2	TCCTCGTTAGTATAGTGGTGAGTATCCCCGCCTGTCA	5_tRNA_halve	1223	260	87	61	355	188	347	601	227	44	35	0	30	18	6115	3587	3780	1758	341	1381	1979	553	702	151
tRF#36-M2OSRNLNKSEK51B	CGGGAGACCGGGGTTCGATTCCCCGACGGGGAGCCA	3_tRNA_halve	993	53.004	105	198.996	348.996	129	264.996	443.004	97.008	2885	807	177	3575	650.004	1891.99	251.004	254.004	198.996	3237	4445.99	1018	236.004	498.996	318.996
tRF#21-PNR8YP9L0	GCATTGGTGGTTCAGTGGTAG	5_tRF	417	325	14	158	421	2358	2145	3181	2989	47	241	219	90	141	668	2079	341	2081	882	190	29	2126	1307	596
tRF#35-79MP9PMNH5IS36	GTTTCCGTAGTGTAGCGGTTATCACATTCGCCTCA	5_tRNA_halve	167	111	20	53	273	132	212	394	178	26	11	0	45	20	8806	6698	3051	962	706	268	187	159	140	69
tRF#33-KY7343RX6NMHD5	CCCTGGTGGTCTAGTGGTTAGGATTCGGCGCTC	5_tRNA_halve	220	91	103	25	677	460	401	2763	1729	20	59	44	36	62	4803	1611	3731	828	331	1659	1131	412	389	62
tRF#25-3K7SIR3DR2	CCGGGGTTCGATTCCCCGACGGGGA	3_tRF	1433.99	120.004	0	286	723	69	53.004	126.004	63.996	2447	677.008	190.004	5122.99	707.996	1608	806	456	482	3177.99	1995	126.996	196.004	222.004	181.004
tRF#37-79MP9P9NH57S362	GTTTCCGTAGTGTAGTGGTTATCACGTTCGCCTCACA	5_tRNA_halve	698.994	151.002	54.999	51.003	595.998	566.001	1040.99	1583.99	751.995	20.997	50.004	0	85.005	16.002	5701.98	4559	1348	644.004	210.996	351	479.997	953.001	1086	220.005
tRF#32-34HWH3RXSINHQ	CCGTGATCGTATAGTGGTTAGTACTCTGCGTT	5_tRF	52.002	140.004	34.002	36.999	288	484.002	77.004	6874	2764	26.001	26.001	0	26.001	72	3184	2019	491.994	358.002	2906.99	252	417.996	79.002	66.996	45.999
tRF#20-Q1Q89P9L	GCGCCGCTGGTGTAGTGGTA	5_tRF	2866	215	0	194	302	230	270	339	165	68	32	0	134	99	2552	4670	1128	2978	899	490	60	549	1564	684
tRF#28-3K7SIR3DR2DV	CCGGGGTTCGATTCCCCGACGGGGAGCC	3_tRF	795.996	75.996	21	165.996	592.992	125.004	69	274.992	98.004	1336.01	126	39.996	1983	667.992	1930	331.008	520.992	165	4239	5733	438	131.004	135.996	57.996
tRF#31-79MP9P9NH57SD	GTTTCCGTAGTGTAGTGGTTATCACGTTCGC	5_tRF	893	206	20	141	412	628	1443	1492	1242	89	159	86	73	73	3085	2246	961	1976	1178	266	77	1528	1050	352
tRF#20-18YKISQI	AGTGGTTAGGATTCGGCGCT	i-tRF	183	144	18	42	393	392	414	1347	1396	95	137	48	122	93	2322	1020	2253	1480	4147	1768	161	426	602	157
tRF#28-MIF91SS2P4DX	CGGCTAGCTCAGTCGGTAGAGCATGGGA	5_tRF	129.999	78	0	32.001	90.999	702.999	2605	2510	2733	11.001	11.001	0	48	21.999	528	3213	249.999	2603	35.001	69	17.001	1929	798.999	599.001
tRF#30-PNR8YP9LON4V	GCATTGGTGGTTCAGTGGTAGAATTCTCGC	5_tRF	703	537	113	577	563	500	682	1136	849	729	2094	2106	544	839	744	949	353	884	1424	396	61	924	557	316
tRF#38-L85DMKYUYRLHR0D2	CGCGGGAGACCGGGGTTCGATTCCCCGACGGGGAGCCA	3_tRNA_halve	383.004	60.996	343.008	330	150.996	177	559.008	718.992	164.004	291	87.996	14.004	386.004	88.008	730.008	98.988	301.992	115.008	1265	7363.98	3415	375.996	510	583.008
tRF#27-87R8WP9N1E5	TCCCTGGTGGTCTAGTGGTTAGGATTC	5_tRF	1004	111	11	169	205	140	135	321	157	29	44	27	86	55	2855	1820	1765	3120	3344	514	88	474	1153	423
tRF#33-79MP9PMNH5ISD3	GTTTCCGTAGTGTAGCGGTTATCACATTCGCCT	5_tRF	44	86	28	51	293	113	182	309	157	12	17	0	14	28	5315	2139	2435	1404	3945	606	237	193	122	36
tRF#29-K87SIRMM12E2	CCCGGGTTCGATTCCCGGTCAGGGAACCA	3_tRF	921.996	165.006	10.998	175.995	729.999	709.002	582.003	1014	846.999	452.997	152.001	30.996	424.008	233.001	1024	1076.99	1083	2523	0	1369	102.996	857.997	2513	639
tRF#25-R95933JKB6	GGTTCGATTCCCGGTCAGGGAACCA	3_tRF	895.995	66.996	14.004	156.006	234	594.999	738	1105	983.997	328.005	78.003	10.998	439.002	90.999	1340	1287	1045	3481	15.003	1428	63	714.996	2007	460.008
tRF#28-897PVP9N1QDJ	TCCTCGTTAGTATAGTGGTTAGTATCCC	5_tRF	412	118	214	354	1022	410	140	289	319	535	1133	3651	342	891	1476	427	1217	1675	501	471	123	751	901	148
tRF#28-PW5SVP9N1503	GCCGTGATCGTATAGTGGTTAGTACTCT	5_tRF	191.997	101.997	0	45	658.998	800.001	358.002	2715.98	1366	128.997	239.004	108	300.996	862.002	3818.01	929.997	165.996	960.003	3128	30.996	0	54.999	128.997	23.004
tRF#21-NJWHIM9ZE	CTGGCTCGCGATGTCTGTTTT	3_U_tRF	198	63	0	60	830	8863	177	1301	2494	0	0	0	0	22	1428	447	158	615	176	17	0	35	31	10
tRF#20-PNR8YP9L	GCATTGGTGGTTCAGTGGTA	5_tRF	1294	322	18	331	2139	599	551	1025	673	106	865	1530	120	429	447	511	624	414	2654	218	0	461	235	156
tRF#26-QNR8VP9NFQB	GCGTTGGTGGTATAGTGGTTAGCATA	5_tRF	321	29	0	50	173	53	88	81	120	0	0	10	13	15	963	1063	174	599	11508	26	0	99	160	75
tRF#20-40KK5Y93	CTAAGCCAGGGATTGTGGGT	i-tRF	95	131	0	0	223	1106	841	914	1040	78	174	0	156	98	481	2366	214	1767	102	346	25	2707	1412	852
tRF#36-KY7343RX6NMH49B	CCCTGGTGGTCTAGTGGTTAGGATTCGGCGCTCTCA	5_tRNA_halve	336	19	0	0	272	217	208	465	270	12	11	14	0	0	7555	2874	671	146	12	408	715	233	451	75
tRF#28-87R8WP9N1E0K	TCCCTGGTGGTCTAGTGGTTAGGATTCG	5_tRF	846	252	59	312	886	360	378	1426	728	21	76	123	56	39	1009	1268	624	777	3378	354	218	329	471	390
tRF#26-RNLNK88KO1B	GGGTTCGATTCCCGGTCAGGGAACCA	3_tRF	608.004	78.003	24.003	159.003	359.001	676.998	713.997	1070	1092.01	213.003	92.997	56.997	300.996	109.998	784.998	984.996	783.999	2335	0	956.997	47.997	733.005	1685	445.995
tRF#29-79MP9P9NH525	GTTTCCGTAGTGTAGTGGTTATCACGTTC	5_tRF	750	77	0	58	168	136	162	454	239	42	119	0	123	26	4703	1974	470	1058	2557	90	16	145	282	139
tRF#21-WE8SPOX5D	TCGATTCCCGGCCAATGCACC	3_tRF	0	0	46.998	0	0	47.002	54.998	52.998	41.998	4380	301.002	97	6211	1853	29	22.002	10.998	52.002	0	19.002	0	75.002	36.002	10.002
tRF#23-PS5U891803	GCCCGGATGATCCTCAGTGGTCT	5_tRF	515	69	11	94	71	55	80	98	67	111	122	79	242	246	3198	3145	843	1961	585	341	87	265	720	259
tRF#34-KY7343RX6NMHH3	CCCTGGTGGTCTAGTGGTTAGGATTCGGCGCTCT	5_tRNA_halve	29	26	13	15	498	385	316	1281	693	0	15	14	0	0	4465	1883	1086	194	61	605	560	146	129	45
tRF#37-QNR8VP9NFQFY392	GCGTTGGTGGTATAGTGGTTAGCATAGCTGCCTTCCA	5_tRNA_halve	110	66	0	0	252	183	221	898	166	0	29	0	0	0	3309	5372	511	501	60	140	106	168	164	52
tRF#33-897PVP941QKSD3	TCCTCGTTAGTATAGTGGTGAGTATCCCCGCCT	5_tRF	248	60	31	35	103	102	108	1752	414	49	54	0	21	24	2535	2182	1303	1731	424	340	235	103	101	38
tRF#24-Z87HFK8S2E	TTTGGGTGCGAGAGGTCCCGGGTT	i-tRF	544	113	0	207.998	151.998	587	846.002	1216	1582	26	40	0	25	22	535.002	1359	296.998	1020	107	90	13	1096	941	1069
tRF#50-PNR8YP9LON4VN1EH6KK8	GCATTGGTGGTTCAGTGGTAGAATTCTCGCCTGCCACGCGGGAGGCCCGG	5_tRF	38.003	98	975.002	278.999	0	185.997	94.003	133	1739	128.002	290.003	101.997	4232	47.999	982.996	187.999	47.999	52.003	52.997	87.997	932.995	128.002	37.002	1015
tRF#36-897PVP941QKS3WD	TCCTCGTTAGTATAGTGGTGAGTATCCCCGCCTGTC	5_tRNA_halve	0	30	0	10	50	0	46	117	20	0	0	0	0	0	4385	1824	3499	686	34	194	426	199	100	0
tRF#30-OSRNLNKSEK51	GACCGGGGTTCGATTCCCCGACGGGGAGCC	3_tRF	505.992	41.004	30	110.004	187.992	59.004	42	274.992	39.996	399.996	60.996	15.996	444	187.992	463.008	198	111.996	84	1946	5602	614.004	51	72	72
tRF#32-RK9P4P9L5HMVQ	GGGGGTGTAGCTCAGTGGTAGAGCGCGTGCTT	5_tRF	34.998	111	0	25.002	93	49.998	52.998	153	130.998	13.002	12	0	28.998	12	3811	3725	1941	921.996	120	78	37.002	88.002	61.002	25.002
tRF#30-7EMQ18Y3E7QN	GTGATCGTATAGTGGTTAGTACTCTGCGTT	5_tRF	38.997	62.001	0	18.999	181.998	358.002	51.003	3819.01	1767	60.003	59.004	0	93.996	200.997	1476	992.997	226.998	305.001	1273	138.996	111.996	75.996	55.998	27.999
tRF#31-MUWLV47PU9XWE	CGTGATCGTATAGTGGTTAGTACTCTGCGTT	5_tRF	34.002	45	0	0	162	323.001	29.997	3521.99	1618	156.996	128.997	45	119.997	145.998	2063	1003	210.996	153.999	1159	114.003	140.004	18.999	41.004	9.999
tRF#35-897PVP941QKS3W	TCCTCGTTAGTATAGTGGTGAGTATCCCCGCCTGT	5_tRNA_halve	162	200	55	57	167	77	207	241	121	99	149	22	71	73	1712	1425	2442	1580	716	352	387	394	308	60
tRF#29-08R959KUMKEV	ACCGGGGTTCGATTCCCCGACGGGGAGCC	3_tRF	465	41.004	20.004	78	324	53.004	24.996	122.004	42	608.004	38.004	18	849	291.996	1187	165	316.992	87.996	2504	3429	258.996	44.004	63.996	44.004
tRF#29-3JVIJMRPFQIX	CCGGCTAGCTCAGTCGGTAGAGCATGGGA	5_tRF	69	77.001	0	20.001	38.001	315	1128	1109	1143	15	15.999	0	32.001	17.001	153	1992	99.999	2001	0	96.999	12.999	1609	531.999	312.999
tRF#31-PNR8YP9LON4VD	GCATTGGTGGTTCAGTGGTAGAATTCTCGCC	5_tRF	108	268	17	43	278	179	366	1834	491	89	165	124	112	105	1491	1838	243	526	1991	157	67	126	113	35
tRF#37-QKF1R38E8RO86J2	GCGGGAGACCGGGGTTCAATTCCCCGACGGGGAGCCA	3_tRNA_halve	1032	27	60	38	303	63	135	170	106	576	131	15	919	319	1936	110	134	63	2288	1207	581	75	263	71
tRF#20-R4L2RRM3	GGGTGCGAGAGGTCCCGGGT	i-tRF	234	92	0	129	240	444	544	811	842	49	53	0	59	71	352	2979	96	834	54	149	0	1139	683	689
tRF#24-87R8WP9NEX	TCCCTGGTGGTCTAGTGGTTAGGA	5_tRF	668	93	0	86	186	67	108	206	214	12	16	22	29	22	575	1189	396	510	4873	315	108	123	210	299
tRF#30-FP18LPMBQ4NK	AGCAGAGTGGCGCAGCGGAAGCGTGCTGGG	5_tRF	188.001	83.997	0	19.998	156.996	104.994	268.992	457.992	264.996	169.002	119.997	19.998	355.995	86.004	795.996	4070	349.002	589.005	1111.01	371.997	43.002	208.008	100.008	105.003
tRF#21-V47P596VE	TAGTGGTTAGGATTCGGCGCT	i-tRF	159	137	10	15	165	640	769	1536	2110	22	0	0	24	28	525	322	400	577	1443	360	23	225	277	127
tRF#23-79MP9P9MDD	GTTTCCGTAGTGTAGTGGTCATC	5_tRF	475	75	0	39	113	179	171	182	140	0	0	0	148	18	2316	1575	544	1302	1876	138	12	116	341	102
tRF#28-1IK34ZMKQ4DZ	AGGCTCCAGTCTCTTCGGGGGCGTGGGT	i-tRF	315	254.996	51.002	161	116.004	117.999	203.994	105	88.998	1128	1245	437.997	1787	808.99	555.002	963.998	243.999	304.997	134.001	304.997	0	181.006	268.002	68.999
tRF#27-897PVP9N1QJ	TCCTCGTTAGTATAGTGGTTAGTATCC	5_tRF	330	75	77	206	652	303	74	166	243	173	393	1378	143	272	897	303	994	1183	282	355	41	457	708	120
tRF#26-RK9P4P9L5HE	GGGGGTGTAGCTCAGTGGTAGAGCGT	5_tRF	230	182	0	182	44	513	799	461	1075	0	33	0	0	13	968	2322	279	1187	31	17	0	686	435	182
tRF#30-PW5SVP9N15WV	GCCGTGATCGTATAGTGGTTAGTACTCTGC	5_tRF	153.999	84.996	11.997	28.998	491.004	596.997	299.997	1319	944.001	352.998	442.998	61.002	470.997	682.002	1130.99	461.997	60.003	725.004	941.994	19.998	0	109.998	128.997	24.003
tRF#33-R9JP9P9NH5SYDQ	GGTTCCATAGTGTAGTGGTTATCACGTCTGCTT	5_tRF	30	52	0	28	139	33	33	68	27	0	0	0	0	0	2737	1280	228	269	3568	586	185	79	52	20
tRF#27-MIF91SS2P44	CGGCTAGCTCAGTCGGTAGAGCATGGG	5_tRF	77.001	81	0	41.001	18	261.999	804	807	1010	0	0	0	39	35.001	230.001	2860	210.999	1373	12	33	0	776.001	356.001	327.999
tRF#25-RNLNKSEK51	GGGTTCGATTCCCCGACGGGGAGCC	3_tRF	393.996	42	0	66	213.996	39.996	21.996	95.004	33.996	642	57.996	42	1079	357.996	690	174.996	261.996	102.996	2769	1975.99	81.996	42.996	54	24.996
tRF#26-SP5830MMUKD	GTCAGGATGGCCGAGCGGTCTAAGGC	5_tRF	790.002	228.015	0	74.997	222.003	140.004	294.003	423.999	178.002	0	18	0	28.998	16.002	640.998	3569	177.003	824.994	98.001	72	18	666.99	494.001	252
tRF#21-WE8RO86JD	TCGATTCCCCGACGGGGAGCC	3_tRF	93	12.996	15	14.004	56.004	21.996	12	39	15.996	1285	33	0	4414	594	84.996	59.004	48	32.004	1800	523	12	18	21	0
tRF#22-N1EH6KK8N	CTGCCACGCGGGAGGCCCGGGT	i-tRF	84	159	0	31	78	520	528	751	526	111	269	139	160	83	137	2383	56	1269	111	88	0	963	564	150
tRF#33-PS5P4PW3FJHPW	GCCCGGATAGCTCAGTCGGTAGAGCATCAGACT	5_tRF	274.002	409.998	34.998	37.998	637.002	103.002	112.998	847.002	175.998	30	40.002	19.998	19.998	34.002	1403	1535	325.002	517.002	903	1389	61.002	64.998	28.002	16.998
tRF#29-34HWH3RXSIHM	CCGTGATCGTATAGTGGTTAGTACTCTGC	5_tRF	77.004	72	25.002	14.004	207.999	503.001	993.996	1495	1064	28.998	72	21.996	105.003	99.999	567.999	527.004	164.997	991.998	411.003	32.004	16.002	701.001	389.997	233.001
tRF#20-SBJ25R93	GTAAACAGGAGATCCTGGGT	i-tRF	54	127	0	53	93	420	166	583	374	95	149	63	143	106	259	2331	78	1473	58	77	0	909	761	219
tRF#22-WE8RO86J2	TCGATTCCCCGACGGGGAGCCA	3_tRF	45.996	29.004	0	105.996	65.004	383.004	636	633	373.992	336.996	609.996	177.996	1429	598.992	98.004	486	113.004	672	0	512.004	0	303.996	517	53.004
tRF#23-897PVP94Z	TCCTCGTTAGTATAGTGGTGAGT	5_tRF	608	105	0	119	124	159	200	223	208	58	32	0	106	55	495	601	138	413	3585	123	22	247	204	180
tRF#30-PSQP4PW3FJIK	GCCCGGCTAGCTCAGTCGGTAGAGCATGGG	5_tRF	51.999	144.999	0	69.999	147	236.001	573	759	652.998	54	107.001	79.001	69.999	42	141	3380	33	584.999	26.001	30.999	0	426	249	129
tRF#28-R8WP9N1EWJDW	GGTGGTCTAGTGGTTAGGATTCGGCGCT	i-tRF	86	53	25	15	186	58	34	253	213	57	54	0	73	78	1789	484	1064	753	1192	1005	194	89	140	37
tRF#32-F1R3WE8RO86J2	AGACCGGGGTTCGATTCCCCGACGGGGAGCCA	3_tRF	51.996	12.996	20.004	285	35.004	237	438	403.992	204	21.996	36	57.996	9.996	12	141	161.004	303.996	138.996	0	3926	105	309	627.996	393
tRF#31-OSRNLNKSEK51B	GACCGGGGTTCGATTCCCCGACGGGGAGCCA	3_tRF	123.996	0	0	288.996	51.996	224.004	511.008	416.004	186	41.004	66.996	60	15.996	30.996	200.004	171.996	405.996	174.996	0	3541.99	63.996	275.004	659.004	390.996
tRF#28-3L7L73V6M9DV	CCGTAGTGTAGTGGTTATCACGTTCGCC	5_tRF	153	70	0	18	82	261	380	262	316	0	14	0	0	23	629	1561	219	1837	40	73	12	1012	694	199
tRF#36-18YKISQI45LSM1D	AGTGGTTAGGATTCGGCGCTCTCACCGCCGCGGCCC	i-tRF	112	135	30	34	44	380	733	1555	1388	0	33	0	12	0	362	460	159	592	0	55	127	572	705	245
tRF#26-08R959KUMKB	ACCGGGGTTCGATTCCCCGACGGGGA	3_tRF	524	39	9.996	139	242.008	18	9.996	78.996	24.996	852	155.004	21	1712	247	589	317	173.008	176	962	931.008	68	84	78	74.996
tRF#25-34HWH3RXSI	CCGTGATCGTATAGTGGTTAGTACT	5_tRF	81.999	29.997	0	15.003	93.996	109.998	66.996	198	162.999	88.002	93.996	27.999	399.996	587.997	2032	293.004	169.002	413.001	2486	15.003	0	54	68.004	17.001
tRF#28-3KYUYRR6RBD2	CCGGGTTCGATTCCCGGTCAGGGAACCA	3_tRF	259.002	81	0	94.995	379.998	247.005	193.005	387	415.998	275.994	41.004	15.003	213.003	55.998	435.996	437.994	555.003	1129.99	0	531	38.997	377.001	982.008	310.995
tRF#35-QNR8VP9NFQFY39	GCGTTGGTGGTATAGTGGTTAGCATAGCTGCCTTC	5_tRNA_halve	15	86	0	0	88	55	95	517	127	0	11	0	0	0	906	1276	979	1230	1501	177	82	102	120	25
tRF#27-9MV47P596V5	TGGTCTAGTGGTTAGGATTCGGCGCTC	i-tRF	45	16	0	0	309	123	145	926	341	0	13	0	0	11	1220	707	1380	440	161	738	204	174	197	65
tRF#31-F1R3WE8RO86JD	AGACCGGGGTTCGATTCCCCGACGGGGAGCC	3_tRF	114	17.004	24.996	90	78.996	38.004	24.996	192	15	151.992	15.996	0	140.004	18.996	146.004	54	95.004	0	975	4275	528.996	39	15.996	48
tRF#21-VBY9PYKHD	TAGAATTCTCGCCTGCCACGC	i-tRF	11	111	0	35	102	298	472	571	679	104	123	27	345	221	237	628	230	929	0	117	11	1140	453	178
tRF#33-5DMKYUYRLHR0D2	GAGACCGGGGTTCGATTCCCCGACGGGGAGCCA	3_tRF	51	0	21	334.008	48	301.008	378.996	359.004	219	62.004	62.004	39	20.004	33	114.996	111	240	131.004	0	2853	96	416.004	742.008	372.996
tRF#20-V47P596V	TAGTGGTTAGGATTCGGCGC	i-tRF	87	60	0	28	105	454	717	1299	1737	0	0	0	0	0	227	271	106	576	174	67	0	451	314	282
tRF#27-PW5SVP9N155	GCCGTGATCGTATAGTGGTTAGTACTC	5_tRF	100.998	37.998	0	29.997	138.996	235.998	65.997	657	359.001	54.999	126	64.998	171	477.999	1776	515.997	84.996	549	1367	0	0	29.997	56.997	11.997
tRF#31-389MV47P596VE	CCTGGTGGTCTAGTGGTTAGGATTCGGCGCT	5_tRF	149	149	81	26	204	191	221	1653	1174	23	46	15	24	31	615	116	348	267	932	363	131	54	35	0
tRF#21-JOWU1M70E	CATAATCTGAAGGTCGTGAGT	i-tRF	162	121	0	29	26	458	589	600	585	0	0	0	0	0	226	1059	131	886	46	0	0	725	600	293
tRF#31-RK9P4P9L5HMVE	GGGGGTGTAGCTCAGTGGTAGAGCGCGTGCT	5_tRF	101.004	39	0	43.002	46.998	112.002	169.998	49.998	148.002	0	0	0	0	0	873	1716	469.002	2399	13.998	0	0	139.002	148.002	28.998
tRF#22-ZK8U53K8N	TTGGGTCCGAGAGGTCCCGGGT	i-tRF	79	79	0	19	111	220	362	839	635	15	44	0	56	58	100	1630	0	485	14	76	0	819	511	339
tRF#27-7343RX6NMH3	GTGGTCTAGTGGTTAGGATTCGGCGCT	i-tRF	90	51	30	0	176	84	57	573	409	22	72	0	52	56	934	241	492	383	1274	1096	231	86	72	0
tRF#34-PW5SVP9N15WV2P	GCCGTGATCGTATAGTGGTTAGTACTCTGCGTTG	5_tRNA_halve	327.996	198.999	19.998	0	209.997	170.001	92.997	1150	453.996	411.003	1267	138.996	376.002	272.997	431.001	296.001	72	267.003	72.999	91.998	36.999	14.004	33.003	0
tRF#32-897PVP941QKSJ	TCCTCGTTAGTATAGTGGTGAGTATCCCCGCC	5_tRF	698	97	0	58	79	86	99	548	105	205	97	78	58	94	780	1164	229	427	930	116	81	133	103	106
tRF#22-NMEH623KN	CTGTCACGCGGGAGACCGGGGT	i-tRF	128	179	0	23	93	306	385	623	394	93	261	65	119	70	97	1573	50	524	34	123	0	541	379	232
tRF#27-Q1Q89P9L842	GCGCCGCTGGTGTAGTGGTATCATGCA	5_tRF	857	68	0	49	89	91	195	497	191	21	13	0	30	16	796	1374	161	852	111	89	20	230	312	135
tRF#29-QNR8VP94FQEW	GCGTTGGTGGTATAGTGGTGAGCATAGCT	5_tRF	305	185.998	28.002	98.998	672.002	433.002	580.002	1704	1190	22.002	22.002	19.998	10.998	72	230	125.998	85.998	225	31.998	0	0	86.998	45	12
tRF#25-PNR8YP9LON	GCATTGGTGGTTCAGTGGTAGAATT	5_tRF	163	79	0	101	136	89	59	176	137	85	235	187	109	205	443	224	134	246	3131	25	0	63	90	37
tRF#22-ZLB6R3LUN	TTGTAAACCAGGGGTCGCGAGT	i-tRF	180	120	0	11	46	199	336	303	319	0	0	0	0	16	300	1370	136	884	20	31	10	862	532	450
tRF#20-Z3R918VB	TTGGTGGTTCAGTGGTAGAA	5_tRF	21	39	0	13	41	271	519	503	762	0	10	31	0	14	231	641	171	969	13	27	10	913	478	348
tRF#22-WE8SP6X52	TCGATTCCCGGCCCATGCACCA	3_tRF	0	0	24	0	12	150	146	221	254	826	1127	591	997	1097	44	65	18	224	0	22	0	92	32	20
tRF#31-KY7343RX6NMHD	CCCTGGTGGTCTAGTGGTTAGGATTCGGCGC	5_tRF	157	18	16	11	240	68	57	211	219	0	44	14	0	0	2243	621	125	119	1249	338	51	56	80	16
tRF#27-SL735L8RPY5	GTATAGTGGTGAGTATCCCCGCCTGTC	i-tRF	99	11	0	0	88	26	68	150	25	12	0	0	10	0	1709	1786	818	380	47	341	40	126	167	36
tRF#18-07QSNHD2	ACCCTGCTCGCTGCGCCA	3_tRF	119	20	0	102	66	435	519	945	604	129	222	95	176	92	189	536	71	460	29	334	13	348	282	136
tRF#18-8R6Q46D2	TCCCCGGCATCTCCACCA	3_tRF	159.992	49	0	127.995	70	367.003	517.993	260.008	443.002	249.998	361.991	98.994	53.004	266.994	226.002	390.999	156.996	630	0	322.994	25.998	535.997	450.989	94.997
tRF#20-HDPORSM3	ATAACGCCAAGGTCGCGGGT	i-tRF	52	46	0	16	0	275	125	326	258	0	0	0	0	0	85	2447	35	732	0	88	0	510	701	106
tRF#21-Z3R918VBE	TTGGTGGTTCAGTGGTAGAAT	5_tRF	42	49	0	13	13	379	613	699	956	10	0	0	12	18	215	521	131	823	17	20	0	574	390	271
tRF#30-34HWH3RXSINH	CCGTGATCGTATAGTGGTTAGTACTCTGCG	5_tRF	41.004	120.996	10.998	18.999	144	183.996	324.999	809.001	489.996	46.998	30.996	27	53.001	88.002	561.996	524.997	91.998	389.997	1137	54.999	33.003	236.997	170.001	90
tRF#35-RPM830MMUKLY5X	GGTAGCGTGGCCGAGCGGTCTAAGGCGCTGGATTA	5_tRNA_halve	30	117	17	40	20	0	22	34	18	0	0	0	0	0	1472	1046	1980	671	0	115	31	36	17	0
tRF#23-ZKXU53K80E	TTGGGT-GCGAGAGGTCCCGGGTT	i-tRF	158.998	54.998	0	74.998	119	295	477	689.002	821.998	0	0	0	0	0	364.998	662.002	159	471.002	18	0	0	505.996	343	395.996
tRF#32-MXSL735L8RPY5	CGTTAGTATAGTGGTGAGTATCCCCGCCTGTC	5_tRNA_halve	93	0	0	0	32	16	12	46	20	0	0	0	0	0	1291	926	2077	596	18	182	105	108	85	0
tRF#27-FP18LPMBQ43	AGCAGAGTGGCGCAGCGGAAGCGTGCT	5_tRF	1166.99	19.998	0	18	48.996	50.004	65.007	135.999	97.002	18.999	0	0	0	0	1012	1249	244.008	664.002	258.003	48.996	0	102.996	227.997	103.005
tRF#27-7EMQ18Y3E7M	GTGATCGTATAGTGGTTAGTACTCTGC	5_tRF	24.003	18	0	0	18	347.004	835.002	935.001	798.003	9.999	21.996	20.997	36	26.001	311.004	428.004	55.998	547.002	100.998	0	9.999	533.997	297	153
tRF#29-PW5SVP9N15JP	GCCGTGATCGTATAGTGGTTAGTACTCTG	5_tRF	68.004	128.997	15.003	26.001	432.999	371.997	180.999	1693	901.008	54	55.998	24.003	78.003	141.003	342.999	386.001	24.003	299.997	254.997	0	0	16.002	0	0
tRF#32-R29P4P9L5HJVQ	GGGGATGTAGCTCAGTGGTAGAGCGCATGCTT	5_tRF	20	53.002	0	10	58	0	13	49.997	10	0	0	23	36	12	1222	2394	161.001	623.004	326.999	310	11	17	36	0
tRF#50-87R8WP9N1EWJQ72S3HPS	TCCCTGGTGGTCTAGTGGTTAGGATTCGGCGCTCTCACCGCCGCGGCCCG	5_tRF	43	60	642	423	0	62	42	78	1254	26	38	0	830	12	221	25	16	0	0	51	1271	41	0	225
tRF#22-WE8SPOL52	TCGATTCCCGGCCAACGCACCA	3_tRF	26	96	0	40	163	477	856	562	730	78	49	0	70	84	73	472	130	597	0	170	0	431	183	67
tRF#36-M2OSRN2NKSEK51B	CGGGAGACCGGGGTTCAATTCCCCGACGGGGAGCCA	3_tRNA_halve	361	12	35	26	108	27	69	119	53	359	44	0	534	148	838	32	97	21	1095	785	345	42	105	27
tRF#22-WD8S746D2	TCGACTCCCGGTGTGGGAACCA	3_tRF	39	207	11	37	237	445	733	746	476	141	215	0	379	74	31	298	67	441	0	117	0	296	202	86
tRF#35-V0J8O9YEKPRS93	TAGAGCATGGGACTCTTAATCCCAGGGTCGTGGGT	i-tRF	61	117	30	81	52	257	591	721	628	44	132	0	53	33	545	324	137	211	0	30	93	524	283	259
tRF#32-PW5SVP9N15WVN	GCCGTGATCGTATAGTGGTTAGTACTCTGCGT	5_tRF	93.996	23.004	0	12.996	46.998	63.999	0	504.999	222.003	282.996	158.004	36	137.997	60.003	1398.01	759.996	51.003	287.001	898.992	44.001	23.004	14.004	19.998	0
tRF#25-SP5830MMUK	GTCAGGATGGCCGAGCGGTCTAAGG	5_tRF	235.998	178.002	0	44.001	107.001	291.996	1203	1144	822.996	0	0	0	0	0	174.996	578.997	32.004	45	30.996	29.997	0	50.004	44.001	45
tRF#28-9MV47P596V03	TGGTCTAGTGGTTAGGATTCGGCGCTCT	i-tRF	17	20	0	0	95	77	105	512	194	0	0	0	0	0	1630	986	493	144	25	316	106	87	100	25
tRF#26-M3WE8SSP6DD	CGGGTTCGATTCCCGGTCAGGGAACC	3_tRF	295.002	39.996	0	21.996	222.003	73.998	27	111.996	174.996	210.006	0	0	630.999	147.996	423	151.992	106.002	132.003	1638	342.999	23.004	17.001	26.001	20.997
tRF#34-9N1EWJQ72S3HIJ	TGGTTAGGATTCGGCGCTCTCACCGCCGCGGCCC	i-tRF	66	93	0	21	29	205	521	1017	1171	0	14	0	0	0	71	215	76	434	0	43	39	456	262	102
tRF#31-PS5P4PW3FJHPB	GCCCGGATAGCTCAGTCGGTAGAGCATCAGA	5_tRF	163.998	96	0	25.002	176.004	306	372	844.002	457.002	12	16.998	0	12	16.002	103.002	559.998	31.002	481.998	460.002	46.998	0	367.998	211.002	67.002
tRF#30-J8O9YEKPRS93	CATGGGACTCTTAATCCCAGGGTCGTGGGT	i-tRF	227	21	0	0	185	305	229	342	465	61	127	14	127	100	616	896	36	490	47	21	0	167	293	51
tRF#30-N3R718YKISQI	CTGGTGGTCTAGTGGTTAGGATTCGGCGCT	5_tRF	125	112	50	21	129	61	55	467	316	30	40	0	48	44	836	205	417	425	850	402	73	42	56	14
tRF#22-87R8WP9NH	TCCCTGGTGGTCTAGTGGTTAG	5_tRF	222	28	0	75	57	65	89	170	159	15	16	0	21	15	345	332	447	330	1197	412	125	130	261	238
tRF#25-PW5SVP9N15	GCCGTGATCGTATAGTGGTTAGTAC	5_tRF	117.001	24.003	0	12.996	134.004	135.002	39.001	177.003	127.998	125.002	249.999	423.997	187.002	292.002	831.996	213.003	95	468.995	859.998	10	0	48	117.002	0
tRF#27-6XQ6S8V0J8L	GGCTAGCTCAGTCGGTAGAGCATGGGA	5_tRF	54.999	60	0	17.001	42	192	446.001	399.999	687	24	36.999	0	57	53.001	204	842.001	57	831.999	20.001	21.999	0	299.001	237.999	96.999
tRF#26-86J8WPMN1EE	TCCCACATGGTCTAGCGGTTAGGATT	5_tRF	292	70	0	61	84	32	45	56	42	0	0	0	0	0	569	542	273	987	1343	40	11	66	87	37
tRF#20-3ZW0HI7Z	CCTTTTCGAGATACTGTTTT	3_U_tRF	180	75	17	80	192	297	324	272	447	0	0	0	0	0	342	181	514	817	10	35	11	679	62	65
tRF#27-PNR8YP9LON3	GCATTGGTGGTTCAGTGGTAGAATTCT	5_tRF	82	59	14	79	159	317	223	1248	370	77	277	414	100	172	101	121	81	153	273	46	0	108	86	32
tRF#30-QNR8VP94FQFY	GCGTTGGTGGTATAGTGGTGAGCATAGCTG	5_tRF	222	165	64.002	64.002	141	429	525	537.996	642	0	0	0	0	15	433.998	292.998	121.002	360	16.002	19.002	0	325.998	142.998	66
tRF#50-R9JP9P9NH5SYNX2VF0S7	GGTTCCATAGTGTAGTGGTTATCACGTCTGCTTTACACGCAGAAGGTCCT	5_tRF	30	81	752	147	0	98	49	52	1065	0	30	0	11	0	825	44	30	29	0	63	838	63	13	341
tRF#29-LBLM8D4N4OEQ	CGAAACGATCTCAACCTATTCTCAAACTT	5_U_tRF	79	57	16	12	96	424	2354	361	691	0	0	0	0	0	100	30	94	37	0	22	22	32	24	0
tRF#32-5DMKYUYRLHR0J	GAGACCGGGGTTCGATTCCCCGACGGGGAGCC	3_tRF	66.996	12.996	21	54	84	14.004	0	110.004	12	92.004	15.996	0	44.004	12	131.004	50.004	33.996	20.004	581.004	2602	381.996	29.004	14.004	35.004
tRF#29-KY7343RX6N19	CCCTGGTGGTCTAGTGGTTAGGATTCGGC	5_tRF	566	35	0	22	238	137	209	416	484	0	65	16	21	12	642	445	73	127	392	78	42	125	170	71
tRF#18-BS68BFD2	AACCGGGCGGAAACACCA	3_tRF	94	26	0	10	266.032	476.992	203.024	316.016	297.008	30	29.008	0	0	18	456.016	575.008	129.024	293.008	76	162	0	438.976	308.016	180
tRF#17-Y2R79KJ	TTAGAGGTCTTGGGGCC	5_U_tRF	598	254	0	263	789	351	149	219	272	21	177	88	74	15	155	131	132	174	10	285	0	144	34	49
tRF#26-RNLNKSEK51B	GGGTTCGATTCCCCGACGGGGAGCCA	3_tRF	106.008	15.996	0	163.992	65.004	226.008	294.996	192	213.996	59.004	26.004	24	29.004	44.004	171	205.008	218.004	312.996	0	852.996	24	204.996	675.996	191.004
tRF#28-3JVIJMRPFQDY	CCGGCTAGCTCAGTCGGTAGAGCATGGG	5_tRF	32.001	74.001	0	17.001	42.999	98.001	393	372.999	450	15	0	0	23.001	21.999	47.001	1236	35.001	510	0	53.001	0	495	204.999	129
tRF#27-34HWH3RXSI3	CCGTGATCGTATAGTGGTTAGTACTCT	5_tRF	43.002	30.996	0	19.998	331.002	172.998	115.002	581.994	344.997	69.003	78.003	0	123.003	267.003	1012	208.998	15.003	181.998	585.999	0	9.999	15.003	27	0
tRF#26-6XQ6S8V0J80	GGCTAGCTCAGTCGGTAGAGCATGGG	5_tRF	32.001	33.999	0	0	36	129.999	339	348.999	494.001	12	14.001	0	33	12	95.001	1069	50.001	969	0	9.999	0	242.001	111.999	105.999
tRF#33-FP18LPMBQ4NKDJ	AGCAGAGTGGCGCAGCGGAAGCGTGCTGGGCCC	5_tRNA_halve	85.005	0	0	0	11.997	27	19.998	130.995	18	0	0	0	0	0	882.999	2229	323.001	163.998	25.002	63	16.002	40.995	46.998	15.003
tRF#21-LNK88KO1B	CGATTCCCGGTCAGGGAACCA	3_tRF	102	48	0	318	266	472	358	900	736	12	53	57	22	0	0	37	44	50	0	211	0	192	95	115
tRF#24-S3M8309N0Y	GTAGTCGTGGCCGAGTGGTTAAGG	5_tRF	198	154	0	122	184	111	140	103	119	30	30	34	36	121	890	992	131	136	169	83	0	86	152	51
tRF#23-QNR8VP9N9	GCGTTGGTGGTATAGTGGTTAGC	5_tRF	160	31	0	31	53	194	108	148	201	0	0	0	0	0	264	319	66	175	2007	18	0	140	86	59
tRF#26-RX6NMH490VD	GGTTAGGATTCGGCGCTCTCACCGCC	i-tRF	144	105	0	12	44	212	297	623	780	0	0	0	0	0	139	385	66	701	0	36	0	262	196	52
tRF#20-P4L2RPM2	GCATGCGAGAGGTAGCGGGA	i-tRF	54	25	0	10	82	278.002	375	247	320.001	48	21	24.003	30	13	149	1008	22	373.999	15	16	0	536.999	202.997	196
tRF#50-P4R8YP9LON4VN1EH6KK8	GCATGGGTGGTTCAGTGGTAGAATTCTCGCCTGCCACGCGGGAGGCCCGG	5_tRF	0	0	274	42	0	36	28	26	531	49	101	39	2223	23	266	33	12	15	14	13	127	18	0	168
tRF#36-S2I7L7P5QK11M3E	GTAGAATTCTCGCCTGCCACGCGGGAGGCCCGGGTT	i-tRF	28	499	74	196	57	244	633	803	1065	0	0	0	0	0	22	64	34	134	0	0	0	88	66	12
tRF#24-PNR8YP9LH7	GCATTGGTGGTTCAGTGGTAGAAT	5_tRF	89	35	0	19	95	240	201	428	308	31	54	102	55	102	204	223	59	279	950	31	0	225	166	113
tRF#28-PNR8YP9LOND5	GCATTGGTGGTTCAGTGGTAGAATTCTC	5_tRF	97	57	10	88	243	176	149	780	218	137	409	398	87	187	129	115	65	132	318	38	0	69	63	15
tRF#37-V47P596VW631QJJ	TAGTGGTTAGGATTCGGCGCTCTCACCGCCGCGGCCC	i-tRF	56	64	16	12	50	215	359	885	740	0	49	0	0	14	185	133	98	272	0	35	98	241	325	120
tRF#23-PW5SVP9NZ	GCCGTGATCGTATAGTGGTTAGT	5_tRF	86.004	27.999	0	18	72.999	1097	33.003	348.003	318.996	27	43.002	0	69.003	109.998	438.003	117.999	36.999	192.996	880.002	0	0	25.002	24.003	0
tRF#28-924ZDRJKW4DZ	TGGGACTCTTAATCCCAGGGTCGTGGGT	i-tRF	37	29	0	0	63	108	351	333	482	25	30	0	12	34	186	732	131	370	0	59	0	516	288	172
tRF#34-897PVP941QKS1P	TCCTCGTTAGTATAGTGGTGAGTATCCCCGCCTG	5_tRNA_halve	123	85	43	10	79	39	72	92	50	74	80	0	20	19	301	638	1004	552	125	98	55	185	85	60
tRF#30-KY7343RX6NMH	CCCTGGTGGTCTAGTGGTTAGGATTCGGCG	5_tRF	266	53	0	26	368	127	195	325	410	0	52	14	18	32	485	443	60	133	391	187	41	121	107	23
tRF#20-RUSMKVNM	GGTGAGTATCCCCGCCTGTC	i-tRF	70	15	0	12	25	55	59	140	84	19	0	0	30	33	573	1094	737	337	27	330	11	91	120	10
tRF#32-P4R8YP9LON4V3	GCATGGGTGGTTCAGTGGTAGAATTCTCGCCT	5_tRF	34	25	13	0	31	15	28	95	60	94	142	63	153	39	1303	638	120	70	675	66	92	21	54	17
tRF#16-Y2R79KD	TTAGAGGTCTTGGGGC	5_U_tRF	235	198	0	160	155	404	499	315	491	10	44	54	0	0	76	203	82	234	72	119	12	205	157	91
tRF#20-9LON4VN1	TGGTAGAATTCTCGCCTGCC	i-tRF	65	87	0	14	63	332	430	490	380	43	12	24	45	35	103	360	77	447	0	88	0	360	276	74
tRF#29-897PVP941Q1J	TCCTCGTTAGTATAGTGGTGAGTATCCCC	5_tRF	581	34	0	41	128	55	73	255	100	13	0	0	0	0	563	486	167	274	635	33	38	79	132	73
tRF#22-Z87HFK8S4	TTTGGGTGCGAGAGGTCCCGGG	i-tRF	57	100	0	32	128	118	100	149	163	0	0	0	28	17	84	1300	36	290.998	11	24	0	507.998	245	317
tRF#29-RK9P4P9L5HH0	GGGGGTGTAGCTCAGTGGTAGAGCGCGTG	5_tRF	99.996	52.998	10.998	147	78	102	156	64.002	219	0	53.004	30	42	42	162	569.004	225	1282	13.998	0	0	234	95.004	19.002
tRF#32-RKVP4P9L5FZU3	GGGGGTATAGCTCAGTGGTAGAGCATTTGACT	5_tRF	44	45	16	10	0	10	14	52	20	0	0	0	0	0	822	519	655	581	335	160	179	116	76	41
tRF#38-L85DMKYOYRLHR0D2	CGCGGGAGACCGGGGTTCAATTCCCCGACGGGGAGCCA	3_tRNA_halve	138	12	60	19	46	43	189	166	44	40	11	10	78	21	259	12	67	0	326	1075	861	49	58	74
tRF#39-EH623K76IR3DR2I2	ACGCGGGAGACCGGGGTTCAATTCCCCGACGGGGAGCCA	3_tRNA_halve	16	22	16	0	62	45	110	119	33	0	0	0	0	0	421	46	205	0	1650	288	551	35	27	10
tRF#30-QNR8VP9NFQFY	GCGTTGGTGGTATAGTGGTTAGCATAGCTG	5_tRF	83	83	18	14	69	232	267	324	264	0	0	0	0	0	196	639	48	458	99	13	21	555	184	88
tRF#20-XEKJ5R5N	TGAATCCAGCGATCCGAGTT	i-tRF	0	15	0	0	71	418	468	757	553	0	0	0	0	0	55	226	17	353	24	0	0	366	144	103
tRF#31-JY7383RPD9W1E	CATTGGTGGTTCAGTGGTAGAATTCTCGCCT	5_tRF	10	0	0	0	24	0	13	22	14	0	16	0	15	0	1767	969	112	118	359	73	23	23	0	0
tRF#24-R84QPYVM1H	GGTGGCTCATGCCTGTAGTCCCAG	3_U_tRF	34	66	55	285	0	112	468	202	348	0	0	0	0	10	80	104	218	148	0	393	60	274	181	472
tRF#25-R718YKISQI	GGTCTAGTGGTTAGGATTCGGCGCT	i-tRF	31	22	16	11	69	26	37	164	91	0	29	0	10	0	472	176	404	241	435	837	222	54	91	64
tRF#23-NNBSBKZ3DZ	CTGTTAACCGAAAGGTTGGTGGT	i-tRF	31	31	0	0	19	198	326	541	376	0	17	0	69	39	79	515	88	383	98	44	0	335	150	161
tRF#29-3L7L73V6M9I3	CCGTAGTGTAGTGGTTATCACGTTCGCCT	5_tRF	16	0	0	0	49	17	0	12	12	0	0	0	0	0	1722	621	327	380	173	60	19	27	46	0
tRF#38-31QJ3KYUYRR6RBD2	CCGCCGCGGCCCGGGTTCGATTCCCGGTCAGGGAACCA	3_tRNA_halve	459.999	39.996	0	10.998	131.004	92.997	38.997	148.995	52.002	205.992	144.999	0	401.994	45	405	163.008	75.996	244.998	371.997	71.001	35.001	56.997	243.999	32.004
tRF#38-QB1MK8YUBS68BFD2	GCGAAAGGTCCCCGGTTCGAAACCGGGCGGAAACACCA	3_tRNA_halve	338.002	0	0	9.996	33.992	18.998	27.006	21	28	144.998	25.004	0	1863.01	70	437.01	86.002	0	14	238	31.01	0	11.004	51.002	9.996
tRF#22-WE884U1D2	TCGATTCCGGCTCGAAGGACCA	3_tRF	29	12	0	18	0	422.998	919	399.998	468.998	128.998	113.998	14	259	143	0	148.002	0	103	0	78	0	55	69.998	0
tRF#20-JMRPFQRD	CAGTCGGTAGAGCATGGGAC	i-tRF	12	12	0	0	13	195	352	450	562	0	0	0	0	0	129	225	61	364	19	43	0	474	147	314
tRF#29-PNR8YP9LONHK	GCATTGGTGGTTCAGTGGTAGAATTCTCG	5_tRF	176	70	24	117	163	59	82	248	107	84	313	377	105	102	178	280	53	186	382	50	11	114	57	32
tRF#35-9EYK46S9Y8RH93	TGGATTTAGGCTCCAGTCTCTTCGGGGGCGTGGGT	i-tRF	223	290	14	321	58	38	72	47	36	44	214	49	56	103	408	389	176	116	21	141	32	257	159	103
tRF#28-QNR8VP9NFQ9	GCGTTGGTGGTATAGTGGTTAGCATAGC	5_tRF	83	97	0	30	249	226	239	756	341	0	0	0	0	18	64	242	45	233	568	0	0	72	65	36
tRF#30-897PVP941QKS	TCCTCGTTAGTATAGTGGTGAGTATCCCCG	5_tRF	135	46	0	20	124	87	84	219	175	15	16	0	0	0	221	543	142	567	97	38	20	419	247	135
tRF#28-QNR8VP94FQ9	GCGTTGGTGGTATAGTGGTGAGCATAGC	5_tRF	245.004	141	16.002	76.998	322.002	256.002	343.002	721.002	562.998	0	0	0	0	19.998	129	93	120	160.002	36	0	0	46.002	18	19.998
tRF#23-PNR8YP9LD6	GCATTGGTGGTTCAGTGGTAGAA	5_tRF	143	24	0	34	160	175	199	308	278	0	63	72	23	33	125	213	128	253	394	33	0	318	149	131
tRF#29-QNR8VP9NFQEW	GCGTTGGTGGTATAGTGGTTAGCATAGCT	5_tRF	55	70	0	34	197	181	192	927	404	0	0	10	0	23	137	150	18	250	399	24	0	56	81	38
tRF#28-79MP9P9NH50E	GTTTCCGTAGTGTAGTGGTTATCACGTT	5_tRF	227	29	0	30	43	39	61	87	51	20	12	24	138	25	1047	380	91	161	528	54	0	42	89	50
tRF#23-YJIHFKVHDX	TTAGCATGCGAGAGGTAGCGGGA	i-tRF	44	32	0	0	32	157	190	214	226	10	15	30	13	11	140	909	21	214	0	10	0	498	223	233
tRF#33-86J8WPMN1E8Y0E	TCCCACATGGTCTAGCGGTTAGGATTCCTGGTT	5_tRF	239	179	16	42	64	13	30	59	21	22	23	0	0	0	858	318	138	245	769	127	10	15	16	10
tRF#22-WEKSPM852	TCGATCCCCGGCATCTCCACCA	3_tRF	42	0	0	38	0	190	463	170	196	324	311	58	481	382	0	137	0	202	0	52	0	95	65	0
tRF#29-897PVP9N1Q1J	TCCTCGTTAGTATAGTGGTTAGTATCCCC	5_tRF	105	16	54	55	126	79	12	59	53	116	273	735	79	184	165	105	153	339	74	58	28	127	173	29
tRF#29-3K7SIR3DR2I2	CCGGGGTTCGATTCCCCGACGGGGAGCCA	3_tRF	59.004	0	0	120	41.004	237	384	144	126	15	12.996	23.004	20.004	30.996	103.008	114	129.996	72	50.004	1000.99	14.004	83.004	330.996	78
tRF#20-79MP9PMN	GTTTCCGTAGTGTAGCGGTT	5_tRF	459	50	0	41	121	54	30	86	23	0	17	38	55	0	642	444	318	372	348	20	0	15	13	27
tRF#31-ZPQR17NSRJ7KE	TTTAGGCTCCAGTCTCTTCGGGGGCGTGGGT	i-tRF	199	140	19	101	62	29	51	53	42	187	276	151	275	149	184	393	134	242	11	120	0	117	99	61
tRF#26-PNR8YP9LOND	GCATTGGTGGTTCAGTGGTAGAATTC	5_tRF	63	96	14	52	83	86	133	153	142	139	294	231	306	178	25	118	67	208	394.001	22	0	123	103	57
tRF#25-87R8WP9N1E	TCCCTGGTGGTCTAGTGGTTAGGAT	5_tRF	224	45	0	31	41	45	46	108	103	0	29	30	16	0	301	221	199	200	1032	104	15	57	151	78
tRF#37-QNR8VP94FQFY392	GCGTTGGTGGTATAGTGGTGAGCATAGCTGCCTTCCA	5_tRNA_halve	141	48	10.002	0	120	79.998	196.998	483	141	0	0	0	0	0	675	670.002	189	154.002	13.998	28.998	42	31.998	37.002	0
tRF#21-LNK8KEP1B	CGATTCCCGGCCAATGCACCA	3_tRF	0	15	0	33	31	230.002	208.002	157	236.998	315.998	393.002	90	350.998	340.998	64	81.998	35.002	136	0	53.998	0	136	124.998	13.998
tRF#29-R8WP9N1EWJI5	GGTGGTCTAGTGGTTAGGATTCGGCGCTC	i-tRF	11	30	22	0	107	27	24	225	116	0	0	0	0	0	430	172	843	301	39	470	115	42	42	11
tRF#22-8B8SOUPR2	TCAAATCCCGGACGAGCCCCCA	3_tRF	0	14.994	0	9.996	69.997	267.001	398.01	230.992	346.996	280.007	259.01	0	265.008	342.005	11.991	129.007	21	97.999	0	12.999	0	112.005	107.997	19.005
tRF#26-86V8WPMN1EE	TCCCATATGGTCTAGCGGTTAGGATT	5_tRF	81	10	0	11	33	0	18	20	17	0	27	0	0	14	326	297	58	160	1681	32	0	52	88	45
tRF#39-I7XUK87SIRMJ6VE2	ATTCTTGCGACCCGGGTTCGATTCCCGGGCGGCGCACCA	3_tRNA_halve	13	87	0	0	146	79	195	1078	202	0	10	0	10	0	175	201	259	107	27	133	31	66	122	27
tRF#27-RKVP4P9L5FQ	GGGGGTATAGCTCAGTGGTAGAGCATT	5_tRF	60	31	33	83	112	59	26	39	89	34	146	450	34	103	284	133	237	358	64	84	0	197	233	31
tRF#35-SP5830MMUKLYM9	GTCAGGATGGCCGAGCGGTCTAAGGCGCTGCGTTC	5_tRNA_halve	74	16	0	0	41	13	28	91	19	0	0	0	0	0	749.999	1222	313.002	95	15	101	27	47	46	17
tRF#21-F91SS2P40	AGCTCAGTCGGTAGAGCATGG	i-tRF	54	28	0	20	127	124	235	803	395	0	0	0	0	16	40	350	25	261	57	19	0	140	163	47
tRF#23-RKVP4P9LDS	GGGGGTATAGCTCAGTGGTAGAG	5_tRF	163.003	366.999	0	71.002	170.001	155.001	11.998	367.003	208.999	0	0	0	0	94	147.998	552.001	159.001	180.001	24.003	31.003	0	117.003	31.003	28
tRF#29-RPM8309MUK1W	GGTAGCGTGGCCGAGTGGTCTAAGGCGCT	5_tRF	90	42	0	10	14	14	16	0	16	0	0	0	0	0	1083	743	142	525	45	16	0	21	83	17
tRF#21-V47PU9XWE	TAGTGGTTAGTACTCTGCGTT	i-tRF	20.997	12.996	0	10.998	27.999	101.997	18	1319	362.997	0	0	0	9.999	14.004	123.003	197.001	80.001	56.997	432	33.003	0	0	21.996	15.003
tRF#22-9X0UD394N	TGTTAACCGAAAGGTTGGTGGT	i-tRF	0	0	0	0	11	203	354	499	335	0	0	0	29	0	104	581	35	194	12	0	0	151	151	185
tRF#30-79MP9P9NH57S	GTTTCCGTAGTGTAGTGGTTATCACGTTCG	5_tRF	261	55	0	71	151	56	59	184	93	10	34	0	14	11	553	360	175	172	344	38	12	58	38	41
tRF#50-Q1Q89P9L8422YRI7XUK8	GCGCCGCTGGTGTAGTGGTATCATGCAAGATTCCCATTCTTGCGACCCGG	5_tRF	0	32	239	77	0	40	41	36	459	14	58	0	668	0	252	44	19	28	0	39	378	66	0	295
tRF#27-RVULE1D3L8N	GGTGCTAATAACGCCAAGGTCGCGGGT	i-tRF	58	31	0	14	29	70	101	98	146	0	0	0	0	0	103	818	45	379	0	48	0	380	341	110
tRF#29-R9JP9P9NH523	GGTTCCATAGTGTAGTGGTTATCACGTCT	5_tRF	178	44	0	26	101	79	103	444	219	0	0	0	0	0	406	220	66	203	387	53	0	52	129	38
tRF#24-R29P4P9LH9	GGGGATGTAGCTCAGTGGTAGAGC	5_tRF	96	59	0	68	60	140	66	62	118	21	72	87	12	119	164	376	117	406	221	38	0	167	196	82
tRF#25-9MV47P596V	TGGTCTAGTGGTTAGGATTCGGCGC	i-tRF	38	14	0	0	78	30	59	141	117	24	16	0	0	0	731	349	77	125	624	170	0	62	57	27
tRF#28-7343RX6NMHD5	GTGGTCTAGTGGTTAGGATTCGGCGCTC	i-tRF	0	0	0	0	37	51	47	363	208	0	0	0	0	0	338	112	585	179	25	524	182	29	50	0
tRF#33-S3M8309NDJ58W	GTAGTCGTGGCCGAGTGGTTAAGGCGATGGACT	5_tRF	0	26	0	0	0	0	0	0	0	0	0	0	0	0	788	791	479	636	0	0	0	0	0	0
tRF#22-73VL8RPY5	GTGGTTAGTATCCCCGCCTGTC	i-tRF	28	14	0	0	44	30	63	127	50	0	0	0	0	0	596	565	631	210	38	185	12	20	86	0
tRF#21-P4R8YP9L0	GCATGGGTGGTTCAGTGGTAG	5_tRF	15	24	0	0	20	250	331	339	654	26	69	29	32	29	125	113	39	214	13	14	0	171	92	80
tRF#21-LNK8QJP1B	CGATTCCCGGGCGGCGCACCA	3_tRF	30	16	0	47	93	210	203	114	203	124	332	69	123	162	50	138	53	187	0	75	0	184	207	28
tRF#33-7RH3S3RX8HWV0Q	GTTCCATAGTGTAGTGGTTATCACGTCTGCTTT	5_tRNA_halve	16	0	0	0	52	20	12	13	0	0	0	0	0	0	1120	534	93	210	487	60	25	0	0	0
tRF#21-RPM830MME	GGTAGCGTGGCCGAGCGGTCT	5_tRF	138.996	135	0	44.001	198.999	69.003	78.003	88.002	77.994	86.004	45	82.998	59.004	63.999	126.999	754.998	79.002	127.998	123.003	63	0	64.998	98.001	28.998
tRF#26-R3WE8RO86JD	GGGGTTCGATTCCCCGACGGGGAGCC	3_tRF	66.996	14.004	0	12	63.996	24.996	11.004	15	18	332.004	20.004	0	329.004	36.996	240	65.004	78	27.996	695.004	514.992	18.996	15	15.996	0
tRF#32-JY7383RPD9W1P	CATTGGTGGTTCAGTGGTAGAATTCTCGCCTG	5_tRNA_halve	58	81	10	0	212	38	64	189	112	80	178	0	110	77	272	208	173	553	0	30	11	60	81	0
tRF#24-SX73V2Y81W	GTCTAGTGGTTAGGATTCGGCGCT	i-tRF	36	11	0	0	35	0	20	117	65	19	12	0	32	0	448	193	234	198	580	484	41	20	38	0
tRF#31-897PVP9N1QKSD	TCCTCGTTAGTATAGTGGTTAGTATCCCCGC	5_tRF	50	11	27	51	157	47	12	29	57	80	253	609	30	115	206	50	213	209	58	41	10	103	113	0
tRF#27-WJ9X0UD394N	TCGGCTGTTAACCGAAAGGTTGGTGGT	i-tRF	82	46	0	0	46	124	225	285	305	0	12	16	20	13	121	312	37	256	83	15	11	281	110	117
tRF#20-947673FE	TGGTGGTTCAGTGGTAGAAT	5_tRF	45.45	20	0	10.91	15.45	159.09	209.09	128.18	184.55	0	0	0	0	0	149.09	265.45	140	700.91	10.91	0	0	244.55	157.27	64.55
tRF#22-QNR8VP9NH	GCGTTGGTGGTATAGTGGTTAG	5_tRF	37	58	11	25	41	156	167	154	215	10	0	0	16	17	171	272	90	265	244	22	0	277	112	127
tRF#37-RPFQRDWXHR13M8N	GGTAGAGCATGGGACTCTTAATCCCAGGGTCGTGGGT	i-tRF	23.001	42	0	0	14.001	185.001	308.001	303	287.001	0	9.999	0	0	0	252.999	246	27	104.001	0	11.001	15	297	156.999	168
tRF#31-QNR8VP94FQFYD	GCGTTGGTGGTATAGTGGTGAGCATAGCTGC	5_tRF	156	97.998	18	48	76.002	189	286.002	441	381	0	0	0	0	0	123	114	36	234	10.002	0	0	165	58.998	13.002
tRF#43-79MP9P9NH57S362VD6	GTTTCCGTAGTGTAGTGGTTATCACGTTCGCCTCACACGCGAA	5_tRF	82.998	218.997	30.996	21.996	10.998	61.002	378	180	156.006	0	68.004	0	11.997	0	282.006	65.997	81	67.995	0	9.999	288.999	205.002	105.993	116.001
tRF#36-RKVP4P9L5FZUNF0	GGGGGTATAGCTCAGTGGTAGAGCATTTGACTGCAG	5_tRNA_halve	35	43	12	16	15	0	0	54	0	0	0	0	0	0	487	670	318	195	98	135	135	143	51	22
tRF#30-YSV4V47Q2WW1	TTCCGTAGTGTAGTGGTTATCACGTTCGCC	5_tRF	105	17	0	0	42	74	102	100	109	0	0	0	0	0	226	495	57	493	30	15	0	272	248	41
tRF#25-S3M8309NDJ	GTAGTCGTGGCCGAGTGGTTAAGGC	5_tRF	116	68	0	42	149	39	33	30	48	0	48	16	12	57	695	585	97	189	107	10	0	19	30	21
tRF#24-P4R8YP9LH7	GCATGGGTGGTTCAGTGGTAGAAT	5_tRF	12	21	0	0	11	161	293	328	559	22	38	0	47	57	104	129	22	208	37	0	0	176	85	98
tRF#26-W1X6L85J3KE	TCGCCTGCCACGCGGGAGGCCCGGGT	i-tRF	20	40	0	25	32	64	129	184	157	45	59	39	129	21	65	485	38	365	23	41	0	243	136	60
tRF#22-YUYRLHR0J	TTCGATTCCCCGACGGGGAGCC	3_tRF	62.004	0	0	23.004	44.004	0	0	27	0	128.004	0	0	349.992	66.996	84.996	36.996	45	0	909	576	21	0	26.004	0
tRF#31-34HWH3RXSINHE	CCGTGATCGTATAGTGGTTAGTACTCTGCGT	5_tRF	0	27.999	0	9.999	0	35.001	11.997	402.003	187.002	14.004	0	0	0	20.997	529.002	255.996	82.998	83.997	612.999	42.003	27	16.002	18	15.003
tRF#29-MUWLV47PU9J8	CGTGATCGTATAGTGGTTAGTACTCTGCG	5_tRF	35.001	27	0	12.996	42.003	63	69.003	191.997	114.003	156.996	210.996	73.998	168.003	163.998	247.995	189.999	14.004	113.004	360	10.998	9.999	60.003	36	17.001
tRF#28-34HWH3RXSIDP	CCGTGATCGTATAGTGGTTAGTACTCTG	5_tRF	18	30.996	9.999	0	111.996	104.004	82.998	671.004	500.004	24.003	35.001	0	29.997	26.001	234.999	187.002	53.001	84.996	120.996	18	18.999	16.002	9.999	0
tRF#38-79MP9P9NH57S36D1	GTTTCCGTAGTGTAGTGGTTATCACGTTCGCCTCACAC	5_tRNA_halve	66.996	57.006	38.997	0	113.994	151.002	315.999	278.001	132.003	0	41.994	0	0	0	149.994	91.008	119.007	183.996	32.994	9.999	86.994	305.001	164.997	38.997
tRF#20-73V2Y8L9	GTGGTTAGGATTCGGCGCTC	i-tRF	64	18	0	22	20	131	142	401	302	0	0	0	0	0	72	160	219	275	114	135	10	101	126	61
tRF#23-86J8WPMNY	TCCCACATGGTCTAGCGGTTAGG	5_tRF	158	62	0	43	180	67	125	162	154	62	43	0	50	70	151	160	57	149	503	31	0	65	57	14
tRF#21-735L8RPYE	GTGGTGAGTATCCCCGCCTGT	i-tRF	46	37	0	19	53	43	95	113	81	32	12	0	22	0	221	415	272	264	206	204	14	77	108	24
tRF#22-43RX6NMH3	CTAGTGGTTAGGATTCGGCGCT	i-tRF	62	15	0	15	71	16	40	75	58	10	0	0	0	18	304	165	303	142	509	304	66	58	75	46
tRF#27-9N1EWJQ72SJ	TGGTTAGGATTCGGCGCTCTCACCGCC	i-tRF	37	44	0	0	11	135	296	585	614	0	0	0	0	0	0	86	11	125	0	17	11	198	78	102
tRF#39-EH6KK87SIRM1DVE2	ACGCGGGAGGCCCGGGTTCGATTCCCGGCCAATGCACCA	3_tRNA_halve	0	22.998	0	0	120	52.002	135.996	369	106.002	0	40.998	0	0	77.004	199.992	147.006	294	79.002	313.998	115.998	55.002	68.004	96.996	13.998
tRF#23-7SIR3DR2DV	GTTCGATTCCCCGACGGGGAGCC	3_tRF	78.996	0	0	15.996	54.996	12	0	18.996	12.996	125.004	0	0	180.996	62.004	114.996	30.996	65.004	14.004	939.004	529	24.996	0	15.996	0
tRF#20-9N1EWJQ7	TGGTTAGGATTCGGCGCTCT	i-tRF	50	17	0	26	73	162	197	360	396	0	0	0	0	0	103	128	128	191	10	136	18	138	88	74
tRF#22-WE8SSP6D2	TCGATTCCCGGTCAGGGAACCA	3_tRF	39	27	0	46	82	150	192	290	246	113	110	112	230	98	37	61	30	117	0	75	0	87	112	35
tRF#18-WE8RO8DX	TCGATTCCCCGACGGGGA	3_tRF	18.996	0	0	0	15	0	0	9.996	0	367.996	0	0	1492	84.004	0	0	0	14.004	241	39.996	0	0	0	0
tRF#35-79MP9P9NH57S3O	GTTTCCGTAGTGTAGTGGTTATCACGTTCGCCTAA	5_tRNA_halve	0	0	0	0	11.998	19.999	80.997	73.997	59.997	0	0	0	0	0	564.998	374.003	390.999	186.998	331.002	82.999	15.001	50.995	30.002	0
tRF#40-2VR008R959KUMKF6	CACGCGGGAGACCGGGGTTCGATTCCCCGACGGGGAGCCA	3_tRNA_halve	37.992	37.008	42.996	99.996	49.992	133.008	650.004	315	168	0	64.992	0	9.996	0	99	0	54.996	27.996	0	93	46.992	129	102.996	98.004
tRF#24-9N1EWJQ7FV	TGGTTAGGATTCGGCGCTCTCACC	i-tRF	99	40	0	24	97	105	222	266	439	0	10	0	10	13	77	138	62	186	0	21	0	227	135	73
tRF#28-ZJ47D112Z4DZ	TTGGCCTCCTAAGCCAGGGATTGTGGGT	i-tRF	0	11	0	0	18	60	182	135	178	0	0	0	0	0	52	284	34	104	0	37	11	647	194	295
tRF#23-YKIHFK8SDZ	TTAGGATGCGAGAGGTCCCGGGT	i-tRF	126	48	0	35	17	70	145	140	127	13	29	0	21	26	71	501	56	188	26	26	0	243	186	147
tRF#21-SBKKRSL3E	GTAAACCAGGGGTCGCGAGTT	i-tRF	56	22	0	0	32	145	220	177	227	0	0	0	0	0	81	346	15	262	0	0	0	346	139	164
tRF#31-ZRS3S3RX8HYVD	TTTCCGTAGTGTAGTGGTTATCACGTTCGCC	5_tRF	77	25	0	0	48	81	113	136	134	0	0	0	0	0	261	346	84	375	53	0	12	249	201	29
tRF#20-HJ839L5F	ATAGCTCAGTTGGTAGAGCA	i-tRF	50	0	0	15	171	54	0	42	35	83	112	312	40	130	194	59	165	407	33	65	0	66	155	25
tRF#25-KY7343RX6N	CCCTGGTGGTCTAGTGGTTAGGATT	5_tRF	275	16	0	25	0	35	26	47	105	0	0	20	15	0	361	342	61	151	327	90	13	71	186	28
tRF#30-08R959KUMKF6	ACCGGGGTTCGATTCCCCGACGGGGAGCCA	3_tRF	53.004	0	0	75	28.992	113.004	154.992	96.996	72	20.004	12.996	11.004	0	0	60.996	76.992	93	78.996	0	795.996	0	96.996	269.004	81
tRF#35-JY7383RPD9W1X6	CATTGGTGGTTCAGTGGTAGAATTCTCGCCTGCCA	5_tRNA_halve	71	22	0	17	92	30	62	187	52	0	59	27	15	0	576	520	102	146	14	33	15	78	62	10
tRF#23-3K7SIR3DDY	CCGGGGTTCGATTCCCCGACGGG	i-tRF	216	34	0	15	177	0	27	79	44	0	0	0	0	0	92	376	71	140	211	341	124	41	57	138
tRF#20-LNKSEK51	CGATTCCCCGACGGGGAGCC	3_tRF	51.996	12	0	15	21.996	0	0	17.004	18.996	81	0	11.004	276.996	81	57	24.996	41.004	12	1023	424.996	0	0	0	0
tRF#34-87R8WP9I1EWJIQ	TCCCTGGTGGTCTAGTGGCTAGGATTCGGCGCTT	5_tRNA_halve	68	72	44	13	107	34	64	168	81	0	0	0	0	0	499	385	238	103	141	75	22	17	23	0
tRF#27-918XF6RE98N	TGGCCTCCTAAGCCAGGGATTGTGGGT	i-tRF	17	0	0	0	19	57	142	152	133	0	0	0	28	10	43	438	82	284	0	20	0	388	168	166
tRF#19-70VR31KD	GTGAGTATCCCCGCCTGTC	i-tRF	849	248	14	270	0	21	35	72	102	0	0	0	0	0	77	171	163	39	0	33	0	29	16	0
tRF#29-IKE7UMKKSWIZ	ATGGGACTCTTAATCCCAGGGTCGTGGGT	i-tRF	72	0	0	0	84	107	97	137	216	26	38	0	44	42	426	491	50	111	0	15	0	51	89	18
tRF#35-86J8WPMN1E8Y7Z	TCCCACATGGTCTAGCGGTTAGGATTCCTGGTTTT	5_tRNA_halve	12	0	0	13	0	0	17	23	14	0	0	0	0	0	679	176	240	106	726	34	43	12	11	0
tRF#33-86V8WPMN1E8Y0E	TCCCATATGGTCTAGCGGTTAGGATTCCTGGTT	5_tRF	26	14	0	0	13	24	33	52	22	137	193	20	80	107	271	133	41	96	618	57	36	43	71	19
tRF#20-F91SS2P4	AGCTCAGTCGGTAGAGCATG	i-tRF	112	27	0	62	100	122	160	385	265	23	38	48	43	28	51	98	27	159	136	78	0	52	48	34
tRF#37-79MP9P9MH57S3O2	GTTTCCGTAGTGTAGTGGTCATCACGTTCGCCTAACA	5_tRNA_halve	39	12	0	0	28	22	42	66	29	0	0	0	0	0	774	709	138	84	20	35	28	27	36	0
tRF#21-93Q01M3KE	TGGGTGCGAGAGGTCCCGGGT	i-tRF	51	28.998	0	30	40.998	111	121.998	156	196.002	13.002	0	0	0	13.002	94.002	618.002	12	91.002	13.002	21	0	210	106.002	154.998
tRF#31-PW5SVP9N15WV0	GCCGTGATCGTATAGTGGTTAGTACTCTGCG	5_tRF	27	16.002	0	16.002	38.997	47.997	21.996	193.005	99	182.997	108	29.997	167.004	219.996	244.998	196.992	0	127.998	321.003	0	0	0	10.998	0
tRF#32-PSQP4PW3FJIK1	GCCCGGCTAGCTCAGTCGGTAGAGCATGGGAC	5_tRF	57.999	24.999	0	11.001	36	74.001	134.001	357	185.001	9.999	0	57	24	0	44.001	266.001	29.001	219.999	153.999	53.001	0	206.001	69	54
tRF#20-P4R8YP9L	GCATGGGTGGTTCAGTGGTA	5_tRF	22	15	0	13	51	138	187	285	244	29	145	223	65	79	53	57	19	152	42	0	0	90	42	102
tRF#30-Q1Q89P9L8422	GCGCCGCTGGTGTAGTGGTATCATGCAAGA	5_tRF	217	131	14	120	130	84	125	174	110	11	45	73	36	30	71	168	22	144	19	21	0	126	91	60
tRF#20-VIJNRX5H	TAGCTCAGTTGGTTAGAGCG	i-tRF	0	0	13	70	38	12	27	10	0	29	152	147	32	83	132	160	122	444	15	223	0	46	242	0
tRF#20-OJR44ZIZ	GAAGCGGGTGCTCTTATTTT	3_U_tRF	61	12	0	15	19	470	295	562	252	0	0	0	0	0	59	170	29	43	0	0	0	0	0	0
tRF#32-79MP9P9MH57SJ	GTTTCCGTAGTGTAGTGGTCATCACGTTCGCC	5_tRF	86	28	0	0	59	20	54	90	53	0	0	0	0	0	538	547	121	185	82	42	11	34	26	0
tRF#29-94SX73V2Y81W	TGGTGGTCTAGTGGTTAGGATTCGGCGCT	5_tRF	44	34	0	10	19	58	72	150	223	0	0	0	17	0	278	109	201	190	201	141	29	116	46	29
tRF#20-M0NK5Y93	CGGAGCTGGGGATTGTGGGT	i-tRF	24	13	0	16	34	81	139	76	96	0	0	0	0	0	80	461	139	341	25	19	0	192	147	71
tRF#29-R3SJ83RPFV2M	GGGGTGTAGCTCAGTGGTAGAGCGCGTGC	5_tRF	75	31.998	0	49.002	19.002	61.998	73.002	24	67.998	0	0	0	0	0	195	623.994	105.996	253.002	0	0	0	193.002	129.996	40.998
tRF#28-R4VIJ4S2QH0M	GGGTGTAGCTCAGTGGTAGAGCGCGTGC	5_tRF	34.002	49.998	0	39	16.998	54	109.002	40.002	87	0	0	0	0	0	171	625.002	124.002	382.998	0	0	0	128.004	46.998	34.998
tRF#28-79MP9PMNH5DE	GTTTCCGTAGTGTAGCGGTTATCACATT	5_tRF	196	15	0	0	27	11	40	49	31	0	0	0	20	0	603	234	78	253	276	0	0	36	45	28
tRF#21-9O0PRMQ0E	TGTAAACCAGGGGTCGCGAGT	i-tRF	34	28	0	11	44	70	68	101	113	0	0	0	0	0	112	453	24	196	0	11	0	280	226	166
tRF#21-94SX73V2E	TGGTGGTCTAGTGGTTAGGAT	5_tRF	26	51	0	0	44	89	145	246	376	0	0	0	0	26	112	155	139	211	0	12	0	137	54	108
tRF#25-RKVP4P9L5F	GGGGGTATAGCTCAGTGGTAGAGCA	5_tRF	37	32	0	13	13	0	43	57	66	0	0	0	0	21	241	240	166	456	57	30	0	258	111	82
tRF#28-K87SIRMM12V	CCCGGGTTCGATTCCCGGTCAGGGAACC	3_tRF	141.003	18.999	0	9.999	74.997	29.997	11.997	46.998	48.996	66.996	0	0	237.996	46.998	209.007	57.996	63	36	577.998	170.001	0	10.998	25.002	0
tRF#22-3K7SIR3D4	CCGGGGTTCGATTCCCCGACGG	i-tRF	104	15	0	25	51	0	16	33	23	0	0	0	0	0	175	325	96	78	177	413	135	26	23	145
tRF#33-389MV47P596V03	CCTGGTGGTCTAGTGGTTAGGATTCGGCGCTCT	5_tRNA_halve	12	0	0	0	75	121	140	623	278	0	0	0	0	0	305	84	87	27	0	48	40	0	0	0
tRF#33-RKIP4OI3FJQSDQ	GGGGGATTAGCTCAAATGGTAGAGCGCTCGCTT	5_tRF	0	75	0	0	27	0	0	11	0	0	0	0	0	0	363	410	396	325	142	75	0	14	0	0
tRF#23-7EMQ18Y3W	GTGATCGTATAGTGGTTAGTACT	5_tRF	9.999	14.004	0	0	18.999	26.001	19.998	59.004	69.003	14.004	81.999	21.996	72.999	108.999	317.997	51.003	18	66.996	825.003	0	0	16.002	24.003	0
tRF#34-31QJ3KYUYRR6IX	CCGCCGCGGCCCGGGTTCGATTCCCGGTCAGGGA	3_tRNA_halve	104.004	0	0	0	18.999	0	0	12.996	0	400.995	14.004	20.997	1076	30.996	24.003	10.998	0	10.998	108	0	0	0	0	0
tRF#22-79MP9P9NI	GTTTCCGTAGTGTAGTGGTTAT	5_tRF	67	16	0	16	22	89	68	58	56	11	0	0	12	0	259	151	80	249	420	10	0	60	118	65
tRF#23-9V881X3S0Q	TGTGCTCCGGAGTTACCTCGTTT	3_U_tRF	184	45	0	35	38	418	212	210	291	52	25	0	52	43	50	67	42	44	0	0	0	13	0	0
tRF#18-YRRHQFD2	TTCCCGGGCGGCGCACCA	3_tRF	20	0	0	21	131	66	183	86	68	57	48	0	27	52	105	190	69	97	15	105	0	146	274	50
tRF#30-MUWLV47PU9XW	CGTGATCGTATAGTGGTTAGTACTCTGCGT	5_tRF	23.004	0	0	0	21.996	32.004	0	210.996	113.004	87.003	63.999	0	53.001	54	490.005	205.002	27.999	38.997	316.998	18	19.998	18	9.999	0
tRF#32-389MV47P596V5	CCTGGTGGTCTAGTGGTTAGGATTCGGCGCTC	5_tRNA_halve	11	28	0	0	82	73	53	467	195	0	0	0	0	0	212	76	300	101	16	103	72	15	0	0
tRF#34-623K7SIR3DR2I2	GGAGACCGGGGTTCGATTCCCCGACGGGGAGCCA	3_tRF	24.996	0	0	93	9.996	51.996	95.004	105.996	56.004	18	89.004	26.004	0	0	24	20.004	66.996	45	0	596.004	71.004	86.004	193.008	129
tRF#23-S3M8309NS	GTAGTCGTGGCCGAGTGGTTAAG	5_tRF	81	74	0	92	156	154	121	148	177	26	39	15	12	37	102	189	94	93	39	34	0	37	53	20
tRF#20-94V4SMIF	TGGTGTAGTGGTATCATGCA	i-tRF	17	0	0	0	0	180	137	349	174	0	0	0	0	0	25	131	21	243	0	10	0	222	203	55
tRF#35-73V2Y8L981PV6R	GTGGTTAGGATTCGGCGCTCTCACCGCCGCGGCCC	i-tRF	34	44	24	0	20	110	196	338	388	0	0	0	0	0	72	79	35	107	0	23	27	99	113	53
tRF#31-N3R718YKISQID	CTGGTGGTCTAGTGGTTAGGATTCGGCGCTC	5_tRNA_halve	19	21	0	0	33	48	38	268	170	0	0	0	0	0	252	83	442	129	19	141	50	26	22	0
tRF#50-PW5SVP9N15WV7W6SJF09	GCCGTGATCGTATAGTGGTTAGTACTCTGCGTTGTGGCCGCAGCAACCTC	5_tRF	0	0	59.004	11.997	0	0	0	0	78.003	36.999	101.997	16.002	1232	14.004	183.996	9.999	0	0	0	0	0	0	0	14.004
tRF#32-7EMQ18Y3E7QNN	GTGATCGTATAGTGGTTAGTACTCTGCGTTGT	5_tRNA_halve	17.001	12.996	0	0	0	26.001	18.999	189.999	92.997	18.999	16.002	0	15.003	11.997	733.005	244.998	156.996	41.004	42.003	41.004	54	19.998	0	0
tRF#22-3OPP6N7KQ	CCTAAGCCAGGGATTGTGGGTT	i-tRF	39	0	0	0	42	17	10	15	11	0	0	0	0	14	204	139	95	503	44	17	0	328	184	89
tRF#27-NMVLBP5E38N	CTGTCTAGTAAACAGGAGATCCTGGGT	i-tRF	0	14	0	0	0	62.998	56.001	127.998	94.003	0	0	0	11	16	46.003	488.002	12	429.001	0	0	0	219.002	115.001	53.003
tRF#23-9N1EWJQ7D1	TGGTTAGGATTCGGCGCTCTCAC	i-tRF	57	19	0	22	30	71	99	151	322	0	0	0	0	0	82	144	115	290	0	14	0	136	112	69
tRF#25-79MP9P9NH5	GTTTCCGTAGTGTAGTGGTTATCAC	5_tRF	70	0	0	0	30	16	16	20	0	0	10	0	34	16	326	263	91	227	440	26	14	32	60	33
tRF#30-QSZ34KRQ59WI	GCTCGTTGGTCTAGGGGTATGATTCTCGCT	5_tRF	87	21	0	0	0	44	69	31	156	0	0	0	0	0	67	272	60	788	0	0	0	76	49	0
tRF#23-4EBV2KWHDZ	CTAATAACGCCAAGGTCGCGGGT	i-tRF	30	24	0	0	0	79	58	142	91	0	0	0	0	0	26	602	29	236	0	23	0	151	192	30
tRF#21-ZKXU53K80	TTGGGTGCGAGAGGTCCCGGG	i-tRF	58.002	31.998	0	10.002	19	111.002	72	99.998	116.002	0	0	0	0	0	13.998	588.996	16.002	218	0	0	0	149.002	101.998	105.002
tRF#24-MUWLV47P2W	CGTGATCGTATAGTGGTTAGTACT	5_tRF	18.999	9.999	0	0	0	19.998	0	43.002	45.999	27	0	0	96.003	126	405.999	46.998	27.999	60.003	747.999	0	0	14.004	16.002	0
tRF#22-V47P596V5	TAGTGGTTAGGATTCGGCGCTC	i-tRF	18	16	0	0	32	55	61	181	140	12	0	0	0	0	127	71	447	161	187	122	0	37	10	19
tRF#35-QNR8VP94FQFY39	GCGTTGGTGGTATAGTGGTGAGCATAGCTGCCTTC	5_tRNA_halve	16.998	67.002	0	0	31.002	25.998	51	253.998	94.002	0	10.998	0	0	0	184.998	130.998	405	292.998	33	21	19.998	37.998	12	0
tRF#26-R718YKISQID	GGTCTAGTGGTTAGGATTCGGCGCTC	i-tRF	20	0	0	0	28	16	30	145	80	0	0	0	0	0	136	92	360	157	17	464	83	19	20	12
tRF#29-PM8OHP3D7YHQ	GCATCTCCAAATCAGCCGACGTTTGCTTT	3_U_tRF	119	17	0	23	95	28	31	0	19	0	0	0	0	0	855	234	35	191	0	0	0	12	14	0
tRF#23-QNR8VP949	GCGTTGGTGGTATAGTGGTGAGC	5_tRF	276.997	21	0	50.001	86.002	85.001	100.996	87.997	147	0	0	0	0	0	133	197.001	87.998	171.997	129.997	0	0	42	31.003	19.999
tRF#36-S2P46INO86RM7KE	GTAGAGCATGGGACTCTTAATCCCAGGGTCGTGGGT	i-tRF	11	23	0	0	11	108	207	226	220	16	28	0	14	0	148	109	28	73	0	0	34	207	90	107
tRF#26-94SX73V2Y8D	TGGTGGTCTAGTGGTTAGGATTCGGC	5_tRF	54	34	0	0	47	71	107	217	321	0	0	0	16	0	103	149	48	169	38	0	0	146	62	77
tRF#22-WKXU53K8N	TCGGGTGCGAGAGGTCCCGGGT	i-tRF	45	23.001	0	12.999	29.001	114	71.001	158.001	108.999	0	0	0	21.999	0	74.001	525	0	120	17.001	20.001	0	130	113.001	75
tRF#21-9DH48V7KE	TGGACATATGTCCGCGTGGGT	i-tRF	19	48	0	0	18	15	43	37	23	0	0	0	0	0	87	207	55	251	23	119	12	269	284	144
tRF#27-MKYUYRLHR0J	CGGGGTTCGATTCCCCGACGGGGAGCC	3_tRF	53.004	0	0	17.004	21	14.004	0	18.996	0	305.004	0	15	246	102	96.996	32.004	36.996	17.004	231	422.004	18	0	0	0
tRF#25-VLV47PVR31	TAGTATAGTGGTTAGTATCCCCGCC	i-tRF	54	0	12	0	20	0	0	0	0	22	1297	31	0	10	0	0	10	0	151	12	0	0	0	0
tRF#21-3OPP6N7KE	CCTAAGCCAGGGATTGTGGGT	i-tRF	17	0	0	0	29	49	39	20	51	34	93	90	49	72	98	191	64	233	17	45	0	232	101	83
tRF#33-34HWH3RXSINH0P	CCGTGATCGTATAGTGGTTAGTACTCTGCGTTG	5_tRNA_halve	26.001	72	14.004	0	81	45.999	44.001	421.002	225.999	43.002	132.003	55.998	26.001	43.002	90	81.999	39.996	37.998	19.998	72	17.001	0	17.001	0
tRF#33-RKVP4P9L5FZUDP	GGGGGTATAGCTCAGTGGTAGAGCATTTGACTG	5_tRNA_halve	18	77	14	0	11	0	0	20	17	0	0	0	0	0	97	110	579	568	0	25	0	41	17	11
tRF#24-34HWH3RX21	CCGTGATCGTATAGTGGTTAGTAC	5_tRF	17.001	0	0	0	10.998	63	71.001	159.003	110.997	26.001	26.001	0	43.002	45.999	212.004	63	63	162	396.999	0	0	65.997	39.996	21.996
tRF#23-QR17NSRJ00	GCTCCAGTCTCTTCGGGGGCGTG	i-tRF	22.001	18.998	0	0	45.003	15.001	45.997	52.003	59.997	88.998	49	23.002	102.998	37.002	177.002	637	38.003	73.997	0	38.003	0	23.002	29.001	16.002
tRF#20-HJ83925H	ATAGCTCAGTTGGGAGAGCG	i-tRF	19	0	22	21	106	32	0	10	0	25	30	301	28	36	111	79	93	137	0	382	25	44	89	0
tRF#22-WB86N7O52	TCGAATCCCACTTCTGACACCA	3_tRF	23	22.999	0	0	0	76.002	100.002	94.002	155.001	122	35.001	14	189	124.003	11.998	169.003	16	176.003	0	18.998	0	140.997	81.001	17.003
tRF#23-3V2VR0PSDZ	CCTGCCACGCGGGAGGCCCGGGT	i-tRF	44	37	0	20	33	41	86	79	65	14	23	0	0	0	37	525	0	203	0	36	0	202	109	31
tRF#25-QP4PW3FJIK	GCTAGCTCAGTCGGTAGAGCATGGG	i-tRF	0	10	0	0	24	83	189	239	219	0	22	26	12	0	18	340	16	177	0	0	0	77	81	49
tRF#23-WP9N1EWJDW	TCTAGTGGTTAGGATTCGGCGCT	i-tRF	43	10	0	12	13	25	22	83	100	27	24	0	42	21	68	80	337	88	133	265	70	38	37	37
tRF#21-R4L2RRM3E	GGGTGCGAGAGGTCCCGGGTT	i-tRF	37	0	0	12	32	80	108	210	229	0	0	0	0	0	32	232	28	100	26	0	0	187	83	170
tRF#24-RK9P4P9LH9	GGGGGTGTAGCTCAGTGGTAGAGC	5_tRF	82	48	0	38	20	90	84	47	81	0	28	0	10	21	261	181	112	254	76	0	0	58	46	25
tRF#38-7K7RWFQ9QV70JZ0N	GTGGGGTTCCTCGCAGCTTCGCTGCGTGAGCATTTTGT	3_U_tRF	29	111	15	22	206	44	104	0	263	0	0	0	0	0	362	83	132	73	0	0	24	79	13	0
tRF#21-9V881X3SE	TGTGCTCCGGAGTTACCTCGT	3_U_tRF	15	0	0	0	17	77	31	65	54	260	212	68	308	140	34	41	36	94	0	11	0	56	22	19
tRF#38-P21MNKYUPR18B6D2	GCAGAAGGTCCTGGGTTCGAGCCCCAGTGGAACCACCA	3_tRNA_halve	347.997	0	0	0	54	82.002	56.001	42.999	30.999	0	0	0	0	0	420	230.001	9.999	15.999	111.999	12	52.998	12.999	62.001	15.999
tRF#22-KY7343RX4	CCCTGGTGGTCTAGTGGTTAGG	5_tRF	80	0	0	25	58	46	53	76	110	0	0	0	0	0	159	278	47	24	254	116	36	68	98	19
tRF#37-897PVP9N1QKS3W2	TCCTCGTTAGTATAGTGGTTAGTATCCCCGCCTGTCA	5_tRNA_halve	90	11	0	0	40	20	30	74	24	0	0	0	0	0	395	174	283	88	23	46	165	32	41	10
tRF#29-MIF91SS2P4IR	CGGCTAGCTCAGTCGGTAGAGCATGGGAC	5_tRF	18.999	21	0	0	14.001	63.999	144.999	216.999	135.999	0	0	0	0	0	33.999	264.999	36.999	284.001	0	0	0	159.999	78	66.999
tRF#23-3W2VR008DZ	CCTGTCACGCGGGAGACCGGGGT	i-tRF	45	51	0	26	13	72	31	100	55	0	12	0	12	0	18	572	14	178	0	19	0	126	150	37
tRF#31-F1R38E8RO86JD	AGACCGGGGTTCAATTCCCCGACGGGGAGCC	3_tRF	45	0	0	0	17	10	10	30	18	0	0	0	17	0	61	0	16	0	266	834	172	0	0	14
tRF#21-18YKISQID	AGTGGTTAGGATTCGGCGCTC	i-tRF	33	19	0	0	10	74	92	267	292	0	0	0	0	0	42	84	210	129	18	86	10	53	44	46
tRF#35-VUY9QZR4L2RRM3	TATGATTCTCGCTTTGGGTGCGAGAGGTCCCGGGT	i-tRF	12	230.998	0	72.996	73.998	88.002	288	306.002	205.998	0	0	0	0	0	57	33	10.002	15	0	0	0	48	13.002	25.002
tRF#26-79MP9P9NH50	GTTTCCGTAGTGTAGTGGTTATCACG	5_tRF	112	18	0	0	57	10	11	28	14	0	0	0	62	14	337	207	70	153	226	24	0	40	58	29
tRF#28-5SVP9N15WV0E	GATCGTATAGTGGTTAGTACTCTGCGTT	i-tRF	9.999	11.997	0	0	28.998	106.002	0	414.999	204.003	19.998	21.996	0	27	46.998	294.003	108.999	0	11.997	118.998	42.003	0	0	0	0
tRF#24-MKYUYRLHIX	CGGGGTTCGATTCCCCGACGGGGA	3_tRF	69.004	0	0	30.996	33	0	0	0	0	236	34	32.004	502	52	72.996	49	27	46.996	121.996	114.996	0	11.004	20.004	12
tRF#50-79MP9P9MH57S3O2VO0SR	GTTTCCGTAGTGTAGTGGTCATCACGTTCGCCTAACACGCGAAAGGTCCC	5_tRF	14	24	85	94	0	25	17	17	332	0	16	0	333	0	295	24	0	0	0	15	85	10	0	76
tRF#18-HR6HFRD2	ATCCCGGACGAGCCCCCA	3_tRF	11.004	0	0	0	93.996	114.009	145.992	109.998	192.969	71.001	79.989	19.992	77.007	38.997	74.004	81.018	24.003	132.006	0	17.01	0	100.968	66.003	9.996
tRF#21-7O3B1NR8E	GTTAACCGAAAGGTTGGTGGT	i-tRF	0	0	0	0	0	57	96	207	129	15	31	29	133	59	53	184	49	166	41	0	0	63	72	72
tRF#26-3K7SIR3DR20	CCGGGGTTCGATTCCCCGACGGGGAG	3_tRF	36	50	0	38	176	27	0	22	0	124	154	121	116	106	46	71	15	62	87	77	30	45	0	42
tRF#23-PSQP4PW3X	GCCCGGCTAGCTCAGTCGGTAGA	5_tRF	86.004	21.996	0	61.002	47.997	95.999	128.997	196.002	179.001	0	0	11.997	12.996	16.002	24.003	45	0	97.002	252.999	25.002	0	75.996	46.998	19.998
tRF#22-F91SS2P44	AGCTCAGTCGGTAGAGCATGGG	i-tRF	27	13	0	0	43	75	135	157	165	0	0	0	0	0	41	363	0	160	13	0	0	128	83	35
tRF#28-9NJ4S2I7L7DV	TGGTTCAGTGGTAGAATTCTCGCCTGCC	i-tRF	14	22	0	0	40	44	116	162	120	0	0	0	0	0	21	195	34	243	0	17	0	230	148	24
tRF#27-M3WD8S746D2	CGGGTTCGACTCCCGGTGTGGGAACCA	3_tRF	17	103	0	35	142	233	310	43	109	16	0	0	0	16	26	36	26	41	0	18	0	51	163	43
tRF#26-QP4PW3FJIKB	GCTAGCTCAGTCGGTAGAGCATGGGA	i-tRF	0	19	0	0	0	43	195	191	236	0	0	0	0	0	33	255	24	212	0	0	0	126	57	36
tRF#21-NB8PLML3E	CTGAATCCAGCGATCCGAGTT	i-tRF	21	16	0	0	63	177	182	247	205	0	0	0	0	0	0	78	12	111	22	0	0	165	89	36
tRF#24-7SIRMM12E2	GTTCGATTCCCGGTCAGGGAACCA	3_tRF	33	10	0	40	39	111	123	145	144	24	14	20	37	0	34	74	62	141	0	91	0	62	179	29
tRF#24-RKVP4P9LH9	GGGGGTATAGCTCAGTGGTAGAGC	5_tRF	52.998	18	0	16.998	47.002	0	0	13.998	13.998	13.998	35	80.998	0	22.998	160.998	145.998	160	291.998	59	37	0	109.002	73.998	51.002
tRF#35-90Q4R9OMKI3U26	TGGAGGCGTGGGTTCGAATCCCACTCCTGACACCA	3_tRF	206.003	10.003	0	0	29.001	22.001	24.997	19.999	17.003	0	0	0	0	0	303.002	197.008	84	139.006	0	17.003	79.002	78.995	142.996	28
tRF#27-RDWXHR13M8N	GGGACTCTTAATCCCAGGGTCGTGGGT	i-tRF	0	21	0	0	0	34	73	93	99	27	72	0	47	32	69	298	16	128	0	15	0	204	122	48
tRF#24-69JMW9RKH0	GGCTCCAGTCTCTTCGGGGGCGTG	i-tRF	74.998	52.003	0	52.997	26.999	15.001	30.002	24.003	28	47.999	21	0	66.003	14	246.001	558.999	54.999	26.999	0	36.001	0	0	18.998	0
tRF#23-YUYRR6RBD2	TTCGATTCCCGGTCAGGGAACCA	3_tRF	19	15	0	68	119	109	144	273	212	19	54	61	0	0	16	10	0	15	0	51	0	105	55	50
tRF#21-941QKS3WD	TGGTGAGTATCCCCGCCTGTC	i-tRF	29	0	0	0	12	66	35	96	59	10	0	0	0	0	252	304	184	114	16	112	0	49	45	11
tRF#26-79MP9PMNH5B	GTTTCCGTAGTGTAGCGGTTATCACA	5_tRF	181	0	0	0	28	10	19	19	19	0	0	0	0	0	432	211	77	204	116	0	0	11	17	17
tRF#18-Y2R79KDK	TTAGAGGTCTTGGGGCCG	5_U_tRF	30	54	0	74	356	120	54	54	130	11	44	70	12	10	36	46	28	33	0	113	0	65	12	0
tRF#38-87R8WP9N1EWJQ7D1	TCCCTGGTGGTCTAGTGGTTAGGATTCGGCGCTCTCAC	5_tRNA_halve	68	30	30	18	209	112	276	297	156	0	15	0	0	0	50	0	25	27	0	0	15	0	10	0
tRF#18-HR0VX6D2	ATCCCACCGCTGCCACCA	3_tRF	26.004	24.002	0	18.997	0	0	11	13.002	33	31.999	111.001	40.997	160.996	35.002	18.997	69.003	168.003	204.996	0	52.998	0	276.001	27.995	14.003
tRF#23-P4R8YP9LD6	GCATGGGTGGTTCAGTGGTAGAA	5_tRF	14	11	0	0	20	120	189	185	299	12	0	18	17	16	64	47	51	81	0	0	0	113	25	53
tRF#36-RK9P4P9L5HMVYJB	GGGGGTGTAGCTCAGTGGTAGAGCGCGTGCTTAGCA	5_tRNA_halve	10	21	0	0	18	0	0	0	0	0	0	0	0	0	409	661	144	53	0	13	0	0	0	0
tRF#33-P4R8YP9LON4VDP	GCATGGGTGGTTCAGTGGTAGAATTCTCGCCTG	5_tRNA_halve	29	69	24	0	41	11	57	170	106	62	190	39	91	82	136	32	77	68	0	15	0	29	0	0
tRF#20-RHM39ONZ	GGGCGCGGGTTGTAACTTTT	3_U_tRF	77	0	0	18	15	133	0	17	0	0	0	0	0	0	269	228	61	462	0	0	0	48	0	0
tRF#21-282K63ZNE	CACGGCAAGGGGAGTTTGTTT	3_U_tRF	21	11	0	57	48	48	23	0	0	0	0	0	0	0	406	191	303	180	0	0	0	23	0	14
tRF#30-897PVP9N1QKS	TCCTCGTTAGTATAGTGGTTAGTATCCCCG	5_tRF	25	13	0	24	101	0	0	30	22	62	103	200	37	40	122	60	111	135	47	39	10	55	73	11
tRF#35-VUY9Q9R4L2RRM3	TATGATTCTCGCTTCGGGTGCGAGAGGTCCCGGGT	i-tRF	0	137.001	0	42.999	56.001	99.999	278.001	303	194.001	0	0	0	0	0	105	33.999	20.001	15	0	0	0	20.001	0	0
tRF#20-JY7383RP	CATTGGTGGTTCAGTGGTAG	5_tRF	0	14	0	0	21	180	117	223	170	0	0	0	0	0	41	98	13	134	55	24	0	110	76	28
tRF#27-5476IR0ZWKK	GAGTGGTTCAATTCCACCTTTCGGGCG	3_tRF	13	0	0	0	0	67	61	10	20	364	67	10	53	67	111	94	0	40	0	24	0	19	280	0
tRF#24-QP4PW3FJFL	GCTAGCTCAGTCGGTAGAGCATGA	i-tRF	33	18	13	40	64	40	17	21	43	11	18	119	21	42	146	78	124	193	25	36	0	54	123	18
tRF#21-R718YKIS0	GGTCTAGTGGTTAGGATTCGG	i-tRF	18	0	0	0	34	0	0	28	11	0	0	0	0	0	168	167	255	147	85	174	90	19	27	62
tRF#31-7EMQ18Y3E7QN0	GTGATCGTATAGTGGTTAGTACTCTGCGTTG	5_tRNA_halve	25.002	45.999	0	0	74.997	53.001	28.998	309.996	183.996	29.997	77.004	18	32.004	54	124.002	60.003	56.997	24.003	19.998	38.997	18	0	0	0
tRF#29-FP18LPMBQ4H4	AGCAGAGTGGCGCAGCGGAAGCGTGCTGG	5_tRF	132.993	14.004	0	0	44.001	15.003	11.997	71.001	18.999	0	0	0	9.999	0	144.999	500.994	37.998	72	98.001	27.999	0	27.999	20.997	25.002
tRF#35-R008R959KUMKF6	GGGAGACCGGGGTTCGATTCCCCGACGGGGAGCCA	3_tRF	29.004	0	0	14.004	15.996	17.004	24	27	17.004	131.004	51	14.004	187.008	36	101.004	11.004	14.004	12	104.004	300.996	56.004	24	53.004	29.004
tRF#20-YDLBRY73	TTAACCGAAAGGTTGGTGGT	i-tRF	11	0	0	0	23	193	200	171	246	20	70	0	26	15	43	97	16	44	0	0	0	32	35	25
tRF#28-7EMQ18Y3E7D8	GTGATCGTATAGTGGTTAGTACTCTGCG	5_tRF	23.004	21.996	0	0	18.999	39.996	84.996	131.004	98.001	68.004	71.001	0	92.997	75.996	50.004	117	28.998	116.001	131.004	0	0	36	25.002	32.004
tRF#31-QNR8VP9NFQFYD	GCGTTGGTGGTATAGTGGTTAGCATAGCTGC	5_tRF	29	23	0	14	32	88	92	186	69	0	0	0	0	0	50	195	16	142	90	0	0	139	65	19
tRF#34-RPM8309MUKLYIE	GGTAGCGTGGCCGAGTGGTCTAAGGCGCTGGATT	5_tRF	22	19	0	0	0	33	51	69	42	0	0	0	0	0	340	328	132	105	0	27	12	40	26	0
tRF#21-LNKSEK51B	CGATTCCCCGACGGGGAGCCA	3_tRF	20.004	0	0	93.996	44.004	84	90	101.004	98.004	17.004	30	0	72	39.996	33	48	60	29.004	0	224.004	0	45	87	17.004
tRF#23-R9JP9P9NDD	GGTTCCATAGTGTAGTGGTTATC	5_tRF	87	11.001	0	0	29.001	21.999	38.001	26.001	36	0	0	0	0	0	99.999	126.999	27	122.001	386.001	21	0	66.999	99	26.001
tRF#23-9MV47P59D9	TGGTCTAGTGGTTAGGATTCGGC	i-tRF	60	0	0	0	41	38	75	172	85	0	0	12	0	0	127	133	36	72	207	27	0	49	28	61
tRF#22-P4R8YP9LL	GCATGGGTGGTTCAGTGGTAGA	5_tRF	31	0	0	11	41	59	91	81	94	19	282	186	32	49	65	35	27	16	37	0	0	27	14	25
tRF#50-PS5U8918W8RV1I8B3WFY	GCCCGGATGATCCTCAGTGGTCTGGGGTGCAGGCTTCAAACCTGTAGCTG	5_tRF	0	12	63	18	0	0	0	11	54	0	0	0	63	0	490	72	0	0	0	40	297	19	0	80
tRF#28-KY7343RX6ND4	CCCTGGTGGTCTAGTGGTTAGGATTCGG	5_tRF	62	12	0	0	97	19	41	135	92	0	0	0	0	0	129	162	95	62	103	86	38	27	37	22
tRF#26-34HWH3RXSID	CCGTGATCGTATAGTGGTTAGTACTC	5_tRF	10.998	0	0	11.997	0	36.999	19.998	125.001	59.004	0	38.997	98.001	38.997	81	215.001	75.996	52.002	97.002	233.001	0	0	10.998	12.996	0
tRF#30-JY7383RPD9W1	CATTGGTGGTTCAGTGGTAGAATTCTCGCC	5_tRF	36	13	0	21	43	19	19	97	28	33	53	0	26	0	313	249	38	61	135	16	0	17	0	0
tRF#19-PNR8YPJZ	GCATTGGTGGTTCAGTGGT	5_tRF	549	434	12	207	0	0	0	0	0	0	0	0	0	0	0	15	0	0	0	0	0	0	0	0
tRF#35-12Z4R95MKM9KX6	AGGGATTGTGGGTTCGAGTCCCATCTGGGGTGCCA	3_tRF	14	26	0	26	37	77	88	126	94	11	0	0	0	10	175	102	40	52	0	16	0	102	137	81
tRF#31-79MP9P9MH57SD	GTTTCCGTAGTGTAGTGGTCATCACGTTCGC	5_tRF	83	22	0	15	21	65	97	117	104	0	0	0	0	0	146	157	49	120	32	20	0	90	49	20
tRF#27-QNR8VP9NFQH	GCGTTGGTGGTATAGTGGTTAGCATAG	5_tRF	12	31	0	16	68	55	74	51	79	0	0	0	0	0	98	250	46	114	69	16	0	115	60	50
tRF#38-941QKS3W2VR008DZ	TGGTGAGTATCCCCGCCTGTCACGCGGGAGACCGGGGT	i-tRF	15	63	0	13	17	67	111	90	67	0	41	0	15	0	66	112	34	109	0	0	22	155	125	81
tRF#33-LSM1M3WE8SSPDX	CGCCGCGGCCCGGGTTCGATTCCCGGTCAGGGA	3_tRNA_halve	45	0	0	0	10.998	0	0	0	0	317.007	27	0	716.994	36	11.997	0	0	0	27	0	0	0	0	0
tRF#19-9N1EWJI5	TGGTTAGGATTCGGCGCTC	i-tRF	721	255	10	143	0	0	0	0	0	0	0	0	0	0	0	0	18	0	0	33	0	0	0	0
tRF#29-7EMQ18Y3E7IN	GTGATCGTATAGTGGTTAGTACTCTGCGT	5_tRF	0	19.998	0	0	18	0	0	170.001	72	72.999	30.996	18	45.999	27	243	133.002	23.004	24.003	234.999	10.998	0	15.003	16.002	0
tRF#19-VBY9PY11	TAGAATTCTCGCCTGCCAC	i-tRF	151	551	17	306	0	15	0	10	13	0	0	0	0	0	0	23	0	52	0	0	0	28	0	0
tRF#20-NB8PLML3	CTGAATCCAGCGATCCGAGT	i-tRF	0	38	0	0	52	71	85	94	80	0	37	0	10	0	11	187	18	145	29	37	0	166	75	28
tRF#50-897PVP941QKS3W2VR008	TCCTCGTTAGTATAGTGGTGAGTATCCCCGCCTGTCACGCGGGAGACCGG	5_tRF	0	27	342	44	0	0	0	0	84	0	0	0	330	0	33	12	0	0	0	13	197	0	0	80
tRF#23-YUYRLHR0D2	TTCGATTCCCCGACGGGGAGCCA	3_tRF	24	0	0	69	0	45.996	62.004	59.004	29.004	12	0	24.996	12.996	0	31.004	28.992	68.004	56.004	0	467.004	0	33.996	108	24.996
tRF#29-PS5U8918W820	GCCCGGATGATCCTCAGTGGTCTGGGGTG	5_tRF	46	0	0	0	0	0	0	0	0	0	42	0	44	17	291	416	69	108	52	13	0	27	21	11
tRF#24-QNR8VP9NEU	GCGTTGGTGGTATAGTGGTTAGCA	5_tRF	34	13	0	12	18	59	58	50	80	0	0	0	0	0	42	193	44	208	128	0	0	124	53	40
tRF#20-QNR8VP9N	GCGTTGGTGGTATAGTGGTT	5_tRF	92	0	0	20	40	129	40	101	63	0	14	0	0	0	74	97	57	49	283	14	0	36	32	14
tRF#36-PW5SVP9N15WV7W0	GCCGTGATCGTATAGTGGTTAGTACTCTGCGTTGTG	5_tRNA_halve	16.002	19.998	0	0	12.996	12.996	14.004	57.996	26.001	139.995	271.008	63.999	81.999	88.002	250.992	45.999	23.004	28.998	0	0	0	0	0	0
tRF#24-PS5U8918JP	GCCCGGATGATCCTCAGTGGTCTG	5_tRF	37	11	0	12	0	0	0	0	0	16	20	25	23	0	321	320	47	131	44	23	0	27	66	19
tRF#27-476YQSL4WWQ	CTCCTGGCTGGCTCGCGATGTCTGTTT	3_U_tRF	50	0	0	10	21	35	15	0	15	0	0	0	0	0	640	134	39	179	0	0	0	0	0	0
tRF#24-7SIR3DR2I2	GTTCGATTCCCCGACGGGGAGCCA	3_tRF	27	0	0	42.996	12.996	71.004	96.996	51	42.996	9.996	0	12.996	0	0	30	48	91.996	36	0	306	0	45.996	159.996	42.996
tRF#22-RKVP4P9LL	GGGGGTATAGCTCAGTGGTAGA	5_tRF	75.999	28	0	0	25.998	14	0	17.997	23.002	0	0	0	0	0	199.003	145.999	208.999	158.998	101.997	28	0	37.002	27.997	28
tRF#32-5DMKYOYRLHR0J	GAGACCGGGGTTCAATTCCCCGACGGGGAGCC	3_tRF	33	0	10	0	22	0	0	37	12	16	0	0	11	0	37	0	22	0	214	586	110	0	0	0
tRF#25-R8WP9N1EWJ	GGTGGTCTAGTGGTTAGGATTCGGC	i-tRF	60	18	0	0	38	29	45	86	123	0	0	0	0	0	117	76	130	95	102	45	18	39	48	41
tRF#22-RPM830MMO	GGTAGCGTGGCCGAGCGGTCTA	5_tRF	61.002	14.004	0	33.003	102.996	48.996	37.998	54.999	74.997	60.003	155.999	51.003	72	99	10.998	46.998	23.004	60.003	0	27.999	0	32.004	27	14.004
tRF#25-QNR8VP9NFQ	GCGTTGGTGGTATAGTGGTTAGCAT	5_tRF	24	10	0	0	21	60	62	39	53	0	0	0	0	0	85	128	90	169	270	11	0	37	31	13
tRF#31-MXSL735L8RPYE	CGTTAGTATAGTGGTGAGTATCCCCGCCTGT	5_tRNA_halve	15	11	0	0	18	0	11	15	29	0	0	0	0	0	155	126	341	233	43	27	23	23	28	0
tRF#20-K34ZMKQ4	CCAGTCTCTTCGGGGGCGTG	i-tRF	25.998	18.998	0	0	15.001	15.001	11.998	46.998	23.002	51.002	12.999	0	39.998	16.002	204.001	465.003	21	44.002	29.001	21	0	0	31.003	0
tRF#24-PS5P4PW3ES	GCCCGGATAGCTCAGTCGGTAGAG	5_tRF	70.002	75	0	37.998	61.002	22.998	25.002	76.998	67.998	19.998	10.002	0	22.002	37.002	43.002	189	16.002	52.998	223.998	0	0	19.002	18	0
tRF#21-RPM8309ME	GGTAGCGTGGCCGAGTGGTCT	5_tRF	0	22	0	0	73	186	40	97	121	0	0	0	0	0	77	277	36	44	74	0	0	14	17	10
tRF#23-YDLBRY730K	TTAACCGAAAGGTTGGTGGTTCG	i-tRF	87	42	0	0	17	40	63	66	76	0	0	0	0	0	101	201	28	118	18	0	0	120	70	40
tRF#28-3K76IR3DR2DV	CCGGGGTTCAATTCCCCGACGGGGAGCC	3_tRF	35	0	0	0	35	0	0	24	16	66	0	0	75	30	85	10	33	13	217	384	43	0	17	0
tRF#26-SL735L8RPYE	GTATAGTGGTGAGTATCCCCGCCTGT	i-tRF	14	18	0	0	35	16	20	32	14	0	14	28	0	0	193	232	96	132	67	82	0	44	30	14
tRF#20-HENBRSX3	ATAATCTGAAGGTCGTGAGT	i-tRF	26	0	0	0	0	69	131	110	112	0	0	0	0	0	60	150	49	145	0	0	0	97	88	38
tRF#39-79MP9P9NH57S36F8	GTTTCCGTAGTGTAGTGGTTATCACGTTCGCCTCACACG	5_tRNA_halve	59.004	81	0	0	54.999	47.997	125.001	127.998	45	0	0	0	0	0	182.003	103.986	33.003	33.993	0	0	76.005	67.995	35.001	0
tRF#28-897PVP941QDJ	TCCTCGTTAGTATAGTGGTGAGTATCCC	5_tRF	92	0	0	22	51	56	36	164	75	0	38	0	0	0	83	51	69	61	127	16	0	53	38	26
tRF#23-F91SS2P4DX	AGCTCAGTCGGTAGAGCATGGGA	i-tRF	20	0	0	0	14	49	83	147	125	0	0	0	0	0	54	156	0	175	16	0	0	111	72	34
tRF#33-JY7383RPD9W10M	CATTGGTGGTTCAGTGGTAGAATTCTCGCCTGC	5_tRNA_halve	0	0	0	0	50	17	23	116	40	0	14	0	0	0	255	253	70	165	0	12	0	18	22	0
tRF#24-PW5SVP9NFB	GCCGTGATCGTATAGTGGTTAGTA	5_tRF	25.002	18	0	0	19.998	71.001	0	54.999	62.001	12.996	0	14	24.003	36	176.004	36.999	12.996	104.004	376.003	0	0	0	9.999	0
tRF#39-K76KM87SDR29NDE2	CCCCTGGAGGCGTGGGTTCGAATCCCACTCCTGACACCA	3_tRF	157.003	15.001	0	0	21	0	22.001	22.001	10.003	0	0	0	0	0	226.998	113.001	70	89.999	0	11.998	103.999	39.998	119.994	29.001
tRF#33-623K7SIR3DR2DV	GGAGACCGGGGTTCGATTCCCCGACGGGGAGCC	3_tRF	18.996	0	0	18	18	0	0	33.996	9.996	64.008	0	0	11.004	0	0	11.004	0	9.996	138	597.996	108.996	0	9.996	0
tRF#23-Z8SSFK8SDZ	TTTGGGTCCGAGAGGTCCCGGGT	i-tRF	17	18	0	0	43	31	46	116	94	0	0	0	0	0	0	300	17	106	0	15	0	92	83	69
tRF#28-J09HJHOJ7IDY	CAGAGTGGCGCAGCGGAAGCGTGCTGGG	5_tRF	0	0	0	0	64.998	41.004	78.003	90	87.003	68.994	54.999	0	205.011	39.006	28.998	128.007	18.999	81	0	15.003	0	11.997	18	12.996
tRF#27-6XQ6S8V0JUL	GGCTAGCTCAGTCGGTAGAGCATGAGA	5_tRF	25.998	19.002	0	16.998	49.002	46.998	55.998	97.998	127.002	25.002	25.998	13.002	39	40.002	49.998	85.998	22.998	159	31.002	16.002	0	43.998	51	0
tRF#18-VIJMRP9	TAGCTCAGTCGGTAGAGC	i-tRF	0	0	0	0	0	0	66	16	40	82	131	100	52	218	39	80	50	75	13	46	0	0	27	0
tRF#24-9MV47P59I8	TGGTCTAGTGGTTAGGATTCGGCG	i-tRF	23	18	0	0	53	25	40	97	39	0	0	24	10	0	139	143	35	52	204	52	0	37	21	19
tRF#20-3WOZZMNZ	CCTGTGACTTTTGTCCTTTT	3_U_tRF	19	0	0	16	30	31	11	19	15	0	0	0	0	0	87	72	64	240	82	27	0	135	137	45
tRF#24-SP5830MM2S	GTCAGGATGGCCGAGCGGTCTAAG	5_tRF	34.002	27	0	19.998	54	28.998	39.996	41.004	32.004	0	0	0	0	0	53.001	351.999	34.002	64.998	11.997	24.003	0	117.999	56.997	34.002
tRF#41-8HM2OSRNLNKSEK51B	TCACGCGGGAGACCGGGGTTCGATTCCCCGACGGGGAGCCA	3_tRNA_halve	30.996	21	12.996	144.996	81	72	281.988	132.996	75	0	32.004	0	15.996	0	62.004	0	15	0	0	46.992	0	0	0	0
tRF#30-P4R8YP9LON4V	GCATGGGTGGTTCAGTGGTAGAATTCTCGC	5_tRF	15	18	0	22	20	16	20	66	73	77	160	280	83	63	0	18	0	30	16	0	0	12	12	14
tRF#29-1EWJQ72S3HIJ	AGGATTCGGCGCTCTCACCGCCGCGGCCC	i-tRF	31	28	0	0	16	58	90	185	262	0	0	0	0	0	14	79	0	105	0	29	0	69	44	0
tRF#23-Q1Q89P9L02	GCGCCGCTGGTGTAGTGGTATCA	5_tRF	130	0	0	0	19	11	21	25	12	0	0	0	0	0	189	203	45	140	37	14	0	40	97	24
tRF#25-6XQ6S8V0JU	GGCTAGCTCAGTCGGTAGAGCATGA	5_tRF	45	0	0	31.002	39	25.998	15	25.998	22.998	33	43.998	121.002	25.002	69	97.002	64.998	90	91.998	25.002	24	0	49.998	66	0
tRF#20-S3M8309N	GTAGTCGTGGCCGAGTGGTT	5_tRF	39	68	0	18	28	22	10	20	15	0	15	0	26	0	170	403	61	74	26	0	0	10	0	0
tRF#22-1S91547O4	AGTCGTGGCCGAGTGGTTAAGG	5_tRF	11	0	0	0	36	23	26	66	43	31	83	32	36	61	72	109	163	61	15	48	0	35	50	0
tRF#21-32Q86N7KE	CCGGAGCTGGGGATTGTGGGT	i-tRF	21	17	0	0	10	35	57	37	64	0	0	0	0	0	71	226	31	183	25	10	0	129	68	17
tRF#21-70VR3196D	GTGAGTATCCCCGCCTGTCAC	i-tRF	22	12	0	25	16	73	70	102	119	0	0	0	0	0	56	80	51	87	0	17	0	137	81	37
tRF#29-79MP9P9MH525	GTTTCCGTAGTGTAGTGGTCATCACGTTC	5_tRF	37	12	0	0	23	0	20	35	20	0	0	0	0	0	362	171	58	136	100	10	0	0	0	0
tRF#21-73FEWS3VD	GTGGTAGAATTCTCGCCTGCC	i-tRF	12	18	0	13	16	113	84	116	99	0	0	0	0	10	26	121	0	75	0	17	0	159	70	33
tRF#21-J4S2I7L70	CAGTGGTAGAATTCTCGCCTG	i-tRF	11	37	0	0	0	20	27	135	89	12	0	0	20	65	27	84	66	252	0	12	0	41	70	10
tRF#30-LBLM8D4N4OEZ	CGAAACGATCTCAACCTATTCTCAAACTTT	5_U_tRF	31	19	0	11	31	107	465	53	122	0	0	12	0	0	34	10	0	56	0	0	0	26	0	0
tRF#32-MUWLV47PU9XWP	CGTGATCGTATAGTGGTTAGTACTCTGCGTTG	5_tRNA_halve	18.999	19.998	14.004	0	35.001	36.999	18	191.997	95.004	37.998	162	46.998	61.002	34.002	68.004	45.999	26.001	23.004	0	16.002	11.997	0	9.999	0
tRF#28-86J8WPMN1E0J	TCCCACATGGTCTAGCGGTTAGGATTCC	5_tRF	49	23	0	20	44	12	16	48	49	0	0	0	0	0	120	80	56	202	166	17	0	22	47	0
tRF#21-23KYY8Q1B	CAAGTCCCTGTTCGGGCGCCA	3_tRF	170	0	0	82	11	145	189	179	155	0	0	0	0	0	0	0	15	0	0	24	0	0	0	0
tRF#20-897PVP94	TCCTCGTTAGTATAGTGGTG	5_tRF	134	16	0	40	22	34	46	46	44	0	0	0	0	0	26	98	39	104	219	13	0	22	20	47
tRF#26-QP4PW3FJI0B	GCTAGCTCAGTCGGTAGAGCATGAGA	i-tRF	36	18	0	16	63	31	29	65	132	18	50	25	21	22	57	51	49	140	11	22	0	39	57	15
tRF#21-NKPYNRSZE	CTGGGGCCTGCTTCCGTCTTT	3_U_tRF	103	0	0	0	34	0	0	150	0	0	0	0	0	117	112	124	16	62	27	0	0	0	26	194
tRF#27-PYRP4PW3FJI	GCCTGGGTAGCTCAGTCGGTAGAGCAT	5_tRF	27	12	11	23	44	16	0	11	22	29	23	283	23	35	44	46	43	110	0	52	0	30	80	0
tRF#22-9N1EWJQ72	TGGTTAGGATTCGGCGCTCTCA	i-tRF	15	15	0	0	23	63	54	140	224	0	0	0	0	0	37	77	29	110	0	13	0	86	46	32
tRF#30-87R8WP9I1EWJ	TCCCTGGTGGTCTAGTGGCTAGGATTCGGC	5_tRF	195	43	0	19	24	36	41	85	82	0	0	0	0	0	123	156	0	74	59	0	0	0	10	15
tRF#30-RKVP4P9L5FZU	GGGGGTATAGCTCAGTGGTAGAGCATTTGA	5_tRF	13	0	0	0	24	19	23	0	38	11	0	20	0	0	60	66	91	280	11	13	0	144	81	67
tRF#28-MUWLV47PU90M	CGTGATCGTATAGTGGTTAGTACTCTGC	5_tRF	16.002	10.998	0	0	25.002	41.004	64.998	177.003	137.997	10.998	21.996	0	41.004	44.001	89.001	50.004	0	90	75.996	0	0	46.998	15.003	0
tRF#28-R9JP9P9NH50D	GGTTCCATAGTGTAGTGGTTATCACGTC	5_tRF	158	0	0	0	29	11	18	38	24	0	0	0	0	0	61	134	26	46	309	12	0	25	43	23
tRF#33-5DMKYOYRLHR0D2	GAGACCGGGGTTCAATTCCCCGACGGGGAGCCA	3_tRF	11	0	0	13	0	48	82	78	51	0	0	0	0	0	22	0	43	12	0	376	21	42	90	65
tRF#28-944EBV2KWHDZ	TGGTGCTAATAACGCCAAGGTCGCGGGT	i-tRF	15	16	0	13	19	28	55	31	41	0	0	0	0	0	31	274	16	115	0	44	0	140	88	19
tRF#24-9V881X3SKQ	TGTGCTCCGGAGTTACCTCGTTTT	3_U_tRF	66	32	0	21	27	182	164	137	201	0	0	0	13	0	0	36	24	36	0	0	0	0	0	0
tRF#19-RV50SRIZ	GGTGCGAGAGGTCCCGGGT	i-tRF	42	41	0	31	0	47	38	72	90	0	0	0	0	0	40	278	12	43	0	0	0	105	39	50
tRF#20-59KUMKF6	GATTCCCCGACGGGGAGCCA	3_tRF	48.996	0	0	38.004	21	36.996	53.004	45.996	24	0	0	12	12.996	0	20.004	51.996	42	78	0	219	0	42	123.996	57.996
tRF#30-3KMB0F4BBM3Z	CCGGGCGGAAACACACTAAAAAATCCCTTT	3_U_tRF	14	0	0	0	0	0	0	0	0	0	0	0	0	0	795	55	0	57	0	0	0	0	0	0
tRF#48-PW5SVP9N15WV7W6SJFV	GCCGTGATCGTATAGTGGTTAGTACTCTGCGTTGTGGCCGCAGCAACC	5_tRF	0	0	48.996	0	0	0	0	0	0	0	318.996	0	477	21.996	54	0	0	0	0	0	0	0	0	0
tRF#23-08R959KUD4	ACCGGGGTTCGATTCCCCGACGG	i-tRF	57	12	0	10	0	0	0	0	0	0	0	0	0	0	66	184	58	28	113	194	63	32	35	68
tRF#24-3K7SIR3DIY	CCGGGGTTCGATTCCCCGACGGGG	3_tRF	57	0	0	0	16	0	0	17	0	0	13	0	0	0	61	227	13	30	78	189	91	11	22	92
tRF#32-R9JP9P9NH5SY3	GGTTCCATAGTGTAGTGGTTATCACGTCTGCT	5_tRF	19	23	0	0	27	31	25	74	47	0	0	0	0	0	161	126	0	71	220	38	0	24	29	0
tRF#34-RPM830MMUKLYIE	GGTAGCGTGGCCGAGCGGTCTAAGGCGCTGGATT	5_tRF	0	11	0	0	0	22	34.997	66.004	47.002	0	0	0	0	0	259	313.001	53.003	56	0	50.997	0	0	0	0
tRF#30-R29P4P9L5HJV	GGGGATGTAGCTCAGTGGTAGAGCGCATGC	5_tRF	24.997	36.001	0	16.002	15.001	0	44.002	53.998	66.997	0	0	0	0	0	92.001	186.998	14	192.997	0	0	0	64.001	80.997	22.001
tRF#32-F1R38E8RO86J2	AGACCGGGGTTCAATTCCCCGACGGGGAGCCA	3_tRF	0	0	0	20	0	34	90	103	55	0	0	0	0	0	29	0	51	0	0	372	18	27	58	48
tRF#22-34HWH3RXN	CCGTGATCGTATAGTGGTTAGT	5_tRF	0	14.004	0	11.997	36	142.002	0	106.002	84.996	0	0	0	0	16.002	81.999	26.001	0	44.001	297.999	0	0	26.001	17.001	0
tRF#26-18YOY63ZMJ0	AGTGGTTCAATTCCACCTTTCGGGCG	3_tRF	0	0	0	17	0	36	33	0	15	289	30	23	11	13	11	80	0	44	0	31	0	47	222	0
tRF#28-79MP9P9MH50E	GTTTCCGTAGTGTAGTGGTCATCACGTT	5_tRF	41	0	0	10	13	11	22	37	13	0	0	0	41	0	223	152	29	121	128	19	0	0	28	12
tRF#27-1IK34ZMKQ44	AGGCTCCAGTCTCTTCGGGGGCGTGGG	i-tRF	0	16.002	0	10.997	10.997	0	10.003	0	0	131.999	177.002	87.997	206.997	88.998	43.001	106.001	0	10.003	0	0	0	0	0	0
tRF#33-6N7KYUSRHYR4D2	GGATTGTGGGTTCGAGTCCCATCTGGGGTGCCA	3_tRF	13	0	0	13	11	94	33	38	29	0	13	0	0	0	110	88	48	45	0	87	0	79	119	79
tRF#23-79MP9PMNDD	GTTTCCGTAGTGTAGCGGTTATC	5_tRF	77	0	0	0	31	24	33	75	33	0	0	0	0	0	160	103	21	117	134	0	0	29	34	15
tRF#26-9NJ4S2I7L70	TGGTTCAGTGGTAGAATTCTCGCCTG	i-tRF	0	30	0	0	10	39	60	75	91	0	0	0	16	10	17	105	106	230	0	0	0	51	45	0
tRF#19-12RXXN0W	AGGGAGGTTATGATTAACT	3_U_tRF	0	0	0	0	0	31	11	11	13	82	67	88	263	194	0	17	13	34	0	0	0	38	10	0
tRF#28-94SX73V2Y8DM	TGGTGGTCTAGTGGTTAGGATTCGGCGC	5_tRF	19	16	0	0	51	56	62	80	167	0	0	0	0	0	100	74	18	58	42	17	0	44	37	28
tRF#22-SP5830MMO	GTCAGGATGGCCGAGCGGTCTA	5_tRF	59.004	18	0	17.001	68.004	45.999	42.003	52.002	17.001	0	35.001	0	0	0	72	84.996	18.999	123.003	10.998	14.004	0	91.998	71.001	21.996
tRF#38-L85J3KYUYR66IFD2	CGCGGGAGGCCCGGGTTCGATTCCCGGCCAATGCACCA	3_tRNA_halve	79.998	0	0	0	10.002	0	27	70.998	21.996	46.998	51	0	208.002	72	103.998	51	0	21	12	0	12	0	70.998	0
tRF#37-LSM1M3WE8SSP6D2	CGCCGCGGCCCGGGTTCGATTCCCGGTCAGGGAACCA	3_tRNA_halve	99.999	0	0	0	21.996	18.999	9.999	38.997	12.996	64.998	21.996	15.003	149.004	14.004	89.001	24.003	16.002	50.004	108	27.999	0	20.997	54	0
tRF#30-94SX73V2Y8L9	TGGTGGTCTAGTGGTTAGGATTCGGCGCTC	5_tRNA_halve	0	19	0	0	35	17	36	85	79	0	0	0	0	0	146	47	162	80	35	51	17	16	28	0
tRF#24-OUR8309N0Y	GACGAGGTGGCCGAGTGGTTAAGG	5_tRF	32.998	45.003	0	22.001	12.999	17.997	11.998	30.002	81.998	23.002	0	23.002	0	45.003	152	147	23.002	42	29.001	36.001	0	35	18.998	22.001
tRF#21-LJK578Q1B	CGAGCCCCACGTTGGGCGCCA	3_tRF	92.002	0	0	91.999	37	89	102.998	156.997	141.997	0	31	0	0	0	0	0	22.996	0	0	40	0	42.998	0	0
tRF#31-I89NJ4S2I7L70	ATTGGTGGTTCAGTGGTAGAATTCTCGCCTG	5_tRNA_halve	11	20	0	0	54	21	24	92	56	30	29	0	48	54	79	54	50	176	0	13	0	19	18	0
tRF#23-ZLB6R3LU0E	TTGTAAACCAGGGGTCGCGAGTT	i-tRF	15	0	0	0	10	59	49	63	74	0	0	0	0	0	55	152	0	76	0	0	0	115	65	115
tRF#23-QP4PW3FJD0	GCTAGCTCAGTCGGTAGAGCATG	i-tRF	32	16	0	25	57	41	32	90	28	36	22	139	19	37	41	44	31	53	26	15	0	26	37	0
tRF#23-KB8JLHZV0Q	CCAAATCAGCCGACGTTTGCTTT	3_U_tRF	69	15	0	15	82	44	17	10	26	0	0	0	0	0	316	114	30	98	0	0	0	0	11	0
tRF#34-86J8WPMN1E8Y2Q	TCCCACATGGTCTAGCGGTTAGGATTCCTGGTTT	5_tRNA_halve	18	13	0	0	12	14	25	38	16	0	0	0	0	0	138	105	96	117	219	32	0	0	0	0
tRF#25-PSQP4PW3FJ	GCCCGGCTAGCTCAGTCGGTAGAGC	5_tRF	0	9.999	0	0	0	0	45.999	68.004	68.994	0	154.998	34.002	0	10.998	0	399.006	0	16.002	0	0	0	33.003	0	0
tRF#31-D9W1X6L85J3KE	AATTCTCGCCTGCCACGCGGGAGGCCCGGGT	i-tRF	0	19	0	0	0	35	44	67	48	15	0	0	29	0	36	225	13	118	0	0	0	117	48	19
tRF#21-9N1QKS3WD	TGGTTAGTATCCCCGCCTGTC	i-tRF	14	12	0	0	21	89	95	115	176	0	0	0	0	0	22	35	83	48	0	11	0	40	44	28
tRF#19-VIJNRPEU	TAGCTCAGTTGGTAGAGCA	i-tRF	0	0	0	0	20	0	73	184	0	33	26	100	45	55	63	25	46	141	0	0	0	10	10	0
tRF#25-7EMQ18Y3E7	GTGATCGTATAGTGGTTAGTACTCT	5_tRF	16.002	10.998	0	18	54	33.003	24.003	133.002	89.001	0	42.993	0	0	30.996	111.996	44.001	28.998	0	156.996	12.996	0	0	24.003	0
tRF#35-897PVP9N1QKS3W	TCCTCGTTAGTATAGTGGTTAGTATCCCCGCCTGT	5_tRNA_halve	0	0	13	0	24	13	39	25	38	0	0	0	0	0	147	64	188	91	109	16	29	15	18	0
tRF#27-R8WP9N1EWJM	GGTGGTCTAGTGGTTAGGATTCGGCGC	i-tRF	16	0	0	0	14	0	14	38	73	0	0	0	10	0	185	90	33	66	108	118	0	24	20	14
tRF#22-W0K672052	TCGAGCCCCAGTGGAACCACCA	3_tRF	30	15	0	9.999	24	99.001	93	102.999	84.999	0	11.001	0	0	24	27.999	62.001	0	65.001	0	48	0	57	50.001	18.999
tRF#30-HRL7S5QKF1R3	ATCCCCGCCTGTCACGCGGGAGACCGGGGT	i-tRF	0	18	0	0	11	21	42	40	42	66	139	97	107	102	0	36	10	29	0	0	0	29	17	16
tRF#25-9NJ4S2I7L7	TGGTTCAGTGGTAGAATTCTCGCCT	i-tRF	13	0	0	0	15	11	11	30	31	0	0	0	0	0	184	169	86	56	121	25	0	40	18	12
tRF#29-08R9D9KUMKEV	ACCGGGGTTCAATTCCCCGACGGGGAGCC	3_tRF	36	0	0	0	32	11	0	15	14	19	0	0	43	28	82	0	11	0	180	305	30	0	13	0
tRF#31-87R8WP9I1EWJ0	TCCCTGGTGGTCTAGTGGCTAGGATTCGGCG	5_tRF	88	54	0	11	31	21	62	140	101	0	0	0	0	0	59	185	10	29	27	0	0	0	0	0
tRF#50-RPM830MMUKLY5Z1IK34Z	GGTAGCGTGGCCGAGCGGTCTAAGGCGCTGGATTTAGGCTCCAGTCTCTT	5_tRF	0	17	69	61	0	10	0	0	177	0	0	0	204	0	66	19	0	11	0	0	109	18	0	56
tRF#27-RK9P4P9L5HK	GGGGGTGTAGCTCAGTGGTAGAGCGCG	5_tRF	0	19.002	0	10.002	52.002	33	10.002	13.002	0	0	28.998	0	0	0	148.002	262.002	61.998	139.002	0	0	0	19.002	19.998	0
tRF#32-897PVP9N1QKSJ	TCCTCGTTAGTATAGTGGTTAGTATCCCCGCC	5_tRF	37	0	0	0	20	24	0	55	50	0	36	60	0	0	126	73	43	86	166	10	0	14	15	0
tRF#18-8SRZMFD2	TCCCGGGTTTCGGCACCA	3_tRF	17.001	0	0	9.999	198.999	90.009	63.999	96.003	72.999	0	0	0	0	0	36	37.008	11.997	18.999	73.998	17.001	0	11.997	44.991	10.998
tRF#22-FP18LPMBM	AGCAGAGTGGCGCAGCGGAAGC	5_tRF	131	0	0	0	0	0	0	23.004	10.998	0	0	0	0	0	48.997	199.002	46.001	72.004	222.996	0	0	9.999	35.002	11.997
tRF#24-RPM830MM2S	GGTAGCGTGGCCGAGCGGTCTAAG	5_tRF	63.999	26.001	0	54.999	131.004	27.999	25.002	18	27.999	19.998	45.999	62.001	27.999	41.004	32.004	77.004	21.996	38.997	0	20.997	0	16.002	14.004	14.004
tRF#23-M3WE8SSPDX	CGGGTTCGATTCCCGGTCAGGGA	3_tRF	15.003	0	0	0	0	0	0	0	0	213.003	0	0	512.001	20.997	17.001	0	0	0	27	0	0	0	0	0
tRF#22-8LHYD3MUN	TCATAATCTGAAGGTCGTGAGT	i-tRF	34	11	0	0	0	63	70	87	57	0	12	0	0	0	46	111	12	109	0	0	0	110	52	29
tRF#25-38NJWHIM9Z	CCTGGCTGGCTCGCGATGTCTGTTT	3_U_tRF	30	0	0	0	41	41	0	17	14	0	0	0	0	0	351	146	54	106	0	0	0	0	0	0
tRF#24-R718YKISIM	GGTCTAGTGGTTAGGATTCGGCGC	i-tRF	0	0	0	11	10	21	13	34	17	0	0	0	0	0	178	59	60	19	97	193	18	27	28	13
tRF#25-MB0F4BBM3Z	CGGAAACACACTAAAAAATCCCTTT	3_U_tRF	10	0	0	11	0	10	0	0	0	0	0	0	0	0	497	105	31	133	0	0	0	0	0	0
tRF#22-U45O6QJ15	TAATGGATAAGGCATCAGCCTC	i-tRF	0	12	0	0	55	29	11	123	84	0	0	0	0	0	84	185	61	64	0	44	0	18	22	0
tRF#23-N1EH6KK80E	CTGCCACGCGGGAGGCCCGGGTT	i-tRF	13	0	0	0	39	54	75	94	89	0	11	0	0	0	21	148	0	108	10	0	0	69	43	16
tRF#23-Z3R918VB05	TTGGTGGTTCAGTGGTAGAATTC	5_tRF	0	20	0	23	0	41	61	71	36	19	80	0	51	25	18	62	43	87	0	0	0	81	41	30
tRF#22-94SX73V2Q	TGGTGGTCTAGTGGTTAGGATT	5_tRF	41	17	0	0	0	32	25	75	102	0	0	0	0	0	52	51	99	107	55	24	0	34	41	30
tRF#22-6YQSL4WWQ	GGCTGGCTCGCGATGTCTGTTT	3_U_tRF	36	0	0	0	28	278	11	33	55	0	0	0	0	0	150	97	32	58	0	0	0	0	0	0
tRF#29-PSQP4PW3FJF4	GCCCGGCTAGCTCAGTCGGTAGAGCATGG	5_tRF	20.001	27	0	9.999	30.999	29.001	39.999	222	96.999	0	0	0	0	20.001	21.999	124.002	0	66	12	0	0	32.001	23.001	0
tRF#26-MUWLV47PU9E	CGTGATCGTATAGTGGTTAGTACTCT	5_tRF	26.001	0	0	0	38.997	28.998	18	108.999	71.001	17.001	0	48.996	21.996	24.003	89.001	25.002	35.001	45	131.004	0	0	18.999	24.003	0
tRF#29-R9JP9PMNH523	GGTTCCATAGTGTAGCGGTTATCACGTCT	5_tRF	47	17	0	12	81	65	59	160	109	0	0	14	0	0	65	35	51	37	17	0	0	0	0	0
tRF#26-MI7O3B1NR8E	CGGCTGTTAACCGAAAGGTTGGTGGT	i-tRF	15	23	0	0	14	67	61	72	121	0	13	0	12	0	50	114	0	54	0	0	0	101	18	31
tRF#34-QNR8VP9NFQFY1Q	GCGTTGGTGGTATAGTGGTTAGCATAGCTGCCTT	5_tRNA_halve	0	12	0	0	0	17	67	72	31	0	0	0	0	0	57	64	126	218	74	10	0	0	12	0
tRF#27-R3WE8RO86J2	GGGGTTCGATTCCCCGACGGGGAGCCA	3_tRF	0	0	0	26.004	12	103.008	137.004	21.996	38.004	36.996	0	0	0	15	0	0	50.004	27.996	0	99	0	50.004	116.004	21.996
tRF#33-RQ59WIZKXU53DJ	GGTATGATTCTCGCTTTGGGTGCGAGAGGTCCC	i-tRF	0	13.998	0	0	10.002	19.002	37.002	72.998	37.998	0	0	0	0	0	30	81.004	13.002	152.998	0	0	0	134.998	63	84
tRF#27-MP9P9NH57SJ	CGTAGTGTAGTGGTTATCACGTTCGCC	i-tRF	25	10	0	0	37	32	41	51	48	0	0	0	0	0	52	129	22	131	14	0	0	82	64	12
tRF#20-RPM830MM	GGTAGCGTGGCCGAGCGGTC	5_tRF	53.001	18	0	20.997	26.001	21.996	14.004	27	16.002	54.999	114.003	24.003	56.997	102.996	21.996	83.997	12.996	36.999	26.001	0	0	0	18	0
tRF#41-KHM26RRNLNK8KEP1B	CCACGCGGGAGGCCCGGGTTCGATTCCCGGCCAATGCACCA	3_tRNA_halve	64.998	147.996	18	51	30	25.998	52.998	28.998	31.002	0	64.002	0	49.002	0	85.002	0	40.998	15	0	0	13.002	16.998	13.998	0
tRF#22-RNLNKSEKL	GGGTTCGATTCCCCGACGGGGA	3_tRF	27.996	0	0	0	0	0	0	0	0	199	0	55.996	334.996	17.004	33	0	0	0	48	32.004	0	0	0	0
tRF#36-S4I7LZ93Q01M3KE	GTATGATTCTCGCTTTGGGTGCGAGAGGTCCCGGGT	i-tRF	0	67.002	0	31.002	0	28.998	64.998	109.002	66	0	0	10.002	0	10.002	48	66	12	33	0	0	0	94.998	45	58.002
tRF#22-78QHRYUIQ	GTTGGGCGCGGGTTGTAACTTT	3_U_tRF	155	0	0	0	17	41	0	0	0	0	0	0	0	0	213	141	20	125	0	11	0	0	19	0
tRF#19-VIJNRXH9	TAGCTCAGTTGGTTAGAGC	i-tRF	13	0	14	0	0	11	0	44	0	0	78	11	18	44	86	53	10	173	0	25	41	28	92	0
tRF#18-YR66IFD2	TTCCCGGCCAATGCACCA	3_tRF	0	0	0	9.999	0	33.003	9.999	19.998	27	110.997	145.998	33.003	163.998	112.995	0	0	0	17.001	0	0	0	27.999	28.998	0
tRF#34-VUY9QZR4L2RR1Y	TATGATTCTCGCTTTGGGTGCGAGAGGTCCCGGG	i-tRF	16.998	321.998	0	126	10.998	12	68.004	110.004	61.998	0	0	0	0	0	10.002	0	0	0	0	0	0	0	0	0
tRF#26-7343RX6NMHD	GTGGTCTAGTGGTTAGGATTCGGCGC	i-tRF	0	0	0	0	11	0	10	52	38	0	0	0	0	0	121	50	40	57	126	164	18	51	0	0
tRF#23-R3WE8RO8DX	GGGGTTCGATTCCCCGACGGGGA	3_tRF	33	0	0	0	0	0	0	0	0	224.004	56	10	295.004	0	49.996	0	0	0	30	36.996	0	0	0	0
tRF#21-73V2Y8L9E	GTGGTTAGGATTCGGCGCTCT	i-tRF	14	0	0	0	33	21	24	93	90	0	0	0	0	0	109	101	103	30	10	58	0	17	16	14
tRF#40-2VR0PSR9593J2426	CACGCGGGAGGCCCGGGTTCGATTCCCGGCCAATGCACCA	3_tRNA_halve	16.002	13.002	10.998	0	15	49.998	33	44.004	40.002	0	93.996	0	57.996	96.996	87	24	16.998	30	0	0	10.998	16.002	61.002	12
tRF#20-PSQP4PW3	GCCCGGCTAGCTCAGTCGGT	5_tRF	57.996	18	0	34.002	35.001	57	15.003	37.998	0	34.002	98.001	36	232.002	42.003	24.003	0	0	0	0	0	0	0	0	0
tRF#49-PW5SVP9N15WV7W6SJFE3	GCCGTGATCGTATAGTGGTTAGTACTCTGCGTTGTGGCCGCAGCAACCT	5_tRF	0	0	47.997	16.002	0	0	0	0	12.996	0	134.001	9.999	369.999	0	117.999	0	0	0	0	0	11.997	0	0	0
tRF#31-86J8WPMN1E8Y0	TCCCACATGGTCTAGCGGTTAGGATTCCTGG	5_tRF	48	37	0	24	16	0	22	39	37	0	0	0	0	0	62	169	18	126	99	10	0	11	0	0
tRF#36-3SY3H3RUSMKVNMB	CCTCGTTAGTATAGTGGTGAGTATCCCCGCCTGTCA	5_tRNA_halve	69	0	0	0	25	10	0	14	12	0	0	0	0	0	211	162	57	0	0	44	47	21	35	10
tRF#21-RKVP4P9L0	GGGGGTATAGCTCAGTGGTAG	5_tRF	12.999	0	0	0	0	0	0	0	25.998	0	0	0	0	0	127.001	100.002	234.997	104.006	16.002	33.999	0	12.999	21	26.999
tRF#25-R4VIJ4S2PF	GGGTGTAGCTCAGTGGTAGAGCACA	5_tRF	12	0	0	0	10	12	0	0	0	0	65	68	21	49	65	20	0	215	0	103	0	27	48	0
tRF#22-86J8WPMNH	TCCCACATGGTCTAGCGGTTAG	5_tRF	36	50	0	15	27	17	27	29	22	0	29	30	18	36	52	55	38	58	103	0	0	46	16	10
tRF#31-R9JP9P9NH5SYD	GGTTCCATAGTGTAGTGGTTATCACGTCTGC	5_tRF	24	16	0	0	0	53	69	71	69	0	0	0	0	0	37	76	10	63	37	0	0	107	62	19
tRF#27-R29P4P9L5H2	GGGGATGTAGCTCAGTGGTAGAGCGCA	5_tRF	24.997	10.997	0	12.999	0	0	11.998	0	0	0	0	0	0	0	87.003	173.999	38.997	208.999	0	15.001	0	45.003	59.003	22.001
tRF#23-D80L9RQ4DZ	AATGGACATATGTCCGCGTGGGT	i-tRF	0	26	0	10	43	20	119	126	98	0	0	0	0	0	0	55	31	53	0	0	0	45	23	58
tRF#27-3KYUYRR6RBJ	CCGGGTTCGATTCCCGGTCAGGGAACC	3_tRF	48.996	9.999	0	0	27	16.002	0	18	16.002	47.997	0	0	126	0	54.999	14.004	28.998	20.997	225	52.002	0	0	0	0
tRF#24-9NJ4S2I71V	TGGTTCAGTGGTAGAATTCTCGCC	i-tRF	12	0	0	0	0	43	54	97	61	0	0	0	0	0	36	115	14	136	18	0	0	68	37	14
tRF#28-J7KB8JLHZV0Q	CATCTCCAAATCAGCCGACGTTTGCTTT	3_U_tRF	52	15	0	16	23	11	25	0	16	0	0	0	0	0	337	105	22	80	0	0	0	0	0	0
tRF#24-F91SS2P4ER	AGCTCAGTCGGTAGAGCATGAGAC	i-tRF	27	21	0	0	12	44	83	157	88	20	26	0	16	47	10	35	0	49	20	0	0	30	17	0
tRF#25-6XQ6S8V0J8	GGCTAGCTCAGTCGGTAGAGCATGG	5_tRF	17.001	15.999	0	0	36.999	45.999	41.001	120.999	74.001	0	12.999	0	11.001	0	18	112.998	0	66.999	27.999	12	0	56.001	18	11.001
tRF#37-QNR8VP9LFQFY392	GCGTTGGTGGTATAGTGGTAAGCATAGCTGCCTTCCA	5_tRNA_halve	20	11	0	0	32	24	29	147	26	0	0	0	0	0	105	209	17	35	0	0	13	13	17	0
tRF#25-RW18V6XO59	GGTGTAGTGGTATCATGCAAGATTC	i-tRF	0	13	0	0	28	0	0	50	37	0	0	0	0	0	37	129	166	134	13	53	0	36	0	0
tRF#21-VIJNRPFQD	TAGCTCAGTTGGTAGAGCATC	i-tRF	0	0	0	0	0	16	11	0	134	49	54	14	22	72	46	18	32	96	37	0	0	24	70	0
tRF#25-PS5P4PW3FJ	GCCCGGATAGCTCAGTCGGTAGAGC	5_tRF	124.998	13.998	0	12	18	22.002	0	12	19.998	13.002	10.998	0	0	16.998	85.002	31.002	19.998	48	246	0	0	0	0	0
tRF#26-PS5P4PW3FJB	GCCCGGATAGCTCAGTCGGTAGAGCA	5_tRF	141	12	0	16.998	0	22.002	45	42	30	0	10.002	0	0	13.002	103.998	88.002	0	48.996	108	0	0	0	10.002	0
tRF#21-JY7383RPB	CATTGGTGGTTCAGTGGTAGA	5_tRF	40	0	0	14	0	28	25	38	47	0	16	56	10	0	111	47	0	59	82	19	0	39	35	24
tRF#27-RWF918V0LWM	GGTGTAGCTCAGTGGTAGAGCGCGTGC	5_tRF	13.002	0	13.998	27	0	19.998	61.002	19.002	37.002	0	0	0	0	0	25.998	105	97.998	103.002	0	0	0	60	61.002	43.998
tRF#21-3ZW0HI7ZE	CCTTTTCGAGATACTGTTTTT	3_U_tRF	18	10	0	13	54	41	65	38	72	0	0	0	0	0	87	25	97	79	0	0	0	87	0	0
tRF#26-7IDOL61MQKE	GTGCTAATAACGCCAAGGTCGCGGGT	i-tRF	10	20	0	0	0	30	33	37	34	0	0	0	0	0	18	176	0	105	0	18	0	99	73	30
tRF#25-RNLNK88KO1	GGGTTCGATTCCCGGTCAGGGAACC	3_tRF	51.003	0	0	0	26.001	12.996	9.999	12.996	11.997	38.997	0	0	119.997	29.997	79.002	11.997	20.997	33.003	178.002	45.999	0	0	0	0
tRF#29-86J8WPMN1EJ3	TCCCACATGGTCTAGCGGTTAGGATTCCT	5_tRF	42	10	0	10	27	17	18	46	19	0	0	0	0	0	87	73	17	120	170	0	0	0	14	10
tRF#22-RPM8309MO	GGTAGCGTGGCCGAGTGGTCTA	5_tRF	16	0	0	10	86	96	64	89	107	0	27	0	0	0	39	51	0	19	0	14	0	52	10	0
tRF#24-86J8WPMNEX	TCCCACATGGTCTAGCGGTTAGGA	5_tRF	27	18	0	10	22	14	27	41	36	62	55	0	17	68	56	40	27	32	79	0	0	19	14	15
tRF#20-PYXIZW3Z	GCCTGTGACTTTTGTCCTTT	3_U_tRF	22	0	0	0	22	0	11	0	15	0	0	0	0	15	35	34	21	27	399	12	0	17	34	12
tRF#23-SL735L8RDV	GTATAGTGGTGAGTATCCCCGCC	i-tRF	142	13	0	0	0	21	0	30	13	15	21	0	0	0	73	119	23	75	64	13	0	37	0	16
tRF#22-12RXXNBZQ	AGGGAGGTTATGATTAACTTTT	3_U_tRF	0	12	0	14	14	100	69	87	64	0	26	16	42	48	20	18	40	70	0	0	0	24	11	0
tRF#19-NKPY9WKQ	CTGGGGCCTGTGTGTTTTT	3_U_tRF	647	0	0	26	0	0	0	0	0	0	0	0	0	0	0	0	0	0	0	0	0	0	0	0
tRF#35-PS5U8918W8RV1I	GCCCGGATGATCCTCAGTGGTCTGGGGTGCAGGCT	5_tRF	13	18	0	0	0	0	0	0	0	48	155	26	51	24	139	113	11	33	17	14	10	0	0	0
tRF#26-R29P4P9L5HD	GGGGATGTAGCTCAGTGGTAGAGCGC	5_tRF	12	30	0	0	16	12	13	10	0	0	0	0	70	0	150	107	64	87	0	0	0	46	47	0
tRF#25-V4V47Q2WW1	TAGTGTAGTGGTTATCACGTTCGCC	i-tRF	0	14	0	0	17	22	59	56	60	0	0	0	0	0	78	80	62	60	34	18	0	73	31	0
tRF#32-5Y93W086W8RV2	GATTGTGGGTTCGAGTCCCATCTGGGGTGCCA	3_tRF	11	0	0	10	32	95	47	34	48	0	0	0	0	0	77	70	12	11	0	37	0	58	66	55
tRF#21-9NH57S36D	TGGTTATCACGTTCGCCTCAC	i-tRF	0	0	0	0	14	99	66	73	56	0	0	0	0	0	34	60	0	106	0	0	0	102	22	31
tRF#20-WR381H93	TCTCCCCTGGAGGCGTGGGT	i-tRF	10	11	0	0	12	36	23	20	22	11	11	0	32.996	21	27	111	13	93	0	28	0	95	62	24
tRF#28-6XQ6S8V0JUDR	GGCTAGCTCAGTCGGTAGAGCATGAGAC	5_tRF	34.002	15	0	0	0	19.998	43.998	115.002	112.002	21	37.002	28.002	34.002	18	33	33	0	96	0	0	0	22.002	0	0
tRF#25-P4R8YP9LON	GCATGGGTGGTTCAGTGGTAGAATT	5_tRF	66	38	0	0	15	0	22	43	51	33	20	0	21	35	68	28	56	65	60	0	0	12	28	0
tRF#31-XUK87SIRMJ6VB	TGCGACCCGGGTTCGATTCCCGGGCGGCGCA	3_tRF	85	0	0	0	0	0	0	12	10	134	46	0	222	15	25	46	0	18	30	0	0	0	16	0
tRF#23-R29P4P9LDS	GGGGATGTAGCTCAGTGGTAGAG	5_tRF	31	24	0	19	20	130	29	32	12	0	17	26	0	0	0	178	33	35	10	0	0	25	27	10
tRF#24-QP4PW3FJF4	GCTAGCTCAGTCGGTAGAGCATGG	i-tRF	0	15	0	12	47	35	46	130	104	0	0	0	0	0	38	110	0	62	0	0	0	28	30	0
tRF#34-6KM87SDR29NDE2	GGAGGCGTGGGTTCGAATCCCACTCCTGACACCA	3_tRF	96.999	11.998	0	10.997	0	0	17.003	21	0	0	0	0	0	0	86.002	133	40.999	115.003	0	0	10.997	32.998	65.002	15.001
tRF#21-BMFSENXZE	AAATCAGCCGACGTTTGCTTT	3_U_tRF	154	36	0	35	73	30	26	11	21	0	0	0	0	0	166	58	29	17	0	0	0	0	0	0
tRF#33-RX6NMH490VL8DJ	GGTTAGGATTCGGCGCTCTCACCGCCGCGGCCC	i-tRF	0	12	0	0	12	48	82	131	160	0	0	0	0	0	20	33	0	44	0	0	0	64	37	11
tRF#22-9MV47P594	TGGTCTAGTGGTTAGGATTCGG	i-tRF	29	0	0	0	48	0	0	19	0	0	0	0	0	0	79	94	177	16	86	63	26	0	17	0
tRF#37-WYL1M3WE8S68L52	TCTTGCGACCCGGGTTCGATTCCCGGGCGGCGCACCA	3_tRNA_halve	94	0	0	0	18	11	14	81	25	11	10	0	19	0	160	98	14	36	0	10	0	0	48	0
tRF#30-21V98BNXD8P0	CAACCTATTCTCAAACTTTAAATGGGCAAG	5_U_tRF	17	18	23	11	48	85	33	45	45	0	15	0	0	31	107	36	26	22	12	15	15	33	12	0
tRF#29-Y9PYKHM26RIZ	TTCTCGCCTGCCACGCGGGAGGCCCGGGT	i-tRF	15	16	0	0	0	22	22	27	36	20	24	15	10	13	34	193	0	66	0	0	0	70	45	21
tRF#26-8YQ84V5WNNE	TCCTGGCTGGCTCGCGATGTCTGTTT	3_U_tRF	22	0	0	0	46	42	32	0	0	0	0	0	0	0	281	104	35	75	0	0	0	0	12	0
tRF#25-86J8WPMN1E	TCCCACATGGTCTAGCGGTTAGGAT	5_tRF	35	17	0	12	18	22	31	35	47	12	35	0	24	46	74	44	44	73	63	0	0	0	16	0
tRF#28-PS5P4PW3FJDD	GCCCGGATAGCTCAGTCGGTAGAGCATC	5_tRF	79.998	0	0	19.998	15	18	0	129	65.004	0	0	0	10.002	10.998	64.002	73.998	0	43.002	88.998	19.002	0	0	10.002	0
tRF#20-RV50SRRN	GGTGCGAGAGGTCCCGGGTT	i-tRF	0	0	0	16	0	46	37	68	34	0	0	0	0	0	42	102	0	88	12	28	0	71	39	53
tRF#27-MUWLV47PU9P	CGTGATCGTATAGTGGTTAGTACTCTG	5_tRF	0	11.997	0	0	25.002	12.996	10.998	135.999	114.003	10.998	0	0	0	0	124.002	91.998	39.996	11.997	27	18.999	0	0	0	0
tRF#40-87R8WP9N1EWJQ72S	TCCCTGGTGGTCTAGTGGTTAGGATTCGGCGCTCTCACCG	5_tRNA_halve	11	0	0	0	11	0	0	10	10	0	97	11	10	0	263	141	57	0	0	0	12	0	0	0
tRF#22-NYDRFU8UN	CTTTGAATCCAGCGATCCGAGT	i-tRF	0	13	0	0	19	37	37	44	47	0	0	0	0	0	0	134	0	128	0	0	0	88	65	21
tRF#33-QKF1R3WE8RO8DX	GCGGGAGACCGGGGTTCGATTCCCCGACGGGGA	3_tRNA_halve	38.004	0	0	0	15	0	0	0	0	164.996	42.996	0	162	0	80.988	0	0	0	32.004	77.004	14.004	0	0	0
tRF#31-OSRN2NKSEK51B	GACCGGGGTTCAATTCCCCGACGGGGAGCCA	3_tRF	20	0	0	19	0	30	64	56	39	0	0	0	0	0	40	0	28	13	0	235	0	20	37	25
tRF#27-P4R8YP9LON3	GCATGGGTGGTTCAGTGGTAGAATTCT	5_tRF	0	15	0	0	24	56	60	164	98	0	26	37	0	20	13	15	0	50	0	0	0	19	17	11
tRF#30-86J8WPMN1E8Y	TCCCACATGGTCTAGCGGTTAGGATTCCTG	5_tRF	29	13	0	17	39	0	13	24	23	0	0	0	0	0	117	83	43	88	114	0	0	11	10	0
tRF#19-VIJNRPE8	TAGCTCAGTTGGTAGAGCG	i-tRF	0	0	0	0	26	0	0	0	0	10	122	91	39	19	47	57	15	143	0	0	0	11	43	0
tRF#27-OSRNLNKSEKL	GACCGGGGTTCGATTCCCCGACGGGGA	3_tRF	36.996	0	0	13	12	0	0	14.004	0	80.004	0	0	104.004	18	11.004	0	0	9.996	51.996	237	18	0	0	15
tRF#29-Q1Q89P9L84FS	GCGCCGCTGGTGTAGTGGTATCATGCAAG	5_tRF	21	93	0	0	105	24	28	57	21	0	10	0	0	0	26	201	0	29	0	0	0	0	0	0
tRF#31-J8O9YEKPRS93E	CATGGGACTCTTAATCCCAGGGTCGTGGGTT	i-tRF	33	10	0	20	41	69	38	85	106	0	0	0	0	13	98	33	10	28	0	0	0	13	17	0
tRF#27-M3WE8S68L52	CGGGTTCGATTCCCGGGCGGCGCACCA	3_tRF	0	12	0	0	10	34	29	0	22	276	20	43	0	41	0	12	16	13	0	0	0	26	55	0
tRF#20-3QW6BZUE	CCTATTCTCAAACTTTAAAT	5_U_tRF	13	0	0	15	67	87	21	21	28	0	10	0	13	0	86	42	35	80	12	0	0	12	67	0
tRF#34-623K76IR3DR2I2	GGAGACCGGGGTTCAATTCCCCGACGGGGAGCCA	3_tRF	0	0	10	10	0	27	48	59	47	0	0	0	0	0	0	0	34	17	0	199	31	34	52	40
tRF#36-M26RRNLNK8KEP1B	CGGGAGGCCCGGGTTCGATTCCCGGCCAATGCACCA	3_tRNA_halve	24	0	0	0	22.998	36	33.996	39	16.002	43.002	29.004	0	129.996	66	54	19.998	0	25.002	21	0	0	13.002	34.998	0
tRF#20-I89NJ4S2	ATTGGTGGTTCAGTGGTAGA	5_tRF	29	12	0	33	17	12	11	40	17	0	15	26	17	36	42	59	15	60	71	11	0	41	30	10
tRF#35-6S7P4PZ3V0M8XX	GGCCGGTTAGCTCAGTTGGTTAGAGCGTGGTGCTA	5_tRNA_halve	0	17	0	0	0	0	0	0	0	0	0	0	0	0	160	43	208	145	13	13	0	0	0	0
tRF#20-23KYY8Q1	CAAGTCCCTGTTCGGGCGCC	3_tRF	16	0	0	0	0	31	10	43	14	436	0	0	23	25	0	0	0	0	0	0	0	0	0	0
tRF#22-7LQ673FJN	GTGTAGCTCAGTGGTAGAGCGT	5_tRF	0	0	0	30	0	69	71	35	85	0	0	0	0	0	18	74	11	75	0	0	0	16	68	41
tRF#22-7EMQ18Y31	GTGATCGTATAGTGGTTAGTAC	5_tRF	0	0	0	0	15.003	33.003	35.001	57.996	66.996	0	0	18.999	16.002	27.999	56.997	26.001	24.003	48.996	72.999	0	0	39.996	39.996	12.996
tRF#27-KY7343RX6NK	CCCTGGTGGTCTAGTGGTTAGGATTCG	5_tRF	46	0	0	12	46	23	20	75	75	0	0	0	0	0	75	52	35	0	58	35	0	20	17	0
tRF#50-JY7383RPD9W1X6L85J3K	CATTGGTGGTTCAGTGGTAGAATTCTCGCCTGCCACGCGGGAGGCCCGGG	5_tRF	0	0	77	12.999	0	14	0	10.003	82.999	0	17.003	0	169.001	0	79.002	0	0	0	0	0	66.003	0	0	59.997
tRF#31-897PVP941QKSD	TCCTCGTTAGTATAGTGGTGAGTATCCCCGC	5_tRF	49	27	0	0	0	12	16	41	24	0	33	15	0	0	30	51	43	78	21	13	0	66	37	30
tRF#29-987S1RJ7R3I2	TGTGGGTTCGAGTCCCATCTGGGGTGCCA	3_tRF	0	0	0	0	23	113	65	24	31	14	0	0	0	0	14	50	0	15	0	12	0	29	174	22
tRF#27-69JMW9RKM8N	GGCTCCAGTCTCTTCGGGGGCGTGGGT	i-tRF	31.003	17.003	0	10.997	0	0	0	15.001	0	82.999	65.002	36.001	130.998	37.002	10.997	70	21	14	0	25.998	0	17.997	0	0
tRF#21-Z87HFK8S0	TTTGGGTGCGAGAGGTCCCGG	i-tRF	20	10	0	14	12	37	23	55	69	0	0	0	0	0	21	149	0	50	0	0	0	76	12	33
tRF#28-6XQ6S8V0J8DR	GGCTAGCTCAGTCGGTAGAGCATGGGAC	5_tRF	0	0	0	0	0	23.001	60.999	60	96.999	0	0	0	0	0	45	99	20.001	107.001	0	0	0	36	12.999	18.999
tRF#26-971O0KFMNKE	TGTCTAGTAAACAGGAGATCCTGGGT	i-tRF	11	12	0	0	0	28	18	50	23	12	10	0	10	0	0	175.997	0	145.002	0	0	0	40	27	17
tRF#50-R9JP9PMNH5SYNX2VF0S7	GGTTCCATAGTGTAGCGGTTATCACGTCTGCTTTACACGCAGAAGGTCCT	5_tRF	0	12	232	24	0	14	0	0	162	0	0	0	0	0	91	0	0	0	0	0	43	0	0	0
tRF#30-PM8OHP3D7YNZ	GCATCTCCAAATCAGCCGACGTTTGCTTTT	3_U_tRF	46	19	0	0	51	17	20	0	15	0	0	0	0	0	247	80	28	55	0	0	0	0	0	0
tRF#26-RPM8309MUKD	GGTAGCGTGGCCGAGTGGTCTAAGGC	5_tRF	29	22	0	20	60	23	12	22	11	0	18	0	0	0	88	192	12	41	12	0	0	12	0	0
tRF#37-QK11M3WE8SPOX52	GCGGGAGGCCCGGGTTCGATTCCCGGCCAATGCACCA	3_tRNA_halve	84	0	0	0	0	0	0	0	0	24	12	0	128.004	37.998	85.998	67.998	10.998	37.998	15	13.002	0	0	57	0
tRF#40-J9ZH0SR9593KMH26	CATTCTTGCGACCCGGGTTCGATTCCCGGGCGGCGCACCA	3_tRNA_halve	0	23	0	0	44	10	67	330	77	0	0	0	0	0	16	0	0	0	0	0	0	0	0	0
tRF#34-R9J89O9NF5W8E5	GGTTCCATGGTGTAATGGTTAGCACTCTGGACTC	5_tRNA_halve	45.003	16.002	0	10.997	10.003	16.002	23.002	60.998	17.997	0	0	0	0	0	42	222.999	0	59.997	10.997	11.998	0	0	18.998	0
tRF#25-R3SJ83RPFW	GGGGTGTAGCTCAGTGGTAGAGCGT	5_tRF	0	0	0	16	0	38	67	33	87	0	0	0	0	0	40	135	11	54	0	0	0	48	21	15
tRF#21-LIK898O1B	CGACTCCCGGTGTGGGAACCA	3_tRF	50	23	0	20	112	77	69	48	32	18	15	0	15	0	14	15	0	0	0	13	0	12	21	10
tRF#16-QU6P5BE	GCTGAGGCAGGAGAAT	3_U_tRF	0	0	0	0	40	10	0	0	11	0	0	0	0	0	278	80	18	20	62	17	0	0	24	0
tRF#28-LBLM8D4N4OW	CGAAACGATCTCAACCTATTCTCAAACT	5_U_tRF	43	38	13	0	35	39	122	44	84	0	0	16	0	0	18	0	0	60	0	12	0	15	10	10
tRF#27-JM8LHYD3MUN	CAGTCTCATAATCTGAAGGTCGTGAGT	i-tRF	0	20	0	0	0	36	58	54	40	0	0	0	0	0	22	89	0	78	0	0	0	99	35	28
tRF#20-RK9P4P9L	GGGGGTGTAGCTCAGTGGTA	5_tRF	11	16	0	0	10	0	13	15	23	0	0	0	0	0	103	48	0	22	298	0	0	0	0	0
tRF#21-X6L85J3KE	TGCCACGCGGGAGGCCCGGGT	i-tRF	13	0	0	0	11	21	29	33	21	24	36	0	17	13	0	158	0	58	0	11	0	59	52	0
tRF#27-PS5P4PW3FJI	GCCCGGATAGCTCAGTCGGTAGAGCAT	5_tRF	0	10.998	0	10.002	29.004	51	39	61.998	40.998	0	0	30	0	19.998	31.002	50.004	13.002	90.996	19.998	0	0	46.002	10.002	0
tRF#39-W3FJIKE7UMKKSWIZ	TCGGTAGAGCATGGGACTCTTAATCCCAGGGTCGTGGGT	i-tRF	0	18	0	0	0	27.999	89.001	68.001	66	0	20.001	0	0	0	60.999	39.999	14.001	24	0	0	11.001	57.999	24.999	32.001
tRF#26-QNR8VP94FQB	GCGTTGGTGGTATAGTGGTGAGCATA	5_tRF	95.998	25.998	0	16.002	35	0	17.997	12.999	14	0	0	0	0	0	60.998	29.001	24.997	73.003	148.001	0	0	0	0	0
tRF#30-QNR8VP9LFQFY	GCGTTGGTGGTATAGTGGTAAGCATAGCTG	5_tRF	20	26	0	0	16	17	77	70	74	0	0	0	0	0	10	49	20	76	0	0	0	44	33	19
tRF#22-YJ83MIFJN	TTAGCTCAGTCGGCTAGAGCGT	i-tRF	0	0	0	0	0	0	45	0	0	79	29	0	41	131	0	23	15	85	0	0	0	40	63	0
tRF#36-7K7RWFQ9QV70JZE	GTGGGGTTCCTCGCAGCTTCGCTGCGTGAGCATTTT	3_U_tRF	0	46	0	0	81	46	87	42	97	0	0	0	0	0	68	17	21	16	0	0	0	26	0	0
tRF#21-PYXIZW3ZE	GCCTGTGACTTTTGTCCTTTT	3_U_tRF	31	10	0	0	26	19	15	0	0	0	0	0	0	0	69	31	0	31	199	33	0	21	60	0
tRF#27-WN1Q18X3HRK	TCGTTAGTATAGTGGTGAGTATCCCCG	5_tRF	0	0	0	0	0	22	47	52	48	0	0	0	0	0	40	102	18	82	0	0	0	64	41	27
tRF#24-QNR8VP94EU	GCGTTGGTGGTATAGTGGTGAGCA	5_tRF	53.998	17.997	0	14	10.997	40.999	44.002	36.001	56	0	0	0	0	0	36.001	39.998	31.003	96.999	19.999	0	0	31.997	12.999	0
tRF#35-87R8WP9I1EWJQZ	TCCCTGGTGGTCTAGTGGCTAGGATTCGGCGCTTT	5_tRNA_halve	10	0	0	0	16	0	0	33	16	0	0	0	0	0	185	142	15	21	51	25	18	0	10	0
tRF#31-IWRNL3KQNK71B	ATTGTGGGTTCGAGTCCCATCTGGGGTGCCA	3_tRF	33	0	0	0	34	87	44	22	41	0	0	0	0	27	27	42	20	18	0	10	0	35	86	16
tRF#19-8HM2OSIZ	TCACGCGGGAGACCGGGGT	i-tRF	18	24	0	28	0	49	192	72	122	0	10	0	0	15	0	0	11	0	0	0	0	0	0	0
tRF#23-78QHRYUI0Q	GTTGGGCGCGGGTTGTAACTTTT	3_U_tRF	127	0	0	0	0	38	0	0	0	0	0	0	0	0	118	122	0	118	0	0	0	17	0	0
tRF#25-8KIJLJR7DJ	TCAGGATGGCCGAGCGGTCTAAGGC	5_tRF	72.999	9.999	0	0	26.001	0	34.002	20.997	18.999	0	0	0	0	0	52.002	180.999	0	26.001	0	0	0	48.996	21.996	21.996
tRF#24-6XQ6S8V010	GGCTAGCTCAGTCGGTAGAGCATG	5_tRF	15.003	15.003	0	12.996	38.997	16.002	18.999	37.998	39.996	14.004	29.997	88.002	29.997	38.997	14.004	39.996	0	35.001	0	0	0	25.002	21.996	0
tRF#29-J7KB8JLHZVKQ	CATCTCCAAATCAGCCGACGTTTGCTTTT	3_U_tRF	38	0	0	12	42	13	15	0	13	0	0	0	0	0	273	61	22	40	0	0	0	0	0	0
tRF#22-VBY9PYKHK	TAGAATTCTCGCCTGCCACGCG	i-tRF	0	11	0	0	23	38	60	93	44	0	0	0	0	0	31	101	17	65	0	0	0	14	31	0
tRF#21-Y2R79K3BB	TTAGAGGTCTTGGGGCCGAAA	5_U_tRF	41	18	0	22	73	12	11	19	28	0	0	0	0	0	81	0	50	47	10	39	10	39	28	0
tRF#21-R29P4P9L0	GGGGATGTAGCTCAGTGGTAG	5_tRF	18	0	0	11	0	168	12	19	20	0	0	0	0	37	0	76	21	60	0	0	0	24	49	12
tRF#20-WRD81H93	TCTCCAATGGAGGCGTGGGT	i-tRF	29	20	0	14	12	34	16	34	49	0	0	0	0	0	0	103	0	108	0	15	0	43	34	16
tRF#29-N3R718YKISIM	CTGGTGGTCTAGTGGTTAGGATTCGGCGC	5_tRF	18	15	14	0	24	0	10	33	45	0	0	0	0	0	151	33	22	38	46	33	0	25	19	0
tRF#20-64L2RRM3	GGATGCGAGAGGTCCCGGGT	i-tRF	0	0	0	0	26	16	51	55	30	0	0	0	0	0	18	174	13	45	0	0	0	51	18	28
tRF#41-V47P596VW631QJ3KE	TAGTGGTTAGGATTCGGCGCTCTCACCGCCGCGGCCCGGGT	i-tRF	0	39	11	0	21	28	76	129	89	0	13	0	0	0	53	10	0	10	0	0	19	0	12	14
tRF#20-2ZND0NMZ	CACTTCTGACACATTCGTTT	3_U_tRF	14	10	0	0	38	15	0	0	15	0	0	0	0	0	214	97	15	104	0	0	0	0	0	0
tRF#23-941QKS3WD1	TGGTGAGTATCCCCGCCTGTCAC	i-tRF	11	0	0	0	33	72	36	92	91	0	0	0	0	0	14	49	0	21	0	0	0	53	28	21
tRF#25-QP4PW3FJI0	GCTAGCTCAGTCGGTAGAGCATGAG	i-tRF	11	10	0	0	42	23	14	57	44	13	11	80	14	20	0	50	15	23	0	0	0	15	64	13
tRF#28-RK9P4P9L5HDN	GGGGGTGTAGCTCAGTGGTAGAGCGCGT	5_tRF	15	10.998	0	0	34.998	10.998	0	19.002	30	0	40.002	0	0	0	62.004	106.998	33	121.002	0	0	0	15	19.002	0
tRF#26-6XQ6S8V0JU0	GGCTAGCTCAGTCGGTAGAGCATGAG	5_tRF	0	15	0	0	18	22.002	15	30	51	0	28.998	112.998	13.998	24	25.998	40.998	10.998	69	0	0	0	18	21	0
tRF#21-WR381H93E	TCTCCCCTGGAGGCGTGGGTT	i-tRF	14	0	0	0	11.997	22.996	21	24	24	63.003	55.998	68.004	67.997	15.003	11	0	0	52.996	0	20.998	0	15	28	0
tRF#20-DRJII66K	AATCCCAGCTATTCAGGAGG	3_U_tRF	0	18	0	0	120	0	0	0	0	0	0	0	0	0	102	73	32	0	143	27	0	0	0	0
tRF#22-8XF6RE98N	TCCTAAGCCAGGGATTGTGGGT	i-tRF	12	0	0	0	0	0	27	15	16	0	32	0	38	33	45	79	10	49	0	23	0	74	39	22
tRF#36-VUY9QZR4L2RRM3E	TATGATTCTCGCTTTGGGTGCGAGAGGTCCCGGGTT	i-tRF	0	48	0	13.998	13.002	25.998	64.002	156	103.998	0	0	0	0	0	25.998	0	23.004	16.998	0	0	0	22.002	0	0
tRF#23-R84QPYVMD2	GGTGGCTCATGCCTGTAGTCCCA	3_U_tRF	0	0	18	45	0	12	55	45	51	0	0	0	0	0	85	24	0	0	0	81	12	40	0	41
tRF#25-RPM830MMUK	GGTAGCGTGGCCGAGCGGTCTAAGG	5_tRF	42.003	28.998	0	23.004	18	0	19.998	26.001	30.996	24.003	46.998	0	17.001	26.001	11.997	94.995	9.999	23.004	0	23.004	0	12.996	16.002	9.999
tRF#24-7EMQ18Y3E5	GTGATCGTATAGTGGTTAGTACTC	5_tRF	0	0	0	0	0	18	24.003	51.003	23.004	0	0	37.998	0	27.999	123.003	20.997	20.997	29.997	86.004	0	0	25.002	16.002	0
tRF#28-MIF91SS2P4X	CGGCTAGCTCAGTCGGTAGAGCATGAGA	5_tRF	15	0	0	0	0	13.002	43.002	91.998	109.002	0	0	12	0	0	22.002	39	0	52.998	0	0	0	67.002	25.998	13.002
tRF#26-897PVP941QD	TCCTCGTTAGTATAGTGGTGAGTATC	5_tRF	62	0	0	14	0	0	15	14	13	0	0	0	0	0	18	55	13	46	225	13	0	0	0	16
tRF#21-93301M3KE	TGGGTCCGAGAGGTCCCGGGT	i-tRF	11	0	0	0	0	32	0	43	56	22	11	0	0	0	13	194	0	40	0	0	0	65	17	0
tRF#27-M3WD8SS46D2	CGGGTTCGACTCCCGGTATGGGAACCA	3_tRF	0	10	0	0	28	42	60	11	13	0	0	0	0	0	36	26	0	29	0	36	0	41	124	46
tRF#31-R29P4P9L5HJVE	GGGGATGTAGCTCAGTGGTAGAGCGCATGCT	5_tRF	0	0	0	0	0	13	0	26	17	0	0	0	0	0	132.999	227.998	0	73.002	10	0	0	0	0	0
tRF#24-N44S5N092Q	CTGTGCTCCGGAGTTACCTCGTTT	3_U_tRF	64	25	0	15	35	112	83	35	106	0	0	0	0	0	0	0	0	12	0	0	0	11	0	0
tRF#23-RWF918V0DN	GGTGTAGCTCAGTGGTAGAGCGT	5_tRF	0	0	0	26	0	29	81	41	66	0	0	0	0	0	16	65	27	54	0	0	0	32	27	33
tRF#20-MEJB5YJ3	CGGATCAGAAGATTGCAGGT	i-tRF	0	0	0	0	0	12	18	27	26	0	0	0	0	0	27	114	40	208	0	0	0	24	0	0
tRF#34-VUY9Q9R4L2RR1Y	TATGATTCTCGCTTCGGGTGCGAGAGGTCCCGGG	i-tRF	15	194.001	0	79.998	0	14.001	50.001	72	51	0	0	0	0	0	0	0	0	0	0	0	0	18	0	0
tRF#20-1PSJQM17	AGTAGGTAGCGCGTCAGTCT	i-tRF	10	0	0	0	0	33	0	17	27	0	0	0	0	0	26	59	29	168	0	0	0	71	34	16
tRF#18-8R6546D2	TCCCCGGCACCTCCACCA	3_tRF	13.335	0	0	25.835	15	50	15.835	20	34.165	45	51.67	21.665	22.5	25	10.835	0	20	48.335	0	0	0	44.165	24.165	0
tRF#29-MEF91SS2PMER	CGGATAGCTCAGTCGGTAGAGCATCAGAC	5_tRF	0	0	0	0	0	13.998	24	73.998	48	0	0	0	0	0	24	60	16.002	90	22.002	0	0	64.998	28.998	19.002
tRF#27-QP4PW3FJI01	GCTAGCTCAGTCGGTAGAGCATGAGAC	i-tRF	13	20	0	0	0	14	48	98	85	0	22	0	30	10	0	34	18	44	15	0	0	18	11	0
tRF#21-JOWU1MN0E	CATAATCTGAAGGTCCTGAGT	i-tRF	47	10	0	0	0	43	26	47	47	0	0	0	11	0	19	111	10	59	0	0	0	31	0	18
tRF#26-RNL3KQNK71B	GGGTTCGAGTCCCATCTGGGGTGCCA	3_tRF	0	0	0	12	0	116	43	50	61	0	0	0	0	0	0	33	0	43	0	28	0	0	90	0
tRF#23-7J843W1RDH	GTGGCTCATGCCTGTAGTCCCAG	3_U_tRF	31	0	0	38	11	20	42	16	45	0	11	10	0	0	34	15	32	11	0	48	0	37	31	43
tRF#22-F91SS2P4H	AGCTCAGTCGGTAGAGCATGAG	i-tRF	16	18	0	0	0	26	37	72	62	0	11	0	25	12	10	70	0	38	15	0	0	22	28	11
tRF#20-R29P4P9L	GGGGATGTAGCTCAGTGGTA	5_tRF	41	0	0	10	0	345	0	0	0	0	0	0	0	0	15	49	0	13	0	0	0	0	0	0
tRF#33-I89NJ4S2I7L7DV	ATTGGTGGTTCAGTGGTAGAATTCTCGCCTGCC	5_tRNA_halve	11	0	0	0	45	0	21	57	20	0	0	0	0	0	168	129	0	21	0	0	0	0	0	0
tRF#21-LNK8KDP1B	CGATTCCCGGCCAACGCACCA	3_tRF	0	0	0	0	21	35	52	47	69	0	17	11	0	0	0	55	0	62	0	20	0	34	48	0
tRF#19-IR3DR2I2	ATTCCCCGACGGGGAGCCA	3_tRF	185.003	10.998	0	134.004	17.004	0	14.001	0	0	0	0	0	0	0	0	109.005	0	0	0	0	0	0	0	0
tRF#22-897PVP94H	TCCTCGTTAGTATAGTGGTGAG	5_tRF	32	15	0	0	22	18	0	22	0	10	0	0	16	0	54	69	14	40	106	0	0	12	25	12
tRF#21-KPQ81V18D	CCCAGGCTGGAGTGCAGTGGC	3_U_tRF	0	0	255	11	0	0	0	0	39	0	0	0	0	0	11	0	11	0	0	0	139	0	0	0
tRF#20-9VZVEH93	TGTGCTTTGCACGCGTGGGT	i-tRF	10	15	0	0	0	0	10	16	18	0	0	0	0	0	0	58	13	90	0	67	0	80	47	42
tRF#26-RPM830MMUKD	GGTAGCGTGGCCGAGCGGTCTAAGGC	5_tRF	54.999	24.003	0	27.999	59.004	9.999	12.996	0	0	10.998	12.996	0	11.997	0	79.002	71.001	50.004	12.996	0	11.997	0	0	15.003	0
tRF#21-N113XYWZE	CTGCCAGGGTTGCTGTCTTTT	3_U_tRF	21	13	0	17	85	14	15	12	16	0	0	0	0	0	166	65	0	27	13	0	0	0	0	0
tRF#21-1S91547O0	AGTCGTGGCCGAGTGGTTAAG	5_tRF	16	21	0	94	21	20	16	35	12	0	0	0	0	23	15	67	33	20	0	11	0	24	24	10
tRF#20-79MP9P9N	GTTTCCGTAGTGTAGTGGTT	5_tRF	43	12	0	0	30	0	0	20	0	0	10	0	10	0	168	70	18	24	45	0	0	11	0	0
tRF#35-R0PSR9593J2426	GGGAGGCCCGGGTTCGATTCCCGGCCAATGCACCA	3_tRF	13.998	0	0	0	0	43.998	36	106.002	42	10.998	13.998	0	59.004	55.002	18	10.002	0	12	0	0	0	0	39.996	0
tRF#50-QNR8VP9NFQFY392J1Y0S	GCGTTGGTGGTATAGTGGTTAGCATAGCTGCCTTCCAAGCAGTTGACCCG	5_tRF	0	15	101	34	0	10	0	10	83	0	0	0	13	0	46	16	0	0	0	0	74	13	0	44
tRF#22-QNR8VP94H	GCGTTGGTGGTATAGTGGTGAG	5_tRF	28	24.997	0	16.002	0	45.003	24.997	30.002	44.002	0	0	0	0	0	35	56.994	26.005	66.003	14	0	0	11.998	30.002	0
tRF#26-KY7343RX6ND	CCCTGGTGGTCTAGTGGTTAGGATTC	5_tRF	35	0	0	0	0	0	0	13	11	0	0	0	0	0	181	70	12	24	53	17	0	12	23	0
tRF#21-F91SS2P4B	AGCTCAGTCGGTAGAGCATGA	i-tRF	21	0	0	13	18	0	0	38	59	12	0	46	0	0	14	13	48	50	43	11	0	17	46	0
tRF#26-R8YP9LON4VD	GGTGGTTCAGTGGTAGAATTCTCGCC	i-tRF	15	0	0	0	0	0	0	22	14	0	32	0	49	18	122	103	0	43	30	0	0	0	0	0
tRF#24-R4VIJ4S2IN	GGGTGTAGCTCAGTGGTAGAGCGT	5_tRF	21	14	0	11	0	42	71	36	52	0	0	0	0	0	0	73	15	45	0	0	0	25	29	14
tRF#39-QNR8VP9NFQFY39FS	GCGTTGGTGGTATAGTGGTTAGCATAGCTGCCTTCCAAG	5_tRNA_halve	0	17	0	0	49	36	63	165	38	0	0	0	0	0	52	11	0	15	0	0	0	0	0	0
tRF#26-S3S3RX8HYVD	GTAGTGTAGTGGTTATCACGTTCGCC	i-tRF	22	0	0	0	0	14	18	29	27	0	0	0	0	0	77	87	15	69	30	13	0	29	15	0
tRF#27-897PVP941QJ	TCCTCGTTAGTATAGTGGTGAGTATCC	5_tRF	65	10	0	0	0	0	0	24	37	0	14	0	0	0	25	41	52	22	74	0	0	34	33	12
tRF#33-R9J89O9NF5W8W	GGTTCCATGGTGTAATGGTTAGCACTCTGGACT	5_tRF	24.997	14	0	10.003	26.999	16.002	12.999	45.997	17.997	0	0	0	0	0	51.002	106.001	10.003	56	16.002	10.997	0	23.002	0	0
tRF#22-S3M8309NF	GTAGTCGTGGCCGAGTGGTTAA	5_tRF	14	15	0	16	27	21	31	12	49	0	19	10	0	27	0	22	0	43	12	0	0	62	50	11
tRF#32-M1M3WE8SSP6D2	CGGCCCGGGTTCGATTCCCGGTCAGGGAACCA	3_tRF	25.002	0	0	0	14.004	24.003	0	29.997	20.997	27	0	0	29.997	11.997	35.001	29.997	0	45.999	0	15.003	0	32.004	81.999	16.002
tRF#27-94SX73V2Y8K	TGGTGGTCTAGTGGTTAGGATTCGGCG	5_tRF	17	16	0	0	36	18	33	51	77	0	0	0	0	0	26	47	19	17	17	18	0	33	0	14
tRF#29-QNR8VP9LFQEW	GCGTTGGTGGTATAGTGGTAAGCATAGCT	5_tRF	23	12	0	0	49	37	43	142	83	0	0	0	0	0	0	23	0	26	0	0	0	0	0	0
tRF#27-9MZLB6R3LUN	TGGTCTTGTAAACCAGGGGTCGCGAGT	i-tRF	0	0	0	0	0	0	15	0	14	0	0	0	0	0	43	125	14	75	0	0	0	37	66	48
tRF#24-RPM8309M2S	GGTAGCGTGGCCGAGTGGTCTAAG	5_tRF	12	0	0	0	54	22	0	17	33	0	0	27	0	14	56	102	17	37	0	0	0	26	20	0
tRF#23-86V8WPMNY	TCCCATATGGTCTAGCGGTTAGG	5_tRF	39	0	0	0	0	0	0	0	0	19	0	0	0	0	14	26	0	0	313	0	0	0	26	0
tRF#32-QNR8VP94FQFYJ	GCGTTGGTGGTATAGTGGTGAGCATAGCTGCC	5_tRF	13.002	10.002	0	0	19.998	24	42	213	104.004	0	0	0	0	0	0	0	0	0	10.002	0	0	0	0	0
tRF#34-PS5P4PW3FJHPEQ	GCCCGGATAGCTCAGTCGGTAGAGCATCAGACTT	5_tRNA_halve	0	0	0	0	18	39	25.002	186	46.002	0	0	0	0	0	28.002	46.998	0	19.998	0	0	0	13.002	13.998	0
tRF#24-N3R718YKF5	CTGGTGGTCTAGTGGTTAGGATTC	5_tRF	13	0	0	31	24	10	13	28	27	0	0	0	0	0	56	44	31	71	24	0	0	21	30	13
tRF#25-SVKKN27F7J	GTCGCCCAGGCTGGAGTGCAGTGGC	3_U_tRF	0	0	229	42	0	0	0	0	52	0	0	0	0	0	21	0	0	0	10	0	81	0	0	0
tRF#21-HDPORSM3E	ATAACGCCAAGGTCGCGGGTT	i-tRF	0	0	0	0	0	17	20	57	42	0	0	0	0	0	0	177	0	33	0	0	0	23	65	0
tRF#28-3L7L73J6M9DV	CCGTAGTGTAGTGGTCATCACGTTCGCC	5_tRF	0	0	0	0	11	19	31	18	25	0	0	0	0	0	35	113	13	106	0	0	0	31	30	0
tRF#33-897PVP9N1QKSD3	TCCTCGTTAGTATAGTGGTTAGTATCCCCGCCT	5_tRF	17	0	0	0	0	0	0	82	41	0	0	0	0	0	73	29	44	114	19	0	0	10	0	0
tRF#22-R29P4P9LL	GGGGATGTAGCTCAG-TGGTAGA	5_tRF	10	0	0	0	19	283	0	0	0	0	0	0	0	0	19	53	0	32	0	0	0	0	0	13
tRF#28-6NMH490VL8DJ	GGATTCGGCGCTCTCACCGCCGCGGCCC	i-tRF	0	0	0	0	0	17	36	112	109	0	0	0	0	0	14	47	0	50	0	0	0	32	11	0
tRF#37-RUSMKVNMEH623KN	GGTGAGTATCCCCGCCTGTCACGCGGGAGACCGGGGT	i-tRF	0	16	16	0	0	28	42	34	28	0	30	0	23	11	0	47	0	48	0	0	0	59	22	23
tRF#20-R8WP9N1E	GGTGGTCTAGTGGTTAGGAT	i-tRF	17	11	0	0	15	21	34	46	47	0	0	0	0	0	12	20	37	66	13	33	0	20	0	35
tRF#31-RPM8309MUKLY0	GGTAGCGTGGCCGAGTGGTCTAAGGCGCTGG	5_tRF	18	12	0	0	31	0	0	0	0	0	0	0	0	0	23	183	0	93	0	0	0	29	36	0
tRF#22-9V881X3SQ	TGTGCTCCGGAGTTACCTCGTT	3_U_tRF	14	0	0	0	0	19	0	23	17	86	14	0	119	92	0	0	0	0	0	0	0	26	15	0
tRF#20-N113XYWZ	CTGCCAGGGTTGCTGTCTTT	3_U_tRF	23	0	0	11	34	0	0	15	14	0	0	0	0	0	186	98	10	32	0	0	0	0	0	0
tRF#38-KY5J7KYUHRERXFD2	CCCTGGAGGCGTGGGTTCGAATCCCACTCCTGACACCA	3_tRF	71.001	0	10.003	0	0	0	0	10.003	0	0	0	0	0	0	108.997	43.001	24.997	38.997	0	0	35	24.997	44.002	11.998
tRF#22-LBLM8D4N3	CGAAACGATCTCAACCTATTCT	5_U_tRF	18	0	0	17	25	57	78	27	46	0	0	0	0	15	32	10	19	65	0	0	0	13	0	0
tRF#27-W1X6L85J3KQ	TCGCCTGCCACGCGGGAGGCCCGGGTT	i-tRF	0	0	0	16	0	20	43	76	85	0	0	0	0	0	11	37	17	58	0	0	0	47	10	0
tRF#19-R4L2RR1Y	GGGTGCGAGAGGTCCCGGG	i-tRF	12	0	0	0	12	28	0	18	30	0	0	0	0	0	0	203	0	28	0	0	0	31	37	21
tRF#20-HEPURYX3	ATAATGCCGAGGTTGTGAGT	i-tRF	37	14	0	0	11	14	10	32	24	0	0	0	0	0	0	104	0	14	21	0	0	57	39	42
tRF#34-7K7RWFQ9QV701E	GTGGGGTTCCTCGCAGCTTCGCTGCGTGAGCATT	3_U_tRF	0	44	0	0	66	11	10	25	78	0	0	0	0	0	60	0	51	38	0	0	0	35	0	0
tRF#33-QKF1R38E8RO8DX	GCGGGAGACCGGGGTTCAATTCCCCGACGGGGA	3_tRNA_halve	68	0	0	0	13	0	0	0	0	90	0	12	111	15	56	0	0	0	20	30	0	0	0	0
tRF#21-QVJKZISZE	GCTGCCAGGGTTGCTGTCTTT	3_U_tRF	42	23	0	19	60	21	19	19	0	0	0	0	0	0	131	42	19	20	0	0	0	0	0	0
tRF#20-7SIR3DR2	GTTCGATTCCCCGACGGGGA	3_tRF	15.996	0	0	0	0	0	0	0	0	82.004	14.004	0	144.996	0	27.996	15	0	0	53.004	51.996	0	0	9.996	0
tRF#28-X24ZD7JKW4DZ	TGAGACTCTTAATCTCAGGGTCGTGGGT	i-tRF	13	0	0	0	0	15	74	51	103	0	0	0	0	0	0	52	0	33	0	0	0	32	22	18
tRF#32-RK9P4P9L5FZU3	GGGGGTGTAGCTCAGTGGTAGAGCATTTGACT	5_tRF	13	0	0	0	0	0	0	0	0	0	273	14	0	15	13	0	17	0	65	0	0	0	0	0
tRF#20-LBLM8D4N	CGAAACGATCTCAACCTATT	5_U_tRF	52	0	0	10	59	58	27	25	44	0	0	0	0	0	11	0	28	66	12	0	0	18	0	0
tRF#23-9I69QESY0Q	TGGCTGGCTCGCGATGTCTGTTT	3_U_tRF	39	0	0	0	15	35	0	0	12	0	0	0	0	0	133	89	24	62	0	0	0	0	0	0
tRF#22-282K63ZNQ	CACGGCAAGGGGAGTTTGTTTT	3_U_tRF	0	0	0	0	0	34	13	0	17	0	0	0	0	0	170	53	82	40	0	0	0	0	0	0
tRF#26-N3R718YKIS0	CTGGTGGTCTAGTGGTTAGGATTCGG	5_tRF	18	21	0	0	14	0	0	23	29	0	0	0	0	0	21	78	68	28	39	15	18	12	10	13
tRF#21-R8WP9N1EE	GGTGGTCTAGTGGTTAGGATT	i-tRF	25	0	0	0	0	15	0	21	12	0	0	0	0	0	14	30	28	68	88	42	17	0	24	23
tRF#23-4QD7OKW4Z	CTCATAATCTGAAGGTCGTGAGT	i-tRF	0	0	0	0	0	37	29	35	27	0	0	0	0	0	0	90	0	55	0	0	0	43	68	20
tRF#22-YLI1539UN	TTATAATGCCGAGGTTGTGAGT	i-tRF	0	34	0	0	0	15	22	30	38	0	0	0	0	0	0	56	12	57	0	13	0	90	37	0
tRF#33-87R8WP9I1EWJDW	TCCCTGGTGGTCTAGTGGCTAGGATTCGGCGCT	5_tRF	94	12	0	0	0	0	0	14	0	0	0	0	0	0	103	81	13	14	72	0	0	0	0	0
tRF#22-N44S5N09N	CTGTGCTCCGGAGTTACCTCGT	3_U_tRF	0	0	0	0	0	19	0	14	0	92	60	0	86	45	12	0	0	15	0	0	0	18	30	12
tRF#27-3SY3H3RXSMJ	CCTCGTTAGTATAGTGGTTAGTATCCC	5_tRF	0	0	0	14	46	16	0	0	11	16	37	127	0	19	61	0	16	0	0	0	0	14	25	0
tRF#25-F1R3WE8RO8	AGACCGGGGTTCGATTCCCCGACGG	i-tRF	11	0	0	13	0	0	0	0	0	0	0	0	0	0	34	72	29	30	11	112	44	0	0	46
tRF#29-8W1W18YMEN1V	TCCGTAGTGTAGTGGTTATCACGTTCGCC	5_tRF	20	10	0	0	19	17	25	48	31	0	0	0	0	0	0	62	11	78	11	0	0	34	35	0
tRF#22-QVJKZISZQ	GCTGCCAGGGTTGCTGTCTTTT	3_U_tRF	44	12	0	19	62	49	21	30	29	0	0	0	0	0	56	32	0	47	0	0	0	0	0	0
tRF#22-PYXIZW3ZQ	GCCTGTGACTTTTGTCCTTTTT	3_U_tRF	27	0	0	0	24	12	10	12	0	0	0	0	0	0	77	17	0	42	108	33	0	21	18	0
tRF#20-QP4PW3FJ	GCTAGCTCAGTCGGTAGAGC	i-tRF	49	0	0	25	0	11	11	38	22	0	32	41	0	0	0	53	0	53	50	0	0	16	0	0
tRF#18-VIJNRXDS	TAGCTCAGTTGGTTAGAG	i-tRF	0	0	13	13	11	22	0	0	0	19	10	35	0	15	22	41	15	147	0	0	0	0	38	0
tRF#20-NKPY9WZZ	CTGGGGCCTGTGTGTTTTTT	3_U_tRF	174	0	0	0	32	18	0	0	0	0	0	0	0	0	117	20	0	39	0	0	0	0	0	0
tRF#19-7LFPRSKQ	GTGTAAGCAGGGTCGTTTT	3_U_tRF	233	100	0	67	0	0	0	0	0	0	0	0	0	0	0	0	0	0	0	0	0	0	0	0
tRF#48-6V3JVIJMRPFQRDWXHRY	GGCGCCCGGCTAGCTCAGTCGGTAGAGCATGGGACTCTTAATCCCAGG	other	23	0	251	15	0	0	0	0	0	0	0	0	0	0	0	0	0	0	0	0	108	0	0	0
tRF#30-R9JP9P9NH5SY	GGTTCCATAGTGTAGTGGTTATCACGTCTG	5_tRF	63	10	0	0	11	0	25	30	14	0	0	0	0	0	35	48	0	10	99	0	0	17	22	13
tRF#21-SX73V2Y8D	GTCTAGTGGTTAGGATTCGGC	i-tRF	13	0	0	0	16	0	18	32	28	0	0	0	0	0	44	34	30	16	95	28	0	19	11	12
tRF#20-LNK88KO1	CGATTCCCGGTCAGGGAACC	3_tRF	10	0	0	0	56	29	13	45	32	50	0	0	79	35	0	0	0	0	35	12	0	0	0	0
tRF#36-9EYK46S9Y8RH93E	TGGATTTAGGCTCCAGTCTCTTCGGGGGCGTGGGTT	i-tRF	29	38	0	77	14	0	0	0	0	0	10	0	0	0	75	37	35	14	0	23	0	31	12	0
tRF#19-8O90Q42E	TCCAATGGAGGCGTGGGTT	i-tRF	67	36	0	27	11	32	38	20	43	22	0	0	0	0	12	25	0	0	0	0	0	61	0	0
tRF#28-789LV470JPDP	GTTGGTGGTATAGTGGTGAGCATAGCTG	5_tRF	28.002	0	12	0	0	33	37.002	30	46.998	0	0	0	0	0	40.002	28.002	0	87	0	0	0	19.998	31.002	0
tRF#30-IKE7UMKKSWRN	ATGGGACTCTTAATCCCAGGGTCGTGGGTT	i-tRF	17	0	0	0	52	28	21	18	30	0	0	0	0	0	95	82	24	0	0	10	0	0	14	0
tRF#21-LBLM8D4ND	CGAAACGATCTCAACCTATTC	5_U_tRF	36	12	0	22	45	40	31	18	36	0	0	0	0	0	20	0	12	66	0	0	0	23	29	0
tRF#47-PNR8YP9LON4VN1EH6KJ	GCATTGGTGGTTCAGTGGTAGAATTCTCGCCTGCCACGCGGGAGGCC	5_tRF	11.998	0	31.003	0	0	16.002	0	18.998	12.999	22.001	158.998	0	45.997	0	30.996	0	0	0	0	0	30.002	0	0	10.997
tRF#22-7673FEWSJ	GTTCAGTGGTAGAATTCTCGCC	i-tRF	12	0	0	0	0	0	18	64	30	0	0	0	0	0	35	91	20	32	47	10	0	20	10	0
tRF#20-W7WK6WRN	TCTCTTCGGGGGCGTGGGTT	i-tRF	14	15.001	0	31.997	22.001	0	12.999	0	0	26.999	17.003	0	29.001	24.997	53.998	29.001	22.001	18.998	11.998	30.002	0	0	14	11.998
tRF#37-S4I7LZ93Q01M3KQ	GTATGATTCTCGCTTTGGGTGCGAGAGGTCCCGGGTT	i-tRF	0	25.002	0	10.998	12	0	21	73.998	49.002	0	0	0	0	0	16.002	18	36	19.998	0	0	0	62	13.002	28.002
tRF#24-KB8JLHZVKQ	CCAAATCAGCCGACGTTTGCTTTT	3_U_tRF	24	0	0	0	20	26	21	0	27	0	0	0	0	0	144	54	15	54	0	0	0	0	0	0
tRF#34-RLXN4VZ87HFKJJ	GGGTATGATTCTCGCTTTGGGTGCGAGAGGTCCC	i-tRF	0	0	0	0	0	0	18	34	32	0	0	0	0	0	29	72	0	62	0	0	0	54	50	33
tRF#26-V470VR3196D	TAGTGGTGAGTATCCCCGCCTGTCAC	i-tRF	0	0	0	0	23	35	44	79	60	0	0	0	0	0	15	23	0	44	0	0	0	49	0	12
tRF#23-RPM830MM0F	GGTAGCGTGGCCGAGCGGTCTAA	5_tRF	28.998	0	0	26.001	53.001	19.998	19.998	36	39.996	0	19.998	26.001	14.004	12.996	0	21.996	12.996	16.002	0	23.004	0	0	12.996	0
tRF#30-Z3R918VBY9PY	TTGGTGGTTCAGTGGTAGAATTCTCGCCTG	5_tRNA_halve	0	0	0	0	0	14	21	74	54	0	0	0	0	0	0	55	0	77	0	0	0	54	23	10
tRF#25-SP58309MUK	GTCAGGATGGCCGAGTGGTCTAAGG	5_tRF	14	0	0	0	0	38	118	135	77	0	0	0	0	0	0	0	0	0	0	0	0	0	0	0
tRF#20-OD5721V9	GAAACGATCTCAACCTATTC	5_U_tRF	49	12	0	10	72	38	13	17	34	0	0	0	0	14	28	0	24	28	0	0	0	24	18	0
tRF#42-79MP9P9NH57S362VL	GTTTCCGTAGTGTAGTGGTTATCACGTTCGCCTCACACGCGA	5_tRF	67.005	44.001	19.998	0	11.997	10.998	37.998	30.996	18	0	25.002	0	0	0	37.998	0	0	0	0	0	40.995	18.999	16.002	0
tRF#21-09F0S9EZE	ACCTCAGAAGGTCTCACTTTT	3_U_tRF	31	13	0	0	0	62	46	66	39	0	0	0	0	0	0	44	10	18	0	0	0	25	14	11
tRF#30-PS5P4PW3FJHP	GCCCGGATAGCTCAGTCGGTAGAGCATCAG	5_tRF	13.998	21	0	18	33	15	12	40.998	34.998	0	10.002	0	0	0	10.998	100.998	0	25.002	15	0	0	16.002	0	10.998
tRF#33-5Z1IK34ZMKQ4DZ	GATTTAGGCTCCAGTCTCTTCGGGGGCGTGGGT	i-tRF	14	19	0	0	0	0	0	0	0	18	53	0	46	37	29	53	16	61	0	0	0	14	17	0
tRF#31-W01KN44VD3YZE	TCGAGAGGGGCTGTGCTCGCAAGGTTTCTTT	3_U_tRF	62	55	19	0	54	0	54	32	48	0	0	0	0	0	17	16	0	19	0	0	0	0	0	0
tRF#35-R008R9D9KUMKF6	GGGAGACCGGGGTTCAATTCCCCGACGGGGAGCCA	3_tRF	16	0	0	0	0	0	18	12	0	47	0	0	44	0	41	0	0	0	44	95	31	0	15	12
tRF#21-MXSL73VLE	CGTTAGTATAGTGGTTAGTAT	5_tRF	0	0	0	0	0	0	0	0	10	136	16	0	22	10	25	11	16	30	0	0	0	0	98	0
tRF#34-L85DMKYUYRLHIX	CGCGGGAGACCGGGGTTCGATTCCCCGACGGGGA	3_tRNA_halve	24	0	0	0	0	0	0	0	0	61	9.996	0	82.992	0	0	0	0	0	18.996	135	41.004	0	0	0
tRF#21-U45O6QJ1E	TAATGGATAAGGCATCAGCCT	i-tRF	0	0	0	0	0	16	0	43	13	0	0	0	0	0	102	69	27	10	0	16	0	26	50	0
tRF#20-5P4PW3FJ	GATAGCTCAGTCGGTAGAGC	i-tRF	18.998	0	0	0	12.999	0	0	14	0	0	0	18.998	10.997	31.003	0	10.003	12	26.999	205.002	0	0	0	10.997	0
tRF#36-JJ6RRNLIK898O1B	CAGGCGGCCCGGGTTCGACTCCCGGTGTGGGAACCA	3_tRNA_halve	0	15	0	11	26	30	44	32	27	0	0	0	0	0	40	0	10	0	39	10	11	13	37	26
tRF#31-9NJ4S2I7L7P50	TGGTTCAGTGGTAGAATTCTCGCCTGCCACG	i-tRF	0	20	0	0	0	0	31	32	38	0	0	0	0	0	21	106	13	28	0	0	0	37	32	12
tRF#26-QSD2NSWWDZE	GCTCGAAGGACTTCGTCTGTAATTTT	3_U_tRF	0	12	0	11	55	129	0	27	30	0	0	0	0	0	62	33	0	10	0	0	0	0	0	0
tRF#26-18LPMBQ4NKD	AGTGGCGCAGCGGAAGCGTGCTGGGC	i-tRF	10.998	0	0	10.998	12.996	0	0	0	0	0	0	0	0	0	99.999	126.999	0	23.004	60.003	22.995	0	0	0	0
tRF#41-VKS4I7LZ93Q01M3KE	TAGGGGTATGATTCTCGCTTTGGGTGCGAGAGGTCCCGGGT	i-tRF	0	36	14	0	0	10	44	24	24	0	11	0	0	0	68	15	13	0	0	0	35	40	0	30
tRF#25-F91SS2P4FI	AGCTCAGTCGGTAGAGCATGAGACT	i-tRF	31.997	14	0	0	0	12.999	0	51.002	37.002	0	0	0	0	0	59.003	56	12.999	24.997	53.998	10.003	0	0	0	0
tRF#21-3WOZZMNZE	CCTGTGACTTTTGTCCTTTTT	3_U_tRF	0	0	0	0	30	0	0	10	0	0	0	0	0	0	33	21	14	101	39	0	0	43	58	13
tRF#24-R95933JK0V	GGTTCGATTCCCGGTCAGGGAACC	3_tRF	25.002	0	0	0	18	0	0	0	11.997	26.001	0	0	91.998	0	16.002	0	0	0	116.001	39.996	0	0	17.001	0
tRF#22-5P4PW3FJI	GATAGCTCAGTCGGTAGAGCAT	i-tRF	0	0	0	0	0	15.001	33.999	49	52.997	0	0	0	0	0	25.998	40.999	11.998	32.998	21	0	0	45.003	19.999	10.003
tRF#20-VLV47PVR	TAGTATAGTGGTTAGTATCC	i-tRF	10	0	0	0	33	0	0	0	0	0	121	0	0	10	19	0	10	99	23	0	0	11	22	0
tRF#21-WR645J7KE	TCTCCGGATGGAGGCGTGGGT	i-tRF	23	14	0	11	15	11	14	14	0	0	0	0	0	0	18	35	0	47	55	30	0	24	30	16
tRF#24-NJ9ILU972Q	CTGGCTGGCTCGCGATGTCTGTTT	3_U_tRF	17	0	0	0	0	46	19	0	33	0	0	0	0	0	115	79	11	36	0	0	0	0	0	0
tRF#21-4E8BR9M3E	CTAATTCAAAGGTTCCGGGTT	i-tRF	0	0	0	0	0	14	34	36	38	0	0	0	0	0	15	24	16	63	0	0	0	61	32	23
tRF#27-N3R718YKISM	CTGGTGGTCTAGTGGTTAGGATTCGGC	5_tRF	28	0	0	0	12	13	25	39	56	0	0	0	0	0	18	35	0	64	20	10	0	22	13	0
tRF#23-RX6NMH49V	GGTTAGGATTCGGCGCTCTCACC	i-tRF	19	0	0	0	0	42	23	30	69	0	0	0	0	0	59	37	16	34	0	0	0	26	0	0
tRF#19-3ZW0HI2Q	CCTTTTCGAGATACTGTTT	3_U_tRF	159	58	10	93	0	10	0	0	14	0	0	0	0	0	0	0	0	0	0	0	0	11	0	0
tRF#35-QNR8VP9LFQFY39	GCGTTGGTGGTATAGTGGTAAGCATAGCTGCCTTC	5_tRNA_halve	0	18	0	0	19	0	14	80	12	0	0	0	0	0	38	55	54	49	0	0	0	0	14	0
tRF#24-V4VH7Q2WHM	TAGTGTAGCGGTTATCACGTCTGC	i-tRF	0	0	0	0	0	0	0	0	0	53	14	25	15	49	24	0	0	86	0	0	0	0	87	0
tRF#24-7673FEWS1P	GTTCAGTGGTAGAATTCTCGCCTG	i-tRF	0	30	0	0	0	0	13	66	14	0	0	0	10	0	0	29	41	99	0	19	0	10	22	0
tRF#24-73V2Y8L9J1	GTGGTTAGGATTCGGCGCTCTCAC	i-tRF	0	0	0	11	12	19	10	50	55	0	0	0	0	0	0	39	25	37	0	0	0	57	27	10
tRF#20-YEKPRS93	TTAATCCCAGGGTCGTGGGT	i-tRF	0	0	0	0	0	16	13	33	18	0	0	0	0	0	0	100	0	59	0	14	0	55	34	10
tRF#19-18YKISIM	AGTGGTTAGGATTCGGCGC	i-tRF	190	90	10	50	0	0	0	0	0	0	0	0	0	0	0	0	12	0	0	0	0	0	0	0
tRF#34-6NVJ8PW7WK6WIZ	GGATTTAGGCTCCAGTCTCTTCGGGGGCGTGGGT	i-tRF	18	20	0	22	0	0	0	11	0	15	46	24	31	0	38	41	29	32	0	0	0	22	0	0
tRF#22-MI7O3B1N4	CGGCTGTTAACCGAAAGGTTGG	i-tRF	15	15	0	0	10	27	14	26	31	0	0	0	0	0	10	91	0	49	0	0	0	21	30	10
tRF#50-86J8WPMN1E8Y7Z2R1HPS	TCCCACATGGTCTAGCGGTTAGGATTCCTGGTTTTCACCCAGGCGGCCCG	5_tRF	0	0	96	20	0	0	0	10	143	0	0	0	17	0	25	0	0	0	0	0	37	0	0	0
tRF#32-79MP9PMNH5ISJ	GTTTCCGTAGTGTAGCGGTTATCACATTCGCC	5_tRF	40	0	10	0	19	0	16	16	0	0	0	0	0	0	87	38	33	23	66	0	0	0	0	0
tRF#23-Z5EFOK8YDZ	TTTACACGCAGAAGGTCCTGGGT	i-tRF	0	24	0	0	0	16	14	22	0	0	0	0	0	0	14	80	11	54	0	0	0	50	51	12
tRF#21-SP5830MME	GTCAGGATGGCCGAGCGGTCT	5_tRF	11.997	16.002	0	0	38.997	27	15.003	15.003	0	0	0	0	0	0	33.993	115.992	9.999	14.004	15.003	0	0	24.003	0	10.998
tRF#21-PSQP4PW3B	GCCCGGCTAGCTCAGTCGGTA	5_tRF	141.003	0	0	23.004	32.004	67.001	10.998	24.003	0	0	10.998	0	0	0	0	0	0	0	36.999	0	0	0	0	0
tRF#34-5QKDN6QQ1362HQ	GATATCCAACCTTCAGCTATAGGGTGGAGACTTT	3_U_tRF	0	11	0	0	0	59	16	72	30	0	0	0	0	0	44	62	0	51	0	0	0	0	0	0
tRF#21-9JQKZLEZE	TGGGCGCGGGTTGTAACTTTT	3_U_tRF	38	0	0	0	0	25	0	0	0	0	0	0	0	0	87	54	46	79	0	0	0	16	0	0
tRF#25-3K76IR3DR2	CCGGGGTTCAATTCCCCGACGGGGA	3_tRF	36	0	0	0	18	0	0	0	0	45	0	0	40	0	47	18	0	0	65	60	0	15	0	0
tRF#21-9MVH7P59D	TGGTCTAGCGGTTAGGATTCC	i-tRF	0	15	0	0	0	43	29	71	88	0	0	0	0	0	0	19	0	38	0	0	0	17	12	12
tRF#23-NMEH623K0E	CTGTCACGCGGGAGACCGGGGTT	i-tRF	0	14	0	0	0	11	50	55	59	0	0	0	0	0	0	46	0	20	0	0	0	48	17	23
tRF#20-YE4PRS93	TTAATCTCAGGGTCGTGGGT	i-tRF	10	20	0	0	0	40	36	68	63	0	0	0	0	0	0	31	0	19	0	0	0	38	0	17
tRF#31-PSQP4PW3FJI0B	GCCCGGCTAGCTCAGTCGGTAGAGCATGAGA	5_tRF	22.998	19.002	0	0	19.998	21	13.002	16.998	33	12	19.998	51	0	16.998	25.002	10.998	10.002	21	0	0	0	13.998	13.998	0
tRF#26-BHH9B7I72DE	AAACGATCTCAACCTATTCTCAAACT	5_U_tRF	19	0	16	0	104	34	11	12	38	0	0	0	0	0	17	0	17	26	0	19	0	26	0	0
tRF#28-QNR8VP9LFQ9	GCGTTGGTGGTATAGTGGTAAGCATAGC	5_tRF	0	20	0	0	26	30	42	100	62	0	0	0	0	0	0	29	0	16	0	0	0	12	0	0
tRF#27-R918VBY9PYJ	GGTTCAGTGGTAGAATTCTCGCCTGCC	i-tRF	0	0	0	0	0	15	14	40	28	0	0	0	0	0	17	89	22	70	0	0	0	23	17	0
tRF#19-V47P59I8	TAGTGGTTAGGATTCGGCG	i-tRF	144	136	0	43	12	0	0	0	0	0	0	0	0	0	0	0	0	0	0	0	0	0	0	0
tRF#23-94V4SMIFX	TGGTGTAGTGGTATCATGCAAGA	i-tRF	0	0	0	0	18	15	18	30	20	0	0	0	0	0	19	33	0	44	0	0	0	75	51	11
tRF#32-87R8WP9I1EWJM	TCCCTGGTGGTCTAGTGGCTAGGATTCGGCGC	5_tRF	17	11	0	0	0	0	0	17	0	0	0	0	0	0	126	88	11	15	48	0	0	0	0	0
tRF#30-Y2R79K3BEE4O	TTAGAGGTCTTGGGGCCGAAACGATCTCAA	5_U_tRF	71	17	70	12	31	18	11	15	53	0	0	0	0	0	0	0	0	0	0	0	20	15	0	0
tRF#25-F91SS2P46I	AGCTCAGTCGGTAGAGCATGGGACT	i-tRF	21	0	0	0	0	0	10	38	21	11	0	27	0	0	10	58	33	39	43	22	0	0	0	0
tRF#24-EE4O3QW60W	ACGATCTCAACCTATTCTCAAACT	5_U_tRF	12	0	0	20	32	34	16	0	32	13	10	0	0	45	0	13	12	57	0	0	0	24	13	0
tRF#50-79MP9PMNH5IS362VO0SR	GTTTCCGTAGTGTAGCGGTTATCACATTCGCCTCACACGCGAAAGGTCCC	5_tRF	0	0	47	19	0	10	0	0	106	0	0	0	86	0	30	0	0	0	0	0	16	0	0	18
tRF#37-R9JP9P9NH5SYNX2	GGTTCCATAGTGTAGTGGTTATCACGTCTGCTTTACA	5_tRNA_halve	24	0	0	0	10	0	18	54	17	0	0	0	0	0	28	99	0	0	0	11	12	22	37	0
tRF#20-SP5830MM	GTCAGGATGGCCGAGCGGTC	5_tRF	20.997	12.996	0	0	36	17.001	16.002	12.996	24.003	17.001	0	0	14.004	23.004	12.996	36	21.996	0	48.996	0	0	18	0	0
tRF#36-Z41DD8282K63ZNE	TTGTGAGGACAATGGCACGGCAAGGGGAGTTTGTTT	3_U_tRF	0	0	0	10	0	10	0	0	0	0	0	0	0	0	144	38	77	38	0	0	0	14	0	0
tRF#23-9N1QKS3WD1	TGGTTAGTATCCCCGCCTGTCAC	i-tRF	0	0	0	0	13	36	40	42	96	0	0	0	0	0	21	17	0	0	0	0	0	51	0	15
tRF#35-9EYK46SQYU9H93	TGGATTTAGGCTCCAGTCATTTCGATGGCGTGGGT	i-tRF	40	32	0	0	13	0	0	0	0	0	0	0	0	0	35	61	17	20	0	0	0	62	30	19
tRF#34-68K87SERM492E2	GGCGGCCCGGGTTCGACTCCCGGTGTGGGAACCA	3_tRF	0	0	0	0	0	54	71	20	26	0	0	0	0	0	17	15	0	11	0	19	0	21	61	14
tRF#22-WD8SS46D2	TCGACTCCCGGTATGGGAACCA	3_tRF	0	0	0	0	24	11	47	34	30	0	12	0	20	0	0	14	13	39	0	39	0	35	0	11
tRF#32-IX69JMW9RKM8N	ATTTAGGCTCCAGTCTCTTCGGGGGCGTGGGT	i-tRF	15	10	0	0	0	10	14	10	14	0	44	15	37	28	37	48	0	31	0	0	0	0	14	0
tRF#29-PS5P4PW3FJF2	GCCCGGATAGCTCAGTCGGTAGAGCATCA	5_tRF	37.002	0	0	21	19.002	16.002	16.998	84	31.002	0	0	0	0	0	0	22.002	0	10.998	54	0	0	0	13.998	0
tRF#20-R7F8YKIR	GGTCTAGCGGTTAGGATTCC	i-tRF	0	13	0	0	20	27	11	36	50	0	0	0	0	0	21	31	17	75	0	0	0	11	14	0
tRF#32-7P596VW631QJJ	GTTAGGATTCGGCGCTCTCACCGCCGCGGCCC	i-tRF	0	0	0	0	0	0	49	79	78	0	0	0	0	0	13	20	0	43	0	0	0	21	22	0
tRF#26-RNLIK898O1B	GGGTTCGACTCCCGGTGTGGGAACCA	3_tRF	0	17	0	18	13	60	51	18	27	0	0	0	0	0	0	22	12	51	0	0	0	0	36	0
tRF#18-SRHYRSD2	GTCCCATCTGGGTCGCCA	3_tRF	26	0	0	57	24	48	40	50	68	0	0	0	0	0	0	0	0	0	0	11	0	0	0	0
tRF#20-7EMQ18Y3	GTGATCGTATAGTGGTTAGT	5_tRF	0	0	0	24.003	0	43.002	14.004	24.003	24.003	0	0	0	0	0	14.004	16.002	18.999	19.998	87.003	0	0	18	19.998	0
tRF#29-MY73H3RUPLIP	CGTTGGTGGTATAGTGGTGAGCATAGCTG	5_tRF	16.002	13.998	10.002	0	0	46.002	58.002	36	28.998	0	0	0	0	0	0	22.998	0	39	0	0	0	37.002	15	0
tRF#20-RPM8309M	GGTAGCGTGGCCGAGTGGTC	5_tRF	18	0	0	0	0	51	0	35	35	18	16	0	0	0	0	67	0	49	23	11	0	0	0	0
tRF#24-Q1Q89P9LJI	GCGCCGCTGGTGTAGTGGTATCAT	5_tRF	59	0	0	0	22	0	0	12	0	0	0	0	0	0	53	76	24	29	22	11	0	0	0	14
tRF#22-8EKSP1852	TCAATCCCCGGCACCTCCACCA	3_tRF	0	0	0	0	0	22.5	33.75	23.25	29.25	40.5	48.75	0	83.25	28.5	0	12	0	0	0	0	0	0	0	0
tRF#28-476YQSL4WW0Q	CTCCTGGCTGGCTCGCGATGTCTGTTTT	3_U_tRF	23	0	0	0	0	19	14	0	0	0	0	0	0	0	205	15	10	35	0	0	0	0	0	0
tRF#31-Y2R79K3BEE4OD	TTAGAGGTCTTGGGGCCGAAACGATCTCAAC	5_U_tRF	36	0	54	24	10	31	0	0	97	0	10	0	0	0	0	0	0	0	0	0	48	0	10	0
tRF#20-V470VR31	TAGTGGTGAGTATCCCCGCC	i-tRF	36	0	0	12	12	24	18	72	11	0	0	0	0	0	0	46	0	22	13	0	0	16	23	15
tRF#29-389MV47P59I8	CCTGGTGGTCTAGTGGTTAGGATTCGGCG	5_tRF	11	14	0	0	17	12	19	54	42	0	0	0	0	0	22	30	12	30	16	19	10	10	0	0
tRF#17-VNJNRXL	TAGTTCAGTTGGTTAGA	i-tRF	0	0	0	0	0	0	0	0	0	0	68	12	15	40	27	23	26	75	0	0	0	0	32	0
tRF#50-QNR8VP94FQFY392J1Y0S	GCGTTGGTGGTATAGTGGTGAGCATAGCTGCCTTCCAAGCAGTTGACCCG	5_tRF	0	12	98.004	36	0	0	0	0	75	0	0	0	0	0	61.002	0	0	0	0	0	16.998	0	0	18
tRF#48-34HWH3RXSINHZ4PVFOD3	CCGTGATCGTATAGTGGTTAGTACTCTGCGTTGTGGCCGCAGCAACCT	5_tRF	0	0	33.003	0	0	0	0	0	0	0	102.996	10.998	152.001	0	18	0	0	0	0	0	0	0	0	0
tRF#25-RPM8309MUK	GGTAGCGTGGCCGAGTGGTCTAAGG	5_tRF	28	12	0	18	36	23	17	19	27	0	0	0	0	0	44	44	26	12	0	0	0	0	10	0
tRF#23-LM8D4N4OW	CGATCTCAACCTATTCTCAAACT	5_U_tRF	17	11	0	17	38	50	13	0	40	0	0	0	0	20	35	0	0	29	0	10	0	25	10	0
tRF#20-43RX6NMH	CTAGTGGTTAGGATTCGGCG	i-tRF	12	0	0	0	21	13	10	22	33	0	0	0	0	0	12	24	54	22	32	19	10	17	0	14
tRF#22-I89NJ4S2I	ATTGGTGGTTCAGTGGTAGAAT	5_tRF	0	0	0	0	0	22	32	29	25	11	11	0	0	0	41	19	0	70	0	0	0	43	0	11
tRF#18-YSQSD2D2	TTCCGGCTCGAAGGACCA	3_tRF	28	0	0	12.999	15.001	24.003	49	37.996	37.002	0	0	0	15.001	0	0	15.001	12.999	0	0	0	0	0	66.997	0
tRF#20-N1EH6KK8	CTGCCACGCGGGAGGCCCGG	i-tRF	33	0	0	27	32	10	17	38	22	0	0	56	0	0	0	15	0	10	0	28	0	12	0	13
tRF#26-7LQ673FJQ4D	GTGTAGCTCAGTGGTAGAGCGCGTGC	5_tRF	0	0	0	0	0	0	16.002	0	28.998	0	0	0	0	0	0	88.002	16.002	97.998	0	0	0	18	36	10.998
tRF#25-46S9Y8RH93	CTCCAGTCTCTTCGGGGGCGTGGGT	i-tRF	0	0	0	10.003	18.998	14	26.999	10.003	14	17.003	58.002	0	24.003	0	10.997	38.997	15.001	28	10.997	11.998	0	0	0	0
tRF#26-RK9P4P9L5HD	GGGGGTGTAGCTCAGTGGTAGAGCGC	5_tRF	10.998	11.997	0	12.996	0	36	11.997	0	0	0	0	0	0	0	62.001	39.996	40.995	70.002	0	0	0	10.998	0	0
tRF#27-08R959KUMKH	ACCGGGGTTCGATTCCCCGACGGGGAG	3_tRF	20	19	0	0	64	0	0	0	0	36	26	0	24	0	0	22	0	17	0	31	20	14	0	14
tRF#21-RK9P4P9L0	GGGGGTGTAGCTCAGTGGTAG	5_tRF	18	14	0	27	0	15	33	0	19	0	0	0	0	0	54	73	30	24	0	0	0	0	0	0
tRF#21-5P4PW3FJB	GATAGCTCAGTCGGTAGAGCA	i-tRF	37.002	0	0	0	0	0	19.999	14	11.998	0	24.003	24.997	0	18.998	28	24.003	0	0	86.002	0	0	0	17.003	0
tRF#50-RPM8309MUKLY5Z1IK3JZ	GGTAGCGTGGCCGAGTGGTCTAAGGCGCTGGATTTAGGCTCCAGTCATTT	5_tRF	0	0	82	18	0	0	0	0	0	0	0	0	12	0	54	26	0	0	0	0	77	16	0	21
tRF#30-V47P596VW631	TAGTGGTTAGGATTCGGCGCTCTCACCGCC	i-tRF	0	0	0	0	0	19	28	98	40	0	0	0	0	0	0	23	0	42	0	0	0	20	17	19
tRF#50-34HWH3RXSINHZ4PVFO3S	CCGTGATCGTATAGTGGTTAGTACTCTGCGTTGTGGCCGCAGCAACCTCG	5_tRF	0	0	20.997	0	0	0	0	0	44.001	0	11.997	0	146.997	0	56.997	0	0	0	0	0	11.997	0	0	11.997
tRF#32-L85DMKYOYRLH4	CGCGGGAGACCGGGGTTCAATTCCCCGACGGG	i-tRF	10	29	0	0	129	0	17	44	18	0	0	0	0	0	0	0	0	22	0	18	14	0	0	0
tRF#19-S3SJRXJ1	GTAGTGTAGCGGTTATCAC	i-tRF	0	0	0	33	0	0	0	0	12	0	16	42	36	17	46	0	26	10	0	27	0	0	36	0
tRF#25-18VBY9PYKH	AGTGGTAGAATTCTCGCCTGCCACG	i-tRF	10	15	0	0	20	20	33	34	21	0	0	39	11	0	0	60	0	19	0	0	0	0	18	0
tRF#35-V0JUO9YE4PRS93	TAGAGCATGAGACTCTTAATCTCAGGGTCGTGGGT	i-tRF	0	15.001	0	0	0	15.001	30.002	61.999	50.001	10.003	24.003	0	15.001	0	10.003	14	0	10.997	0	0	0	12.999	14	14
tRF#28-Z3R918VBY9DV	TTGGTGGTTCAGTGGTAGAATTCTCGCC	5_tRF	0	0	0	0	14	16	0	27	27	0	36	0	0	0	12	47	0	66	0	0	0	38	14	0
tRF#20-FMF0QV7N	AGATCAGAAGGCTGCGTGTT	i-tRF	0	0	0	0	11	32	20	33	16	0	0	0	0	0	11	46	22	76	0	0	0	20	10	0
tRF#20-87R8WP9N	TCCCTGGTGGTCTAGTGGTT	5_tRF	50	0	0	25	10	0	11	0	0	0	0	0	0	0	0	16	64	34	75	12	0	0	0	0
tRF#22-93Q01M3KQ	TGGGTGCGAGAGGTCCCGGGTT	i-tRF	15	0	0	0	10.002	12	25.002	43.002	70.002	0	0	0	0	0	0	30	0	42	0	0	0	31.998	0	16.998
tRF#50-IKMM4WVLV470VR3196L8	ATGGGCGGTCCTCGTTAGTATAGTGGTGAGTATCCCCGCCTGTCACGCGG	other	0	0	276	0	0	0	0	0	0	0	0	0	0	0	0	0	0	0	0	0	20	0	0	0
tRF#24-897PVP94FB	TCCTCGTTAGTATAGTGGTGAGTA	5_tRF	52	0	0	0	14	0	10	0	0	0	0	0	0	0	70	43	15	31	61	0	0	0	0	0
tRF#30-32VIJMRPFQJD	CCGGATAGCTCAGTCGGTAGAGCATCAGAC	5_tRF	0	0	0	0	0	13.002	22.002	74.004	40.002	0	0	0	0	0	0	31.002	0	46.998	0	0	0	24	28.002	16.002
tRF#30-389MV47P596V	CCTGGTGGTCTAGTGGTTAGGATTCGGCGC	5_tRF	10	0	0	0	0	0	0	48	26	0	0	0	0	0	49	23	19	15	77	28	0	0	0	0
tRF#22-W086W8RV2	TCGAGTCCCATCTGGGGTGCCA	3_tRF	0	0	0	0	0	47	37	53	18	0	0	0	0	0	0	41	0	20	0	28	0	14	36	0
tRF#34-3SY3H3RUSMKVHN	CCTCGTTAGTATAGTGGTGAGTATCCCCGCCTGT	5_tRNA_halve	12	0	0	0	0	0	0	0	0	14	17	0	0	0	61	61	35	46	14	10	10	0	13	0
tRF#23-R918VBY9DV	GGTTCAGTGGTAGAATTCTCGCC	i-tRF	0	0	0	0	0	18	31	36	29	0	0	0	10	11	27	57	0	45	0	0	0	11	18	0
tRF#23-1S91547OD9	AGTCGTGGCCGAGTGGTTAAGGC	5_tRF	12	0	0	0	55	0	0	0	0	11	0	75	0	13	40	42	0	16	0	0	0	18	11	0
tRF#25-QNR8ZP9LON	GCGTTGGTGGTTTAGTGGTAGAATT	5_tRF	0	0	0	16	10	0	0	0	0	0	29	0	14	0	35	17	63	53	0	12	0	12	31	0
tRF#21-69I19O860	GGCTCATGCCTGTAATCCCAG	3_U_tRF	31	0	0	0	14	0	0	0	0	0	0	0	0	0	215	16	0	0	16	0	0	0	0	0
tRF#25-N44S5N097Z	CTGTGCTCCGGAGTTACCTCGTTTT	3_U_tRF	26	0	0	0	15	70	53	34	77	0	0	0	0	0	0	0	16	0	0	0	0	0	0	0
tRF#24-9MVKS4I71W	TGGTCTAGGGGTATGATTCTCGCT	i-tRF	0	0	0	0	0	30	24	37	41	0	0	0	0	0	0	46	0	32	0	0	0	56	12	13
tRF#23-Y2R79K3B8	TTAGAGGTCTTGGGGCCGAAACG	5_U_tRF	88	0	0	0	147	26	11	0	0	0	0	0	0	0	0	0	0	0	0	0	0	19	0	0
tRF#22-1EWJQ72SJ	AGGATTCGGCGCTCTCACCGCC	i-tRF	11	0	0	0	0	40	22	52	69	0	0	0	0	0	0	37	0	15	0	0	0	33	12	0
tRF#37-JBRR93W0K672052	CAGAAGGTCCTGGGTTCGAGCCCCAGTGGAACCACCA	3_tRNA_halve	67.998	0	0	0	0	15.999	21.999	11.001	0	0	0	0	0	0	69	48	0	0	36.999	0	0	0	18.999	0
tRF#31-P4R8YP9LON4VD	GCATGGGTGGTTCAGTGGTAGAATTCTCGCC	5_tRF	11	0	0	0	0	0	10	68	27	0	38	10	16	13	25	27	0	13	17	0	0	14	0	0
tRF#26-SP58309MUKD	GTCAGGATGGCCGAGTGGTCTAAGGC	5_tRF	16	13	0	14	25	17	10	12	0	0	0	0	0	0	27	83	0	43	0	0	0	17	0	12
tRF#20-Y2R79K3B	TTAGAGGTCTTGGGGCCGAA	5_U_tRF	75	25	0	18	41	41	0	0	0	10	36	0	0	14	15	0	0	0	0	13	0	0	0	0
tRF#28-Q1Q89P9L84DF	GCGCCGCTGGTGTAGTGGTATCATGCAA	5_tRF	30	12	0	0	25	0	13	41	35	0	0	0	0	0	14	42	31	33	0	0	0	0	11	0
tRF#22-PW5SVP9NH	GCCGTGATCGTATAGTGGTTAG	5_tRF	17.001	0	0	0	24.003	107.001	0	41.004	19.998	0	0	0	0	0	0	0	0	32.004	34.002	0	0	10.998	0	0
tRF#22-9DH48V7KQ	TGGACATATGTCCGCGTGGGTT	i-tRF	0	0	0	0	0	21	22	27	61	0	0	0	0	0	0	13	0	26	0	12	0	37	26	41
tRF#50-1HK84J83ML5F924ZDRJK	AGGCGCCCGGCTAGCTCAGTCGGTAGAGCATGGGACTCTTAATCCCAGGG	other	19	0	187	18	0	0	0	0	0	0	0	0	0	0	0	0	0	0	0	0	61	0	0	0
tRF#26-MIF91SS2P40	CGGCTAGCTCAGTCGGTAGAGCATGG	5_tRF	0	0	0	0	0	0	21	39.999	36	0	0	0	0	0	12.999	67.002	0	60.999	0	0	0	20.001	14.001	12
tRF#42-9P9L8422YRI7XUK8N	TGTAGTGGTATCATGCAAGATTCCCATTCTTGCGACCCGGGT	i-tRF	0	18	11	0	0	0	32	15	18	0	82	0	33	0	10	0	0	0	0	0	33	14	0	18
tRF#27-735L8RPY8HK	GTGGTGAGTATCCCCGCCTGTCACGCG	i-tRF	23	22	0	18	60	0	32	19	25	0	23	14	0	0	0	0	12	0	0	10	0	12	0	14
tRF#22-K5YY0FYWQ	CCCACTTCTGACACATTCGTTT	3_U_tRF	0	30	0	23	25	40	0	0	17	0	0	0	0	0	21	36	63	29	0	0	0	0	0	0
tRF#25-BUW60XY9BI	AACGATCTCAACCTATTCTCAAACT	5_U_tRF	29	0	0	12	42	32	16	21	20	0	0	0	0	0	50	0	17	31	0	0	0	13	0	0
tRF#43-PNR8YP9LON4VN1EHDX	GCATTGGTGGTTCAGTGGTAGAATTCTCGCCTGCCACGCGGGA	5_tRF	0	12.999	0	17.003	0	0	10.003	0	14	0	93.002	0	33.999	0	26.999	0	10.997	0	0	0	35	16.002	0	11.998
tRF#29-JY7383RPD9JM	CATTGGTGGTTCAGTGGTAGAATTCTCGC	5_tRF	12	0	0	0	24	11	0	15	24	0	23	15	12	13	26	19	0	31	17	0	0	12	28	0
tRF#25-R959KUMKF6	GGTTCGATTCCCCGACGGGGAGCCA	3_tRF	0	0	0	18.996	0	30.996	30.996	18	27.996	0	0	0	0	0	0	0	15	0	0	54.996	0	24.996	50.004	9.996
tRF#27-N3S3RQJVDE5	CTGGTGTAGTGGTATCATGCAAGATTC	i-tRF	0	0	0	0	22	0	0	24	30	0	0	0	0	0	21	48	64	44	0	14	0	14	0	0
tRF#21-K34ZMKQ40	CCAGTCTCTTCGGGGGCGTGG	i-tRF	10.003	0	0	0	15.001	0	0	0	0	0	36.001	0	28	18.998	0	82.001	31.003	21	38.003	0	0	0	0	0
tRF#21-17NSRJ7KE	AGTCTCTTCGGGGGCGTGGGT	i-tRF	0	15.001	0	52.003	10.003	15.001	0	11.998	12.999	0	10.997	0	28	10.997	0	37.002	18.998	12.999	0	10.003	0	17.997	15.001	0
tRF#23-OUR8309NS	GACGAGGTGGCCGAGTGGTTAAG	5_tRF	0	0	0	0	10.003	18.998	10.003	37.002	51.002	0	0	0	11.998	10.003	43.001	28	0	0	0	0	0	29.001	14	11.998
tRF#32-Y2R79K3BEE4OJ	TTAGAGGTCTTGGGGCCGAAACGATCTCAACC	5_U_tRF	60	0	67	0	30	17	0	0	45	0	0	13	11	0	0	0	0	0	0	0	32	0	0	0
tRF#28-735L8RPY8HD4	GTGGTGAGTATCCCCGCCTGTCACGCGG	i-tRF	14	0	0	19	108	21	34	21	42	0	0	0	0	0	0	0	0	0	0	0	0	16	0	0
tRF#22-15VF7ZODQ	AGTACTAGCAGTTTTGAAACTT	3_U_tRF	0	0	0	0	0	19	0	0	16	52	0	0	31	46	0	11	0	64	0	0	0	35	0	0
tRF#20-WP9N1EWJ	TCTAGTGGTTAGGATTCGGC	i-tRF	10	0	0	0	21	13	12	35	0	0	0	0	0	0	21	11	86	0	54	11	0	0	0	0
tRF#50-I89NJ4S2I7L7P5QK11M3	ATTGGTGGTTCAGTGGTAGAATTCTCGCCTGCCACGCGGGAGGCCCGGGT	5_tRF	0	0	28	0	0	0	0	0	33.999	0	14	0	119	0	15.001	0	0	0	0	0	45.003	0	0	17.997
tRF#28-1MZKPUBUW6V	AGGTCTTGGGGCCGAAACGATCTCAACC	5_U_tRF	35	0	0	15	36	43	23	14	11	0	10	23	0	0	19	0	0	0	0	11	0	10	23	0
tRF#22-I2JQSSM8N	ATGGACATATGTCCGCGTGGGT	i-tRF	0	10	0	0	0	0	56	55	46	0	0	0	0	0	0	0	25	11	0	0	0	37	14	17
tRF#26-21V98BNXD80	CAACCTATTCTCAAACTTTAAATGGG	5_U_tRF	11	10	0	0	120	31	0	0	0	0	0	19	0	0	30	0	16	32	0	0	0	0	0	0
tRF#18-I958M80E	ATTTCGATGGCGTGGGTT	i-tRF	57	0	0	46	0	0	0	0	0	0	0	0	0	0	11	39	10	57	0	0	0	36	0	13
tRF#27-QNR8VP94FQH	GCGTTGGTGGTATAGTGGTGAGCATAG	5_tRF	16.002	15.001	0	10.997	17.997	16.002	23.002	10.997	23.002	0	0	0	0	0	45.997	10.997	31.003	17.997	0	0	0	18.998	10.997	0
tRF#26-RK9P4P9L5FD	GGGGGTGTAGCTCAGTGGTAGAGCAC	5_tRF	0	0	0	10	0	0	0	0	0	26	75	0	0	41	57	26	0	32	0	0	0	0	0	0
tRF#22-W1X6L85JJ	TCGCCTGCCACGCGGGAGGCCC	i-tRF	22	13	0	0	0	0	21	40	26	0	0	0	0	0	22	43	0	33	0	0	0	19	28	0
tRF#34-FJIKE7UMKKSWIZ	AGAGCATGGGACTCTTAATCCCAGGGTCGTGGGT	i-tRF	0	0	0	0	0	28	53	57	42	0	12	0	0	0	0	27	0	0	0	0	0	23	24	0
tRF#23-F91SS2P4X	AGCTCAGTCGGTAGAGCATGAGA	i-tRF	18	13	0	0	23	11	39	49	65	11	12	0	0	0	0	0	0	25	0	0	0	0	0	0
tRF#28-MXSL735L8RDV	CGTTAGTATAGTGGTGAGTATCCCCGCC	5_tRF	20	0	0	12	0	0	0	0	0	26	15	0	0	13	54	23	11	65	14	0	0	12	0	0
tRF#34-IEWSNYRV50SRIZ	ATGATTCTCGCTTTGGGTGCGAGAGGTCCCGGGT	i-tRF	0	15	0	0	0	19.998	22.998	12	28.998	0	0	0	0	0	43	50.998	0	16.002	0	0	0	22.002	22.998	10.998
tRF#24-QOUHK0SVIZ	GCTAATAACGCCAAGGTCGCGGGT	i-tRF	0	0	0	0	0	14	10	11	19	0	0	0	0	0	21	107	0	40	0	0	0	28	13	0
tRF#23-I89NJ4S2DE	ATTGGTGGTTCAGTGGTAGAATT	5_tRF	10	0	0	12	0	0	0	60	11	14	0	0	16	25	16	0	0	19	38	0	0	21	19	0
tRF#19-PS5P4PJ4	GCCCGGATAGCTCAGTCGG	5_tRF	144	58.998	0	58.002	0	0	0	0	0	0	0	0	0	0	0	0	0	0	0	0	0	0	0	0
tRF#26-38NJWHIM9ZE	CCTGGCTGGCTCGCGATGTCTGTTTT	3_U_tRF	11	0	0	0	0	27	10	0	25	0	0	0	0	0	70	31	18	65	0	0	0	0	0	0
tRF#25-RN2NKSEK51	GGGTTCAATTCCCCGACGGGGAGCC	3_tRF	15	0	0	0	0	0	0	0	0	26	0	0	41	10	17	0	0	0	95	52	0	0	0	0
tRF#22-3BEE4O3Q5	CCGAAACGATCTCAACCTATTC	5_U_tRF	22	0	0	0	23	24	12	11	29	0	23	0	10	11	34	16	0	12	0	0	0	27	0	0
tRF#34-L85DMKYOYRLHIX	CGCGGGAGACCGGGGTTCAATTCCCCGACGGGGA	3_tRNA_halve	20	0	0	0	0	0	0	0	0	29	0	0	47	0	26	0	0	0	37	73	20	0	0	0
tRF#30-R918VBY9PYKH	GGTTCAGTGGTAGAATTCTCGCCTGCCACG	i-tRF	0	13	0	0	10	0	21	15	24	0	0	0	0	0	0	46	17	46	0	0	0	41	19	0
tRF#20-O9337KB6	GACTCCCGGTGTGGGAACCA	3_tRF	21	0	0	19	11	38	40	23	34	0	0	0	16	0	0	0	0	14	0	14	0	0	22	0
tRF#21-87R8WP9NB	TCCCTGGTGGTCTAGTGGTTA	5_tRF	61	0	0	0	15	0	0	0	0	0	0	0	0	0	0	15	31	11	108	0	0	0	0	10
tRF#20-QNR8VP94	GCGTTGGTGGTATAGTGGTG	5_tRF	49	17.997	0	22.001	17.003	18.998	10.003	16.002	15.001	0	0	0	0	0	0	14	23.002	35	11.998	0	0	0	0	0
tRF#22-WR645J7KQ	TCTCCGGATGGAGGCGTGGGTT	i-tRF	14	0	0	0	0	18	10	27	56	0	0	0	0	0	0	28	0	14	12	0	0	46	25	0
tRF#24-LM8D4N4OEQ	CGATCTCAACCTATTCTCAAACTT	5_U_tRF	17	10	0	13	53	35	23	0	41	0	0	0	0	0	11	0	0	17	0	0	0	29	0	0
tRF#37-31QJ3KYUYRR6RBH	CCGCCGCGGCCCGGGTTCGATTCCCGGTCAGGGAAAG	3_tRNA_halve	36	0	0	0	0	0	0	0	0	41	61	0	100	0	0	0	0	0	10	0	0	0	0	0
tRF#19-OJR44ZFQ	GAAGCGGGTGCTCTTATTT	3_U_tRF	110	22	0	34	0	20	23	13	10	0	0	0	0	0	0	0	0	16	0	0	0	0	0	0
tRF#23-86N7O5IS0Q	TCCCACTTCTGACACATTCGTTT	3_U_tRF	0	23	0	19	17	36	0	0	12	0	0	0	0	0	20	31	69	19	0	0	0	0	0	0
tRF#22-LYKK7V97Q	CGCTGCCAGGGTTGCTGTCTTT	3_U_tRF	11	0	0	13	13	10	0	0	0	0	0	0	0	0	130	50	0	18	0	0	0	0	0	0
tRF#21-RW18V6XO0	GGTGTAGTGGTATCATGCAAG	i-tRF	17	13	0	0	31	12	11	33	17	0	10	0	0	0	34	55	0	0	12	0	0	0	0	0
tRF#20-8W1W18YM	TCCGTAGTGTAGTGGTTATC	5_tRF	19	0	0	16	0	10	0	0	0	0	0	0	0	0	29	56	0	39	60	0	0	15	0	0
tRF#23-34HWH3RX0B	CCGTGATCGTATAGTGGTTAGTA	5_tRF	0	0	0	0	12.996	11.997	0	0	27.999	0	0	0	0	12.996	57.996	0	0	17.001	102.996	0	0	0	0	0
tRF#21-3V2VR0PS0	CCTGCCACGCGGGAGGCCCGG	i-tRF	32	0	0	10	0	14	18	18	18	0	46	72	0	0	0	0	0	0	0	14	0	0	0	0
tRF#20-1QKS3W2V	AGTATCCCCGCCTGTCACGC	i-tRF	0	0	0	0	0	14	32	45	30	0	0	0	0	0	25	24	0	43	0	10	0	19	0	0
tRF#22-46S9Y8RHP	CTCCAGTCTCTTCGGGGGCGTG	i-tRF	0	0	0	0	12.999	0	25.998	21	21	22.001	31.003	10.997	12.999	0	19.999	31.997	0	19.999	0	0	0	0	11.998	0
tRF#19-YUYRLHIX	TTCGATTCCCCGACGGGGA	3_tRF	12	0	0	0	0	0	0	0	0	27.996	0	0	99.004	0	0	0	0	0	58.004	44	0	0	0	0
tRF#32-SP58309MUKL6L	GTCAGGATGGCCGAGTGGTCTAAGGCGCCAGA	5_tRF	0	10	0	0	35	0	13	22	0	0	0	0	0	0	31	73	21	22	0	0	0	14	0	0
tRF#33-QJ3KYUYRR6RBD2	GCGGCCCGGGTTCGATTCCCGGTCAGGGAACCA	3_tRF	17.001	0	0	0	0	21.996	11.997	16.002	14.004	18.999	16.002	0	26.001	16.002	18	0	0	24.003	0	0	0	11.997	27.999	0
tRF#19-88I26WIZ	TCCGGATGGAGGCGTGGGT	i-tRF	96	87	0	57	0	0	0	0	0	0	0	0	0	0	0	0	0	0	0	0	0	0	0	0
tRF#23-NQDVLKZ4Z	CTTATAATGCCGAGGTTGTGAGT	i-tRF	0	28	0	0	21	15	0	18	14	0	0	0	0	0	0	40	0	41	0	0	0	46	15	0
tRF#23-87R8WP9IY	TCCCTGGTGGTCTAGTGGCTAGG	5_tRF	36	0	0	0	0	10	0	0	0	0	0	0	12	0	17	110	0	21	15	0	0	0	17	0
tRF#23-6NMH490VDM	GGATTCGGCGCTCTCACCGCCGC	i-tRF	0	0	0	0	0	15	14	40	25	0	0	0	0	0	0	60	0	39	0	0	0	27	18	0
tRF#19-73V2Y81W	GTGGTTAGGATTCGGCGCT	i-tRF	107	36	0	16	0	0	0	0	0	0	0	0	0	0	17	0	47	0	0	15	0	0	0	0
tRF#26-1WSP58309ME	AGTGTGTCAGGATGGCCGAGTGGTCT	5_U_tRF	14	0	0	0	15	0	0	0	0	0	0	0	0	0	97	55	45	11	0	0	0	0	0	0
tRF#25-Q1Q89P9L84	GCGCCGCTGGTGTAGTGGTATCATG	5_tRF	44	0	0	0	11	0	0	0	0	0	0	0	0	0	20	45	0	17	66	0	0	0	22	12
tRF#34-I7XUK87SIRMJI8	ATTCTTGCGACCCGGGTTCGATTCCCGGGCGGCG	3_tRNA_halve	0	22	0	0	32	0	19	93	21	0	0	0	0	0	0	14	0	14	0	21	0	0	0	0
tRF#30-ZPQR17NSRJ7K	TTTAGGCTCCAGTCTCTTCGGGGGCGTGGG	i-tRF	0	11	0	0	0	0	0	0	0	16	60	0	35	14	12	50	0	24	0	0	0	13	0	0
tRF#50-897PVP9N1QKS3W2VR008	TCCTCGTTAGTATAGTGGTTAGTATCCCCGCCTGTCACGCGGGAGACCGG	5_tRF	0	0	38	0	0	0	0	0	28	0	0	0	41	0	10	0	0	0	0	0	117	0	0	0
tRF#43-QNR8VP9NFQFY392JZ	GCGTTGGTGGTATAGTGGTTAGCATAGCTGCCTTCCAAGCAGT	5_tRF	27	22	10	0	0	20	29	22	0	0	0	0	0	0	44	11	0	11	0	0	0	24	12	0
tRF#25-B7I72DZOIK	AACCTATTCTCAAACTTTAAATGGG	5_U_tRF	11	11	0	13	80	25	10	21	28	0	17	0	0	0	0	0	0	15	0	0	0	0	0	0
tRF#33-941QKS3W2VR0V	TGGTGAGTATCCCCGCCTGTCACGCGGGAGACC	i-tRF	0	0	0	0	0	0	29	43	0	0	0	0	0	0	20	30	0	38	0	0	0	35	19	15
tRF#19-NJWHIMKE	CTGGCTCGCGATGTCTGTT	3_U_tRF	98	38	0	50	0	28	0	0	15	0	0	0	0	0	0	0	0	0	0	0	0	0	0	0
tRF#20-P8SIYWIZ	GCCGGGTACTTTCGTATTTT	3_U_tRF	113	0	0	0	0	0	11	40	0	0	0	0	0	0	41	0	22	0	0	0	0	0	0	0
tRF#29-XUK87SIRMJI8	TGCGACCCGGGTTCGATTCCCGGGCGGCG	3_tRF	32	0	0	0	0	0	0	0	0	23	11	0	42	0	30	66	0	22	0	0	0	0	0	0
tRF#24-V4V47Q2WHM	TAGTGTAGTGGTTATCACGTCTGC	i-tRF	0	12	0	0	0	36	45	26	26	0	0	0	0	0	12	19	0	24	0	0	0	26	0	0
tRF#20-DRJFNY6K	AATCCCAGCACTTTGGGAGG	3_U_tRF	0	12.999	0	9.999	66	0	0	0	0	0	0	0	0	0	42.999	30	0	12.999	29.001	9.999	0	0	9.999	0
tRF#22-V47PU9XWP	TAGTGGTTAGTACTCTGCGTTG	i-tRF	0	18.999	0	0	0	16.002	32.004	54.999	48.996	0	0	0	0	0	0	10.998	15.003	9.999	0	0	0	16.002	0	0
tRF#21-9NH5SYNXD	TGGTTATCACGTCTGCTTTAC	i-tRF	0	16	0	0	0	23	34	39	26	0	0	0	0	0	0	18	10	12	0	0	0	32	0	13
tRF#19-W9RKM82Q	TCTTCGGGGGCGTGGGTTT	i-tRF	73	0	0	67	13	0	0	0	0	0	0	0	0	0	17	0	29	0	0	0	0	14	10	0
tRF#36-S4I7LZM3Q01M3KE	GTATGATTCTCGCTTCGGGTGCGAGAGGTCCCGGGT	i-tRF	0	24.999	0	0	0	18	36.999	33	27.999	0	0	0	0	0	21.999	24	0	11.001	0	0	0	24.999	0	0
tRF#24-9MVH7P59H4	TGGTCTAGCGGTTAGGATTCCTGG	i-tRF	0	11	0	0	0	19	37	40	57	0	0	0	0	0	0	31	0	12	0	0	0	15	0	0
tRF#30-QKF1R3WE8RO8	GCGGGAGACCGGGGTTCGATTCCCCGACGG	i-tRF	75	0	0	0	50	0	0	0	0	0	0	0	0	0	0	28	16	14	11	15	0	0	12	0
tRF#28-I7L7P5QK11D4	ATTCTCGCCTGCCACGCGGGAGGCCCGG	i-tRF	16	0	0	14	0	0	12	10	33	0	33	80	0	0	0	0	0	0	0	12	0	11	0	0
tRF#20-3K7SIR3D	CCGGGGTTCGATTCCCCGAC	i-tRF	14	0	0	0	0	0	0	0	0	0	0	0	0	0	18	21	17	13	113	25	0	0	0	0
tRF#20-1NQKYUSR	AGGTTGCGGGTTCGAGTCCC	i-tRF	0	0	0	0	14	0	0	0	0	0	11	0	0	69	0	0	0	23	0	90	0	0	14	0
tRF#22-PHP0R0ZWQ	GCACGGCAAGGGGAGTTTGTTT	3_U_tRF	0	0	0	19	10	15	0	0	0	0	0	0	0	0	43	20	32	58	0	0	0	10	0	12
tRF#24-YKIHFK8S2E	TTAGGATGCGAGAGGTCCCGGGTT	i-tRF	18	0	0	0	0	18	25	25	23	0	0	0	0	0	20	27	0	0	0	0	0	47	0	15
tRF#19-S3M830JZ	GTAGTCGTGGCCGAGTGGT	5_tRF	121	23	0	51	0	0	0	0	0	0	0	0	0	0	0	0	0	0	23	0	0	0	0	0
tRF#27-QJ3KYUYRR64	GCGGCCCGGGTTCGATTCCCGGTCAGG	i-tRF	41	0	0	0	26	0	0	36	10	0	0	0	0	0	16	45	12	17	14	0	0	0	0	0
tRF#19-R118LOJX	GGGCCAGTGGCGCAATGGA	5_tRF	115.003	100.002	0	0	0	0	0	0	0	0	0	0	0	0	0	0	0	0	0	0	0	0	0	0
tRF#22-BMFSENXZQ	AAATCAGCCGACGTTTGCTTTT	3_U_tRF	29	0	0	24	25	19	14	0	14	0	0	0	0	0	62	27	0	0	0	0	0	0	0	0
tRF#29-LM8D4N4OEZ07	CGATCTCAACCTATTCTCAAACTTTAAAT	5_U_tRF	11	0	18	24	17	28	0	10	27	0	0	0	0	0	13	0	19	0	0	0	0	31	15	0
tRF#21-WPRLXN4VE	TCTAGGGGTATGATTCTCGCT	i-tRF	15	0	0	0	14	13	17	36	21	0	0	0	0	0	14	17	0	32	0	0	0	20	0	11
tRF#23-6LQ6S8V0DI	GGATAGCTCAGTCGGTAGAGCAT	5_tRF	0	0	0	0	0	28	12.999	35	36.001	0	0	0	0	0	0	38.003	0	42	0	0	0	17.003	0	0
tRF#20-FEWS3V2V	AGAATTCTCGCCTGCCACGC	i-tRF	0	0	0	0	10	0	34	25	34	0	0	0	0	0	0	38	0	13	0	10	0	31	13	0
tRF#32-ZH0SR9593KMH2	TTGCGACCCGGGTTCGATTCCCGGGCGGCGCA	3_tRF	12	0	0	0	0	0	0	0	0	91	0	12	80	0	0	12	0	0	0	0	0	0	0	0
tRF#26-J4S2I7L7P50	CAGTGGTAGAATTCTCGCCTGCCACG	i-tRF	0	0	0	0	0	15	16	14	42	0	0	0	0	0	0	63	0	23	0	0	0	34	0	0
tRF#20-PZYU559Z	GCCTTTTCGAGATACTGTTT	3_U_tRF	32	0	0	0	0	48	10	15	19	0	0	0	0	0	20	15	0	38	0	0	0	10	0	0
tRF#20-WPRLXN48	TCTAGGGGTATGATTCTCGG	i-tRF	0	0	0	0	0	28	17	34	36	0	0	0	0	0	0	26	0	26	0	0	0	25	14	0
tRF#21-2EK8E0KRB	CAAATCCCGGACGAGCCCCCA	3_tRF	0	0	0	17.01	14.007	62.994	30.009	11.004	19.992	0	0	0	0	27.01	0	0	0	0	0	0	0	9.996	12.999	0
tRF#28-I89NJ4S2I7DM	ATTGGTGGTTCAGTGGTAGAATTCTCGC	5_tRF	0	0	0	0	25	17	11	15	18	0	0	0	0	0	41	34	0	18	11	0	0	0	15	0
tRF#24-I89NJ4S2F5	ATTGGTGGTTCAGTGGTAGAATTC	5_tRF	0	10	0	0	0	0	0	11	0	27	21	21	29	11	0	21	0	32	0	10	0	0	12	0
tRF#21-PZYU559ZE	GCCTTTTCGAGATACTGTTTT	3_U_tRF	17	0	0	0	0	35	11	25	30	0	0	0	0	0	34	16	0	12	0	0	0	25	0	0
tRF#41-87R8WP9N1EWJQ72SD	TCCCTGGTGGTCTAGTGGTTAGGATTCGGCGCTCTCACCGC	5_tRF	28	0	46	18	0	0	11	14	15	0	25	0	0	0	14	0	0	0	0	0	33	0	0	0
tRF#35-VUY9RZRML2RRM3	TATGATTCTCGGTTTGGGTCCGAGAGGTCCCGGGT	i-tRF	0	20	0	16	0	11	48	61	38	0	0	0	0	0	0	0	0	0	0	0	0	10	0	0
tRF#26-QR17NSRJ7KE	GCTCCAGTCTCTTCGGGGGCGTGGGT	i-tRF	0	0	0	14	15.001	0	10.997	0	0	24.997	0	0	18.998	0	28	59.003	0	21	11.998	0	0	0	0	0
tRF#21-L3KQNK71B	CGAGTCCCATCTGGGGTGCCA	3_tRF	13	0	0	28	0	46	19	32	16	0	0	13	0	0	0	0	10	0	0	11	0	0	15	0
tRF#25-QNR8VP94FQ	GCGTTGGTGGTATAGTGGTGAGCAT	5_tRF	15.001	0	0	12.999	21	29.001	18.998	24.997	25.998	0	0	0	0	0	19.999	0	23.002	11.998	0	0	0	0	0	0
tRF#25-R2IP4O73FJ	GGGGAATTAGCTCAAGTGGTAGAGC	5_tRF	0	0	0	0	0	0	16	0	0	66	0	0	0	0	0	0	0	66	0	0	0	0	54	0
tRF#28-PSQP4PW3FJD0	GCCCGGCTAGCTCAGTCGGTAGAGCATG	5_tRF	18	0	0	0	18	0	18	45	18.999	0	11.997	19.998	0	0	0	9.999	18.999	11.997	0	0	0	10.998	0	0
tRF#31-R9J89O9NF5W8B	GGTTCCATGGTGTAATGGTTAGCACTCTGGA	5_tRF	14	0	0	0	0	0	11.998	17.003	0	0	0	0	0	0	48.001	58.002	0	52.003	0	0	0	0	0	0
tRF#34-897PVP9N1QKS1P	TCCTCGTTAGTATAGTGGTTAGTATCCCCGCCTG	5_tRNA_halve	0	0	0	0	0	0	11	0	0	12	13	14	0	0	21	39	33	34	24	0	0	0	0	0
tRF#23-QNR8VP9L9	GCGTTGGTGGTATAGTGGTAAGC	5_tRF	20	17	0	0	0	38	32	40	14	0	0	0	0	0	0	30	10	0	0	0	0	0	0	0
tRF#35-5QKDN6QQ1362NZ	GATATCCAACCTTCAGCTATAGGGTGGAGACTTTT	3_U_tRF	0	11	0	0	0	43	0	44	23	0	0	0	0	0	30	37	0	12	0	0	0	0	0	0
tRF#24-18VBY9PY11	AGTGGTAGAATTCTCGCCTGCCAC	i-tRF	14	0	0	0	0	24	14	29	31	0	0	0	0	0	0	34	0	19	0	0	0	22	13	0
tRF#22-Z3R918VBQ	TTGGTGGTTCAGTGGTAGAATT	5_tRF	0	0	0	10	11	21	32	11	16	0	0	0	0	0	10	20	0	31	15	0	0	10	13	0
tRF#23-RK9P4P9LDS	GGGGGTGTAGCTCAGTGGTAGAG	5_tRF	0	21	0	10	10	33	0	0	10	11	0	0	0	14	15	36	0	24	15	0	0	0	0	0
tRF#19-Z87HFKJJ	TTTGGGTGCGAGAGGTCCC	i-tRF	111.002	40	0	37.002	0	0	0	0	0	0	0	0	0	0	0	0	0	10	0	0	0	0	0	0
tRF#23-R71KVUY9DW	GGTCTAGGGGTATGATTCTCGCT	i-tRF	0	0	0	0	0	19	17	27	17	0	0	0	0	0	0	29	0	58	0	0	0	21	0	10
tRF#26-3SY3H3RXSMD	CCTCGTTAGTATAGTGGTTAGTATCC	5_tRF	12	0	0	0	0	0	0	0	0	0	16	81	0	11	24	0	25	28	0	0	0	0	0	0
tRF#24-JY7383RPEE	CATTGGTGGTTCAGTGGTAGAATT	5_tRF	0	0	0	0	12	0	0	0	0	0	0	0	0	20	32	16	0	0	117	0	0	0	0	0
tRF#20-X6RNQWNZ	TGCCAGGGTTGCTGTCTTTT	3_U_tRF	25	0	0	0	22	11	0	14	13	0	0	0	0	0	45	34	0	20	13	0	0	0	0	0
tRF#27-V47P596VW6J	TAGTGGTTAGGATTCGGCGCTCTCACC	i-tRF	0	0	0	0	17	11	12	24	34	0	0	0	0	0	0	13	0	41	0	0	0	16	12	16
tRF#31-3SY3H3RUSMKVD	CCTCGTTAGTATAGTGGTGAGTATCCCCGCC	5_tRF	19	0	0	0	0	0	0	18	0	30	14	0	0	0	43	42	0	0	18	0	0	0	11	0
tRF#23-PS5P4PW3X	GCCCGGATAGCTCAGTCGGTAGA	5_tRF	49.002	0	0	0	16.998	0	16.998	15	15	0	0	0	0	0	0	0	0	0	82.002	0	0	0	0	0
tRF#23-1E6SF8WOD9	AGGATGGCCGAGCGGTCTAAGGC	5_tRF	0	0	0	0	0	0	9.999	0	0	0	0	0	0	0	15.003	103.995	10.998	9.999	0	0	0	0	45	0
tRF#18-YRR6RBD2	TTCCCGGTCAGGGAACCA	3_tRF	14	0	0	38	17	16	0	45	53	0	0	0	0	0	0	11	0	0	0	0	0	0	0	0
tRF#29-QKF1R3WE8RH8	GCGGGAGACCGGGGTTCGATTCCCCGACG	i-tRF	43	0	0	0	16	0	0	0	0	0	0	0	0	0	62	29	0	0	32	11	0	0	0	0
tRF#22-RX6NMH491	GGTTAGGATTCGGCGCTCTCAC	i-tRF	0	0	0	0	0	0	11	20	38	0	0	0	0	0	13	37	0	33	0	0	0	19	22	0
tRF#27-789LV470JP3	GTTGGTGGTATAGTGGTGAGCATAGCT	5_tRF	13.998	0	0	0	16.998	19.998	10.998	54	43.998	0	0	0	0	0	22.002	0	0	10.998	0	0	0	0	0	0
tRF#25-SL735L8RPY	GTATAGTGGTGAGTATCCCCGCCTG	i-tRF	0	0	0	0	11	0	0	13	0	0	0	0	0	0	15	74	12	43	0	13	0	11	0	0
tRF#27-389MV47P594	CCTGGTGGTCTAGTGGTTAGGATTCGG	5_tRF	0	0	0	11	15	0	0	35	16	0	0	0	0	0	13	18	27	14	10	20	12	0	0	0
tRF#20-21V98BNX	CAACCTATTCTCAAACTTTA	5_U_tRF	22	0	0	0	28	29	0	16	16	0	0	0	0	0	0	0	12	48	0	0	0	20	0	0
tRF#28-R29P4P9L5HDI	GGGGATGTAGCTCAGTGGTAGAGCGCAT	5_tRF	0	0	0	0	10.997	0	0	0	0	0	0	0	0	0	17.003	51.002	23.002	61.999	0	0	0	14	11.998	0
tRF#21-OJR44ZIZE	GAAGCGGGTGCTCTTATTTTT	3_U_tRF	0	0	0	0	0	37	39	53	26	0	0	0	0	0	0	24	11	0	0	0	0	0	0	0
tRF#19-F91SS2II	AGCTCAGTCGGTAGAGCAT	i-tRF	83	32	0	75	0	0	0	0	0	0	0	0	0	0	0	0	0	0	0	0	0	0	0	0
tRF#26-P4R8YP9LOND	GCATGGGTGGTTCAGTGGTAGAATTC	5_tRF	0	0	0	0	0	13	10	33	28	10	34	0	32	0	17	0	0	0	0	0	0	0	0	12
tRF#22-B7I72DZOI	AACCTATTCTCAAACTTTAAAT	5_U_tRF	0	0	0	17	14	23	0	0	25	0	0	0	0	0	10	0	42	47	0	0	0	11	0	0
tRF#21-WKM2736ZE	TCGGGCGGGAGTGGTGGCTTT	3_U_tRF	48	25	0	18	0	12	0	0	34	0	0	27	0	0	15	10	0	0	0	0	0	0	0	0
tRF#26-17JOWU1M70E	AGTCTCATAATCTGAAGGTCGTGAGT	i-tRF	10	11	0	0	0	0	17	15	23	0	0	0	0	0	0	34	0	27	0	0	0	20	31	0
tRF#23-K87SIRMMY	CCCGGGTTCGATTCCCGGTCAGG	i-tRF	35	11	0	0	24	0	0	19	10	0	0	0	0	0	33	23	0	17	16	0	0	0	0	0
tRF#48-PNR8YP9LON4VN1EH6KDJ	GCATTGGTGGTTCAGTGGTAGAATTCTCGCCTGCCACGCGGGAGGCCC	5_tRF	0	0	0	24.003	0	0	0	0	26.999	0	17.003	0	10.003	0	37.002	0	0	0	0	0	58.002	0	0	14
tRF#19-PPRYNMKQ	GCCAGGGTTGCTGTCTTTT	3_U_tRF	100	43	0	43	0	0	0	0	0	0	0	0	0	0	0	0	0	0	0	0	0	0	0	0
tRF#20-PUBUW60X	GCCGAAACGATCTCAACCTA	5_U_tRF	14	0	0	0	25	18	0	0	14	0	35	0	0	0	27	0	0	14	11	0	0	10	17	0
tRF#37-9EUK46S9Y8RH93Q	TGGATTAAGGCTCCAGTCTCTTCGGGGGCGTGGGTTT	i-tRF	35	15	0	42	0	0	0	0	0	0	0	0	0	0	51	13	18	0	0	0	0	10	0	0
tRF#32-3JH92EJ1OWZIQ	CCGGCATCTCCAAATCAGCCGACGTTTGCTTT	3_U_tRF	29	0	0	0	0	0	0	0	0	0	0	0	0	0	106	39	0	10	0	0	0	0	0	0
tRF#50-KY7343RX6NMH490VL8K8	CCCTGGTGGTCTAGTGGTTAGGATTCGGCGCTCTCACCGCCGCGGCCCGG	5_tRF	0	0	17	0	0	0	0	0	65	0	0	0	49	0	10	0	0	0	0	0	42	0	0	0
tRF#39-87R8WP9N1EWJQ7FV	TCCCTGGTGGTCTAGTGGTTAGGATTCGGCGCTCTCACC	5_tRNA_halve	0	18	0	0	31	17	43	45	29	0	0	0	0	0	0	0	0	0	0	0	0	0	0	0
tRF#19-PSQP4PJ4	GCCCGGCTAGCTCAGTCGG	5_tRF	69.003	51.003	0	62.001	0	0	0	0	0	0	0	0	0	0	0	0	0	0	0	0	0	0	0	0
tRF#37-Y2R79K3BEE4O3Q5	TTAGAGGTCTTGGGGCCGAAACGATCTCAACCTATTC	5_U_tRF	37	0	69	0	15	0	0	0	18	0	0	0	0	0	31	0	0	0	0	0	12	0	0	0
tRF#25-LM8D4N4OEZ	CGATCTCAACCTATTCTCAAACTTT	5_U_tRF	0	0	0	13	18	27	12	0	36	0	0	0	0	0	10	0	22	29	0	0	0	15	0	0
tRF#25-MEF91SS2PM	CGGATAGCTCAGTCGGTAGAGCATC	5_tRF	0	0	0	16.002	0	19.002	19.998	28.998	13.002	0	0	0	0	0	10.002	30	0	31.998	0	0	0	0	12	0
tRF#28-R1RXQ678Y2D8	GGGCCGGTTAGCTCAGTTGGTTAGAGCG	5_tRF	0	0	0	24	0	0	0	0	0	10	26	0	10	0	13	13	0	60	0	0	0	10	15	0
tRF#20-R11EXBNZ	GGGCCAGGATTGAAACTTTT	3_U_tRF	25	0	0	0	0	0	0	0	0	0	0	0	0	0	103	29	0	24	0	0	0	0	0	0
tRF#30-H9B7I72DZOIK	ATCTCAACCTATTCTCAAACTTTAAATGGG	5_U_tRF	34	0	0	13	39	18	0	0	13	0	13	13	0	0	25	0	0	0	0	0	0	12	0	0
tRF#21-69E19O860	GGCTCACGCCTGTAATCCCAG	3_U_tRF	9.999	0	0	0	16	0	0	0	0	0	0	0	0	0	143.999	0	0	9.999	0	0	0	0	0	0
tRF#38-Z46DD8282K69RQ0Q	TTGTGGGAACAATGGCACGGCAAGGGGCTCGGTATTTT	3_U_tRF	10	36	41	0	0	0	25	0	0	0	0	0	0	0	44	11	11	0	0	0	0	0	0	0
tRF#23-WYL1M3WE0J	TCTTGCGACCCGGGTTCGATTCC	i-tRF	16	16	0	0	10	13	0	93	30	0	0	0	0	0	0	0	0	0	0	0	0	0	0	0
tRF#22-WKM2736ZQ	TCGGGCGGGAGTGGTGGCTTTT	3_U_tRF	57	0	0	20	0	13	34	18	36	0	0	0	0	0	0	0	0	0	0	0	0	0	0	0
tRF#23-DRFU8U767	AATCCAGCGATCCGAGTTCAAAT	i-tRF	38	17	0	0	0	14	0	0	25	0	0	0	12	0	10	11	12	0	0	0	0	25	13	0
tRF#21-QP4PW3FJB	GCTAGCTCAGTCGGTAGAGCA	i-tRF	12	0	0	0	0	11	14	29	25	0	24	0	0	0	0	0	0	37	0	0	0	14	11	0
tRF#49-PS5U8918W8RV1I8B3WEW	GCCCGGATGATCCTCAGTGGTCTGGGGTGCAGGCTTCAAACCTGTAGCT	5_tRF	0	0	27	0	0	0	0	0	0	0	0	0	15	0	67	0	0	0	0	0	67	0	0	0
tRF#29-87R8WP9I1EJ4	TCCCTGGTGGTCTAGTGGCTAGGATTCGG	5_tRF	20	0	0	0	51	0	0	22	0	0	0	0	0	0	54	29	0	0	0	0	0	0	0	0
tRF#22-Y2R79K3B1	TTAGAGGTCTTGGGGCCGAAAC	5_U_tRF	14	0	0	0	74	23	0	0	14	0	16	0	0	0	25	0	0	0	0	10	0	0	0	0
tRF#35-1HPSR9O9337KB6	AGGCGGCCCGGGTTCGACTCCCGGTGTGGGAACCA	3_tRF	0	0	0	11	0	27	33	41	14	0	0	0	0	0	22	0	0	0	0	0	0	10	17	0
tRF#31-QNR8VP9LFQFYD	GCGTTGGTGGTATAGTGGTAAGCATAGCTGC	5_tRF	0	10	0	0	0	20	15	45	14	0	0	0	0	0	30	21	0	0	0	0	0	17	0	0
tRF#20-MJJ2ZBEZ	CGGGCCAGGATTGAAACTTT	3_U_tRF	24	0	0	23	0	0	0	0	0	0	0	0	0	0	54	26	13	32	0	0	0	0	0	0
tRF#22-R3HJ83RPH	GGGGTATAGCTCAGTGGTAGAG	5_tRF	0	10.003	0	10.997	0	0	0	26.999	15.001	0	0	0	0	0	17.003	30.002	12.999	22.001	0	0	0	15.001	10.997	0
tRF#36-LSM1M3WE8SSP6B0	CGCCGCGGCCCGGGTTCGATTCCCGGTCAGGGAAAG	3_tRNA_halve	33	0	0	0	0	0	0	0	0	38	25	0	75	0	0	0	0	0	0	0	0	0	0	0
tRF#26-87R8WP9I1EE	TCCCTGGTGGTCTAGTGGCTAGGATT	5_tRF	36	0	0	0	0	0	0	0	0	0	0	0	0	0	30	78	0	14	13	0	0	0	0	0
tRF#24-RW18V6XOIE	GGTGTAGTGGTATCATGCAAGATT	i-tRF	26	0	0	0	0	0	0	20	0	0	0	0	0	0	47	61	0	16	0	0	0	0	0	0
tRF#19-QNR8VPJZ	GCGTTGGTGGTATAGTGGT	5_tRF	90	25.002	0	54	0	0	0	0	0	0	0	0	0	0	0	0	0	0	0	0	0	0	0	0
tRF#31-LM8D4N4OEZB40	CGATCTCAACCTATTCTCAAACTTTAAATGG	5_U_tRF	0	0	0	18	14	21	0	10	21	0	0	0	0	0	0	0	0	14	0	22	0	48	0	0
tRF#23-LYKK7V970Q	CGCTGCCAGGGTTGCTGTCTTTT	3_U_tRF	16	0	0	10	0	18	0	10	0	0	0	0	0	0	71	28	15	0	0	0	0	0	0	0
tRF#18-7383RP7	GTGGTTCAGTGGTAGAAT	i-tRF	0	0	0	0	0	0	24	16	39	0	0	0	0	0	0	15	13	11	0	0	0	18	19	13
tRF#50-R2LW947L735FJIPZ80JN	GGGGACGCGTTGGTGGTGTAGTGGTGAGCACAGCTGCCTTTCAAGCAGTT	other	0	0	121	0	0	0	0	0	0	0	0	0	0	0	0	0	0	0	0	0	46	0	0	0
tRF#31-5721V98BNXD80	GATCTCAACCTATTCTCAAACTTTAAATGGG	5_U_tRF	15	0	17	0	37	17	0	0	18	0	17	18	0	0	0	0	0	0	0	0	0	28	0	0
tRF#19-W7WK6WIZ	TCTCTTCGGGGGCGTGGGT	i-tRF	56	45.003	0	65.002	0	0	0	0	0	0	0	0	0	0	0	0	0	0	0	0	0	0	0	0
tRF#23-9M8O90Q4DZ	TGGTCTCCAATGGAGGCGTGGGT	i-tRF	0	0	0	0	0	32	33	11	12	0	0	0	0	0	26	23	0	0	0	0	0	14	15	0
tRF#22-RW18V6XOL	GGTGTAGTGGTATCATGCAAGA	i-tRF	23	0	0	0	15	16	0	0	11	0	0	0	0	0	0	11	23	20	10	0	0	22	0	15
tRF#21-SXR3IEWSD	GTCTAGGGGTATGATTCTCGC	i-tRF	0	0	0	0	0	0	16	24	12	0	0	0	0	0	0	24	0	19	0	0	0	48	12	11
tRF#36-VUY9Q9R4L2RRM3E	TATGATTCTCGCTTCGGGTGCGAGAGGTCCCGGGTT	i-tRF	0	12	0	9.999	0	17.001	24.999	56.001	33	0	0	0	0	0	12.999	0	0	0	0	0	0	0	0	0
tRF#50-R0LR6LQ6S8V0J6OZYEN0	GGGAGCGCCCGGATAGCTCAGTCGGTAGAGCATCAGACTTTTAATCTGAG	other	21	0	14	13	0	26	36	25	16	0	0	0	0	0	14	0	0	0	0	0	0	0	0	0
tRF#25-N3R718YKIS	CTGGTGGTCTAGTGGTTAGGATTCG	5_tRF	12	0	0	26	0	0	0	0	21	0	0	0	0	0	0	16	31	17	0	0	0	16	26	0
tRF#22-79MP9PMNI	GTTTCCGTAGTGTAGCGGTTAT	5_tRF	0	0	0	0	0	0	13	24	12	0	0	0	0	0	48	0	0	24	19	0	0	0	15	10
tRF#25-735L8RPY8H	GTGGTGAGTATCCCCGCCTGTCACG	i-tRF	0	11	0	11	36	0	21	56	29	0	0	0	0	0	0	0	0	0	0	0	0	0	0	0
tRF#50-H0JY7383RPD9W1X6L85J	ATAAGCATTGGTGGTTCAGTGGTAGAATTCTCGCCTGCCACGCGGGAGGC	other	0	0	114	10	0	0	0	0	0	0	0	0	0	0	0	0	0	0	0	0	39	0	0	0
tRF#30-FKWYR1OD5721	AGAGGTCTTGGGGCCGAAACGATCTCAACC	5_U_tRF	10	0	0	0	31	0	0	0	0	0	25	22	0	0	24	19	18	13	0	0	0	0	0	0
tRF#19-Y2R79K1L	TTAGAGGTCTTGGGGCCGA	5_U_tRF	0	0	0	0	28	13	0	10	21	0	25	0	0	12	0	0	18	12	0	0	0	22	0	0
tRF#41-V470VR3196L85DMKE	TAGTGGTGAGTATCCCCGCCTGTCACGCGGGAGACCGGGGT	i-tRF	0	17	0	0	0	0	24	13	0	0	58	0	0	0	24	0	0	0	0	0	0	12	0	11
tRF#22-DRFU8U76F	AATCCAGCGATCCGAGTTCAAA	i-tRF	20	21	0	0	0	0	0	0	0	29	44	23	10	0	0	0	0	0	0	12	0	0	0	0
tRF#21-P8SIYWIZE	GCCGGGTACTTTCGTATTTTT	3_U_tRF	43	0	0	0	0	24	12	33	27	0	0	0	0	0	20	0	0	0	0	0	0	0	0	0
tRF#32-86J8WPMN1E8YN	TCCCACATGGTCTAGCGGTTAGGATTCCTGGT	5_tRF	12	13	0	0	0	0	15	16	0	0	0	0	0	0	36	26	0	11	29	0	0	0	0	0
tRF#30-PSQP4PW3FJI0	GCCCGGCTAGCTCAGTCGGTAGAGCATGAG	5_tRF	15	13.998	0	0	0	0	0	13.998	15	0	28	54	0	0	0	18	0	0	0	0	0	0	0	0
tRF#39-PW5SVP9N15WV7WIV	GCCGTGATCGTATAGTGGTTAGTACTCTGCGTTGTGGCC	5_tRNA_halve	11.997	12.996	0	0	25.002	11.997	26.001	36.999	18	0	0	0	0	0	0	0	0	15.003	0	0	0	0	0	0
tRF#27-BHH9B7I72DQ	AAACGATCTCAACCTATTCTCAAACTT	5_U_tRF	0	0	0	13	21	19	23	12	12	0	0	0	0	0	0	0	14	26	0	0	0	17	0	0
tRF#27-79MP9P9NH5N	GTTTCCGTAGTGTAGTGGTTATCACGT	5_tRF	0	0	0	0	0	0	0	53	0	15	0	0	0	0	17	33	0	26	13	0	0	0	0	0
tRF#30-PSR95933JKB6	GCCCGGGTTCGATTCCCGGTCAGGGAACCA	3_tRF	9.999	0	0	0	0	11.997	9.999	11.997	17.001	9.999	18.999	12.996	0	0	16.002	0	0	37.998	0	0	0	0	0	0
tRF#19-59KUMKEV	GATTCCCCGACGGGGAGCC	3_tRF	122.004	11.004	0	23.004	0	0	0	0	0	0	0	0	0	0	0	0	0	0	0	0	0	0	0	0
tRF#21-6XQ6S8V0D	GGCTAGCTCAGTCGGTAGAGC	5_tRF	20.997	0	0	25.002	0	0	0	15.003	0	0	11.997	0	15.003	0	0	27.999	0	16.002	24.003	0	0	0	0	0
tRF#34-9EYK46S9Y8RHJY	TGGATTTAGGCTCCAGTCTCTTCGGGGGCGTGGG	i-tRF	0	27	0	15	0	0	0	0	0	10	39	0	0	10	0	55	0	0	0	0	0	0	0	0
tRF#29-Y2R79K3BEEH2	TTAGAGGTCTTGGGGCCGAAACGATCTCA	5_U_tRF	14	0	40	0	49	0	0	10	0	0	0	0	0	0	14	0	0	0	0	0	18	11	0	0
tRF#30-4WVLV470VR31	CTCGTTAGTATAGTGGTGAGTATCCCCGCC	5_tRF	23	0	0	0	0	0	0	0	0	54	31	0	0	27	0	0	0	19	0	0	0	0	0	0
tRF#26-08R9D9KUMKB	ACCGGGGTTCAATTCCCCGACGGGGA	3_tRF	20	0	0	0	0	0	0	0	0	13	0	0	17	0	0	24	0	0	38	42	0	0	0	0
tRF#22-RKIP4OI3H	GGGGGATTAGCTCAAATGGTAG	5_tRF	0	0	0	0	19	0	0	0	15	0	0	0	0	0	15	0	0	42	10	0	0	39	0	14
tRF#32-31QJ3KYUYRR64	CCGCCGCGGCCCGGGTTCGATTCCCGGTCAGG	i-tRF	32	10	0	0	15	0	0	11	11	0	0	0	0	0	33	22	0	19	0	0	0	0	0	0
tRF#21-LMK8J7K1B	CGATCCCCGGCATCTCCACCA	3_tRF	0	0	0	0	0	14	46	13	18	12	11	0	0	14	0	10	0	0	0	0	0	0	14	0
tRF#30-QKF1R38E8RO8	GCGGGAGACCGGGGTTCAATTCCCCGACGG	i-tRF	30	0	0	0	45	0	0	0	0	0	0	11	0	0	24	20	0	11	0	10	0	0	0	0
tRF#34-QNR8VP94FQFY1Q	GCGTTGGTGGTATAGTGGTGAGCATAGCTGCCTT	5_tRNA_halve	0	13.998	0	0	0	12	46.002	22.998	18	0	0	0	0	0	0	0	0	36	0	0	0	0	0	0
tRF#30-R3SJ83RPFV7I	GGGGTGTAGCTCAGTGGTAGAGCGCGTGCT	5_tRF	0	0	0	0	0	0	0	0	0	0	0	0	0	0	48	48	13.002	39	0	0	0	0	0	0
tRF#20-HJ83ML5F	ATAGCTCAGTCGGTAGAGCA	i-tRF	10.003	0	0	0	0	0	0	0	0	22.995	35	15.001	0	10.003	10.003	0	0	34.993	0	0	0	0	10.003	0
tRF#26-32VIJMRPFQD	CCGGATAGCTCAGTCGGTAGAGCATC	5_tRF	0	0	0	0	0	0	13.998	39	15	0	0	0	0	0	21	21	0	22.998	0	0	0	15	0	0
tRF#22-MEF91SS2M	CGGATAGCTCAGTCGGTAGAGC	5_tRF	0	0	0	10.002	0	13.002	0	12	0	0	10.002	0	0	16.002	0	10.002	10.002	13.002	40.002	0	0	0	13.002	0
tRF#36-Y2R79K3BEE4O3QE	TTAGAGGTCTTGGGGCCGAAACGATCTCAACCTATT	5_U_tRF	14	0	64	0	0	0	0	0	21	0	0	0	0	0	21	0	0	0	0	0	27	0	0	0
tRF#29-PUBUW60XY90R	GCCGAAACGATCTCAACCTATTCTCAAAC	5_U_tRF	12	0	0	0	18	0	0	0	0	13	22	36	0	11	18	0	0	17	0	0	0	0	0	0
tRF#23-W60XY9BI0O	TCTCAACCTATTCTCAAACTTTA	5_U_tRF	10	0	0	19	12	29	0	0	0	0	0	0	0	0	19	0	12	29	0	0	0	17	0	0
tRF#32-D9W1X6L85J3KQ	AATTCTCGCCTGCCACGCGGGAGGCCCGGGTT	i-tRF	11	0	0	0	0	15	17	21	24	0	0	0	0	0	0	26	0	21	0	0	0	11	0	0
tRF#24-HRE9XFJ92Q	ATCCCACTTCTGACACATTCGTTT	3_U_tRF	0	16	0	22	10	23	0	0	12	0	0	0	0	0	16	11	20	14	0	0	0	0	0	0
tRF#18-1I63P3D9	AGGCTGGAGTGCAGTGGC	3_U_tRF	0	0	39	10	0	0	0	0	16	0	0	0	0	0	0	0	0	0	0	0	78	0	0	0
tRF#26-RN2NKSEK51B	GGGTTCAATTCCCCGACGGGGAGCCA	3_tRF	0	0	0	0	0	10	0	13	22	0	0	0	0	0	0	0	21	18	0	34	0	0	24	0
tRF#34-P4R8YP9LON4VHM	GCATGGGTGGTTCAGTGGTAGAATTCTCGCCTGC	5_tRNA_halve	0	0	0	0	0	0	13	35	20	0	0	0	0	0	33	27	0	0	0	0	0	13	0	0
tRF#30-IEWSNYRV50SR	ATGATTCTCGCTTTGGGTGCGAGAGGTCCC	i-tRF	0	0	0	0	0	0	10.998	12	24	0	0	0	0	0	16.998	24	0	22.002	0	0	0	15	0	16.002
tRF#20-25RJ0EDZ	CACACGGGGCACAATAATTT	3_U_tRF	0	0	0	18	0	41	10	16	12	0	0	0	0	0	0	22	0	0	0	0	0	0	22	0
tRF#26-789LV470JPD	GTTGGTGGTATAGTGGTGAGCATAGC	5_tRF	19.002	0	0	12	10.002	16.002	0	13.998	24	0	0	0	0	0	10.002	13.002	0	22.002	0	0	0	0	0	0
tRF#34-VUY9RZRML2RR1Y	TATGATTCTCGGTTTGGGTCCGAGAGGTCCCGGG	i-tRF	0	64	0	20	0	0	17	18	21	0	0	0	0	0	0	0	0	0	0	0	0	0	0	0
tRF#28-7RH3SJRX8H03	GTTCCATAGTGTAGCGGTTATCACGTCT	5_tRF	33	0	0	0	34	0	0	20	29	0	0	0	0	0	0	0	0	13	0	0	0	0	11	0
tRF#31-ZPQR16ZSIJ7KE	TTTAGGCTCCAGTCATTTCGATGGCGTGGGT	i-tRF	0	0	0	0	0	0	0	0	0	0	0	0	0	0	0	52	0	48	0	0	0	25	14	0
tRF#33-EH623K76IR3DDY	ACGCGGGAGACCGGGGTTCAATTCCCCGACGGG	i-tRF	0	19	0	0	70	0	10	28	11	0	0	0	0	0	0	0	0	0	0	0	0	0	0	0
tRF#20-9L5HMVYV	TGGTAGAGCGCGTGCTTCGC	i-tRF	28	17	0	0	0	0	0	0	0	0	0	0	0	0	0	69	0	13	0	0	0	0	10	0
tRF#21-PS5P4PW3B	GCCCGGATAGCTCAGTCGGTA	5_tRF	49.998	0	0	0	0	0	0	0	0	0	0	0	0	0	19.002	0	0	0	67.998	0	0	0	0	0
tRF#34-IEWSNSRV50SRIZ	ATGATTCTCGCTTCGGGTGCGAGAGGTCCCGGGT	i-tRF	0	11.001	0	0	0	11.001	26.001	20.001	24.999	0	0	0	0	0	18	12.999	0	0	0	0	0	12	0	0
tRF#33-K8J7KB8JLHZV0Q	CCCGGCATCTCCAAATCAGCCGACGTTTGCTTT	3_U_tRF	22	0	0	0	19	0	0	0	0	0	0	0	0	0	70	15	0	10	0	0	0	0	0	0
tRF#39-QNR8VP94FQFY39FS	GCGTTGGTGGTATAGTGGTGAGCATAGCTGCCTTCCAAG	5_tRNA_halve	0	10.002	0	0	28.002	0	25.998	54	16.998	0	0	0	0	0	0	0	0	0	0	0	0	0	0	0
tRF#20-DRFU8U76	AATCCAGCGATCCGAGTTCA	i-tRF	37	23	0	0	0	0	0	0	0	14	0	27	15	19	0	0	0	0	0	0	0	0	0	0
tRF#47-34HWH3RXSINHZ4PVFOJ	CCGTGATCGTATAGTGGTTAGTACTCTGCGTTGTGGCCGCAGCAACC	5_tRF	0	0	10.998	0	0	0	0	0	0	0	50.004	0	52.002	0	19.998	0	0	0	0	0	0	0	0	0
tRF#21-WRD81H93E	TCTCCAATGGAGGCGTGGGTT	i-tRF	0	0	0	0	0	11	16	11	24	11	0	0	13	0	10	13	0	10	0	0	0	0	13	0
tRF#20-X3HRL7S5	TGAGTATCCCCGCCTGTCAC	i-tRF	0	0	0	0	0	0	16	19	27	0	0	0	0	0	0	0	10	12	0	0	0	19	29	0
tRF#30-J09HJHOJ7IR1	CAGAGTGGCGCAGCGGAAGCGTGCTGGGCC	5_tRF	0	0	0	0	0	0	0	0	0	0	0	0	0	11.997	59.006	10.998	0	27.999	0	11.997	0	0	9.999	0
tRF#35-VBY9PYKHM26RRN	TAGAATTCTCGCCTGCCACGCGGGAGGCCCGGGTT	i-tRF	0	29	0	0	0	0	26	17	41	0	0	0	0	0	0	0	0	18	0	0	0	0	0	0
tRF#28-N3R718YKISD8	CTGGTGGTCTAGTGGTTAGGATTCGGCG	5_tRF	15	12	0	0	0	11	10	14	21	0	0	0	0	0	0	22	12	0	14	0	0	0	0	0
tRF#20-BHH9B7I7	AAACGATCTCAACCTATTCT	5_U_tRF	13	0	0	0	19	19	11	15	15	0	0	0	0	0	0	0	0	13	0	0	0	14	12	0
tRF#50-7EMQ18Y3E7QN7JLP21W3	GTGATCGTATAGTGGTTAGTACTCTGCGTTGTGGCCGCAGCAACCTCGGT	5_tRF	0	0	16.002	0	0	0	0	0	0	0	0	0	96.003	0	18	0	0	0	0	0	0	0	0	0
tRF#21-3K7SIR3D0	CCGGGGTTCGATTCCCCGACG	i-tRF	13	0	0	20	0	0	0	0	0	0	0	0	0	0	0	12	12	0	39	20	14	0	0	0
tRF#20-D6PUMZQZ	AATCAGCCGACGTTTGCTTT	3_U_tRF	33	21	0	0	0	0	0	12	0	0	0	0	0	0	34	17	0	12	0	0	0	0	0	0
tRF#26-I89NJ4S2I7D	ATTGGTGGTTCAGTGGTAGAATTCTC	5_tRF	0	0	0	0	0	0	0	27	0	0	0	53	20	0	0	0	0	27	0	0	0	0	0	0
tRF#19-3L7L73JD	CCGTAGTGTAGTGGTTATC	5_tRF	127	0	0	0	0	0	0	0	0	0	0	0	0	0	0	0	0	0	0	0	0	0	0	0
tRF#43-7L73HQP0IRJ9ZH0SDZ	GTGTAGTGGTATCATGCAAGATTCCCATTCTTGCGACCCGGGT	i-tRF	0	0	16	0	0	0	14	0	0	0	23	0	11	0	30	0	0	0	0	0	22	0	0	10
tRF#42-4KRQ59WIZKXU53K8N	CTAGGGGTATGATTCTCGCTTTGGGTGCGAGAGGTCCCGGGT	i-tRF	0	13	0	0	0	0	17	11	11	0	13	0	0	0	35	0	0	0	0	0	0	13	0	13
tRF#23-YUYRRHQFD2	TTCGATTCCCGGGCGGCGCACCA	3_tRF	0	0	0	10	13	23	0	0	12	17	0	0	0	0	0	11	0	0	0	10	0	15	15	0
tRF#32-SP5830MMUKLYK	GTCAGGATGGCCGAGCGGTCTAAGGCGCTGCG	5_tRF	0	11.997	0	0	15.003	0	0	9.999	12.996	0	9.999	0	0	0	0	40.995	0	9.999	0	0	0	15.003	0	0
tRF#29-RPM830MMUK1W	GGTAGCGTGGCCGAGCGGTCTAAGGCGCT	5_tRF	0	9.999	0	0	0	0	0	0	0	0	24.003	0	0	0	23.004	18	10.998	25.002	0	0	0	0	14.004	0
tRF#25-XN4VZ87HFK	TGATTCTCGCTTTGGGTGCGAGAGG	i-tRF	13.002	13.002	0	0	0	0	0	19.002	16.002	0	0	0	0	0	0	40.998	0	11	0	0	0	12	0	0
tRF#28-RX6NMH490VDM	GGTTAGGATTCGGCGCTCTCACCGCCGC	i-tRF	0	0	0	0	0	13	10	34	30	0	0	0	0	0	0	26	0	12	0	0	0	0	0	0
tRF#20-735L8RPY	GTGGTGAGTATCCCCGCCTG	i-tRF	0	10	0	0	0	0	15	0	0	0	0	0	10	0	0	19	19	17	14	20	0	0	0	0
tRF#20-6XQ6S8V0	GGCTAGCTCAGTCGGTAGAG	5_tRF	9.999	0	0	0	0	10.998	16.002	24.003	0	0	0	0	0	0	12.996	27	11.997	0	0	0	0	0	10.998	0
tRF#21-KY7343RX0	CCCTGGTGGTCTAGTGGTTAG	5_tRF	18	0	0	0	0	0	0	0	0	0	0	0	0	0	0	19	0	0	34	52	0	0	0	0
tRF#49-3L7L73V6M9P90HLBRR14	CCGTAGTGTAGTGGTTATCACGTTCGCCTCACACGCGAAAGGTCCCCGG	5_tRF	0	0	15.003	0	0	0	0	0	36.999	0	9.999	0	28.998	0	20.997	0	0	0	0	0	10.998	0	0	0
tRF#28-R9JP9PMNH50D	GGTTCCATAGTGTAGCGGTTATCACGTC	5_tRF	54	0	0	0	0	12	18	0	0	0	0	0	0	0	14	12	0	11	0	0	0	0	0	0
tRF#19-ERM492E2	ACTCCCGGTGTGGGAACCA	3_tRF	40	29	0	51	0	0	0	0	0	0	0	0	0	0	0	0	0	0	0	0	0	0	0	0
tRF#28-P4R8YP9LOND5	GCATGGGTGGTTCAGTGGTAGAATTCTC	5_tRF	0	0	0	0	18	0	0	29	20	0	36	16	0	0	0	0	0	0	0	0	0	0	0	0
tRF#50-PSQP4PW3FJIKE7UMKKSW	GCCCGGCTAGCTCAGTCGGTAGAGCATGGGACTCTTAATCCCAGGGTCGT	5_tRF	0	0	17	0	0	0	0	0	22	0	0	0	42	0	17	0	0	0	0	0	20	0	0	0
tRF#27-7PVP941QKSJ	GTTAGTATAGTGGTGAGTATCCCCGCC	i-tRF	16	0	0	0	10	0	0	0	0	0	0	0	11	21	30	16	0	14	0	0	0	0	0	0
tRF#23-254PD3450Q	CACACCTCAGAAGGTCTCACTTT	3_U_tRF	14	0	0	0	0	0	0	0	0	0	0	0	0	0	22	12	19	51	0	0	0	0	0	0
tRF#20-9JQKZLEZ	TGGGCGCGGGTTGTAACTTT	3_U_tRF	62	0	0	0	0	0	0	0	10	0	0	0	0	0	19	0	27	0	0	0	0	0	0	0
tRF#19-DRFU8U25	AATCCAGCGATCCGAGTTC	i-tRF	52	32	0	34	0	0	0	0	0	0	0	0	0	0	0	0	0	0	0	0	0	0	0	0
tRF#35-ZH0SR9593KMH26	TTGCGACCCGGGTTCGATTCCCGGGCGGCGCACCA	3_tRF	19	0	0	0	0	13	0	0	0	12	0	0	14	0	29	17	0	0	0	0	0	0	12	0
tRF#21-HJ839L5FE	ATAGCTCAGTTGGTAGAGCAT	i-tRF	0	0	0	0	0	0	0	0	0	12	54	0	0	0	11	0	0	29	0	0	0	0	10	0
tRF#32-6S7P4PZ3V0M8P	GGCCGGTTAGCTCAGTTGGTTAGAGCGTGGTG	5_tRF	0	16	0	0	0	0	0	0	0	0	0	0	0	0	0	0	0	69	0	0	0	17	13	0
tRF#20-W60XY9BI	TCTCAACCTATTCTCAAACT	5_U_tRF	17	0	0	11	0	25	0	0	15	0	0	0	0	0	0	0	17	30	0	0	0	0	0	0
tRF#40-2S3HPSR95933JKB6	CACCGCCGCGGCCCGGGTTCGATTCCCGGTCAGGGAACCA	3_tRNA_halve	0	0	0	0	0	0	27	37.998	11.997	0	21.996	0	0	0	14.004	0	0	0	0	0	0	0	0	0
tRF#23-21V98BNX7	CAACCTATTCTCAAACTTTAAAT	5_U_tRF	0	0	0	11	13	14	0	0	0	0	0	0	0	0	14	0	30	30	0	0	0	0	0	0
tRF#21-OD5721V9E	GAAACGATCTCAACCTATTCT	5_U_tRF	16	0	0	0	18	18	11	0	16	0	0	0	0	0	0	0	19	14	0	0	0	0	0	0
tRF#21-9LON4VN1B	TGGTAGAATTCTCGCCTGCCA	i-tRF	0	0	0	0	0	16	34	15	28	0	0	0	0	0	0	18	0	0	0	0	0	0	0	0
tRF#22-PS5P4PW3H	GCCCGGATAGCTCAGTCGGTAG	5_tRF	0	0	0	12	0	15	13.002	10.998	0	0	0	0	0	22.998	10.002	10.002	0	0	0	0	0	16.002	0	0
tRF#20-PS5P4PW3	GCCCGGATAGCTCAGTCGGT	5_tRF	24	0	0	15	0	0	0	0	0	0	0	0	0	0	0	19.998	0	0	51	0	0	0	0	0
tRF#21-947673FEE	TGGTGGTTCAGTGGTAGAATT	5_tRF	14.55	0	0	0	0	0	0	0	0	0	0	0	0	0	11.82	0	0	27.27	42.73	0	0	0	12.73	0
tRF#20-4E8BR9M3	CTAATTCAAAGGTTCCGGGT	i-tRF	0	0	0	0	0	10	0	0	0	0	0	0	0	0	0	21	0	22	0	0	0	32	24	0
tRF#25-5721V98BNX	GATCTCAACCTATTCTCAAACTTTA	5_U_tRF	0	0	0	12	24	25	0	0	0	0	0	0	0	0	0	0	0	19	0	10	0	18	0	0
tRF#19-R29P4PJZ	GGGGATGTAGCTCAGTGGT	5_tRF	63	16	0	29	0	0	0	0	0	0	0	0	0	0	0	0	0	0	0	0	0	0	0	0
tRF#21-HJX78OP3E	ATAGCTGCCTTCCAAGCAGTT	i-tRF	26	0	0	0	35	22	0	13	0	0	0	0	0	0	0	0	0	0	0	0	0	0	11	0
tRF#19-Z3R9182X	TTGGTGGTTCAGTGGTAGA	5_tRF	28	30	0	49	0	0	0	0	0	0	0	0	0	0	0	0	0	0	0	0	0	0	0	0
tRF#29-K87SERM492E2	CCCGGGTTCGACTCCCGGTGTGGGAACCA	3_tRF	0	0	0	10	12	0	0	0	0	0	0	0	0	0	16	0	0	14	0	12	0	20	22	0
tRF#21-45N2P4Z9E	CTCACCTGGAGCATGTTTTCT	3_U_tRF	0	0	0	0	19	0	0	11	19	0	0	0	0	0	13	0	0	22	0	0	0	21	0	0
tRF#31-LSM1M3WE8SSP0	CGCCGCGGCCCGGGTTCGATTCCCGGTCAGG	i-tRF	36	12	0	0	20	0	10	15	0	0	0	0	0	0	0	11	0	0	0	0	0	0	0	0
tRF#18-SRHYR4D2	GTCCCATCTGGGGTGCCA	3_tRF	10	0	0	10	0	33	10	0	0	0	0	0	0	0	0	0	0	0	0	0	0	10	31	0
tRF#37-Z46DD8282K69RQQ	TTGTGGGAACAATGGCACGGCAAGGGGCTCGGTATTT	3_U_tRF	0	31	25	0	0	0	0	0	0	0	0	0	0	0	36	0	11	0	0	0	0	0	0	0
tRF#49-Z3R918VBY9PYKHM26RIZ	TTGGTGGTTCAGTGGTAGAATTCTCGCCTGCCACGCGGGAGGCCCGGGT	5_tRF	0	0	10.997	0	0	0	0	0	19.999	0	0	0	0	0	31.003	0	0	0	0	0	22.001	0	0	18.998
tRF#20-K8E0KPQZ	CCCGGACGAGCCCAGGCTTT	3_U_tRF	10	0	0	0	0	12	0	0	0	0	0	0	0	0	30	10	0	40	0	0	0	0	0	0
tRF#27-N3WE884U1D2	CTGGTTCGATTCCGGCTCGAAGGACCA	3_tRF	0	0	0	0	0	13.002	16.002	0	13.002	0	0	0	0	0	0	19.002	0	0	0	0	0	13.002	26.004	0
tRF#29-I89NJ4S2I71V	ATTGGTGGTTCAGTGGTAGAATTCTCGCC	5_tRF	0	0	0	0	0	0	0	0	0	10	11	27	0	0	36	16	0	0	0	0	0	0	0	0
tRF#23-LNK8KEP00Q	CGATTCCCGGCCAATGCAAGTTT	3_U_tRF	11	0	0	0	16	0	0	0	0	0	0	0	0	0	0	21	36	16	0	0	0	0	0	0
tRF#35-YSV4V47Q2WW18F	TTCCGTAGTGTAGTGGTTATCACGTTCGCCTCACA	5_tRNA_halve	0	0	9.999	0	0	0	12.996	43.002	23.004	0	0	0	0	0	0	0	0	0	0	0	0	0	10.998	0
tRF#23-SP5830MM0F	GTCAGGATGGCCGAGCGGTCTAA	5_tRF	12.996	0	0	0	0	0	0	16.002	10.998	0	0	0	0	0	0	19.998	0	17.001	0	0	0	0	23.004	0
tRF#19-UMX0SWHZ	TAATCTGAAGGTCGTGAGT	i-tRF	66	33	0	0	0	0	0	0	0	0	0	0	0	0	0	0	0	0	0	0	0	0	0	0
tRF#29-789LV470JPHM	GTTGGTGGTATAGTGGTGAGCATAGCTGC	5_tRF	0	0	0	0	10.002	15	12	0	13.998	0	0	0	0	0	0	0	0	19.998	0	0	0	10.998	16.998	0
tRF#31-L85DMKYUYRLH0	CGCGGGAGACCGGGGTTCGATTCCCCGACGG	i-tRF	12	14	0	0	0	0	0	0	0	0	0	0	0	0	0	18	0	0	0	30	24	0	0	0
tRF#24-PUBUW60XK3	GCCGAAACGATCTCAACCTATTCT	5_U_tRF	0	0	0	0	0	18	0	0	0	0	16	0	15	11	15	0	0	23	0	0	0	0	0	0
tRF#22-RQ18XJHJP	GGTATAGTGGTGAGCATAGCTG	i-tRF	0	0	0	0	12	16.998	25.002	0	19.998	0	0	0	0	0	0	10.002	0	13.002	0	0	0	0	0	0
tRF#30-PUBUW60XY9BI	GCCGAAACGATCTCAACCTATTCTCAAACT	5_U_tRF	0	0	0	0	15	16	0	10	0	0	0	22	0	11	13	0	0	10	0	0	0	0	0	0
tRF#27-Y2R79K3BEE3	TTAGAGGTCTTGGGGCCGAAACGATCT	5_U_tRF	0	0	22	0	10	12	0	0	0	0	0	0	0	0	0	0	10	0	0	0	43	0	0	0
tRF#30-ZH0SR9593KMH	TTGCGACCCGGGTTCGATTCCCGGGCGGCG	3_tRF	16	0	0	0	0	0	0	0	0	15	0	0	14	0	0	41	0	10	0	0	0	0	0	0
tRF#29-4W9MVKS4I71W	CTCGTTGGTCTAGGGGTATGATTCTCGCT	5_tRF	0	0	0	0	0	0	0	0	0	0	0	0	0	0	0	17	0	79	0	0	0	0	0	0
tRF#32-EH623K7SIR3D4	ACGCGGGAGACCGGGGTTCGATTCCCCGACGG	i-tRF	0	24	0	0	0	0	0	0	0	0	0	0	0	0	0	32	10	0	0	29	0	0	0	0
tRF#19-RHM39OHQ	GGGCGCGGGTTGTAACTTT	3_U_tRF	95	0	0	0	0	0	0	0	0	0	0	0	0	0	0	0	0	0	0	0	0	0	0	0
tRF#43-QNR8VP94FQFY392JZ	GCGTTGGTGGTATAGTGGTGAGCATAGCTGCCTTCCAAGCAGT	5_tRF	19.002	21	0	0	0	0	19.002	24	0	0	0	0	0	0	10.998	0	0	0	0	0	0	0	0	0
tRF#31-OR183O9EDJHPD	GACCCAGTGGCCTAATGGATAAGGCATCAGC	5_tRF	10	23	0	0	0	0	24	14	12	0	0	0	0	0	0	0	0	0	0	0	0	10	0	0
tRF#19-73V6M9I3	GTGGTTATCACGTTCGCCT	i-tRF	13	0	0	0	16	0	0	0	0	0	0	0	0	0	29	0	35	0	0	0	0	0	0	0
tRF#39-QP4PW3FJIKE7UM1H	GCTAGCTCAGTCGGTAGAGCATGGGACTCTTAATCCCAG	i-tRF	15.999	0	0	0	0	0	0	15	0	0	0	0	0	0	9.999	15.999	0	24	0	0	0	12	0	0
tRF#20-9EDJSYIR	TGGATAAGGCGTCTGATTCC	i-tRF	15.999	14.001	0	0	0	12	0	9.999	0	0	0	0	0	0	0	29.001	0	0	0	0	0	11.001	0	0
tRF#34-Y2R79K3BEE4O1O	TTAGAGGTCTTGGGGCCGAAACGATCTCAACCTA	5_U_tRF	14	0	24	0	10	0	0	0	20	0	0	0	0	0	0	0	0	0	0	0	24	0	0	0
tRF#29-1IK34ZMKQ42E	AGGCTCCAGTCTCTTCGGGGGCGTGGGTT	i-tRF	19.999	0	0	0	0	0	0	0	0	0	0	0	16.002	0	40.005	15.001	0	0	0	0	0	0	0	0
tRF#23-MY6VRNSD0Q	CGTTGGGCGCGGGTTGTAACTTT	3_U_tRF	11	0	0	0	12	14	0	0	0	0	0	0	0	0	26	0	16	12	0	0	0	0	0	0
tRF#19-NZL2UYKQ	CTTTTCGAGATACTGTTTT	3_U_tRF	44	22	0	25	0	0	0	0	0	0	0	0	0	0	0	0	0	0	0	0	0	0	0	0
tRF#39-PNR8YP9LON4VN1EM	GCATTGGTGGTTCAGTGGTAGAATTCTCGCCTGCCACGC	5_tRNA_halve	0	10.997	0	0	10.997	10.003	11.998	36.001	0	0	0	0	0	0	0	0	0	0	0	0	0	10.997	0	0
tRF#37-5QKDN6QQ1362NZO	GATATCCAACCTTCAGCTATAGGGTGGAGACTTTTTA	3_U_tRF	0	0	0	0	0	16	0	30	20	0	0	0	0	0	11	0	0	13	0	0	0	0	0	0
tRF#32-K5I34JRX6N38Q	CCCACATGGTCTAGCGGTTAGGATTCCTGGTT	5_tRF	26	0	0	0	0	0	0	0	0	0	0	0	0	0	27	17	0	0	20	0	0	0	0	0
tRF#29-M2OSRNLNKSE4	CGGGAGACCGGGGTTCGATTCCCCGACGG	i-tRF	16	0	0	0	0	0	0	0	0	0	0	0	0	0	12	0	0	19	0	30	13	0	0	0
tRF#28-MY73H3RUPLDW	CGTTGGTGGTATAGTGGTGAGCATAGCT	5_tRF	12	0	0	0	10.002	12	0	18	24	0	0	13.002	0	0	0	0	0	0	0	0	0	0	0	0
tRF#26-Y2R79K3BEED	TTAGAGGTCTTGGGGCCGAAACGATC	5_U_tRF	16	0	25	0	29	0	0	0	0	0	0	0	0	0	0	0	0	0	0	0	19	0	0	0
tRF#19-P4R8YPJZ	GCATGGGTGGTTCAGTGGT	5_tRF	33	38	0	18	0	0	0	0	0	0	0	0	0	0	0	0	0	0	0	0	0	0	0	0
tRF#19-IRMM12E2	ATTCCCGGTCAGGGAACCA	3_tRF	41	14	0	34	0	0	0	0	0	0	0	0	0	0	0	0	0	0	0	0	0	0	0	0
tRF#19-FP18LP1X	AGCAGAGTGGCGCAGCGGA	5_tRF	62.001	10.998	0	15.003	0	0	0	0	0	0	0	0	0	0	0	0	0	0	0	0	0	0	0	0
tRF#26-QNR8VP9LFQB	GCGTTGGTGGTATAGTGGTAAGCATA	5_tRF	13	0	0	0	0	0	14	0	0	0	0	0	0	0	22	19	0	20	0	0	0	0	0	0
tRF#25-R9O9337KB6	GGTTCGACTCCCGGTGTGGGAACCA	3_tRF	0	0	0	11	0	17	35	0	15	0	0	0	0	0	0	0	0	0	0	0	0	0	10	0
tRF#20-VIPZK0JN	TAGCTGCCTTCCAAGCAGTT	i-tRF	0	0	0	0	17	29	18	0	0	0	0	0	0	0	12	0	0	0	0	0	0	0	12	0
tRF#19-R8YP9LH7	GGTGGTTCAGTGGTAGAAT	i-tRF	35	25	0	18	0	0	0	0	0	0	10	0	0	0	0	0	0	0	0	0	0	0	0	0
tRF#26-94SX7JV2Y8D	TGGTGGTCTAGTGGCTAGGATTCGGC	5_tRF	17	15	0	0	0	0	13	0	22	0	0	0	0	0	10	10	0	0	0	0	0	0	0	0
tRF#20-R8YP9LON	GGTGGTTCAGTGGTAGAATT	i-tRF	11	0	0	0	0	0	0	10	0	0	0	0	0	0	0	19	0	12	35	0	0	0	0	0
tRF#24-7SERM492E2	GTTCGACTCCCGGTGTGGGAACCA	3_tRF	0	0	0	14	0	20	32	0	0	0	0	0	0	0	0	0	0	0	0	0	0	0	20	0
tRF#20-31QJ3KYU	CCGCCGCGGCCCGGGTTCGA	i-tRF	0	0	0	0	0	0	0	0	0	22	20	0	22	22	0	0	0	0	0	0	0	0	0	0
tRF#28-V0SZRJLBLM02	TAGAGGTCTTGGGGCCGAAACGATCTCA	5_U_tRF	12	0	0	0	21	0	13	0	0	0	0	0	0	0	0	0	14	0	0	0	0	25	0	0
tRF#20-097JPERP	ACCTCGTGGCGCAATGGTAG	5_tRF	16	0	0	0	0	0	0	0	0	14	0	45	0	0	0	0	0	10	0	0	0	0	0	0
tRF#19-OD5721JE	GAAACGATCTCAACCTATT	5_U_tRF	85	0	0	0	0	0	0	0	0	0	0	0	0	0	0	0	0	0	0	0	0	0	0	0
tRF#21-V98BNXD80	TATTCTCAAACTTTAAATGGG	5_U_tRF	29	0	0	0	29	0	0	0	0	0	0	0	0	0	15	11	0	0	0	0	0	0	0	0
tRF#38-Y2R79K3BEE4O3Q03	TTAGAGGTCTTGGGGCCGAAACGATCTCAACCTATTCT	5_U_tRF	0	0	58	0	0	0	0	0	0	0	0	0	0	0	0	0	0	0	0	0	25	0	0	0
tRF#28-L8K87SIRMMY	CGCGGCCCGGGTTCGATTCCCGGTCAGG	i-tRF	28	0	0	0	0	0	0	11	0	21	0	0	0	0	0	13	0	0	10	0	0	0	0	0
tRF#46-897PVP941QKS3W2VR0B	TCCTCGTTAGTATAGTGGTGAGTATCCCCGCCTGTCACGCGGGAGA	5_tRF	0	0	14	0	0	0	0	0	13	0	0	0	0	0	0	0	0	0	0	0	41	0	0	14
tRF#19-UMX0S7HZ	TAATCTGAAGGTCCTGAGT	i-tRF	48	15	0	19	0	0	0	0	0	0	0	0	0	0	0	0	0	0	0	0	0	0	0	0
tRF#42-YDLBRY73W0K5KKOV2	TTAACCGAAAGGTTGGTGGTTCGAGCCCACCCAGGGACGCCA	3_tRNA_halve	0	10.998	0	0	0	0	17.001	11.997	23.004	0	0	0	0	0	18.999	0	0	0	0	0	0	0	0	0
tRF#25-NJ9ILU977Z	CTGGCTGGCTCGCGATGTCTGTTTT	3_U_tRF	10	0	0	0	0	10	0	0	14	0	0	0	0	0	23	24	0	0	0	0	0	0	0	0
tRF#19-3290Q42E	CCGGATGGAGGCGTGGGTT	i-tRF	44	13	0	0	0	0	0	0	0	0	0	0	0	0	0	0	0	0	14	10	0	0	0	0
tRF#24-H9B7I72DKO	ATCTCAACCTATTCTCAAACTTTA	5_U_tRF	0	0	0	11	13	0	0	0	11	0	14	0	0	0	0	0	0	19	0	0	0	12	0	0
tRF#23-RPM8309M0F	GGTAGCGTGGCCGAGTGGTCTAA	5_tRF	0	0	0	0	10	24	0	20	26	0	0	0	0	0	0	0	0	0	0	0	0	0	0	0
tRF#21-KIWU2QWNE	CCACTTCTGACACATTCGTTT	3_U_tRF	0	0	0	0	0	0	0	0	0	0	0	0	0	0	51	17	12	0	0	0	0	0	0	0
tRF#22-W60XY9BIQ	TCTCAACCTATTCTCAAACTTT	5_U_tRF	0	0	0	0	16	0	0	0	17	0	0	0	0	0	0	0	0	36	0	0	0	10	0	0
tRF#21-73FJQ4NSD	GTGGTAGAGCGCGTGCTTCGC	i-tRF	21	16	0	0	0	0	0	0	0	0	0	0	0	0	0	17	0	0	0	0	0	13	12	0
tRF#29-735L8RPY8H1Y	GTGGTGAGTATCCCCGCCTGTCACGCGGG	i-tRF	0	0	0	0	54	0	0	12	12	0	0	0	0	0	0	0	0	0	0	0	0	0	0	0
tRF#26-M1M3WE8SSP0	CGGCCCGGGTTCGATTCCCGGTCAGG	i-tRF	25	0	0	0	0	0	0	13	0	0	0	0	0	0	19	0	0	11	10	0	0	0	0	0
tRF#19-RUSMKVHN	GGTGAGTATCCCCGCCTGT	i-tRF	28	40	0	0	0	0	0	0	0	0	0	0	0	0	0	0	0	10	0	0	0	0	0	0
tRF#19-79MP9PJZ	GTTTCCGTAGTGTAGTGGT	5_tRF	50	10	0	18	0	0	0	0	0	0	0	0	0	0	0	0	0	0	0	0	0	0	0	0
tRF#30-V2Y8L981PV6R	TAGGATTCGGCGCTCTCACCGCCGCGGCCC	i-tRF	0	0	0	0	0	0	0	14	24	0	0	0	0	0	0	13	0	11	0	0	0	0	15	0
tRF#23-YUYSQSD2D2	TTCGATTCCGGCTCGAAGGACCA	3_tRF	0	0	0	0	0	13	14	0	11	0	0	0	0	0	0	14	0	0	0	0	0	0	25	0
tRF#22-6LQ6S8V02	GGATAGCTCAGTCGGTAGAGCA	5_tRF	0	0	0	0	0	0	0	10.003	0	0	0	0	0	0	0	11.998	0	15.001	39.998	0	0	0	0	0
tRF#21-SY3RYJP3B	GTCTGCCTCCTTAGCGCAGTA	5_U_tRF	14	63	0	0	0	0	0	0	0	0	0	0	0	0	0	0	0	0	0	0	0	0	0	0
tRF#34-5721V98BNXD8IF	GATCTCAACCTATTCTCAAACTTTAAATGGGCAA	5_U_tRF	0	0	16	13	17	15	0	0	0	0	0	0	0	0	0	0	0	15	0	0	0	0	0	0
tRF#30-1WSP58309MUK	AGTGTGTCAGGATGGCCGAGTGGTCTAAGG	5_U_tRF	0	14	0	0	0	0	0	34	16	0	0	0	0	0	0	0	12	0	0	0	0	0	0	0
tRF#26-QSZ34KRQ59E	GCTCGTTGGTCTAGGGGTATGATTCT	5_tRF	18	0	0	0	0	14	0	0	18	0	0	0	0	0	0	0	0	26	0	0	0	0	0	0
tRF#47-F91SS2P46INO86RM7KQ	AGCTCAGTCGGTAGAGCATGGGACTCTTAATCCCAGGGTCGTGGGTT	i-tRF	0	0	12.999	11.001	0	0	0	0	21	0	0	0	0	0	0	0	0	0	0	0	30.999	0	0	0
tRF#22-N3R718YKI	CTGGTGGTCTAGTGGTTAGGAT	5_tRF	11	0	0	0	0	0	0	14	23	0	0	0	0	0	0	0	0	0	15	0	0	0	0	11
tRF#45-PNR8YP9LON4VN1EH6K	GCATTGGTGGTTCAGTGGTAGAATTCTCGCCTGCCACGCGGGAGG	5_tRF	0	0	12.999	0	0	0	0	0	0	0	14	0	0	0	32.998	0	0	0	0	0	14	0	0	0
tRF#24-Y2R79K3BEL	TTAGAGGTCTTGGGGCCGAAACGA	5_U_tRF	0	10	20	0	29	0	0	0	0	0	14	0	0	0	0	0	0	0	0	0	0	0	0	0
tRF#19-RPD9W1JV	GGTAGAATTCTCGCCTGCC	i-tRF	46	13	0	14	0	0	0	0	0	0	0	0	0	0	0	0	0	0	0	0	0	0	0	0
tRF#19-RK9P4PJZ	GGGGGTGTAGCTCAGTGGT	5_tRF	37	19	0	17	0	0	0	0	0	0	0	0	0	0	0	0	0	0	0	0	0	0	0	0
tRF#28-FP18LPMBQ4DP	AGCAGAGTGGCGCAGCGGAAGCGTGCTG	5_tRF	11.997	0	0	0	0	0	0	0	0	0	0	0	0	0	16.002	31.995	0	0	11.997	0	0	0	0	0
tRF#19-F8DHXYIV	AGCGGAAGCGTGCTGGGCC	i-tRF	0	0	0	0	0	0	0	0	0	0	0	0	0	0	0	0	50	11	0	10	0	0	0	0
tRF#29-53N86SBHH90V	GAGGTCTTGGGGCCGAAACGATCTCAACC	5_U_tRF	0	0	0	0	13	17	0	0	0	0	18	22	0	0	0	0	0	0	0	0	0	0	0	0
tRF#19-B1RHODE2	AAACCGGGCGGAAACACCA	3_tRF	0	10	0	0	0	0	0	0	10	0	0	0	0	0	15.008	12	0	0	0	0	0	0	12.992	10
tRF#50-EJZM4WVLV470VR3196L8	ACGGCTTGTCCTCGTTAGTATAGTGGTGAGTATCCCCGCCTGTCACGCGG	other	0	0	57	0	0	0	0	0	0	0	0	0	0	0	0	0	0	0	0	0	12	0	0	0
tRF#34-VL4YMY91PJB71Z	TAGTACTCTGCGTTGTGGCCGCAGCAACCTCGGT	i-tRF	0	16.002	0	0	0	0	0	15.003	12.996	0	9.999	14.004	0	0	0	0	0	0	0	0	0	0	0	0
tRF#19-FY392JFE	AGCTGCCTTCCAAGCAGTT	i-tRF	45	12	0	11	0	0	0	0	0	0	0	0	0	0	0	0	0	0	0	0	0	0	0	0
tRF#20-PW5SVP9N	GCCGTGATCGTATAGTGGTT	5_tRF	0	0	0	0	0	0	0	0	0	14.004	20.997	0	10.998	0	9.999	0	0	11.997	0	0	0	0	0	0
tRF#18-SR99RHD2	GTCCCTGTTCGGGCGCCA	3_tRF	13.998	0	0	10.002	0	10.998	0	16.002	16.002	0	0	0	0	0	0	0	0	0	0	0	0	0	0	0
tRF#22-WEF9FYS2M	TCGATAGCTCAGCTGG-TAGAGC	5_tRF	0	0	0	0	18	0	0	0	0	0	16	0	0	0	0	0	0	15	0	0	0	0	18	0
tRF#44-PNR8YP9LON4VN1EHIS	GCATTGGTGGTTCAGTGGTAGAATTCTCGCCTGCCACGCGGGAG	5_tRF	11.998	14	10.997	0	0	0	0	0	0	0	30.002	0	0	0	0	0	0	0	0	0	0	0	0	0
tRF#25-Y2R79K3BEE	TTAGAGGTCTTGGGGCCGAAACGAT	5_U_tRF	0	0	21	0	0	0	0	0	0	0	0	0	0	0	0	0	0	0	0	0	45	0	0	0
tRF#22-7I32754WQ	GTGCTCCGGAGTTACCTCGTTT	3_U_tRF	0	0	0	0	0	21	0	13	32	0	0	0	0	0	0	0	0	0	0	0	0	0	0	0
tRF#34-HM21YP4LR45DKQ	ATATCCAACCTTCAGCTATAGGGTGGAGACTTTT	3_U_tRF	0	0	0	0	0	17	0	21	0	0	0	0	0	0	15	12	0	0	0	0	0	0	0	0
tRF#21-4N4OEZB40	CTATTCTCAAACTTTAAATGG	5_U_tRF	0	0	0	0	0	0	0	0	0	0	0	27	0	0	16	0	0	12	0	0	0	0	10	0
tRF#16-Y63ZMJ0	TTCCACCTTTCGGGCG	3_tRF	0	0	0	31	0	0	0	0	0	0	0	0	0	0	0	34	0	0	0	0	0	0	0	0
tRF#38-KPQJ3KYU4RRWRBD2	CCCAGGCGGCCCGGGTTCGACTCCCGGTGTGGGAACCA	3_tRNA_halve	10	0	0	0	0	0	0	0	0	0	0	0	0	0	30	0	0	0	12	0	0	0	12	0
tRF#28-Y2R79K3BEED5	TTAGAGGTCTTGGGGCCGAAACGATCTC	5_U_tRF	0	0	23	0	19	0	0	0	0	0	0	0	0	0	0	0	0	0	0	0	10	12	0	0
tRF#19-KHM26RIZ	CCACGCGGGAGGCCCGGGT	i-tRF	34	30	0	0	0	0	0	0	0	0	0	0	0	0	0	0	0	0	0	0	0	0	0	0
tRF#37-S4I7LZM3Q01M3KQ	GTATGATTCTCGCTTCGGGTGCGAGAGGTCCCGGGTT	i-tRF	0	0	0	0	0	0	15.999	23.001	0	0	0	0	0	0	0	0	0	0	0	0	0	11.001	0	12.999
tRF#36-LM8D4N4OEZB46O0	CGATCTCAACCTATTCTCAAACTTTAAATGGGCAAG	5_U_tRF	10	0	0	10	22	11	10	0	0	0	0	0	0	0	0	0	0	0	0	0	0	0	0	0
tRF#19-6J9KIWIZ	GGAGCTGGGGATTGTGGGT	i-tRF	37	13	0	13	0	0	0	0	0	0	0	0	0	0	0	0	0	0	0	0	0	0	0	0
tRF#19-395P4PK4	CCTTCGATAGCTCAGTTGG	5_tRF	9.999	17.001	0	36	0	0	0	0	0	0	0	0	0	0	0	0	0	0	0	0	0	0	0	0
tRF#27-V0J8O9YEKP4	TAGAGCATGGGACTCTTAATCCCAGGG	i-tRF	0	0	0	0	0	11	14	17	0	0	0	0	0	0	0	20	0	0	0	0	0	0	0	0
tRF#23-RKIP4OI3X	GGGGGATTAGCTCAAATGGTAGA	5_tRF	12	10	0	0	0	13	0	0	0	0	0	0	0	0	0	0	0	0	27	0	0	0	0	0
tRF#23-17NSRJ7K0Q	AGTCTCTTCGGGGGCGTGGGTTT	i-tRF	10	0	0	18	0	0	0	0	11	0	0	0	0	0	0	23	0	0	0	0	0	0	0	0
tRF#19-FEWS3VF8	AGAATTCTCGCCTGCCACG	i-tRF	18	34	0	0	0	0	0	0	0	0	0	0	0	0	0	10	0	0	0	0	0	0	0	0
tRF#20-LM3KZSPJ	CGATCCCGGGTTTCGGCAGC	3_tRF	0	0	0	0	12	0	0	10	14	0	0	0	0	0	0	0	0	0	0	0	0	15	10	0
tRF#20-Y9PYKHM2	TTCTCGCCTGCCACGCGGGA	i-tRF	0	0	0	0	0	0	0	10	0	0	19	17	0	0	0	14	0	0	0	0	0	0	0	0
tRF#19-7PVR31KD	GTTAGTATCCCCGCCTGTC	i-tRF	0	0	0	0	0	0	0	0	0	0	0	0	0	0	21	0	26	13	0	0	0	0	0	0
tRF#33-HM21YP4LR45D0Q	ATATCCAACCTTCAGCTATAGGGTGGAGACTTT	3_U_tRF	0	0	0	0	0	20	0	16	10	0	0	0	0	0	0	13	0	0	0	0	0	0	0	0
tRF#20-5WF918V0	GATGTAGCTCAGTGGTAGAG	5_tRF	0	0	0	22	0	0	0	0	0	0	0	0	0	0	0	13	0	0	0	0	0	0	24	0
tRF#19-Q86774KQ	GCTGGGGCCTGTGTGTTTT	3_U_tRF	59	0	0	0	0	0	0	0	0	0	0	0	0	0	0	0	0	0	0	0	0	0	0	0
tRF#20-VIJIRPF8	TAGCTCAGCTGGTAGAGCGG	i-tRF	0	0	0	0	0	0	0	0	0	0	0	28	0	12	0	0	0	18	0	0	0	0	0	0
tRF#50-0YW77JPEMNFV7SQWU1P0	ACCTGTCTCTGTGGCGCAATCGGTTAGCGCGTTCGGCTGTTAACCGCAAG	other	0	0	57	0	0	0	0	0	0	0	0	0	0	0	0	0	0	0	0	0	0	0	0	0
tRF#19-4LR45DKQ	CTATAGGGTGGAGACTTTT	3_U_tRF	57	0	0	0	0	0	0	0	0	0	0	0	0	0	0	0	0	0	0	0	0	0	0	0
tRF#20-BM32LJK6	AAATCCCGGACGAGCCCCCA	3_tRF	0	0	0	0	9.996	19.992	0	0	0	0	0	0	0	0	0	0	0	0	0	0	0	0	27.006	0
tRF#50-QNR8VP9LFQFY392J1Y0S	GCGTTGGTGGTATAGTGGTAAGCATAGCTGCCTTCCAAGCAGTTGACCCG	5_tRF	0	0	21	0	0	0	0	0	17	0	0	0	0	0	18	0	0	0	0	0	0	0	0	0
tRF#35-94SX73V2Y8L981	TGGTGGTCTAGTGGTTAGGATTCGGCGCTCTCACC	5_tRNA_halve	18	10	0	0	0	0	0	13	15	0	0	0	0	0	0	0	0	0	0	0	0	0	0	0
tRF#23-7I32754W0Q	GTGCTCCGGAGTTACCTCGTTTT	3_U_tRF	0	0	0	0	0	20	0	19	17	0	0	0	0	0	0	0	0	0	0	0	0	0	0	0
tRF#19-XEKJ5RHZ	TGAATCCAGCGATCCGAGT	i-tRF	0	16	0	0	0	0	0	0	0	0	0	0	0	0	0	12	0	17	0	0	0	11	0	0
tRF#22-90Q4R9OMJ	TGGAGGCGTGGGTTCGAATCCC	i-tRF	24.997	0	0	30.004	0	0	0	0	0	0	0	0	0	0	0	0	0	0	0	0	0	0	0	0
tRF#41-8HM2OSRN2NKSEK51B	TCACGCGGGAGACCGGGGTTCAATTCCCCGACGGGGAGCCA	3_tRNA_halve	0	0	0	0	0	0	34	21	0	0	0	0	0	0	0	0	0	0	0	0	0	0	0	0
tRF#28-BSFWK04Z8Q0Q	AACCGAGCGTCCAAGCTCTTTCCATTTT	3_U_tRF	0	0	0	0	0	0	0	22	0	0	0	0	0	0	0	0	0	33	0	0	0	0	0	0
tRF#27-H92EJ1OWZIQ	ATCTCCAAATCAGCCGACGTTTGCTTT	3_U_tRF	32	0	0	0	0	0	0	0	0	0	0	0	0	0	13	0	0	10	0	0	0	0	0	0
tRF#25-PUBUW60XY9	GCCGAAACGATCTCAACCTATTCTC	5_U_tRF	0	0	0	0	12	0	0	0	13	0	0	0	0	0	20	0	0	0	10	0	0	0	0	0
tRF#31-RPM830MMUKLY0	GGTAGCGTGGCCGAGCGGTCTAAGGCGCTGG	5_tRF	0	10.998	0	0	0	0	0	0	0	0	0	0	0	0	0	34.002	9.999	0	0	0	0	0	0	0
tRF#22-2EJ1OWZIQ	CAAATCAGCCGACGTTTGCTTT	3_U_tRF	0	0	0	0	0	0	0	0	0	0	0	0	0	0	54	0	0	0	0	0	0	0	0	0
tRF#50-O2PS5P4PW3FJHPEZUMXK	GAAGAGCCCGGATAGCTCAGTCGGTAGAGCATCAGACTTTTAATCTGAGG	other	0	0	41	0	0	0	0	0	0	0	0	0	0	0	12	0	0	0	0	0	0	0	0	0
tRF#40-Y2R79K3BEE4O3QW6	TTAGAGGTCTTGGGGCCGAAACGATCTCAACCTATTCTCA	5_U_tRF	0	0	21	0	0	0	0	0	17	0	0	0	0	0	0	0	0	0	0	0	15	0	0	0
tRF#22-I7L7P5QKH	ATTCTCGCCTGCCACGCGGGAG	i-tRF	10	0	0	0	0	0	0	0	0	0	13	30	0	0	0	0	0	0	0	0	0	0	0	0
tRF#32-M1M3WD8S746D2	CGGCCCGGGTTCGACTCCCGGTGTGGGAACCA	3_tRF	0	0	0	0	0	16	15	0	0	0	0	0	0	0	10	0	0	0	0	0	0	0	11	0
tRF#25-4U1DYWNLIZ	CTCGAAGGACTTCGTCTGTAATTTT	3_U_tRF	0	0	0	0	0	26	0	0	0	0	0	0	0	0	26	0	0	0	0	0	0	0	0	0
tRF#22-5721V98B3	GATCTCAACCTATTCTCAAACT	5_U_tRF	0	0	0	0	15	13	0	14	0	0	0	0	0	0	0	0	0	10	0	0	0	0	0	0
tRF#19-9NH57S15	TGGTTATCACGTTCGCCTC	i-tRF	22	20	0	10	0	0	0	0	0	0	0	0	0	0	0	0	0	0	0	0	0	0	0	0
tRF#23-5P4PW3FJDD	GATAGCTCAGTCGGTAGAGCATC	i-tRF	10.997	0	0	0	0	0	0	0	0	0	0	0	0	0	0	0	0	29.001	11.998	0	0	0	0	0
tRF#19-PUBUW6E3	GCCGAAACGATCTCAACCT	5_U_tRF	51	0	0	0	0	0	0	0	0	0	0	0	0	0	0	0	0	0	0	0	0	0	0	0
tRF#19-IRMJ6VE2	ATTCCCGGGCGGCGCACCA	3_tRF	12	16	0	23	0	0	0	0	0	0	0	0	0	0	0	0	0	0	0	0	0	0	0	0
tRF#25-87R8WP9I1E	TCCCTGGTGGTCTAGTGGCTAGGAT	5_tRF	11	0	0	0	0	0	0	11	10	0	0	0	0	0	0	18	0	0	0	0	0	0	0	0
tRF#19-UDJKSVHZ	TAAACCAGGGGTCGCGAGT	i-tRF	27	22	0	0	0	0	0	0	0	0	0	0	0	0	0	0	0	0	0	0	0	0	0	0
tRF#36-VUY9RZRML2RRM3E	TATGATTCTCGGTTTGGGTCCGAGAGGTCCCGGGTT	i-tRF	0	0	0	0	0	0	15	21	12	0	0	0	0	0	0	0	0	0	0	0	0	0	0	0
tRF#20-SP58309M	GTCAGGATGGCCGAGTGGTC	5_tRF	0	0	0	0	0	0	0	0	0	0	18	0	0	0	0	0	14	0	0	0	0	0	16	0
tRF#17-877S6V2	TCCCTGTTCGGGCGCCA	3_tRF	48	0	0	0	0	0	0	0	0	0	0	0	0	0	0	0	0	0	0	0	0	0	0	0
tRF#19-R9JP9PJZ	GGTTCCATAGTGTAGTGGT	5_tRF	32.001	15	0	0	0	0	0	0	0	0	0	0	0	0	0	0	0	0	0	0	0	0	0	0
tRF#35-FKWYR1OD5721V9	AGAGGTCTTGGGGCCGAAACGATCTCAACCTATTC	5_U_tRF	18	0	0	0	29	0	0	0	0	0	0	0	0	0	0	0	0	0	0	0	0	0	0	0
tRF#32-ZPQR17NSRJ7KQ	TTTAGGCTCCAGTCTCTTCGGGGGCGTGGGTT	i-tRF	14	0	0	10	0	0	0	0	0	0	0	0	0	0	0	0	13	0	0	10	0	0	0	0
tRF#22-SP58309MO	GTCAGGATGGCCGAGTGGTCTA	5_tRF	15	0	0	0	0	0	0	0	0	0	0	0	0	0	0	10	0	11	0	0	0	11	0	0
tRF#19-RKVP4PJZ	GGGGGTATAGCTCAGTGGT	5_tRF	18.998	0	0	17.003	0	0	0	0	0	0	0	0	0	0	0	0	10.997	0	0	0	0	0	0	0
tRF#20-276JDD3Z	CACCTGGAGCAAGACCCTTT	3_U_tRF	30	0	0	0	0	0	0	0	0	0	0	0	0	0	0	0	0	16	0	0	0	0	0	0
tRF#22-17NSRJ7KQ	AGTCTCTTCGGGGGCGTGGGTT	i-tRF	10.997	0	0	23.002	0	0	0	0	0	0	0	0	0	0	11.998	0	0	0	0	0	0	0	0	0
tRF#27-R8VP9NFQFYJ	GGTGGTATAGTGGTTAGCATAGCTGCC	i-tRF	11	0	0	0	0	0	0	19	0	0	0	0	0	0	15	0	0	0	0	0	0	0	0	0
tRF#23-MXQFSKVHDN	CGTTAGCGCAGTAGGTAGCGCGT	5_tRF	16	16	0	0	0	0	0	0	0	0	0	0	0	0	0	0	0	13	0	0	0	0	0	0
tRF#19-9ILU972Q	TGGCTCGCGATGTCTGTTT	3_U_tRF	45	0	0	0	0	0	0	0	0	0	0	0	0	0	0	0	0	0	0	0	0	0	0	0
tRF#42-P5QK11M3WE8SPOX52	GCCACGCGGGAGGCCCGGGTTCGATTCCCGGCCAATGCACCA	3_tRNA_halve	0	0	16.002	0	0	0	15	0	0	0	0	0	0	0	10.998	0	0	0	0	0	0	0	0	0
tRF#19-S998LOJ4	GTCTCTGTGGCGCAATCGG	5_tRF	27	0	0	14	0	0	0	0	0	0	0	0	0	0	0	0	0	0	0	0	0	0	0	0
tRF#18-PRENRHD2	GCCCCACGTTGGGCGCCA	3_tRF	30	0	0	0	0	0	0	0	11	0	0	0	0	0	0	0	0	0	0	0	0	0	0	0
tRF#21-LN3JWB61B	CGATTCCGGCTCGAAGGACCA	3_tRF	0	0	0	0	0	0	30.998	0	10	0	0	0	0	0	0	0	0	0	0	0	0	0	0	0
tRF#26-VIJK7PF59ME	TAGCTCAGGGGTTAGAGCACTGGTCT	i-tRF	0	0	0	0	0	0	0	0	0	0	0	0	0	0	30.999	0	0	0	0	0	0	0	0	9.999
tRF#19-76RSJMJJ	GTTCAGGTCGCAGTCTCCC	i-tRF	10.998	18.999	0	10.998	0	0	0	0	0	0	0	0	0	0	0	0	0	0	0	0	0	0	0	0
tRF#21-RMMKYOSRE	GGGTCCGGGGTTCAAGTCCCT	i-tRF	0	0	0	0	0	0	0	0	0	0	16	0	0	0	11	0	13	0	0	0	0	0	0	0
tRF#19-BHH9B7F5	AAACGATCTCAACCTATTC	5_U_tRF	40	0	0	0	0	0	0	0	0	0	0	0	0	0	0	0	0	0	0	0	0	0	0	0
tRF#19-3WOZZMHQ	CCTGTGACTTTTGTCCTTT	3_U_tRF	24	0	0	0	0	0	0	0	0	0	0	0	0	0	0	0	0	0	0	0	0	0	16	0
tRF#23-R9J89O9N9	GGTTCCATGGTGTAATGGTTAGC	5_tRF	0	0	0	0	0	0	10.003	18.998	0	0	0	0	0	0	0	10.003	0	0	0	0	0	0	0	0
tRF#41-81JJ6RRNLIK898O1B	TCACCCAGGCGGCCCGGGTTCGACTCCCGGTGTGGGAACCA	3_tRNA_halve	0	11	0	17	11	0	0	0	0	0	0	0	0	0	0	0	0	0	0	0	0	0	0	0
tRF#32-J87383RPD9W1P	CATGGGTGGTTCAGTGGTAGAATTCTCGCCTG	5_tRNA_halve	0	0	0	0	0	0	0	0	0	0	0	0	10	14	15	0	0	0	0	0	0	0	0	0
tRF#21-O7M8LO9L0	GACCTCGTGGCGCAATGGTAG	5_tRF	0	11	0	0	0	0	0	0	0	0	0	0	0	0	0	18	0	10	0	0	0	0	0	0
tRF#20-I72DZOIK	ATTCTCAAACTTTAAATGGG	5_U_tRF	18	0	0	0	0	0	0	0	0	0	0	0	0	0	10	11	0	0	0	0	0	0	0	0
tRF#19-JMRPFQIX	CAGTCGGTAGAGCATGGGA	i-tRF	21	18	0	0	0	0	0	0	0	0	0	0	0	0	0	0	0	0	0	0	0	0	0	0
tRF#33-15WV7W6SJF09DZ	AGTACTCTGCGTTGTGGCCGCAGCAACCTCGGT	i-tRF	19.998	18.999	0	0	0	0	0	0	0	0	0	0	0	0	0	0	0	0	0	0	0	0	0	0
tRF#50-QQDFZ3R918VBY9PYKHM2	GCTATAAGCATTGGTGGTTCAGTGGTAGAATTCTCGCCTGCCACGCGGGA	other	0	0	28	10	0	0	0	0	0	0	0	0	0	0	0	0	0	0	0	0	0	0	0	0
tRF#31-69M8LO9EFVI8B	GGCTCCGTGGCGCAATGGATAGCGCATTGGA	5_tRF	0	0	0	0	0	0	0	0	0	0	0	0	0	0	14	14	0	0	0	0	0	10	0	0
tRF#22-WEF91YS2M	TCGATAGCTCAGTTGGTAGAGC	5_tRF	0	0	10	0	0	0	0	0	0	0	11	0	0	0	0	0	17	0	0	0	0	0	0	0
tRF#21-DRFU8U76B	AATCCAGCGATCCGAGTTCAA	i-tRF	14	14	0	10	0	0	0	0	0	0	0	0	0	0	0	0	0	0	0	0	0	0	0	0
tRF#50-MY73H3RUPLQVNRDF7UK8	CGTTGGTGGTATAGTGGTGAGCATAGCTGCCTTCCAAGCAGTTGACCCGG	5_tRF	0	0	37.002	0	0	0	0	0	0	0	0	0	0	0	0	0	0	0	0	0	0	0	0	0
tRF#35-S4I7LZ93Q01M3K	GTATGATTCTCGCTTTGGGTGCGAGAGGTCCCGGG	i-tRF	0	37.002	0	0	0	0	0	0	0	0	0	0	0	0	0	0	0	0	0	0	0	0	0	0
tRF#19-XPQ9B1KB	TGCAGGCTTCAAACCTGTA	i-tRF	25	0	0	12	0	0	0	0	0	0	0	0	0	0	0	0	0	0	0	0	0	0	0	0
tRF#50-NW3SY3H3RUSMKVNMEH62	CTTGTCCTCGTTAGTATAGTGGTGAGTATCCCCGCCTGTCACGCGGGAGA	other	0	0	36	0	0	0	0	0	0	0	0	0	0	0	0	0	0	0	0	0	0	0	0	0
tRF#19-18YMEN1V	AGTGGTTATCACGTTCGCC	i-tRF	23	13	0	0	0	0	0	0	0	0	0	0	0	0	0	0	0	0	0	0	0	0	0	0
tRF#32-I7XUK87SIRMJ4	ATTCTTGCGACCCGGGTTCGATTCCCGGGCGG	i-tRF	0	11	0	0	0	0	0	14	0	0	0	0	0	0	0	10	0	0	0	0	0	0	0	0
tRF#30-79MP9PMNH5IS	GTTTCCGTAGTGTAGCGGTTATCACATTCG	5_tRF	11	0	0	0	0	0	0	11	0	0	0	0	0	0	0	0	0	0	13	0	0	0	0	0
tRF#19-R11EXBHQ	GGGCCAGGATTGAAACTTT	3_U_tRF	35	0	0	0	0	0	0	0	0	0	0	0	0	0	0	0	0	0	0	0	0	0	0	0
tRF#19-JY73832B	CATTGGTGGTTCAGTGGTA	5_tRF	21	0	0	14	0	0	0	0	0	0	0	0	0	0	0	0	0	0	0	0	0	0	0	0
tRF#23-N44S5N090E	CTGTGCTCCGGAGTTACCTCGTT	3_U_tRF	0	0	0	0	0	0	0	0	18	0	0	0	16	0	0	0	0	0	0	0	0	0	0	0
tRF#26-5NF8635QIQE	GAGTTAGCGGGGAGTGATATATTATT	3_U_tRF	0	18	0	0	0	0	0	0	0	0	0	0	0	0	0	0	15	0	0	0	0	0	0	0
tRF#23-N93VUIRI0Q	CTTTCCCTGCTAACTGGGCTTTT	3_U_tRF	0	0	0	0	0	0	0	0	13	0	0	0	0	0	0	0	0	20	0	0	0	0	0	0
tRF#20-VKS4I7LZ	TAGGGGTATGATTCTCGCTT	i-tRF	0	0	0	0	0	0	0	0	0	0	0	0	0	0	15	0	0	18	0	0	0	0	0	0
tRF#19-94SX732Y	TGGTGGTCTAGTGGTTAGG	5_tRF	17	0	0	16	0	0	0	0	0	0	0	0	0	0	0	0	0	0	0	0	0	0	0	0
tRF#18-NSRJ7K0Q	CTTCGGGGGCGTGGGTTT	i-tRF	21	0	0	12	0	0	0	0	0	0	0	0	0	0	0	0	0	0	0	0	0	0	0	0
tRF#36-NVORRNLNK8QJP1B	CTTGCGACCCGGGTTCGATTCCCGGGCGGCGCACCA	3_tRNA_halve	0	0	0	0	0	11	11	0	0	0	0	0	0	0	10	0	0	0	0	0	0	0	0	0
tRF#31-J87383RPD9W1E	CATGGGTGGTTCAGTGGTAGAATTCTCGCCT	5_tRF	0	0	0	0	0	0	0	0	0	0	22	0	0	0	0	10	0	0	0	0	0	0	0	0
tRF#22-NB8PLML35	CTGAATCCAGCGATCCGAGTTC	i-tRF	11	0	0	10	0	0	0	0	0	0	11	0	0	0	0	0	0	0	0	0	0	0	0	0
tRF#21-V4V47Q2WE	TAGTGTAGTGGTTATCACGTT	i-tRF	0	0	0	0	0	0	0	12	0	0	0	0	0	0	10	10	0	0	0	0	0	0	0	0
tRF#19-B7I72DKO	AACCTATTCTCAAACTTTA	5_U_tRF	18	0	0	13	0	0	0	0	0	0	0	0	0	0	0	0	0	0	0	0	0	0	0	0
tRF#19-1PSJQMFD	AGTAGGTAGCGCGTCAGTC	i-tRF	21	10	0	0	0	0	0	0	0	0	0	0	0	0	0	0	0	0	0	0	0	0	0	0
tRF#33-32VIJMRPFQJD0Q	CCGGATAGCTCAGTCGGTAGAGCATCAGACTTT	5_tRNA_halve	0	0	0	13.998	0	0	0	0	0	0	0	0	0	0	0	0	16.998	0	0	0	0	0	0	0
tRF#19-PW5SVPJZ	GCCGTGATCGTATAGTGGT	5_tRF	29.997	0	0	0	0	0	0	0	0	0	0	0	0	0	0	0	0	0	0	0	0	0	0	0
tRF#19-Q01LQKFK	GCGAGAGGTAGCGGGATCG	i-tRF	0	11.998	0	17.003	0	0	0	0	0	0	0	0	0	0	0	0	0	0	0	0	0	0	0	0
tRF#39-Z46DD8282K69RQKQ	TTGTGGGAACAATGGCACGGCAAGGGGCTCGGTATTTTT	3_U_tRF	0	12	17	0	0	0	0	0	0	0	0	0	0	0	0	0	0	0	0	0	0	0	0	0
tRF#27-FKWYR1OD572	AGAGGTCTTGGGGCCGAAACGATCTCA	5_U_tRF	18	0	0	0	0	0	0	0	0	0	0	0	0	0	0	0	11	0	0	0	0	0	0	0
tRF#19-YS93ZNKQ	TTCCGTGGGTTTGTTTTTT	3_U_tRF	29	0	0	0	0	0	0	0	0	0	0	0	0	0	0	0	0	0	0	0	0	0	0	0
tRF#19-K97JUYKQ	CCCTCGTGGCTACTGTTTT	3_U_tRF	19	10	0	0	0	0	0	0	0	0	0	0	0	0	0	0	0	0	0	0	0	0	0	0
tRF#19-4ZMKQ42E	CTCTTCGGGGGCGTGGGTT	i-tRF	10.997	0	0	17.997	0	0	0	0	0	0	0	0	0	0	0	0	0	0	0	0	0	0	0	0
tRF#47-F91SS2P4FINOW6RM7KQ	AGCTCAGTCGGTAGAGCATGAGACTCTTAATCTCAGGGTCGTGGGTT	i-tRF	0	0	16	0	0	0	0	0	12	0	0	0	0	0	0	0	0	0	0	0	0	0	0	0
tRF#19-31QJ3KKK	CCGCCGCGGCCCGGGTTCG	i-tRF	13	15	0	0	0	0	0	0	0	0	0	0	0	0	0	0	0	0	0	0	0	0	0	0
tRF#32-J8O9YEKPRS935	CATGGGACTCTTAATCCCAGGGTCGTGGGTTC	i-tRF	0	0	0	0	12.999	0	0	0	0	0	0	0	0	0	15	0	0	0	0	0	0	0	0	0
tRF#34-FEWS3V2VR0PS2E	AGAATTCTCGCCTGCCACGCGGGAGGCCCGGGTT	i-tRF	0	0	0	0	0	0	0	0	26	0	0	0	0	0	0	0	0	0	0	0	0	0	0	0
tRF#19-V470VR1M	TAGTGGTGAGTATCCCCGC	i-tRF	11	15	0	0	0	0	0	0	0	0	0	0	0	0	0	0	0	0	0	0	0	0	0	0
tRF#27-R8VP94FQFYJ	GGTGGTATAGTGGTGAGCATAGCTGCC	i-tRF	0	0	0	0	15	0	0	0	0	0	0	0	0	0	0	0	0	10.998	0	0	0	0	0	0
tRF#26-RWF918V0LW0	GGTGTAGCTCAGTGGTAGAGCGCGTG	5_tRF	0	0	0	12	0	0	0	0	0	0	0	0	0	0	0	0	0	13.998	0	0	0	0	0	0
tRF#33-Y0QR17NSRJ7K0Q	TTAAGGCTCCAGTCTCTTCGGGGGCGTGGGTTT	i-tRF	13	0	0	0	0	0	0	0	12	0	0	0	0	0	0	0	0	0	0	0	0	0	0	0
tRF#19-3KUZWLKQ	CCGGGTACTTTCGTATTTT	3_U_tRF	14	0	0	11	0	0	0	0	0	0	0	0	0	0	0	0	0	0	0	0	0	0	0	0
tRF#18-ME6KM80E	CGGATGGAGGCGTGGGTT	i-tRF	14	0	0	11	0	0	0	0	0	0	0	0	0	0	0	0	0	0	0	0	0	0	0	0
tRF#38-5QKDN6QQ1362NZ0H	GATATCCAACCTTCAGCTATAGGGTGGAGACTTTTTAG	3_U_tRF	0	0	0	0	0	12	0	12	0	0	0	0	0	0	0	0	0	0	0	0	0	0	0	0
tRF#19-MF1K1Z2Q	CGGCAAGGGGAGTTTGTTT	3_U_tRF	0	0	0	24	0	0	0	0	0	0	0	0	0	0	0	0	0	0	0	0	0	0	0	0
tRF#19-21V98BHQ	CAACCTATTCTCAAACTTT	5_U_tRF	0	0	0	24	0	0	0	0	0	0	0	0	0	0	0	0	0	0	0	0	0	0	0	0
tRF#24-6LQ6S8V01D	GGATAGCTCAGTCGGTAGAGCATC	5_tRF	0	0	0	0	0	0	0	0	0	0	0	0	0	0	23.002	0	0	0	0	0	0	0	0	0
tRF#45-PS5P4PW3FJHPEZUMXK	GCCCGGATAGCTCAGTCGGTAGAGCATCAGACTTTTAATCTGAGG	5_tRF	10	0	0	0	0	0	0	0	0	0	0	0	0	0	13	0	0	0	0	0	0	0	0	0
tRF#44-QNR8VP9NFQFY392JFE	GCGTTGGTGGTATAGTGGTTAGCATAGCTGCCTTCCAAGCAGTT	5_tRF	12	11	0	0	0	0	0	0	0	0	0	0	0	0	0	0	0	0	0	0	0	0	0	0
tRF#25-QSD2NSWWDZ	GCTCGAAGGACTTCGTCTGTAATTT	3_U_tRF	0	0	0	0	0	0	0	0	0	0	0	0	0	0	23	0	0	0	0	0	0	0	0	0
tRF#24-N93VUIRIKQ	CTTTCCCTGCTAACTGGGCTTTTT	3_U_tRF	0	0	0	0	0	0	0	0	0	0	0	0	0	0	0	0	0	23	0	0	0	0	0	0
tRF#24-8OHP3D7YHQ	TCCAAATCAGCCGACGTTTGCTTT	3_U_tRF	23	0	0	0	0	0	0	0	0	0	0	0	0	0	0	0	0	0	0	0	0	0	0	0
tRF#20-36OKW6NZ	CCTCAGAAGGTCTCACTTTT	3_U_tRF	0	0	0	0	0	0	0	0	0	0	0	0	0	0	10	0	13	0	0	0	0	0	0	0
tRF#19-P8SIYWFQ	GCCGGGTACTTTCGTATTT	3_U_tRF	12	11	0	0	0	0	0	0	0	0	0	0	0	0	0	0	0	0	0	0	0	0	0	0
tRF#19-4Y4M63KQ	CTCTGCTATCGGAGTTTTT	3_U_tRF	23	0	0	0	0	0	0	0	0	0	0	0	0	0	0	0	0	0	0	0	0	0	0	0
tRF#18-SJ83RP9	GTAGCTCAGTGGTAGAGC	i-tRF	0	0	0	0	0	0	0	0	0	0	0	0	0	0	12	0	0	0	0	0	0	11	0	0
tRF#16-D81H93E	AATGGAGGCGTGGGTT	i-tRF	23	0	0	0	0	0	0	0	0	0	0	0	0	0	0	0	0	0	0	0	0	0	0	0
tRF#50-Z3R918VBY9PYKHM26RRN	TTGGTGGTTCAGTGGTAGAATTCTCGCCTGCCACGCGGGAGGCCCGGGTT	5_tRF	0	0	22.001	0	0	0	0	0	0	0	0	0	0	0	0	0	0	0	0	0	0	0	0	0
tRF#31-6RRNLIK898O1B	GGCCCGGGTTCGACTCCCGGTGTGGGAACCA	3_tRF	11	0	0	0	0	11	0	0	0	0	0	0	0	0	0	0	0	0	0	0	0	0	0	0
tRF#19-WS3V2VIX	TCTCGCCTGCCACGCGGGA	i-tRF	22	0	0	0	0	0	0	0	0	0	0	0	0	0	0	0	0	0	0	0	0	0	0	0
tRF#19-VKS4I71W	TAGGGGTATGATTCTCGCT	i-tRF	0	11	0	11	0	0	0	0	0	0	0	0	0	0	0	0	0	0	0	0	0	0	0	0
tRF#19-87R8WPJZ	TCCCTGGTGGTCTAGTGGT	5_tRF	22	0	0	0	0	0	0	0	0	0	0	0	0	0	0	0	0	0	0	0	0	0	0	0
tRF#17-LNKSEKL	CGATTCCCCGACGGGGA	3_tRF	21.996	0	0	0	0	0	0	0	0	0	0	0	0	0	0	0	0	0	0	0	0	0	0	0
tRF#19-947673E6	TGGTGGTTCAGTGGTAGAA	5_tRF	12.73	9.09	0	0	0	0	0	0	0	0	0	0	0	0	0	0	0	0	0	0	0	0	0	0
tRF#37-70K84J83ML5FX23	GTGAGCCCGGCTAGCTCAGTCGGTAGAGCATGAGACT	other	0	0	0	0	0	0	0	0	0	0	0	0	0	0	21	0	0	0	0	0	0	0	0	0
tRF#21-NLHRF5Z80	CTGTAATCCCAGCACTTTGGG	3_U_tRF	0	0	0	0	10	11	0	0	0	0	0	0	0	0	0	0	0	0	0	0	0	0	0	0
tRF#20-X29X3PMZ	TGAGATGTTACCTAGCGTTT	3_U_tRF	0	0	0	0	0	0	0	10	0	0	0	0	0	0	0	0	0	11	0	0	0	0	0	0
tRF#19-94V4SMFM	TGGTGTAGTGGTATCATGC	i-tRF	11	0	0	10	0	0	0	0	0	0	0	0	0	0	0	0	0	0	0	0	0	0	0	0
tRF#19-RPM8301Z	GGTAGCGTGGCCGAGCGGT	5_tRF	10.998	0	0	0	0	0	0	0	0	0	0	0	0	0	0	9.999	0	0	0	0	0	0	0	0
tRF#23-YU4RRWRBD2	TTCGACTCCCGGTGTGGGAACCA	3_tRF	0	0	0	0	0	0	10	0	0	0	0	0	0	0	0	0	0	10	0	0	0	0	0	0
tRF#20-SJ83ML5F	GTAGCTCAGTCGGTAGAGCA	i-tRF	0	0	0	0	0	0	0	0	0	0	10	0	0	0	10	0	0	0	0	0	0	0	0	0
tRF#19-DRMD5112	AATCCCGGACGAGCCCCCA	3_tRF	0	0	0	19.005	0	0	0	0	0	0	0	0	0	0	0	0	0	0	0	0	0	0	0	0
tRF#34-FKWYR1OD5721JE	AGAGGTCTTGGGGCCGAAACGATCTCAACCTATT	5_U_tRF	19	0	0	0	0	0	0	0	0	0	0	0	0	0	0	0	0	0	0	0	0	0	0	0
tRF#23-M1M3WD8S00	CGGCCCGGGTTCGACTCCCGGTG	i-tRF	0	0	0	0	0	0	0	0	0	0	0	0	0	0	0	18	0	0	0	0	0	0	0	0
tRF#19-FKWYR1H6	AGAGGTCTTGGGGCCGAAA	5_U_tRF	18	0	0	0	0	0	0	0	0	0	0	0	0	0	0	0	0	0	0	0	0	0	0	0
tRF#36-I7XUK87SIRMJ6VB	ATTCTTGCGACCCGGGTTCGATTCCCGGGCGGCGCA	3_tRNA_halve	0	17	0	0	0	0	0	0	0	0	0	0	0	0	0	0	0	0	0	0	0	0	0	0
tRF#32-WYL1M3WE8S68K	TCTTGCGACCCGGGTTCGATTCCCGGGCGGCG	3_tRNA_halve	0	0	0	0	0	0	0	0	0	0	0	0	0	0	0	17	0	0	0	0	0	0	0	0
tRF#21-276JDD3ZE	CACCTGGAGCAAGACCCTTTT	3_U_tRF	17	0	0	0	0	0	0	0	0	0	0	0	0	0	0	0	0	0	0	0	0	0	0	0
tRF#19-821IQ4KK	TCAGAAGGCTGCGTGTTCG	i-tRF	17	0	0	0	0	0	0	0	0	0	0	0	0	0	0	0	0	0	0	0	0	0	0	0
tRF#19-69QESYKQ	GGCTCGCGATGTCTGTTTT	3_U_tRF	17	0	0	0	0	0	0	0	0	0	0	0	0	0	0	0	0	0	0	0	0	0	0	0
tRF#16-J81H93E	CATGGAGGCGTGGGTT	i-tRF	17	0	0	0	0	0	0	0	0	0	0	0	0	0	0	0	0	0	0	0	0	0	0	0
tRF#45-Z87HFK8SR9BM32LJK6	TTTGGGTGCGAGAGGTCCCGGGTTCAAATCCCGGACGAGCCCCCA	3_tRF	0	0	0	16.002	0	0	0	0	0	0	0	0	0	0	0	0	0	0	0	0	0	0	0	0
tRF#22-HXD3KY7SI	ATCTAAAGGTCCCTGGTTCGAT	i-tRF	16.002	0	0	0	0	0	0	0	0	0	0	0	0	0	0	0	0	0	0	0	0	0	0	0
tRF#20-EJ7E8L3Z	ACGGCGTGATTCATACCTTT	3_U_tRF	16	0	0	0	0	0	0	0	0	0	0	0	0	0	0	0	0	0	0	0	0	0	0	0
tRF#19-N4EZ9RKQ	CTGTGACTTTTGTCCTTTT	3_U_tRF	16	0	0	0	0	0	0	0	0	0	0	0	0	0	0	0	0	0	0	0	0	0	0	0
tRF#21-9L5H52NL0	TGGTAGAGCGGAGGACTGTAG	i-tRF	0	0	0	0	0	0	0	0	0	0	0	0	0	0	0	0	0	15.75	0	0	0	0	0	0
tRF#19-P97PLP2Y	GCCTCGTTAGCGCAGTAGG	5_tRF	0	0	0	15	0	0	0	0	0	0	0	0	0	0	0	0	0	0	0	0	0	0	0	0
tRF#19-4J83MLH9	CTAGCTCAGTCGGTAGAGC	i-tRF	15	0	0	0	0	0	0	0	0	0	0	0	0	0	0	0	0	0	0	0	0	0	0	0
tRF#19-1SS2P4IR	AGTCGGTAGAGCATGGGAC	i-tRF	15	0	0	0	0	0	0	0	0	0	0	0	0	0	0	0	0	0	0	0	0	0	0	0
tRF#32-1HPSR9O9337KF	AGGCGGCCCGGGTTCGACTCCCGGTGTGGGAA	3_tRF	14	0	0	0	0	0	0	0	0	0	0	0	0	0	0	0	0	0	0	0	0	0	0	0
tRF#29-K6MY6VRNSDKQ	CCCCACGTTGGGCGCGGGTTGTAACTTTT	3_U_tRF	14	0	0	0	0	0	0	0	0	0	0	0	0	0	0	0	0	0	0	0	0	0	0	0
tRF#19-X6RNQWHQ	TGCCAGGGTTGCTGTCTTT	3_U_tRF	14	0	0	0	0	0	0	0	0	0	0	0	0	0	0	0	0	0	0	0	0	0	0	0
tRF#19-W60XY90R	TCTCAACCTATTCTCAAAC	5_U_tRF	14	0	0	0	0	0	0	0	0	0	0	0	0	0	0	0	0	0	0	0	0	0	0	0
tRF#19-23KYY8IN	CAAGTCCCTGTTCGGGCGT	3_tRF	14	0	0	0	0	0	0	0	0	0	0	0	0	0	0	0	0	0	0	0	0	0	0	0
tRF#19-1QKS3WF8	AGTATCCCCGCCTGTCACG	i-tRF	14	0	0	0	0	0	0	0	0	0	0	0	0	0	0	0	0	0	0	0	0	0	0	0
tRF#20-93Q01M3K	TGGGTGCGAGAGGTCCCGGG	i-tRF	0	0	0	0	0	0	0	0	0	0	0	0	0	0	0	13.998	0	0	0	0	0	0	0	0
tRF#41-Y2R79K3BEE4O3QW6B	TTAGAGGTCTTGGGGCCGAAACGATCTCAACCTATTCTCAA	5_U_tRF	0	0	13	0	0	0	0	0	0	0	0	0	0	0	0	0	0	0	0	0	0	0	0	0
tRF#23-XN4VZ87HX	TGATTCTCGCTTTGGGTGCGAGA	i-tRF	13	0	0	0	0	0	0	0	0	0	0	0	0	0	0	0	0	0	0	0	0	0	0	0
tRF#20-V0SZRJLB	TAGAGGTCTTGGGGCCGAAA	5_U_tRF	13	0	0	0	0	0	0	0	0	0	0	0	0	0	0	0	0	0	0	0	0	0	0	0
tRF#19-Z95EEWKQ	TTTTCGAGATACTGTTTTT	3_U_tRF	13	0	0	0	0	0	0	0	0	0	0	0	0	0	0	0	0	0	0	0	0	0	0	0
tRF#19-897PVPJZ	TCCTCGTTAGTATAGTGGT	5_tRF	13	0	0	0	0	0	0	0	0	0	0	0	0	0	0	0	0	0	0	0	0	0	0	0
tRF#25-7JPJ60MV9J	GTGGCGCAGCGGAAGCGTGCTGGGC	i-tRF	0	0	0	0	0	0	0	0	0	0	0	0	0	0	0	12.996	0	0	0	0	0	0	0	0
tRF#25-QNR8VP9LFQ	GCGTTGGTGGTATAGTGGTAAGCAT	5_tRF	0	0	0	0	0	0	0	0	0	0	0	0	0	0	12	0	0	0	0	0	0	0	0	0
tRF#25-7LQ673FJQ4	GTGTAGCTCAGTGGTAGAGCGCGTG	5_tRF	0	0	0	0	0	0	0	0	0	0	0	0	0	0	0	0	12	0	0	0	0	0	0	0
tRF#19-UJJKIWIZ	TAAGCCAGGGATTGTGGGT	i-tRF	0	12	0	0	0	0	0	0	0	0	0	0	0	0	0	0	0	0	0	0	0	0	0	0
tRF#19-7383RPEE	GTGGTTCAGTGGTAGAATT	i-tRF	0	0	0	0	0	0	0	0	0	0	0	0	0	0	0	0	12	0	0	0	0	0	0	0
tRF#19-OUR830JZ	GACGAGGTGGCCGAGTGGT	5_tRF	0	0	0	0	0	0	0	0	0	0	0	0	0	0	0	0	0	0	11.998	0	0	0	0	0
tRF#23-24RN8RPFDZ	CAATGGGGTTTCCCCGCACAGGT	i-tRF	0	0	0	11	0	0	0	0	0	0	0	0	0	0	0	0	0	0	0	0	0	0	0	0
tRF#20-R8ZP9LON	GGTGGTTTAGTGGTAGAATT	i-tRF	0	0	0	0	0	0	0	0	0	0	0	0	0	0	0	0	0	11	0	0	0	0	0	0
tRF#19-73VL8RI3	GTGGTTAGTATCCCCGCCT	i-tRF	11	0	0	0	0	0	0	0	0	0	0	0	0	0	0	0	0	0	0	0	0	0	0	0
tRF#19-6VRNSDKQ	GGCGCGGGTTGTAACTTTT	3_U_tRF	11	0	0	0	0	0	0	0	0	0	0	0	0	0	0	0	0	0	0	0	0	0	0	0
tRF#19-1YS2Q2IR	AGTTGGTAGAGCGGAGGAC	i-tRF	11	0	0	0	0	0	0	0	0	0	0	0	0	0	0	0	0	0	0	0	0	0	0	0
tRF#17-LNK88KL	CGATTCCCGGTCAGGGA	3_tRF	11	0	0	0	0	0	0	0	0	0	0	0	0	0	0	0	0	0	0	0	0	0	0	0
tRF#19-M91MP3HJ	CGTTCAGGTCGCAGTCTCC	i-tRF	10.998	0	0	0	0	0	0	0	0	0	0	0	0	0	0	0	0	0	0	0	0	0	0	0
tRF#32-4YO9XEKJ5R5N2	CTCTGGACTCTGAATCCAGCGATCCGAGTTCA	i-tRF	10.003	0	0	0	0	0	0	0	0	0	0	0	0	0	0	0	0	0	0	0	0	0	0	0
tRF#23-69JMW9RKDN	GGCTCCAGTCTCTTCGGGGGCGT	i-tRF	0	0	0	0	0	0	0	0	0	0	0	0	0	0	0	0	10.003	0	0	0	0	0	0	0
tRF#31-Q8RESJ83RPFV0	GCTGGGGGATGTAGCTCAGTGGTAGAGCGCG	5_U_tRF	0	0	0	0	0	0	0	0	0	0	0	0	0	0	0	0	0	10	0	0	0	0	0	0
tRF#30-Q8RESJ83RPFV	GCTGGGGGATGTAGCTCAGTGGTAGAGCGC	5_U_tRF	10	0	0	0	0	0	0	0	0	0	0	0	0	0	0	0	0	0	0	0	0	0	0	0
tRF#24-F8F7WEF9FE	AGCGGAGCCTTCGATAGCTCAGTT	5_U_tRF	0	0	0	10	0	0	0	0	0	0	0	0	0	0	0	0	0	0	0	0	0	0	0	0
tRF#22-Z3FJ6KEWH	TTGGTAGAGCGGAGGACTGTAG	i-tRF	0	0	0	0	0	0	0	0	0	0	0	0	0	0	0	0	10	0	0	0	0	0	0	0
tRF#22-HR6HFR1IQ	ATCCCGGACGAGCCCAGGCTTT	3_U_tRF	0	0	0	0	0	0	0	0	0	0	0	0	0	0	0	0	10	0	0	0	0	0	0	0
tRF#19-XMSL732Z	TGATCGTATAGTGGTTAGT	5_tRF	0	0	0	10	0	0	0	0	0	0	0	0	0	0	0	0	0	0	0	0	0	0	0	0
tRF#19-RX6NMHH3	GGTTAGGATTCGGCGCTCT	i-tRF	10	0	0	0	0	0	0	0	0	0	0	0	0	0	0	0	0	0	0	0	0	0	0	0
tRF#19-E9XFJ92Q	ACTTCTGACACATTCGTTT	3_U_tRF	0	10	0	0	0	0	0	0	0	0	0	0	0	0	0	0	0	0	0	0	0	0	0	0
tRF#19-924ZDRFY	TGGGACTCTTAATCCCAGG	i-tRF	0	0	0	10	0	0	0	0	0	0	0	0	0	0	0	0	0	0	0	0	0	0	0	0
tRF#19-2DZOIKFS	CAAACTTTAAATGGGCAAG	5_U_tRF	10	0	0	0	0	0	0	0	0	0	0	0	0	0	0	0	0	0	0	0	0	0	0	0
tRF#50-FH1J8QF91KY2QIR79O0P	AGACGAGGGCTCCATAGCTCAGGGGTTAGAGCGCTGGTCTTGTAAACCAG	other	0	0	0	0	0	0	0	0	0	0	0	0	0	0	0	0	0	0	0	0	0	0	0	0
tRF#43-96L85DMKYUYRLHR0D2	TGTCACGCGGGAGACCGGGGTTCGATTCCCCGACGGGGAGCCA	3_tRF	0	0	0	0	0	0	0	0	0	0	0	0	0	0	0	0	0	0	0	0	0	0	0	0
tRF#42-S5QKF1R3WE8RO86J2	GTCACGCGGGAGACCGGGGTTCGATTCCCCGACGGGGAGCCA	3_tRNA_halve	0	0	0	0	0	0	0	0	0	0	0	0	0	0	0	0	0	0	0	0	0	0	0	0
tRF#35-S4I7LZM3Q01M3K	GTATGATTCTCGCTTCGGGTGCGAGAGGTCCCGGG	i-tRF	0	0	0	0	0	0	0	0	0	0	0	0	0	0	0	0	0	0	0	0	0	0	0	0
tRF#35-8R6Q46D6PUMZQZ	TCCCCGGCATCTCCAAATCAGCCGACGTTTGCTTT	3_U_tRF	0	0	0	0	0	0	0	0	0	0	0	0	0	0	0	0	0	0	0	0	0	0	0	0
tRF#33-VUY9Q9R4L2RRD4	TATGATTCTCGCTTCGGGTGCGAGAGGTCCCGG	i-tRF	0	0	0	0	0	0	0	0	0	0	0	0	0	0	0	0	0	0	0	0	0	0	0	0
tRF#33-IEWSNYRV50SRDY	ATGATTCTCGCTTTGGGTGCGAGAGGTCCCGGG	i-tRF	0	0	0	0	0	0	0	0	0	0	0	0	0	0	0	0	0	0	0	0	0	0	0	0
tRF#33-IEWSNSRV50SRDY	ATGATTCTCGCTTCGGGTGCGAGAGGTCCCGGG	i-tRF	0	0	0	0	0	0	0	0	0	0	0	0	0	0	0	0	0	0	0	0	0	0	0	0
tRF#31-6978WPRLXN4VE	GGCTCGTTGGTCTAGGGGTATGATTCTCGCT	5_tRF	0	0	0	0	0	0	0	0	0	0	0	0	0	0	0	0	0	0	0	0	0	0	0	0
tRF#25-RMJKYOSR99	GGGTCCAGGGTTCAAGTCCCTGTTC	i-tRF	0	0	0	0	0	0	0	0	0	0	0	0	0	0	0	0	0	0	0	0	0	0	0	0
tRF#25-8O9KZR3FJ3	TCCAATGGGGTTTCCCCGCACAGGT	i-tRF	0	0	0	0	0	0	0	0	0	0	0	0	0	0	0	0	0	0	0	0	0	0	0	0
tRF#25-53N86SBHH9	GAGGTCTTGGGGCCGAAACGATCTC	5_U_tRF	0	0	0	0	0	0	0	0	0	0	0	0	0	0	0	0	0	0	0	0	0	0	0	0
tRF#24-RKVP4P93ES	GGGGGTATAGCTCAGTGGGTAGAG	5_tRF	0	0	0	0	0	0	0	0	0	0	0	0	0	0	0	0	0	0	0	0	0	0	0	0
tRF#24-J87383RPEE	CATGGGTGGTTCAGTGGTAGAATT	5_tRF	0	0	0	0	0	0	0	0	0	0	0	0	0	0	0	0	0	0	0	0	0	0	0	0
tRF#23-XN48Z8SSX	TGATTCTCGGTTTGGGTCCGAGA	i-tRF	0	0	0	0	0	0	0	0	0	0	0	0	0	0	0	0	0	0	0	0	0	0	0	0
tRF#23-R3SJ83RP9	GGGGTGTAGCTCAGTGGTAGAGC	5_tRF	0	0	0	0	0	0	0	0	0	0	0	0	0	0	0	0	0	0	0	0	0	0	0	0
tRF#23-90Q4R9OMD2	TGGAGGCGTGGGTTCGAATCCCA	i-tRF	0	0	0	0	0	0	0	0	0	0	0	0	0	0	0	0	0	0	0	0	0	0	0	0
tRF#23-1HR2YJ8B04	AGGCGGGGGATTAGCTCAAATGG	5_U_tRF	0	0	0	0	0	0	0	0	0	0	0	0	0	0	0	0	0	0	0	0	0	0	0	0
tRF#22-YUYRR6RBJ	TTCGATTCCCGGTCAGGGAACC	3_tRF	0	0	0	0	0	0	0	0	0	0	0	0	0	0	0	0	0	0	0	0	0	0	0	0
tRF#22-S027X7QK3	GTAAGCACCTTGCCTGCGGGCT	i-tRF	0	0	0	0	0	0	0	0	0	0	0	0	0	0	0	0	0	0	0	0	0	0	0	0
tRF#22-O9XEKJ5RL	GACTCTGAATCCAGCGATCCGA	i-tRF	0	0	0	0	0	0	0	0	0	0	0	0	0	0	0	0	0	0	0	0	0	0	0	0
tRF#22-N93VUIRIQ	CTTTCCCTGCTAACTGGGCTTT	3_U_tRF	0	0	0	0	0	0	0	0	0	0	0	0	0	0	0	0	0	0	0	0	0	0	0	0
tRF#21-YRXXE8QZE	TTCCCTGCTAACTGGGCTTTT	3_U_tRF	0	0	0	0	0	0	0	0	0	0	0	0	0	0	0	0	0	0	0	0	0	0	0	0
tRF#21-P97PLPV3B	GCCTCGTTAGCGCAGTAGGTA	5_tRF	0	0	0	0	0	0	0	0	0	0	0	0	0	0	0	0	0	0	0	0	0	0	0	0
tRF#20-YRXXE8QZ	TTCCCTGCTAACTGGGCTTT	3_U_tRF	0	0	0	0	0	0	0	0	0	0	0	0	0	0	0	0	0	0	0	0	0	0	0	0
tRF#20-89XXW27Z	TCCTCTGCTATCGGAGTTTT	3_U_tRF	0	0	0	0	0	0	0	0	0	0	0	0	0	0	0	0	0	0	0	0	0	0	0	0
tRF#19-ZKXU531K	TTGGGTGCGAGAGGTCCCG	i-tRF	0	0	0	0	0	0	0	0	0	0	0	0	0	0	0	0	0	0	0	0	0	0	0	0
tRF#19-Z3FJ6KEP	TTGGTAGAGCGGAGGACTG	i-tRF	0	0	0	0	0	0	0	0	0	0	0	0	0	0	0	0	0	0	0	0	0	0	0	0
tRF#19-W3FJIKE5	TCGGTAGAGCATGGGACTC	i-tRF	0	0	0	0	0	0	0	0	0	0	0	0	0	0	0	0	0	0	0	0	0	0	0	0
tRF#19-VKS4I71Z	TAGGGGTATGATTCTCGGT	i-tRF	0	0	0	0	0	0	0	0	0	0	0	0	0	0	0	0	0	0	0	0	0	0	0	0
tRF#19-V4QP59I8	TAGTGGCTAGGATTCGGCG	i-tRF	0	0	0	0	0	0	0	0	0	0	0	0	0	0	0	0	0	0	0	0	0	0	0	0
tRF#19-POX5Z6KQ	GCCAATGCACTTTCATTTT	3_U_tRF	0	0	0	0	0	0	0	0	0	0	0	0	0	0	0	0	0	0	0	0	0	0	0	0
tRF#19-P7M84I2Q	GCCCTCGTGGCTACTGTTT	3_U_tRF	0	0	0	0	0	0	0	0	0	0	0	0	0	0	0	0	0	0	0	0	0	0	0	0
tRF#19-OP7JMNEW	GACAGGTGGCCGGTTAGCT	5_U_tRF	0	0	0	0	0	0	0	0	0	0	0	0	0	0	0	0	0	0	0	0	0	0	0	0
tRF#19-MIF91S2H	CGGCTAGCTCAGTCGGTAG	5_tRF	0	0	0	0	0	0	0	0	0	0	0	0	0	0	0	0	0	0	0	0	0	0	0	0
tRF#19-KSR95R14	CCCCGGGTTCGATCCCCGG	i-tRF	0	0	0	0	0	0	0	0	0	0	0	0	0	0	0	0	0	0	0	0	0	0	0	0
tRF#19-KB8JLHKP	CCAAATCAGCCGACGTTTG	3_U_tRF	0	0	0	0	0	0	0	0	0	0	0	0	0	0	0	0	0	0	0	0	0	0	0	0
tRF#19-I89NJ42H	ATTGGTGGTTCAGTGGTAG	5_tRF	0	0	0	0	0	0	0	0	0	0	0	0	0	0	0	0	0	0	0	0	0	0	0	0
tRF#19-FRJ4O1E2	AGCCCCAGTGGAACCACCA	3_tRF	0	0	0	0	0	0	0	0	0	0	0	0	0	0	0	0	0	0	0	0	0	0	0	0
tRF#19-EKDWJIKQ	ACGGGAATGTCAGCTTTTT	3_U_tRF	0	0	0	0	0	0	0	0	0	0	0	0	0	0	0	0	0	0	0	0	0	0	0	0
tRF#19-BUW60XK3	AACGATCTCAACCTATTCT	5_U_tRF	0	0	0	0	0	0	0	0	0	0	0	0	0	0	0	0	0	0	0	0	0	0	0	0
tRF#19-8NWE6WIZ	TCATTTCGATGGCGTGGGT	i-tRF	0	0	0	0	0	0	0	0	0	0	0	0	0	0	0	0	0	0	0	0	0	0	0	0
tRF#19-881X3SKQ	TCCGGAGTTACCTCGTTTT	3_U_tRF	0	0	0	0	0	0	0	0	0	0	0	0	0	0	0	0	0	0	0	0	0	0	0	0
tRF#19-78Y2Q42M	GTTGGTTAGAGCGTGGTGC	i-tRF	0	0	0	0	0	0	0	0	0	0	0	0	0	0	0	0	0	0	0	0	0	0	0	0
tRF#19-73FJP4HQ	GTGGTAGAGCGCATGCTTT	i-tRF	0	0	0	0	0	0	0	0	0	0	0	0	0	0	0	0	0	0	0	0	0	0	0	0
tRF#19-6XQ6S82X	GGCTAGCTCAGTCGGTAGA	5_tRF	0	0	0	0	0	0	0	0	0	0	0	0	0	0	0	0	0	0	0	0	0	0	0	0
tRF#19-5E754J2Q	GAGATGTTACCTAGCGTTT	3_U_tRF	0	0	0	0	0	0	0	0	0	0	0	0	0	0	0	0	0	0	0	0	0	0	0	0
tRF#19-4O3QW60W	CTCAACCTATTCTCAAACT	5_U_tRF	0	0	0	0	0	0	0	0	0	0	0	0	0	0	0	0	0	0	0	0	0	0	0	0
tRF#19-4N4OEZ07	CTATTCTCAAACTTTAAAT	5_U_tRF	0	0	0	0	0	0	0	0	0	0	0	0	0	0	0	0	0	0	0	0	0	0	0	0
tRF#19-4KRQ59JM	CTAGGGGTATGATTCTCGC	i-tRF	0	0	0	0	0	0	0	0	0	0	0	0	0	0	0	0	0	0	0	0	0	0	0	0
tRF#19-4KRQ59J4	CTAGGGGTATGATTCTCGG	i-tRF	0	0	0	0	0	0	0	0	0	0	0	0	0	0	0	0	0	0	0	0	0	0	0	0
tRF#19-3BHJ83JY	CCGAAATAGCTCAGTTGGG	5_tRF	0	0	0	0	0	0	0	0	0	0	0	0	0	0	0	0	0	0	0	0	0	0	0	0
tRF#19-1PSJPMFD	AGTAGGTAGCGCATCAGTC	i-tRF	0	0	0	0	0	0	0	0	0	0	0	0	0	0	0	0	0	0	0	0	0	0	0	0
tRF#19-18X3HR1V	AGTGGTGAGTATCCCCGCC	i-tRF	0	0	0	0	0	0	0	0	0	0	0	0	0	0	0	0	0	0	0	0	0	0	0	0
tRF#19-0HRF2LFQ	ACACGGGGCACAATAATTT	3_U_tRF	0	0	0	0	0	0	0	0	0	0	0	0	0	0	0	0	0	0	0	0	0	0	0	0
tRF#18-881X3S0Q	TCCGGAGTTACCTCGTTT	3_U_tRF	0	0	0	0	0	0	0	0	0	0	0	0	0	0	0	0	0	0	0	0	0	0	0	0
tRF#17-741M3KQ	GTGTGAGGTCCCGGGTT	i-tRF	0	0	0	0	0	0	0	0	0	0	0	0	0	0	0	0	0	0	0	0	0	0	0	0
tRF#17-23KYY8M	CAAGTCCCTGTTCGGGC	3_tRF	0	0	0	0	0	0	0	0	0	0	0	0	0	0	0	0	0	0	0	0	0	0	0	0
