# Supplementary material for: Shedding Light on tRNA-Derived Fragment Repertoire in Facs Blood Cells
Source: Preprints.org preprint supplement (doi:10.20944/preprints202409.0477.v1), 2024-09-05
Supplement: Supplementary file 4 [file supl COVID clinical data.doc]

|  | **Patient 1** | **Patient 2** | **Patient 3** | **Patient 4** | **Patient 5** |
| --- | --- | --- | --- | --- | --- |
| IL-6 (pg/ml) | 61,8 | 204,6 | 62,54 | 399 | 2 398 |
| CRP (C-reactive protein) mg/L | 106,7 | 45,1 | 105,7 | 58,9 | 10,2 |
| Red blood cells (RBC)10^12/L | 3,18 | 4,29 | 4,69 | 3,72 | 3,77 |
| Lymphocytes (LYMPH)10^9/L | 2,73 | 0,72 | 1,03 | 0,71 | 0,65 |
| Monocytes (MONO)10^9/L | 1,73 | 0,19 | 0,5 | 0,45 | 0,11 |
| Neutrophils (NEUT)10^9/L | 9,61 | 7,77 | 11,16 | 1,04 | 3,16 |
| Eosinophils (EOS)10^9/L | 0,33 | 0,19 | 0 | 0 | 0,03 |
| Basophils (BASO)10^9/L | 0,03 | 0,01 | 0,01 | 0,01 | 0,01 |
